# Supplementary material for: Transcript Profiling Identifies Dynamic Gene Expression Patterns and an Important Role for Nrf2/Keap1 Pathway in the Developing Mouse Esophagus
Source: PLoS One. 2012 May 2;7(5):e36504. doi: 10.1371/journal.pone.0036504 (PMC3342176; doi:10.1371/journal.pone.0036504)
Supplement: Excel S1 — Knowledge-based gene sets and references. (XLS) [file pone.0036504.s007.xls]

## Sheet: P63 target genes
P63 target genes
	Reference: Wang X, Ouyang H, Yamamoto Y, Kumar PA, Wei TS, Dagher R, Vincent M, Lu X, Bellizzi AM, Ho KY, Crum CP, Xian W, McKeon F. Residual embryonic cells as precursors of a Barrett's-like metaplasia. Cell. 2011;145(7):1023-35.
Flg
Crct1	Note: These genes are downregulated in the esophagus of p63-/- mice according to gene array data.
Sprr1b
Il1f6
Spink5
Krt1
Slpi
Klk12
Krt14
Dst
Dusp14
Anxa8
Serpinb2
Krt5
Dsc3
Klk10
Cst6
Mreg
Calml3
Lypd3
Klk8
Ivl
Klk7
Tgm3
Acpp
Ephx3
Tmprss11e
Sult2b1
Rab38
ALOX12
Gm2a
Krt16
Gna15
Pim1
Gja1
Tgm1
Ndufa4l2
Cryab
Scnn1b
Tiam1
Duox1
Rora
Prkch
S100a9
Fzd10
Cbr3
RASGRP1
OVOL1
KLK5
BMP7
PAK6
CPA4
SOX15
PTK6
ABHD5
IL18
DNASE1L3
LY6G6C
ANXA9

## Sheet: Sox2 target genes
Sox2 target genes
	Reference: Que J, Okubo T, Goldenring JR, Nam KT, Kurotani R, Morrisey EE, Taranova O, Pevny LH, Hogan BL. Multiple dose-dependent roles for Sox2 in the patterning and differentiation of anterior foregut endoderm. Development. 2007;134(13):2521-31.
Acvr2a
Alx4	Note: These genes are downregulated in the esophagus of sox2-/- mice according to gene array data.
Alx4
Areg
Arf1
Arf1
Artn
Asb17
Bst1
Calca
Canx
Canx
Canx
Cdc42se1
Cdh17
Ces1
Cftr
Chga
Chi3l3
Chi3l3
Chi3l3
Clca4
Cldn6
Cntnap2
Col5a1
Cyp26a1
Cyp3a13
Ddx3y
Dmbt1
Dmrt2
Eif4a2
Eif4a2
Eif4a2
Epha7
Faah
Ffar1
Foxa2
Foxe1
Foxe3
Galr2
Gja10
Gjd3
Gnrhr
Grm7
Gsk3b
Gzma
Hao2
Hcrt
Hoxa9
Hs3st1
Hsd11b2
Hsd17b2
Hsp90ab1
Ifna2
Krt71
Krt82
Krtap16-1
Krtap6-1
Lamc2
Lats1
Lce1h
Lenep
Lor
Lrmp
Mafb
Mc4r
Mertk
Mgat3
Mobp
Mrgpra1
Msi1
Myt1l
Nrxn1
Nt5e
Olfr1087
Olfr1110
Olfr1156
Olfr1240
Olfr1301
Olfr131
Olfr136
Olfr1406
Olfr378
Olfr389
Olfr424
Olfr435
Olfr446
Olfr480
Olfr488
Olfr497
Olfr502
Olfr571
Olfr702
Olfr715
Olfr767
Olfr807
Olfr916
Olfr930
Olfr943
Olfr95
Olfr978
Olfr981
Padi6
Pcbp1
Pcdhb21
Pcsk4
Pla2g7
Pparg
Prdm1
Prss42
rab5a
Rag1
Rhcg
Ror1
Rplp0
Shh
Slc13a1
Slc30a3
Sox18
Sprr2b
Sprr3
St8sia1
Syt2
Tekt1
Tg
Tgm3
Tnfrsf26
Tnmd
Trex2
Trpc4
Trpc4
Tsga13
Ubl4
Ucp1
Vmn1r17
Vmn1r225
Vmn1r30
Wfdc5
Zfp263
Zfp316
Zfp46

## Sheet: Pax9 target genes
Pax9 target genes
	Reference: Jonker L, Kist R, Aw A, Wappler I, Peters H. Pax9 is required for filiform papilla development and suppresses skin-specific differentiation of the mammalian tongue epithelium. Mech Dev. 2004 Nov;121(11):1313-22.
Calm4
Crct1	Note: These genes are downregulated in the tongue of pax9-/- mice according to gene array data.
gja1
Krt1
Krt10
Krt2
Krt23
Krt31
Krt34
Krt35
Krt36
Krt5
Krt84
Krt85
Krtap13
Krtap3-2
Krtap3-3
Lce1h
Lce3c
Pax9
Sbsn
Scel
Sprr1a

## Sheet: Nrf2 Keap1 pathway genes
Nrf2/Keap1 target genes
	Reference: Malhotra D, Portales-Casamar E, Singh A, Srivastava S, Arenillas D, Happel C, Shyr C, Wakabayashi N, Kensler TW, Wasserman WW, Biswal S. Global mapping of binding sites for Nrf2 identifies novel targets in cell survival response through ChIP-Seq profiling and network analysis. Nucleic Acids Res. 2010;38(17):5718-34..
Abcc1
ABCC2	Note: These genes are identified in the mouse embryonic fibroblast using the technique of Chip-Seq.
ABCC3
Abcc5
Acap2
Adam23
Adcy1
Ado
Ahr
Akap7
Akr1a4
AKR1B8
Als2
Ankrd44
Anxa1
Aox1
Appl2
Arhgap18
Arhgdib
Asb3
Atg16l2
B3gnt2
Bbs9
BC067068
Bet1
Blvrb
Bmp8a
Bmper
Bmpr1a
Cabc1
Capn7
Cat
Cbara1
Cbr3
Ccdc104
Ccdc109b
Ccdc53
Ccdc90b
Cd302
Cdh11
Cdk19
Cdkn2b
Chd7
Chpt1
Clcn1
Cln5
Cltc
Col4a1
Commd6
Coro7
Cox6c
Cpne8
Cpt1a
Cr1l
Ctsb
Ctso
Cxcl5
Daam2
Daglb
Dcaf6
Dcn
Ddc
Dennd4c
Dhx40
Dhx57
Dlx2
Ecm1
Enc1
Entpd5
Ephx1
Fam102a
Fam69a
Fbf1
Fbxl3
Fkbpl
Fnbp1
Foxa2
Frmd6
Fth1
Fth1
Ftl1
Ftl2
Fuk
Fzd6
G6pdx
Gabarapl1
Gas1
Gclc
GCLM
GCLM
Gdi2
Gli2
Golim4
Gpcpd1
GPx1
GPx2
Grip2
Grm1
GSR
GSTA1
GSTA2
GSTA3
Gsta4
Gstm1
Gstm2
Gstm3
GSTM4
GSTM5
GSTM6
Gvin1
Hace1
Hbp1
Hdc
Hes1
Hint3
Hmox1
Hrsp12
Idh1
Ifit3
Igf1
Il33
Insig2
Itgb2
Jag1
Kcnab1
Kdelr2
keap1
Kif26b
Klhdc8a
Kras
Laptm4b
Layn
Lbh
Lmf1
Lnx1
Lpl
Lrrc4c
Lypd6b
Lyplal1
Macf1
Maff
Magohb
Mamdc2
Map3k9
Mapk8
Matn2
Mcoln2
Mdfic
Megf9
Meis1
Mfsd9
Mgst2
MGST3
Mlycd
Mmd
Mrpl14
Mrpl33
Mt2
Neto2
Nfe2l2
Npnt
Nqo1
Oat
Oit3
Paip1
Pbx1
Pcdh7
Pddc1
Pdgfc
Pdia4
Pgap1
Phlda1
Pion
Pla2g4a
Pln
Ppp1r12b
Pqlc3
Prdx1
PRDX6
Prkar2b
Prkcd
Prr13
Psma1
Psma4
Psma5
Psma6
Psma7
Psmb1
Psmb2
Psmb3
Psmb4
Psmb5
Psmb6
Psmc1
Psmc3
Psmd1
Psmd11
Psmd12
Psmd13
Psmd5
Psmd7
Pspc1
Ptcd1
Ptgr1
Pttg1ip
Rab32
Rgs10
Rnd3
Rnf141
Rnf216
Rpl10a
Rps6
Rxra
Scamp1
Scpep1
Scyl1
Sdccag8
Sdpr
Sec63
Sema3e
Sema6d
Serpine1
Sh3rf2
Sik2
Sim2
Slc16a9
Slc39a10
Slc44a3
Slmap
Snx1
Snx13
Snx22
Snx4
Soat1
Socs5
SOD1
SOD2
SOD3
Speer3
Speer4a
Spred1
Sqrdl
Srp9
Srxn1
Ssr3
Sub1
Synpo2
Tbc1d23
Tbce
Tbcel
Tfpi
Tgfb2
Tkt
Tmeff2
Tmem159
Tmem206
Tmem63a
Tmem64
Tmtc2
Tspan3
Txlnb
Txn1
Txndc5
Txnrd1
Ube2v2
Ugt1a6b
UGT2B1
UGT2B5
Vasn
Vps8
Wapal
Wasf1
Wdr81
Wdsub1
Wnt5a
Yaf2
Ypel5
Zc3h11a
Zdhhc20
Zfand2b
Zfp51
Zmat4

## Sheet: EDC genes
EDC genes
	Reference: de Guzman Strong C, Conlan S, Deming CB, Cheng J, Sears KE, Segre JA. A milieu of regulatory elements in the epidermal differentiation complex syntenic block: implications for atopic dermatitis and psoriasis. Hum Mol Genet. 2010;19(8):1453-60
Crct1
Flg
FLG2
Hrnr
Ivl
Kprp
Lce1a1
Lce1a2
Lce1b
Lce1c
Lce1d
Lce1e
Lce1f
Lce1g
Lce1h
Lce1i
Lce1l
Lce1m
Lce3c
Lce3f
Lor
Pglyrp3
Rptn
S100a1
S100a10
S100a11
S100a13
S100a14
S100a16
S100a3
S100a4
S100a5
S100a6
S100a7a
S100a8
S100a9
Smcp
Sprr1a
Sprr1b
Sprr2a1
Sprr2b
Sprr2c
Sprr2d
Sprr2e
Sprr2f
Sprr2g
Sprr2h
Sprr2j-ps
Sprr2k
Sprr3
Sprr4
Tchh
Tchhl1

## Sheet: Skin epithelial layers
Epithelial layers	Genes	References
basal lamina	AGRN	Yurchenco PD, Patton BL. Developmental and pathogenic mechanisms of basement membrane assembly. Curr Pharm Des. 2009;15(12):1277-94.
	B4galt1	Candi E, Schmidt R, Melino G. The cornified envelope: a model of cell death in the skin. Nat Rev Mol Cell Biol. 2005 Apr;6(4):328-40.
	CD44	Koster MI, Roop DR. Mechanisms regulating epithelial stratification. Annu Rev Cell Dev Biol. 2007;23:93-113
	Col11a1	Mack JA, Anand S, Maytin EV. Proliferation and cornification during development of the mammalian epidermis. Birth Defects Res C Embryo Today. 2005 Dec;75(4):314-29.
	Col14a1
	Col16a1
	Col17a1
	Col19a1
	Col1a1
	Col22a1
	Col25a1
	Col3a1
	Col4a1
	Col4a5
	Col4a6
	Col5a3
	Col6a2
	Col6a3
	Col7a1
	Col8a1
	DAG1
	HSPG2
	Itga1
	Itga9
	Itgam
	Itgav
	Itgb1
	Itgb1bp2
	Itgb3
	Itgb4
	Itgb6
	Lama5
	Lamb3
	Lamc2
	Lamp2
	Lgals12
	Lgals3
	Lgals7
	NID1
	NID2
Basal layer	Ywhae
	Jun
	Tcfap2a
	Dst
	Col17a1
	Cdkn1a
	Ets1
	Ets2
	Krt1
	Krt14
	Krt5
	Notch1
	Notch2
	Notch3
	Notch4
Spinous layer	Tcfap2c
	Tgm2
	Trp63
	Ywhae
	Chuk
	Myc
	Dsg2
	Dsg3
	Dsg4
	IRF6
	Krt5
Granulous layer	Ovol1
	Tgm5
	Trp63
	Cdsn
	Dsc1
	Dsg1a
	Dsg1b
	Dsg1c
	Evpl
	FLG
	KRT1
	KRT10
	Krt2
	KRT9
	LOR
	Pkp1
Keratinized layer	Ppl
	PRKCA
	PRKCB
	TGM3
	TGM5
	cdh1
	Flg
	Gjb2
	Ivl
	KLF4
	Lor
	S100a11
	S100a14
	S100a7a
	S100a16
	S100a3
	Sprr1a
	Sprr2a1
	Sprr2b
	Sprr2d
	Sprr2e
	Sprr2f
	Sprr2h
	Sprr2j-ps
	Sprr2k
	Sprr3
	Lce3c
	Lce1a2
	Lce1a1
	Lce1b
	Lce1h
	Tchh
	Tgm1
