# Supplementary material for: Transcript Profiling Identifies Dynamic Gene Expression Patterns and an Important Role for Nrf2/Keap1 Pathway in the Developing Mouse Esophagus
Source: PLoS One. 2012 May 2;7(5):e36504. doi: 10.1371/journal.pone.0036504 (PMC3342176; doi:10.1371/journal.pone.0036504)
Supplement: Excel S2 — Differential gene expression in the specification phase during wild-type mouse esophageal development: (1) Raw gene expression array data after data pre-processing (E8.25 endoderm and E11.5 esophagus); (2) SAM analysis of differentially expressed genes (E8.25 endoderm vs E11.5 esophagus); (3) GSA analysis of differentially expressed gene sets (E8.25 endoderm vs E11.5 esophagus); (4) Fisher's exact test of knowledge-based gene sets (E8.25 endoderm vs E11.5 esophagus). (XLSX) [file pone.0036504.s008.xlsx]

## Sheet: Ill_logRatio_entrezID-ra
EntrezID	Illumina_DE_GSM326633	Illumina_DE_GSM326634	Illumina_DE_GSM326635	Illumina_ES_GSM326642	Illumina_ES_GSM326643	Illumina_ES_GSM326644
100017	-0.351784	-0.127653	-0.673125	0.672835	0.170654	0.0629617
100019	0.701312	0.666732	0.909597	-1.17218	-1.29759	-1.12933
100034361	-0.0522044	-0.268017	0.217089	0.0344345	0.0813121	-0.0427945
100037258	0.419728	0.113713	0.242921	-0.411329	-0.39774	-0.101527
100087	-0.479841	-0.150744	0.113777	0.0263627	0.246867	0.163296
100102	0.445496	0.479126	0.507245	-0.737455	-0.232145	-0.947125
100121	0.993191	-0.0314051	0.628057	-0.612556	-0.808153	-0.892151
100169	-0.552759	-0.328669	-0.658903	0.420243	0.389864	0.422973
100182	0.345237	0.265663	0.156791	-0.0778687	-0.263494	-0.564402
100198	-0.612653	-0.0777124	-0.778396	0.580957	0.351422	0.201877
100201	-0.124971	-0.0367984	-0.0430192	0.158202	0.078506	-0.0439456
100206	0.466461	0.381435	0.165293	-0.359658	-0.325061	-0.537694
100210	-0.537179	-0.34579	-0.146367	-0.25392	-0.116196	1.03321
100226	0.0850066	0.00733757	-0.180065	-0.0074512	0.122818	-0.0406444
100273	-0.20226	-0.0859145	-0.243178	0.210017	0.145293	0.132275
100317	0.0661051	0.373366	-0.0198958	-0.139311	-0.179836	-0.151385
100336	-0.119894	-0.2952	-0.121524	-0.012238	0.258762	0.235038
100340	-0.812196	-0.473987	-0.938998	0.228758	0.920742	0.435618
100383	-0.167965	0.0613538	-0.0244105	0.313671	0.0343041	-0.263541
100494	-0.0395758	0.0538663	-0.0017474	0.00952755	-0.0923586	0.0662549
100532	0.224823	0.554321	0.177925	-0.248674	-0.37902	-0.530099
100561	0.33148	-0.112891	0.215165	-0.138738	-0.26164	-0.173783
100608	0.462768	0.243994	0.241835	-0.465326	-0.234739	-0.430463
100609	0.349075	0.199892	0.273831	-0.443879	-0.251311	-0.289113
100689	-1.52049	-1.48898	-1.62246	0.67343	1.03988	0.916856
100715	-0.117613	-0.20651	-0.536199	-0.0585232	-0.232487	0.878555
100737	-0.0118025	-0.143303	-0.0319787	0.314807	-0.0578999	-0.107567
100756	0.161652	0.360377	-0.159176	-0.043131	0.00522939	-0.404576
100763	0.14579	0.131562	0.283577	-0.0650024	-0.272911	-0.287447
100764	-0.0111633	-0.0458162	0.0160717	0.0888711	0.0483113	-0.109938
100929	0.441621	0.102416	0.662921	-0.533549	-0.434112	-0.595796
100952	0.0253076	-0.263679	-0.0819701	0.470761	-0.240127	0.00683809
100972	-0.664865	-0.420845	-0.595116	0.39418	0.544292	0.381932
100986	0.0473943	-0.180392	0.037125	-0.00270791	-0.0960825	0.153097
101023	-0.0318537	0.151799	-0.0776453	0.143176	0.126447	-0.355993
101095	-0.276605	-0.389128	-0.514541	0.38319	0.381347	0.224788
101113	-0.198836	-0.140261	-0.225937	-0.0187884	0.415239	0.100417
101118	-0.178212	-0.420243	-0.120866	0.12024	0.328447	-0.078551
101142	-0.154738	0.348498	-0.445713	0.0126981	0.126726	0.0300377
101148	-0.882057	-0.504199	-0.652492	0.403321	0.761632	0.351034
101197	-0.335996	-0.248596	-0.214596	0.449403	0.289991	-0.0583447
101206	0.233278	-0.151668	-0.0134098	-0.116312	-0.0737069	-0.00205208
101214	-0.203924	-0.446684	-0.227415	0.0246191	0.146918	0.560995
101314	-0.18343	-0.222121	-0.359706	0.103607	0.306428	0.261201
101358	0.470522	0.49212	0.203545	-0.526377	-0.645779	-0.284991
101437	0.359235	0.267036	0.520445	-0.502476	-0.475025	-0.428009
101471	-0.0408432	0.188644	-0.0462708	0.0180787	0.0238784	-0.158634
101490	-0.161841	-0.180301	-0.0268023	-0.169387	0.036803	0.436243
101497	0.373009	0.333448	0.0880131	-0.215294	-0.40569	-0.33366
101502	-0.242006	-0.177051	-0.269491	0.327589	0.0621321	0.222164
101513	0.0352127	-0.0065024	-0.123231	0.175727	0.0878054	-0.190026
101540	-0.58689	-0.746141	-0.869981	0.651673	0.722862	0.23064
101543	0.180135	0.169267	-0.267236	-0.0925914	0.0439391	-0.0674413
101565	-0.073196	0.141495	0.0439285	0.00408684	0.0412345	-0.192356
101568	0.239258	0.417667	0.269473	-0.320881	-0.360248	-0.406399
101592	0.436843	-0.11393	-0.0627046	-0.0875907	-0.407279	0.142088
101602	-0.108635	-0.560765	0.138868	0.662068	0.4618	-1.06403
101604	-0.164036	-0.24078	-0.0935103	0.192697	0.211359	0.0531634
101612	0.779992	-0.0848973	0.381052	-0.834902	-0.424346	-0.237953
101631	0.010582	0.125598	-0.269846	0.170193	0.0615278	-0.129772
101706	0.0849633	-0.117577	-0.20016	0.0638446	-0.224199	0.339658
101739	0.295645	0.147401	0.294837	-0.390492	-0.364183	-0.102559
101831	0.486804	0.219428	0.193392	-0.340983	-0.330493	-0.402459
101861	0.441816	0.240149	0.246356	-0.32774	-0.3901	-0.374228
101867	-0.752127	-0.636797	-0.288995	0.293389	0.284484	0.709822
101869	0.379702	0.222678	0.0228348	-0.218406	-0.0668824	-0.443923
101943	0.338166	-0.0138459	0.22715	-0.428638	-0.404358	0.158738
101966	0.270494	-0.0983793	-0.283969	-0.300443	-0.017297	0.343692
101985	0.0345634	-0.230329	-0.144185	0.0951027	0.0512722	0.167232
101994	0.354715	0.0735559	0.0824868	-0.128023	-0.186907	-0.254702
102032	-1.10677	-0.666654	-1.09989	0.464158	0.521567	0.948469
102058	-0.0778516	0.127135	-0.198975	0.126518	0.105714	-0.105608
102093	-0.378542	-0.179055	-0.38512	0.71126	0.181987	-0.156658
102098	-0.0310575	0.00579914	-0.165093	0.293913	-0.0951198	-0.0375576
102103	-0.824257	-0.474141	-0.909183	1.00329	0.398405	0.149963
102122	0.28851	0.0971784	0.0626248	-0.22948	-0.0630057	-0.205134
102124	0.0502444	0.279436	0.181506	-0.405975	-0.0860945	-0.0861261
102141	0.203287	-0.0463724	-0.0814352	-0.400312	0.333911	-0.0845952
102162	-0.0940191	0.26619	-0.0541794	-0.0329472	0.244178	-0.398406
102193	0.270884	0.161888	0.217579	-0.177752	-0.226259	-0.323192
102247	0.567973	0.0724584	0.223737	-0.298021	-0.370035	-0.379937
102323	0.225292	-0.0103605	-0.044893	0.125931	-0.128637	-0.195927
102334	-1.24569	-0.814512	-0.620457	0.518239	0.730203	0.604726
102339	0.408221	0.182208	0.107752	-0.196423	-0.165763	-0.445138
102371	-0.245661	0.362616	-0.441035	0.298886	-0.0363125	-0.0484985
102414	0.286888	-0.0140756	0.0283437	-0.221372	-0.0754484	-0.036637
102436	-0.0568783	-0.335681	-0.176159	0.267058	0.127916	0.116773
102462	-0.101934	-0.162372	-0.0610283	-0.0433263	0.11422	0.2294
102545	-0.0143582	-0.134772	-0.523086	-0.172226	0.239961	0.415236
102566	0.0395094	-0.0820741	-0.327027	0.21041	0.243923	-0.139549
102570	-0.067949	0.321917	-0.258366	-0.211403	0.267852	-0.123058
102580	0.0691232	-0.143262	0.157682	-0.222829	-0.218501	0.264967
102595	0.0806957	-0.0894048	-0.111106	0.0273437	0.119454	-0.0369705
102614	0.420932	0.431398	0.62522	-1.05563	-0.196016	-0.781824
102626	-1.21371	-1.50714	-1.14688	0.938033	0.963128	0.449146
102644	0.576963	-0.0866586	0.121987	-0.269949	-0.174346	-0.295096
102657	0.371796	0.325893	0.221156	-0.186669	-0.44826	-0.45134
102693	0.188685	0.352778	0.188258	-0.282287	-0.360781	-0.197034
102747	-0.0803575	-0.211306	-0.224828	0.215056	0.300099	-0.0716547
102774	-0.411521	-0.212253	-0.291051	0.347181	0.357276	0.082958
102791	0.218204	0.206086	0.331963	-0.0590273	-0.302955	-0.523856
102857	-0.936832	-0.925876	-0.861244	0.773777	0.586342	0.539569
102866	0.093756	-0.168652	0.538269	-0.0616573	0.136738	-0.740393
102871	-0.321082	0.469845	-0.279123	-0.130674	-0.0276879	0.183712
102920	-0.0412334	0.342183	0.135814	-0.146514	-0.292118	-0.0552722
102954	0.0186387	0.450868	0.22231	-0.444889	-0.257334	-0.111364
103080	-0.558778	-0.283927	-0.402953	0.402431	0.596366	0.00057442
103135	-0.0771187	-0.0358004	0.000788223	0.0978904	-0.00183354	0.00442913
103140	-0.835203	-0.777037	-1.22574	1.08746	1.13711	-0.662762
103172	0.225181	-0.0384127	0.0701257	0.00270238	-0.114303	-0.168085
103220	0.486101	0.314147	0.147334	-0.387598	-0.163883	-0.599484
103236	0.0199811	0.0746613	0.112988	-0.174075	-0.148073	0.0653525
103266	-0.359738	-0.339566	-0.45168	0.426979	0.213938	0.329974
103268	0.164257	0.00880745	0.341077	-0.288463	-0.390213	0.0764294
103284	-0.0793758	-0.0267854	0.169498	-0.0293832	-0.0304411	-0.0122718
103406	-0.365486	-0.0860534	-0.144128	0.0839101	0.109835	0.334625
103468	0.591498	0.591158	0.518136	-0.739988	-0.876485	-0.708213
103534	0.12171	0.435534	0.271247	-0.402753	-0.60937	-0.0002471
103537	-0.446368	-0.260874	-0.0401484	0.366281	0.294227	-0.0255555
103551	0.720556	0.428051	0.826062	-1.08199	-1.00293	-0.827619
103554	0.269275	0.08789	0.331041	-0.307243	-0.417315	-0.0876434
103573	0.170509	0.0833842	0.418511	-0.0579783	-0.311437	-0.449269
103677	0.264683	-0.0168669	-0.0635214	-0.0748621	0.0505321	-0.187248
103694	0.104547	-0.110774	-0.0128188	-0.376137	-0.520731	0.627914
103711	0.023426	0.170446	0.0783783	0.248297	-0.0941583	-0.508892
103712	-1.85427	-1.83146	-2.07375	0.898195	0.840698	1.19294
103724	0.197851	0.0455395	-0.0202682	-0.123968	-0.0192564	-0.110106
103733	0.381319	0.115783	-0.031217	-0.473652	0.0989791	-0.189351
103742	0.355834	0.0774299	-0.143315	-0.266011	-0.0299414	-0.0466165
103743	-1.04185	-1.22804	-1.29584	0.571285	0.849065	0.837669
103765	-0.905281	-0.351504	-0.669277	0.530115	0.444672	0.481125
103768	-0.720902	-0.367754	-0.789671	0.57468	0.65729	0.178795
103806	-0.22001	0.0780251	0.127037	0.317513	-0.230518	-0.127732
103836	-0.320808	-0.123003	-0.0814984	-0.0006408	0.338054	0.128922
103841	-0.868504	-0.388179	-0.952079	0.648541	0.737795	0.194361
103850	-0.287203	-0.354822	-0.292847	0.173422	0.426773	0.189998
103889	-0.613371	0.0911002	-0.588131	0.220489	0.288232	0.375997
104001	0.0819957	1.28741	0.0202563	-1.05357	-0.498861	-0.600751
104086	0.412838	0.0436488	0.11429	-0.0869553	-0.320696	-0.245421
104099	-0.266916	0.175004	-0.501961	0.639154	0.292623	-0.618661
104112	-0.292053	-0.307551	-0.298716	0.227418	0.283619	0.277363
104130	-0.292622	-0.648925	-0.37912	0.00565799	0.117103	0.870623
104156	0.670358	0.863877	1.11356	-1.3942	-1.58181	-1.7447
104158	-0.517288	-0.154916	-0.266161	0.675269	-0.156168	0.213871
104174	0.937393	1.2872	0.995854	-2.50032	-2.55782	-2.17335
104184	0.407172	0.246633	0.247556	-0.393621	-0.323759	-0.335564
104252	0.223889	-0.0626075	0.200556	0.318075	-0.122719	-0.719761
104263	-0.349842	-0.119463	0.0291816	0.209976	-0.0681087	0.203736
104303	-0.347595	-0.340929	-0.447859	0.231931	0.411883	0.3179
104318	0.0940052	0.161153	-0.038455	-0.185918	-0.278015	-0.0326836
104346	0.321725	0.307321	0.142785	-0.365706	-0.0351195	-0.510755
104349	0.146253	-0.0996425	0.140845	-0.0811768	-0.0803137	-0.0412344
104367	0.0166586	-0.151603	-0.0479687	0.00919116	0.0569314	0.10748
104383	-0.0235943	-0.138324	-0.266743	-0.10732	0.141446	0.339501
104394	0.136116	0.196272	0.188035	-0.0923139	0.0414077	-0.563993
104416	0.275036	0.365547	0.219313	-0.273949	-0.330948	-0.391658
104418	0.249014	-0.031187	0.0523095	-0.0943747	-0.21032	-0.000474597
104444	-0.131528	-0.238413	-0.177687	0.00387669	0.134905	0.351475
104457	0.319865	-0.280016	-0.15386	-0.210105	-0.0931488	0.332105
104458	0.597104	0.116868	0.666414	-0.736065	-0.755265	-0.359088
104479	0.329624	-0.01723	0.511906	-0.200184	-0.429937	-0.36171
104570	-0.799621	-0.329429	-0.506721	0.485696	0.483388	0.311422
104601	0.33428	0.514673	0.103817	-0.174582	-0.473437	-0.511346
104662	-0.09256	0.248352	0.509557	-0.156003	-0.347076	-0.292048
104681	-0.0283789	0.383616	0.633734	-0.458238	-0.176928	-0.623601
104721	0.386179	0.237868	0.474352	-0.507648	-0.440422	-0.39224
104725	-1.1054	-0.920363	-0.700681	0.299859	0.959236	0.597021
104732	0.493536	0.680454	-0.146182	-0.126205	-0.294298	-1.02649
104759	-0.0415776	-0.282152	-0.313631	0.176552	0.308967	0.0799828
104771	-0.373294	-0.279347	-0.103208	-0.123012	-0.0345633	0.630484
104776	-1.82457	-1.43952	-1.33257	1.00694	0.795913	0.811962
104799	0.360753	0.0305417	0.365596	-0.151179	-0.171933	-0.583346
104859	-0.0898083	0.160893	-0.0619487	-0.0886757	0.240318	-0.193399
104871	0.01583	0.0781461	0.0712939	-0.125692	-0.206611	0.143975
104884	0.127077	0.272779	0.345171	-0.249197	-0.343485	-0.257315
104886	-0.690058	-0.560101	-0.740434	0.482583	0.693103	0.32724
104910	-0.0339176	0.299205	0.0264282	-0.163778	-0.179597	0.0166768
104943	-0.388927	-0.437244	-0.46546	0.536653	0.457043	0.054637
105005	-0.254146	-0.468486	0.0220348	0.160133	0.526243	-0.124572
105014	-0.926484	-1.27613	-1.2606	0.450214	0.433979	1.2571
105083	0.211824	0.564159	0.414644	-0.53121	-0.503475	-0.445955
105148	0.167683	0.282481	0.487187	-0.291822	-0.318588	-0.519323
105171	-1.0823	-0.122668	-0.587828	0.817582	0.345311	0.113061
105203	0.295196	0.498859	0.566862	-0.449652	-0.799258	-0.508865
105239	0.111391	0.181435	0.137503	-0.0629272	-0.254169	-0.148864
105245	0.759824	0.48297	0.299005	-0.610443	-0.667766	-0.793618
105246	0.233108	0.155252	0.0191566	-0.024145	-0.114233	-0.312818
105278	0.013033	0.0183286	0.0706522	-0.00238994	0.0265457	-0.149085
105298	0.309814	0.448592	0.665165	-0.679629	-0.49317	-0.683816
105348	0.783383	0.811472	0.714435	-1.26168	-1.03891	-1.38823
105352	0.317796	0.273015	0.130422	-0.0668046	-0.101588	-0.712516
105428	0.434343	-0.0583246	0.084229	-0.575543	-0.465649	0.36957
105440	0.0902104	0.168364	0.40727	-0.105785	-0.0942322	-0.596752
105446	0.133389	0.113519	0.026911	-0.129131	-0.0383517	-0.12117
105450	-0.0525624	0.0629369	0.149628	-0.702737	-0.269156	0.596345
105501	-0.506916	-0.532752	-0.773713	0.573441	0.355893	0.473034
105513	0.485076	0.125955	0.230572	-0.12657	-0.371281	-0.540696
105559	-2.60791	-1.90577	-2.44496	1.09901	1.19535	0.870481
105638	-0.216788	-0.285158	-0.243354	0.38468	0.211714	0.0601745
105663	-1.30358	-0.582546	-1.34259	0.797957	0.72257	0.562249
105670	-0.406014	-0.364495	-0.327907	0.326643	0.19063	0.369401
105675	-0.1169	0.0847255	-0.137879	-0.0459588	0.140918	0.0599933
105689	-0.0095564	0.0297311	0.0367954	0.0792837	-0.205876	0.0571998
105732	-0.850783	-0.347935	-0.695616	0.911368	0.560631	-0.143297
105782	0.24435	0.240146	0.203431	-0.288	-0.322301	-0.193435
105785	0.143286	0.631869	0.223552	-0.217609	-0.171141	-0.920225
105827	-0.73549	-0.425124	-0.471224	0.75089	0.343922	0.161217
105833	0.480448	0.011594	0.192947	-0.399477	-0.208872	-0.194241
105835	-0.187307	-0.209353	-0.152579	0.304528	0.297479	-0.122006
105837	-0.0279471	0.16875	0.022611	-0.187668	-0.178754	0.144009
105844	0.422858	1.37213	-0.0432939	-1.10132	-0.993339	-0.718714
105847	0.0926264	-0.201013	0.0216798	0.0254734	-0.0127898	0.061635
105988	0.254014	0.283921	0.286353	-0.315066	-0.439323	-0.197743
106014	0.842668	0.324082	0.773286	-0.749807	-0.955538	-1.17748
106021	0.1304	0.0779731	0.151741	-0.23892	-0.0396464	-0.108323
106025	-0.353838	-0.223173	0.129818	-0.01771	0.329619	0.0652095
106039	-0.276613	0.0520369	-0.0210991	0.0357618	0.0743651	0.109859
106042	0.719244	1.24601	1.21885	-2.16664	-2.49124	-2.42483
106052	-0.25305	-0.372191	-0.300942	0.353614	0.448982	-0.0196617
106064	-0.0627344	0.174477	-0.149552	0.0824301	-0.009193	-0.0507428
106068	0.212984	-0.0069763	0.213139	-0.195106	-0.216411	-0.0487575
106073	-0.0394786	0.0721669	0.182274	-0.147782	0.131238	-0.228647
106143	-0.282658	-0.226201	-0.157928	0.15696	0.0801638	0.357006
106205	-0.248227	-0.113487	-0.11207	0.339033	-0.0243957	0.0386784
106264	-0.0469463	-0.0045685	-0.14844	-0.130162	0.0264633	0.276184
106298	-0.516355	-0.124189	-0.101875	0.274559	0.345389	0.0114624
106326	-0.456057	-0.266042	0.0665044	0.228966	0.325685	0.00014203
106344	-0.186469	-0.20964	-0.212751	-0.165005	0.382712	0.285046
106347	-0.624704	-0.193719	-0.458292	0.649976	0.370367	-0.0415052
106369	0.0819714	0.304652	0.104927	-0.174161	-0.367791	-0.0129384
106389	0.113445	0.00891049	0.373043	-0.310267	0.027779	-0.289622
106522	0.965102	0.279514	1.55941	-1.54428	-2.08598	-2.12501
106529	-0.0500724	-0.195812	-0.0660516	-0.136413	0.206361	0.135765
106572	0.611213	0.728793	0.906282	-1.16477	-1.11929	-1.23733
106582	0.0822773	0.0362312	-0.228568	-0.198299	0.117191	0.159317
106583	-1.14076	-0.755668	-0.758601	0.739885	0.62981	0.483316
106585	-0.262198	-0.508333	-0.371272	0.403909	0.458308	0.0688448
106628	1.07884	0.463954	0.718581	-1.24658	-1.02492	-1.36743
106633	0.00512285	0.262973	-0.133969	-0.155862	-0.0166559	0.0124247
106639	-0.700315	-0.575048	-0.563292	0.848419	0.492235	0.0190073
106672	0.0867154	-0.0191592	0.00482308	0.10891	0.0692613	-0.273197
106707	0.10788	0.012593	-0.0992597	0.028873	-0.193087	0.125622
106722	0.118943	0.0032393	-0.31736	0.0111665	-0.108808	0.249437
106766	-0.153686	-0.329749	-0.0753566	0.113323	0.129885	0.261389
106794	-0.211296	0.314784	-0.0220885	0.147379	-0.00205	-0.28356
106795	-0.547518	-0.660992	-0.714251	0.585192	0.461926	0.427032
106821	-0.0241422	-0.200117	-0.19973	-0.423226	0.0231096	0.661756
106840	0.411349	0.306152	0.316555	-0.506365	-0.503582	-0.295737
106869	-0.721797	-0.503727	-0.505864	0.493308	0.620964	0.22865
106894	-0.28637	0.994451	-0.159773	-0.363104	-1.01953	0.303515
106947	-0.596325	-0.651988	-0.487152	0.663379	0.416422	0.26854
106952	1.03805	1.36636	0.867904	-2.20328	-2.60793	-2.80217
106957	-0.936355	-0.40079	-0.590196	0.435569	0.463933	0.557707
107029	0.598236	0.180942	1.55465	-1.39615	-1.30344	-1.47531
107035	0.0917214	0.309121	0.231035	-0.0455861	-0.418923	-0.275551
107045	0.16557	0.212783	0.45761	-0.0416346	-0.451208	-0.514372
107047	0.168176	-0.0296189	-0.0730616	-0.178923	0.115761	-0.0991658
107071	0.553033	0.22475	0.3022	-0.68279	-0.289448	-0.364538
107094	0.433904	0.364015	0.518886	-0.713889	-0.432197	-0.524471
107146	0.277796	0.106131	0.184793	-0.0521804	-0.0821037	-0.527101
107173	-0.152716	-0.232455	-0.431877	0.328326	0.344863	0.0309382
107221	0.0612572	0.217184	0.0580023	-0.112925	-0.421097	0.137764
107227	-0.758087	-0.938283	-0.680345	0.630511	0.662453	0.427144
107242	0.237819	0.471037	-0.0836734	-0.332533	-0.281078	-0.125232
107260	-0.439601	-0.432337	-0.602505	0.249534	0.2914	0.572039
107272	-0.0342924	0.115769	0.151001	-0.240918	0.252618	-0.301619
107305	-0.209658	0.0179929	-0.0682467	0.214659	0.186875	-0.179026
107328	-0.300519	-0.170846	-0.488628	0.474183	0.286799	0.0187584
107338	0.0422124	0.108615	0.139083	0.0996687	-0.239216	-0.180817
107368	-0.255662	-0.147565	0.129214	0.130026	-0.160233	0.255419
107371	0.289579	0.470114	0.23168	-0.203495	-0.341316	-0.663436
107373	0.490772	0.140331	0.0258915	-0.202076	-0.163629	-0.405186
107392	0.53822	0.253913	0.252308	-0.458818	-0.449691	-0.355194
107435	0.469285	0.355904	0.21777	-0.63054	-0.24762	-0.39415
107449	1.10226	0.949417	1.04752	-2.124	-2.55329	-1.87556
107477	0.330404	0.00506939	0.238995	-0.0163389	-0.220287	-0.429285
107503	-0.723565	-0.881367	-0.839981	0.414281	0.707497	0.634317
107508	0.477405	-0.187755	0.304616	-0.523357	-0.634541	-0.0346534
107522	0.499653	0.369945	0.155343	-0.507797	-0.348835	-0.382972
107528	-0.393121	-0.171745	-0.157428	0.448549	0.212811	-0.0446929
107566	-0.226731	0.00509204	-0.316046	-0.178234	0.00816978	0.582598
107568	0.229985	0.184091	0.225376	-0.232185	-0.160734	-0.320024
107569	0.250069	0.132298	-0.0146983	-0.13234	0.145811	-0.455251
107581	-1.38572	-0.885278	-1.01603	0.809335	1.04079	0.231566
107586	-1.171	-1.51017	-1.18456	0.572285	0.630861	1.14231
107587	-2.82153	-2.45945	-2.71728	1.25824	0.933835	1.15301
107589	-0.649416	0.103273	-0.570821	0.99728	0.473356	-1.06118
107605	0.151166	-0.175035	-0.162804	0.191448	0.538636	-0.767089
107650	0.0717175	-0.22951	0.234688	0.146954	-0.10104	-0.236118
107652	-0.656928	-0.603546	-0.279062	0.159412	0.0107288	0.954553
107684	0.300982	0.0296478	0.102578	-0.0325742	-0.255404	-0.192661
107686	-0.134915	-0.509865	-0.53057	0.0468038	0.257142	0.635215
107701	0.0482975	-0.162045	0.175336	0.0477493	-0.169711	0.0391896
107723	-1.04443	-0.943781	-1.00879	0.652886	0.56696	0.807077
107732	0.221161	0.127536	-0.124081	-0.196152	0.0882288	-0.179361
107734	-0.304693	-0.319158	-0.523629	0.154465	0.498027	0.304117
107746	0.119919	-0.120325	0.200436	-0.124402	-0.245441	0.132439
107765	0.556344	0.114233	0.624743	-0.260436	-0.722932	-0.725249
107767	0.165369	0.345006	0.149054	-0.185904	-0.240361	-0.316345
107815	-0.15871	-0.108568	0.0717877	0.143853	-0.0543928	0.0890268
107829	0.755516	0.046044	0.391373	-0.683579	-0.62492	-0.260354
107869	0.49466	-0.110917	0.533962	-0.632176	-0.613493	0.0285996
107885	0.374164	0.152086	0.0423472	-0.185252	-0.130467	-0.327596
107932	0.315052	0.135694	0.323536	-0.359424	-0.460204	-0.150402
107939	-1.05329	-0.747632	-0.678679	0.407501	0.623788	0.731962
107951	0.413256	0.195367	0.211605	-0.683882	-0.534396	0.165876
107975	-0.0361287	0.247623	-0.0804296	0.175293	-0.154884	-0.188363
107976	-0.110558	0.08928	-0.213078	-0.126282	0.123276	0.192878
107986	-0.614438	-0.662434	-0.491978	0.482415	0.313488	0.516929
107995	0.388157	0.0791839	0.0723163	-0.7141	-0.450869	0.10894
107999	0.240845	0.13313	0.127753	-0.136643	-0.174243	-0.236249
108013	-0.281609	-0.748722	-0.594052	0.586806	0.618224	0.028909
108014	0.123115	-0.115662	-0.0088506	-0.177704	0.199976	-0.0444954
108037	-0.480426	-0.343122	-0.444701	0.345986	0.729879	-0.0860664
108062	-0.0510752	0.282936	0.151042	-0.153519	-0.132088	-0.13557
108075	-2.50809	-2.84696	-2.33624	1.43624	1.58761	0.0461322
108077	-0.134407	-0.150019	0.00274803	-0.103036	-0.0719303	0.353782
108083	-0.25171	0.101086	-0.0655559	0.220673	0.160109	-0.209751
108086	0.259863	0.111232	0.224623	-0.25282	-0.100088	-0.312171
108098	-0.576033	-0.299236	-0.582713	0.196471	0.677479	0.279083
108099	-0.211628	-0.501999	-0.632761	0.397172	0.0651775	0.604743
108105	0.632777	0.894449	0.537947	-0.831146	-1.26653	-1.02597
108114	-0.0273252	0.00618485	0.0598005	-0.0198461	-0.0482018	0.0275755
108115	-0.544173	-0.309229	0.22792	1.13426	-0.799486	-0.267469
108116	0.185867	0.0647929	0.334021	-0.0608728	-0.211096	-0.415403
108123	0.160635	0.403705	0.0472555	-0.113906	-0.353235	-0.234521
108124	-0.106521	-0.325485	-0.214998	0.0808551	0.0188598	0.423549
108138	-0.61537	-0.515578	-0.546621	0.306087	0.836623	0.133657
108143	-1.39701	-1.30586	-1.13378	0.412136	0.820392	1.0189
108147	0.689769	0.180514	0.877543	-1.04944	-1.18148	-0.455824
108148	-0.374816	-0.338512	-0.362282	0.252887	0.249869	0.389559
108153	-0.13424	-0.598299	-0.244495	0.287938	0.38352	0.149449
108155	-0.289042	-0.0825964	-0.0638052	0.196313	-0.198748	0.342244
108156	0.226777	-0.0456383	-0.0207733	-0.226858	-0.113417	0.147567
108160	0.170925	-0.170275	0.136517	-0.22357	-0.0511819	0.100318
108176	-0.437491	-0.715393	0.107304	0.475716	0.354	-0.0247081
108645	0.268937	0.169726	0.322322	-0.170105	-0.391902	-0.309918
108652	-0.109794	-0.0396001	-0.0645049	0.060375	-0.0191071	0.118427
108655	-0.987475	-0.959626	-1.17827	0.931831	0.661208	0.474588
108657	-0.172875	-0.230886	-0.346013	0.152679	0.150186	0.359809
108664	0.285119	0.271998	0.150226	-0.347369	-0.264944	-0.187904
108672	0.661658	0.412571	0.72633	-0.747687	-0.734476	-1.06861
108673	0.342832	0.335528	0.385411	-0.576151	-0.385043	-0.321917
108679	-2.22562	-1.86748	2.33151	-1.25007	-1.2462	0.737348
108682	-0.196304	-0.187545	-0.251489	0.173857	0.122526	0.27898
108686	0.128644	-0.119818	-0.210596	0.00894993	0.130955	0.040228
108687	0.30593	0.180362	0.094908	-0.0539278	-0.159667	-0.472247
108689	0.470078	0.299349	0.0853191	-0.225464	-0.321055	-0.466612
108705	0.110903	0.00708076	-0.44542	0.0577895	0.10481	0.111313
108707	0.252538	0.141912	0.240417	-0.43899	-0.192455	-0.100008
108735	-0.309339	0.0204894	-0.200499	0.257674	0.346086	-0.221982
108737	0.406845	0.459775	0.341062	-0.539395	-0.523414	-0.427668
108755	-0.699306	-0.629501	-0.776816	0.385601	0.741933	0.439734
108837	0.139087	0.107773	0.227724	-0.197437	0.138878	-0.505757
108853	-0.666393	-0.619036	-0.186848	0.374124	0.484075	0.312728
108888	0.536522	0.492812	0.145519	-0.542333	-0.453006	-0.470544
108897	0.143516	0.441764	0.204132	-0.281935	-0.554919	-0.10184
108899	-0.82355	-1.02477	-0.599002	0.544329	0.88232	0.296129
108903	-0.311075	-0.200171	-0.0542369	0.294507	0.389529	-0.217028
108907	-0.111661	-0.258878	-0.114668	-0.0220734	0.205475	0.209466
108909	0.489483	0.404534	0.187442	-0.451175	-0.454959	-0.407847
108911	0.458753	0.00346425	0.347179	-0.386334	-0.327425	-0.245042
108912	0.28483	0.327093	0.381687	-0.577166	-0.33161	-0.279621
108927	-1.64745	-1.00698	-1.49401	1.08898	0.940804	0.376373
108943	0.37758	0.574667	0.387647	-0.585862	-0.684736	-0.438188
108946	0.0408208	0.109961	0.291719	-0.329784	-0.380477	0.0557848
108954	0.386015	0.163498	0.566724	-0.480934	-0.44873	-0.444852
108958	-0.293234	0.177426	-0.18698	0.301218	0.0440733	-0.101402
108960	0.133766	0.705404	0.19843	-0.136586	-0.310434	-0.940435
108989	0.577988	0.525124	0.0335813	-0.428364	-0.554675	-0.453511
109006	0.504067	0.138282	0.608378	-0.614329	-0.475037	-0.503674
109019	0.835806	0.452373	0.938738	-1.10709	-1.19089	-1.21263
109042	-0.978627	-0.560001	-0.975813	0.654168	0.854928	0.239955
109054	-0.0385564	0.0297397	-0.146663	-0.158717	0.20869	0.0825189
109065	0.156591	-0.127748	-0.0633941	-0.296849	-0.191464	0.438792
109075	-0.135113	0.150113	-0.251275	0.0455232	0.147094	0.0143062
109077	0.0907517	0.154608	0.205902	-0.393287	-0.228686	0.10411
109079	-0.466796	-0.279371	-0.319888	0.489182	0.173426	0.237236
109082	0.327906	0.394503	0.0194458	-0.311817	-0.200417	-0.350445
109093	0.362817	0.182662	0.235079	-0.319828	-0.234204	-0.349372
109108	-0.224442	0.162317	-0.0408899	0.10942	-0.0122557	-0.0150178
109113	0.00836763	0.00177436	-0.00629998	-0.195245	-0.194363	0.196778
109115	0.172394	0.092037	-0.0179284	-0.16546	0.0625224	-0.166004
109129	-0.264366	-0.707253	-0.630324	-0.230813	-0.30897	1.42306
109135	-0.763729	-0.776563	0.0321112	0.524638	0.483273	0.118285
109145	0.308671	0.288346	0.121213	-0.446995	-0.23875	-0.139944
109154	0.0820001	0.138576	0.140206	-0.0156275	-0.109374	-0.301193
109161	-0.381551	-0.202742	-0.109144	0.330998	0.00165161	0.249642
109163	-0.828665	-0.597454	-0.743837	0.464042	0.593456	0.556658
109168	0.0477931	0.226687	0.258575	-0.0622527	-0.161267	-0.442763
109212	0.221725	0.222424	0.114491	-0.489487	-0.0234199	-0.129273
109229	-0.301409	-0.448062	0.29142	0.0947007	0.290359	-0.0345735
109232	0.295594	0.268709	0.347679	-0.45132	-0.308759	-0.30609
109241	-0.159561	-0.176131	-0.425774	0.431287	0.194694	0.0290442
109242	0.463956	0.36825	0.114614	-0.649613	-0.261102	-0.243703
109270	0.232915	0.585938	0.00261279	-0.311893	-0.191309	-0.49776
109275	0.509828	-0.109743	0.330056	-0.284209	-0.41454	-0.198111
109280	0.312016	-0.141212	0.358666	-0.351049	-0.0641559	-0.210782
109294	0.47002	0.640747	0.300945	-0.718284	-0.383883	-0.748351
109305	0.328226	0.392187	0.070241	-0.362266	-0.258362	-0.297442
109331	-1.14861	-0.872544	-0.761965	0.452127	0.766755	0.694762
109332	-0.0358027	0.113079	-0.164831	0.186936	-0.0555348	-0.0631083
109333	0.323084	0.226879	0.276928	-0.345937	-0.298076	-0.315636
109359	0.21791	0.417904	0.0505205	-0.158654	-0.200907	-0.437438
109552	-0.519008	-0.32467	-0.457109	-0.0557786	0.159553	0.822666
109624	-0.194433	-0.402437	-0.281986	0.494768	0.0352283	0.0730775
109637	0.318492	1.136	0.228777	-0.716085	-0.905564	-0.845177
109652	0.0636444	0.0360828	-0.0056922	-0.144873	0.0716143	-0.0282034
109660	0.459038	0.396499	0.496552	-0.588294	-0.327071	-0.83243
109672	-0.800563	-0.745412	-0.580775	0.378232	0.956935	0.196866
109674	0.542264	0.612735	0.113122	-0.7998	-0.384911	-0.465397
109676	0.306146	0.0237983	0.463106	0.200997	-0.618669	-0.708082
109711	0.333294	0.778938	0.498716	-0.732863	-0.637602	-0.822745
109731	-0.112225	0.503765	0.165125	0.206658	-0.389536	-0.55556
109754	-0.783075	-0.707395	-0.875397	0.473985	0.398004	0.53974
109778	-1.52168	-1.65327	-1.52344	0.773187	1.11809	0.756954
109785	0.214594	0.296282	0.221053	-0.213143	-0.166415	-0.45895
109801	0.00542354	0.0110967	0.188989	-0.154377	-0.0483178	-0.0172444
109815	0.348099	0.238753	0.233219	-0.316572	-0.203692	-0.447152
109857	-2.98277	-2.89278	-2.92122	1.17569	1.5556	0.674215
109889	0.432137	0.0821012	0.135383	-0.242246	0.00111313	-0.535397
109910	0.195634	-0.210342	-0.128615	-0.285311	-0.256849	0.55614
109934	-0.0571812	0.297107	0.0969458	0.0270428	-0.282602	-0.126919
110006	0.434078	0.257404	0.281762	-0.551481	-0.649266	-0.0303197
110012	0.319834	0.0762611	0.165067	-0.19654	-0.517457	0.052057
110033	0.559846	0.597261	0.244925	-0.794865	-0.524915	-0.511675
110052	-0.76838	-0.736802	-0.325149	0.354408	0.605794	0.413751
110078	-0.179991	-0.765947	-0.0791052	0.361635	0.19238	0.277001
110094	0.196494	0.115242	0.261212	-0.0198834	-0.247059	-0.39479
110095	0.700245	0.734673	0.615507	-0.851613	-0.793722	-1.49604
110109	0.565278	0.331618	0.778581	-0.842095	-0.712668	-0.824676
110147	0.0705602	0.119975	0.118785	0.0432944	-0.266075	-0.118911
110157	0.276477	0.215116	0.188865	-0.380568	-0.655638	0.183623
110172	-0.184711	0.0305737	-0.0168518	0.00928866	0.0704357	0.0703303
110173	-0.511882	-0.349697	-0.405132	0.304481	0.368914	0.306683
110187	0.203184	0.0238567	0.292012	-0.109451	-0.311949	-0.157888
110196	0.160987	-0.201056	-0.15622	-0.174562	0.204642	0.124986
110197	0.0332553	0.171083	0.0264056	0.073003	-0.141541	-0.182915
110198	-0.186555	0.0877174	-0.487803	0.0289391	0.142657	0.319406
110208	0.465212	0.187038	0.400752	-0.453313	-0.504261	-0.317975
110213	0.692189	0.561248	0.287576	-0.758899	-0.693304	-0.60908
110253	0.422206	0.572081	0.409541	-0.591457	-0.719064	-0.50127
110310	-1.43178	-0.426016	-1.54165	0.808564	0.899376	0.375522
110323	-0.398182	-0.645675	-0.790282	0.121545	0.522822	0.632234
110355	0.400804	0.212888	0.441539	-0.348962	-0.544136	-0.382704
110379	0.213874	0.175842	0.178355	-0.258736	-0.021754	-0.356958
110382	0.105148	-0.139707	-0.385887	0.129763	0.257966	-0.0275069
110391	0.226381	-0.322604	-0.109317	0.020983	0.522753	-0.495953
110417	-0.113737	-0.389041	-0.0935398	-0.0637698	-0.213186	0.705179
110460	-0.375957	-0.585388	-0.631414	0.352288	0.604541	0.303141
110521	0.319623	-0.0690604	-0.093488	-0.0974308	-0.33931	0.213734
110524	-0.166574	-0.365251	-0.011138	0.185131	0.323074	-0.0344512
110532	0.293955	0.257303	0.132245	-0.247439	-0.144998	-0.394808
110606	0.167341	0.19287	0.0719316	-0.306795	-0.198614	0.0263835
110611	-0.118072	-0.453245	-0.368796	-0.040288	-0.18874	0.507105
110616	-0.0189413	-0.0693127	-0.0192249	0.172769	-0.0206521	-0.071187
110637	0.247138	0.100788	0.0472915	-0.319627	0.0411178	-0.16349
110639	0.191551	0.435327	-0.1609	-0.0808837	-0.27536	-0.196369
110651	0.180443	0.987659	0.0138358	-0.447699	-0.556781	-0.612533
110749	0.540339	0.445616	0.306659	-0.740703	-0.516131	-0.386347
110750	0.537877	0.498473	0.498556	-0.634086	-0.878668	-0.524015
110809	-0.0457588	-0.120764	-0.221581	0.0907162	0.137528	0.129761
110816	0.490863	0.500441	0.802353	-0.794237	-0.784801	-0.945809
110821	0.520543	0.0653682	0.531268	-0.575426	-0.421461	-0.416266
110826	0.170469	-0.185645	-0.239697	0.0244242	0.185752	0.00297113
110842	-1.76119	-1.70854	-1.66046	0.637181	0.927012	1.06091
110854	-0.099319	0.265816	0.206506	0.0710958	-0.0082172	-0.527834
110911	0.666393	0.531983	0.377867	-0.670136	-0.614434	-0.827755
110948	0.0910093	-0.0269019	0.0549971	0.0149443	-0.171447	0.0276594
110954	-0.317447	-0.44315	-0.327493	0.0767319	0.38316	0.452916
110956	-0.89323	-0.74552	-0.602351	-0.0349657	0.416507	1.13906
110960	-0.1135	0.0309737	0.378657	0.00921584	-0.0372499	-0.357448
110962	-0.151133	-0.101889	-0.165618	-0.0066958	0.40134	-0.0279805
111175	-0.119056	-0.100396	-0.058142	-0.0631008	0.269798	0.0460986
112403	0.266519	0.141747	-0.171719	-0.292775	-0.0105225	0.0144339
112405	-0.0929226	-0.0146166	0.117639	-0.105167	-0.209756	0.266002
112406	-0.257603	-0.523865	-0.388381	0.2389	0.581955	0.140855
112407	0.252827	0.233165	0.794352	-0.495425	-0.278342	-0.948928
112418	-0.0370228	-0.307486	-0.0374056	0.449157	0.0457119	-0.191386
112422	0.0474856	-0.202958	0.288227	0.16334	-0.0948169	-0.253561
11302	-1.31312	-1.24807	-1.43747	0.892808	0.706692	0.829342
11308	-0.148497	-0.194294	-0.109235	0.0892525	0.192404	0.0514569
11350	0.0312991	0.255584	0.216132	-0.0802294	0.102952	-0.648815
11364	-0.224613	-0.477788	-0.21808	0.217447	0.160478	0.389021
11370	0.143362	-0.136242	0.0593175	0.166519	-0.0581591	-0.201121
11409	0.210501	0.0548795	-0.0693161	0.0227532	-0.140881	-0.132167
114128	-0.92495	-0.227641	-0.237662	0.416432	0.51582	0.141415
114143	0.0219269	0.0905222	0.232551	-0.124216	-0.136665	-0.109339
114249	0.0918131	0.769835	0.0906284	-0.116382	-0.0858584	-1.1995
114255	0.693439	0.796237	0.476346	-0.71445	-1.03788	-1.14859
11428	-0.21674	-0.212151	-0.067603	0.175719	-0.0058028	0.279104
11429	0.433055	0.141035	-0.0235464	-0.175353	-0.0658516	-0.402757
114301	-0.398016	-0.664325	-0.630117	0.428476	1.16415	-0.56864
11432	0.0230825	0.805584	0.379341	-0.550592	-0.665087	-0.376601
11438	0.889552	-0.103509	1.78044	-1.57995	-1.61305	-2.21185
11443	-0.0861091	0.356049	0.000678735	-0.131492	-0.382997	0.151554
114565	0.0916321	-0.234533	-0.0814649	0.0803666	0.0443937	0.0637645
114584	-0.489455	-0.0896974	-0.626794	0.195313	0.776283	-0.0601738
114606	0.56462	0.932812	0.265532	-0.933384	-0.726349	-0.864859
11461	-0.739985	-1.5041	-0.673053	0.0607228	0.126343	1.2213
114641	-0.437604	-0.688799	-0.56323	0.114638	0.552713	0.562536
114663	-0.44168	-0.673919	-0.465966	0.307045	0.466238	0.48692
114674	-0.470979	-0.580154	-0.657935	0.49447	0.521672	0.32365
114713	0.0570413	0.293511	0.388772	-0.236268	-0.32816	-0.287136
114714	0.679427	0.00521655	0.55967	-0.895762	-0.650376	-0.152687
114715	-0.703212	-0.576603	-0.762489	0.103975	0.67608	0.719966
114716	-0.117595	-0.670529	-0.428021	0.606693	0.481013	-0.162308
11475	-0.420094	-0.819249	-0.627082	0.872488	0.653772	-0.400316
11477	-1.20055	-0.925663	-1.05648	0.634944	0.823718	0.647404
114774	0.275561	0.091837	0.244642	-0.405395	-0.256441	-0.0361258
11480	0.0817021	-0.0635762	-0.0537041	0.191688	0.0398017	-0.218917
11481	0.492492	0.472735	0.527969	-0.696946	-0.7302	-0.52659
114863	0.572907	-0.476672	0.282914	-0.399188	-0.312987	0.108446
114874	-0.494505	-0.442612	-0.358805	0.2028	0.597088	0.179927
11488	0.245209	-0.0563773	0.115105	0.147815	-0.149396	-0.359593
114896	0.319184	0.373865	0.23845	-0.39681	-0.233411	-0.486739
11490	0.213473	0.351419	-0.0917419	0.056389	0.0349928	-0.720839
11491	-0.261853	0.211509	-0.154266	0.0595949	0.133956	-0.0255615
11492	0.934373	0.912092	0.853372	-1.12944	-1.62112	-2.27076
11498	0.287512	-0.0414157	0.13052	-0.178837	-0.190843	-0.105452
11502	-0.503034	0.211246	0.0400353	0.233149	-0.131609	0.0653269
11512	0.0155154	-0.195438	-0.416407	0.193188	0.174895	0.15882
11513	0.278983	0.30131	0.184847	-0.184784	-0.356541	-0.33281
11514	0.644935	1.20512	0.645819	-1.66838	-1.46526	-1.18023
11518	0.0206569	-0.0342895	0.075358	0.00568777	-0.230174	0.0869086
11520	0.55936	0.685273	0.516874	-0.828844	-0.995903	-0.633767
11532	0.0981431	-0.369924	-0.0966269	-0.40063	-0.374505	0.863848
11534	0.33485	0.336115	0.263946	-0.637745	-0.463447	-0.0670273
11538	-0.232115	-0.0094591	-0.130998	0.261239	0.0413653	0.0370592
11539	0.359516	-0.0309267	0.422631	-0.276535	-0.143759	-0.476371
11541	-0.23029	0.111869	-0.013995	0.0888313	0.347883	-0.382527
11544	-0.157031	0.0926772	-0.0831968	-0.0983739	0.163305	0.064003
11545	0.315151	0.0361632	0.283254	-0.427472	-0.413741	0.00222844
11546	0.00702368	-0.165773	0.142225	-0.110455	-0.0676824	0.121343
11551	-1.73374	-2.08407	-1.76708	1.21994	1.39137	0.142168
11555	-0.0541392	0.457832	-0.130696	0.260952	-0.422504	-0.233897
11564	0.604865	0.0526548	0.194358	-0.353464	-0.366679	-0.307644
11565	-0.0578242	0.00359998	-0.0184404	-0.339537	0.171341	0.184742
11566	-0.369416	-0.695172	-0.421475	-0.288442	-0.353665	1.42891
11569	-0.111478	-0.569051	-0.0445458	-0.0289074	-0.0916547	0.664025
11596	0.14997	0.20326	-0.150465	0.0468426	-0.242541	-0.0414191
11603	-0.225261	-0.0662018	-0.434198	0.274639	0.195503	0.16755
11610	-0.0670427	-0.179011	-0.11245	-0.128362	0.131887	0.312927
11630	0.506542	0.57568	0.227339	-0.302475	-0.705011	-0.685974
11632	0.192684	0.219541	0.038529	-0.0707479	-0.13326	-0.2915
11636	0.0252132	-0.0871015	-0.0269725	-0.120122	0.0391327	0.158289
11637	0.293377	-0.11086	-0.0880046	-0.395229	-0.419513	0.516167
11640	-0.0912639	-0.121906	-0.201456	0.0648755	0.0262273	0.223417
11641	0.732259	0.725745	0.344309	-0.522179	-0.834476	-1.27194
11647	0.209484	-0.175328	0.17241	-0.147803	-0.190922	0.0926381
11655	-0.161478	-0.123908	-0.370301	0.197397	0.308882	0.076204
11658	-3.75847	-3.33732	-3.47136	1.39666	1.35206	0.853054
11666	-0.0813762	0.0172251	0.343075	-0.0929659	0.0895628	-0.333774
11669	-0.124646	-0.463333	-0.327081	0.220334	0.480266	0.0717481
116701	0.129697	0.0331887	-0.0025547	-0.0558765	-0.0602394	-0.0505277
11671	-0.314544	0.302471	-0.107707	0.18138	-0.0086134	-0.109956
116733	0.314141	0.00453657	-0.0556304	-0.150681	0.0476261	-0.198579
11674	0.828992	0.463923	0.612274	-0.870181	-0.773095	-1.12319
116748	0.0400899	0.0941628	0.0236315	-0.202096	0.0753982	-0.0448464
11676	-0.632019	-0.396835	-0.151952	0.36872	0.920411	-0.532868
11677	0.00438462	-0.197725	0.298749	-0.296281	0.0198596	0.117946
116848	0.720816	0.689963	0.615507	-0.659899	-1.11194	-1.27074
116870	0.165367	-0.286045	0.338662	-0.172849	-0.498994	0.31618
116871	0.160199	0.227449	0.170445	-0.161866	-0.0578167	-0.555443
116914	-0.535966	-0.210761	-0.228001	0.289758	0.204965	0.337874
11692	0.271998	0.0487199	0.0951994	-0.347702	-0.0801157	-0.0371652
116972	-0.298036	-0.0687257	-0.167147	0.239579	0.273353	-0.0378778
11702	-0.55362	-0.416329	-0.151487	0.30852	0.390659	0.238506
11703	0.0366999	-0.08234	0.212849	-0.256058	0.00687365	0.0539367
117109	0.514451	0.393428	0.350017	-0.653759	-0.54081	-0.384928
117146	0.166523	0.142116	0.188264	-0.167958	-0.260487	-0.117969
117148	0.363279	0.284104	0.162685	-0.319866	-0.136137	-0.491456
117149	0.353785	0.21361	0.227226	-0.122297	-0.150884	-0.775219
117150	0.254415	0.416774	0.243172	-0.278551	-0.417724	-0.376698
117171	-0.0666711	-0.0670585	-0.2482	0.00734985	0.170012	0.159088
117197	-0.211454	0.0222887	-0.308488	0.0630107	0.332876	0.042563
117198	0.691216	0.4065	0.631618	-1.206	-1.27873	-0.145049
11727	0.503869	0.458399	0.093147	-0.64187	-0.502474	-0.17676
11732	0.0807945	-0.0221109	-0.0380711	0.924292	-1.10643	-0.324649
11735	-1.15413	-0.865731	-1.25262	0.722147	0.69572	0.725011
11736	0.050056	0.366038	-0.054366	-0.0253582	-0.292136	-0.0987161
11737	-0.0795802	-0.67589	0.114986	0.2361	0.164569	0.0099091
11740	0.118827	-0.138113	0.122087	-0.152814	-0.0288523	0.0613367
11744	-1.62034	-1.41028	-1.26442	1.03946	1.42106	-0.158259
11745	-0.362899	-0.399965	-0.456029	0.631975	0.324923	0.0295253
11747	-1.07979	-0.51066	-1.08785	0.502417	0.84408	0.491856
11749	-0.323559	-0.560427	-0.324257	0.447662	0.466225	0.0773484
11757	0.183339	0.0765763	0.218491	-0.440853	-0.418625	0.261777
11758	0.470771	0.545314	0.148596	-0.249213	-0.467375	-0.766842
117589	0.639743	0.424961	0.438906	-0.584231	-0.686684	-0.705637
117592	-0.56784	0.412973	-0.609295	0.17328	0.236134	0.136667
117599	-0.25337	-0.440052	-0.215026	0.296207	0.456746	0.0104741
117606	0.385424	-0.0549495	0.0907817	-0.130163	-0.123122	-0.224339
11764	0.601968	0.342759	0.365389	-0.521785	-0.520508	-0.617672
11765	0.458047	0.178097	0.301146	-0.427712	-0.416968	-0.298913
11766	0.0334868	-0.0075923	-0.0587154	0.232119	0.153359	-0.409467
11767	0.0218022	0.285697	0.243503	-0.238888	-0.0749469	-0.305712
11768	0.131967	0.0892466	0.12915	-0.287851	-0.237842	0.0347289
11769	-0.182383	-0.312272	-0.509049	0.00319794	0.0138285	0.700025
11771	0.56324	0.398745	0.465917	-0.576651	-0.785989	-0.496151
11772	0.116988	0.177471	0.186808	-0.0904762	-0.187229	-0.245864
11773	0.18973	0.0583663	0.069084	-0.0792644	-0.0635488	-0.195786
11774	0.00655658	0.0172878	0.0162461	0.0294948	0.0302966	-0.111072
11776	0.0550644	0.221926	0.0879196	-0.0499238	-0.0515088	-0.298911
11778	0.404737	0.00242514	-0.0324533	-0.0437553	-0.120401	-0.319392
11781	-0.180008	-0.134116	-0.218429	0.142447	0.163	0.11804
11782	-0.0160944	-0.0836998	-0.0783668	-0.064898	0.0019652	0.225189
11783	0.307767	0.49827	0.378325	-0.494296	-0.666222	-0.359894
11785	0.627953	0.148663	0.556413	-0.570189	-0.706466	-0.455933
11787	-0.0716432	-0.301283	-0.229101	0.163573	0.0912734	0.286134
11789	0.0671403	-0.0616949	-0.127393	0.05557	-0.172542	0.214962
11792	-0.0428695	-0.205144	-0.0691625	-0.300323	-0.0629485	0.556616
11793	0.00951537	0.170029	0.072248	-0.129367	0.0417124	-0.193175
11797	-0.386879	-0.338476	-0.106412	0.422184	0.0798188	-0.0288306
11798	0.272797	0.331046	0.0596389	-0.307741	-0.211036	-0.232592
11799	-0.440418	-0.814164	-1.07575	-0.0729855	0.15246	1.14551
11804	0.165504	0.190347	0.0495206	-0.14461	-0.129596	-0.161153
11806	0.531163	1.3098	0.576738	-1.76246	-1.99402	-0.678497
11812	-0.184075	-0.464145	-0.288093	0.260713	0.297202	0.224887
11816	1.25785	0.523195	0.963257	-2.15945	-1.06844	-2.16307
11819	-1.63371	-0.429021	-1.37824	1.64004	-0.21527	0.390573
11820	-0.261203	-0.0829178	-0.391478	0.115635	0.126085	0.398205
11821	0.43125	0.208005	0.0804946	-0.412283	-0.0566682	-0.377166
11828	-0.0289543	0.085738	-0.321155	0.519258	0.267153	-0.750571
11833	0.393279	0.0287036	0.239082	-0.207456	-0.306744	-0.241156
11834	-0.14773	-0.0015264	0.351579	-0.0348676	-0.0959405	-0.110759
11836	-0.0501904	-0.156091	0.0371322	0.160836	-0.138635	0.11081
11837	-0.223081	-0.32518	-0.0423244	0.0663145	0.26055	0.11009
11838	0.0576606	-0.400237	-0.0590452	-0.0186993	0.496406	-0.179236
11840	0.40687	0.0893766	-0.0571131	-0.181878	-0.160051	-0.15789
11841	-0.227957	0.0816249	-0.246001	0.192797	0.0733416	0.0873585
11842	-0.332194	-0.241281	-0.274817	0.317055	-0.119468	0.507691
11844	-1.64579	-1.73288	-1.69673	0.228328	-0.0607141	2.17368
118445	-0.0516391	-0.0135052	-0.0688389	-0.0170829	-0.0346773	0.176396
11845	-0.510677	-0.0843007	-0.469673	0.14063	0.369152	0.375936
118451	0.178442	0.0921074	0.120784	-0.200542	-0.0998054	-0.118457
118453	0.127979	-0.304019	0.124448	-0.062628	0.200425	-0.128624
11846	-0.0176678	2.24157	-0.104425	-1.61156	-1.31755	-1.74292
11852	0.256387	0.60354	0.206928	-0.261037	-0.253974	-0.849572
11853	0.411336	0.0124257	-0.0971925	-0.129333	0.217744	-0.535751
11854	0.141234	0.346542	-0.282921	-0.263036	-0.0116643	0.00309181
11858	-0.0982837	-0.474587	0.00051305	-0.223963	-0.178079	0.764651
11859	0.356697	1.08898	0.745895	-1.24933	-1.15144	-1.08254
11863	0.216296	-0.0590985	0.1155	-0.150716	-0.166153	0.0118585
11865	-0.881869	-1.04589	-0.814652	0.695265	0.641316	0.572864
11867	-0.54605	-0.415544	-0.500588	0.264487	0.85712	-0.0694765
11876	-0.302901	0.187405	-0.277416	0.687688	0.00295963	-0.52531
11883	0.122708	-0.0689418	0.0700019	0.0651076	0.177397	-0.419908
11886	-0.285047	-0.114984	-0.351415	0.186344	0.305645	0.173132
11891	-0.0263258	-0.139774	-0.221434	0.162591	0.717236	-0.762991
11898	-0.100441	0.0157424	0.00607684	0.169801	0.267196	-0.424663
11899	0.840691	0.233835	0.793253	-0.527166	-1.05133	-1.22925
11906	-1.26077	-0.665532	-1.25161	0.82976	0.514149	0.727108
11907	0.327993	0.37135	0.357515	-0.508595	-0.537621	-0.291244
11909	0.454939	0.201918	0.24702	-0.239517	-0.32592	-0.556932
11911	-0.788781	-0.949333	-0.765316	-0.351696	-0.162518	1.43322
11920	0.503506	0.301837	0.608991	-0.541243	-0.715572	-0.63542
11927	0.0598373	-0.0731417	-0.591179	0.0561305	0.371509	0.0633244
11928	0.501223	0.3127	0.470664	-0.37714	-0.548601	-0.699443
11931	-1.35152	-1.20711	-1.6157	0.896529	0.831875	0.756097
11933	0.135483	0.203886	0.156474	-0.148323	-0.153704	-0.23669
11938	-0.0748162	0.115204	0.34921	-0.121559	-0.170642	-0.164776
11946	-1.61377	-1.33663	-0.795359	0.61868	0.94555	0.728727
11947	0.281581	-0.0615356	0.0184703	-0.218275	-0.0093787	-0.0416652
11949	-0.0555632	-0.301813	-0.131063	0.0869621	0.246155	0.111234
11950	-1.41733	-1.71097	-1.81478	0.371548	0.351456	1.79753
11951	0.273182	0.0585263	-0.0380783	-0.244436	-0.107065	0.0229225
11957	-1.00977	-1.14803	-1.28325	0.292298	0.52729	1.27817
11966	0.618993	0.358032	0.57708	-0.566822	-0.813308	-0.693806
11972	0.177075	-0.282897	-0.0280881	-0.207073	-0.357968	0.436851
11973	0.300598	0.116387	0.256603	-0.336844	-0.211847	-0.21062
11974	0.444455	0.0943554	0.0536727	-0.351249	-0.160198	-0.170688
11975	-0.0181126	0.431969	0.143806	-0.0627735	-0.178448	-0.411501
11977	-0.0032657	0.451455	0.458385	-0.157461	-0.345325	-0.618385
11981	-0.976367	-0.929366	-0.918422	0.898581	0.720644	0.299534
11982	0.242452	-0.594082	0.0987669	0.220536	0.017913	-0.0931294
11983	0.0192877	-0.0433102	-0.146644	-0.145472	0.209622	0.0843156
11989	1.32443	0.642505	1.25891	-2.15261	-2.45559	-2.88089
11993	-0.106427	-0.190939	-0.250384	0.0109475	-0.124262	0.493019
12006	0.801522	1.06755	0.914542	-1.63686	-2.00878	-1.534
12009	-0.040778	-0.0323241	-0.366826	0.102532	0.0989948	0.193947
12010	-0.489683	-0.443507	-0.500702	0.243232	0.608234	0.304933
12013	0.0159595	0.356946	0.254265	-0.0279765	-0.260591	-0.443382
12014	-1.36732	-1.19766	-1.39659	1.01449	0.812676	0.574741
12015	-0.860588	-1.22624	-0.974896	0.557706	0.719013	0.771879
12017	0.328838	0.119173	-0.130409	-0.418955	-0.0020166	0.0311578
12021	0.699782	0.354953	0.740086	-1.07316	-0.767999	-0.712121
12028	0.373412	0.340203	0.0399022	-0.563571	-0.203748	-0.130351
12033	-0.765172	-0.328611	-0.811985	0.394136	0.683858	0.352561
12035	1.40656	0.619118	0.752953	-1.78066	-1.94709	-1.5947
12036	0.564854	-0.125585	0.289284	-0.204788	-0.0721881	-0.655555
12039	-0.0707582	-0.0151752	-0.047182	-0.0222368	0.020666	0.12889
12040	-0.547771	0.272842	-1.52961	0.662592	0.514711	-0.0968018
12041	0.383763	0.159619	0.245526	-0.416828	-0.439306	-0.0995567
12042	0.375294	0.132463	0.184968	-0.251539	-0.264603	-0.268403
12043	-0.625371	-0.512354	-0.660814	0.571842	0.455421	0.212477
12048	0.458823	-0.129705	0.404771	-0.370646	-0.423424	-0.140279
12050	-0.151662	-0.0776323	-0.158331	0.130687	0.196627	0.0221776
12054	0.24686	0.0742709	0.110084	-0.23177	-0.0461467	-0.19286
12064	-1.15879	-1.34812	-0.839772	0.660589	1.13495	0.31333
12068	-0.0228007	-0.402451	-0.458049	0.273228	0.042218	0.42412
12069	0.0337209	-0.13664	-0.345293	-0.310725	0.0323352	0.540785
12070	0.595148	0.500156	0.129192	-0.778856	-0.383934	-0.411653
12091	-0.153661	-0.0185372	-0.238313	0.222284	0.140146	0.0135134
12097	0.123463	0.0593241	0.0238124	-0.267512	0.434265	-0.492687
121022	-0.223035	-0.111253	-0.416341	0.0348774	0.337817	0.279469
12111	-0.315154	0.151772	-0.418499	0.734603	0.173979	-0.611314
12122	0.231545	0.201363	0.151588	-0.0728246	-0.2024	-0.379643
12125	-0.166383	-0.059083	-0.0330666	-0.0454086	-0.0369543	0.287038
12144	0.182392	0.360581	0.257295	-0.540397	-0.116748	-0.286274
12151	-0.0590588	-0.417079	-0.335215	0.0241828	-0.263017	0.812624
12153	-0.342198	-0.249294	-0.510145	0.371618	0.128063	0.416111
12159	0.492488	1.25742	0.123883	-0.824225	-0.886829	-1.2232
12160	0.408534	0.279699	0.524138	-0.508983	-0.393124	-0.606563
12162	-0.620792	-0.114493	-0.822469	0.498241	0.609194	0.0681666
12166	-0.157227	-0.166162	0.106489	-0.0752188	-0.207663	0.147471
12167	-0.926353	-0.456589	-0.720972	0.822153	0.181912	0.518804
12168	0.0670735	-0.0416488	0.300155	0.0952656	-0.296553	-0.214286
12169	0.370076	-0.0556991	-0.0194877	-0.109539	0.0273529	-0.264516
12173	-0.821055	-0.218325	-0.844819	0.639332	0.432866	0.33362
12175	0.0636847	-0.299485	-0.0395811	-0.0391557	0.0239549	0.253444
12177	-0.0251504	0.0320587	0.198812	-0.0524861	-0.0330917	-0.134805
12181	0.539443	0.27557	0.602381	-0.791745	-0.604328	-0.457519
12189	-0.625792	-0.460483	-0.0221754	0.0720368	0.286097	0.529699
12190	0.347847	0.49331	0.248645	-0.509519	-0.456492	-0.381451
12192	-1.61059	-1.3979	-1.64689	0.732229	0.874852	0.993698
12212	0.573323	0.249567	0.364583	-0.679655	-0.64661	-0.186173
12224	-1.84073	-2.16767	-1.90805	1.28244	1.06119	0.596396
12226	-2.19465	-2.0569	-2.25806	0.826534	0.649884	1.43219
12234	0.335557	0.133482	0.392902	-0.307669	-0.435497	-0.287769
12236	0.584276	0.58623	0.341942	-0.78473	-0.695553	-0.52239
12237	0.399997	0.264467	0.0662756	-0.46307	-0.198002	-0.189853
12238	-1.06375	-0.979235	-1.24704	0.577518	0.775706	0.797387
12257	0.544447	0.236149	0.487324	-0.765672	-0.515085	-0.372385
12258	0.593977	0.492086	0.399257	-0.267589	-0.793993	-0.947272
12261	0.164668	-0.42649	-0.170262	-0.365445	-0.35072	0.860996
12268	0.199946	0.211331	0.204747	-0.0923096	-0.0591327	-0.568593
12282	0.634594	-0.0521599	0.444191	-0.435513	-0.424315	-0.434443
12291	0.216085	-0.409165	0.432726	0.512659	-0.17294	-0.92424
12293	0.535876	0.961772	0.464797	-0.730177	-0.954104	-1.25347
12296	0.0934199	0.111183	0.315038	0.0349902	-0.294379	-0.333491
12297	0.0113134	-0.184798	-0.136711	0.102976	-0.044624	0.171428
12298	0.0364624	0.0864954	0.399757	-0.110528	-0.185468	-0.297014
12301	-0.684652	-0.79694	-0.160886	0.247707	0.773716	0.207945
12305	-0.818274	-1.05591	-0.754322	0.289271	0.368773	0.53198
12306	-1.78188	-1.99915	-2.12741	1.09109	1.18832	0.67291
12310	0.891215	0.582692	0.826218	-1.16627	-1.03272	-1.49443
12314	-0.160247	-0.163532	-0.198509	-0.0103758	0.262441	0.221616
12315	-0.200072	-0.0562603	-0.423642	0.13503	0.362458	0.0951311
12317	0.367343	-0.543558	0.079481	-0.0735504	-0.381897	0.384493
12321	0.585156	0.327472	0.375601	-0.597905	-0.653434	-0.418871
12323	-0.276469	-0.274323	-0.415499	0.371188	0.418366	0.0297457
12325	-0.236076	-0.0975639	-0.155371	0.10486	0.339407	-0.0479162
12328	-0.158231	-0.207054	-0.300474	0.235003	0.13819	0.227187
12331	0.401862	0.39948	0.325391	-0.136092	-0.153225	-1.29308
12332	0.0589607	0.0355297	-0.176584	-0.0717746	0.359762	-0.315999
12333	-0.731828	0.309425	-0.684496	0.616755	0.466993	-0.395879
12334	-0.388852	-0.367118	-0.410139	0.263658	-0.149073	0.780041
12336	0.387248	-0.130285	-0.220119	-0.197131	-0.0751978	0.168499
12337	-0.375707	0.120566	-0.477507	0.310526	0.348814	-0.0649836
12338	-1.37625	-0.980061	-1.59076	0.490251	0.617318	1.23478
12339	0.138765	-0.109353	0.198371	-0.0829789	-0.478126	0.249664
12340	0.75581	0.301706	0.421677	-0.924212	-1.00348	-0.153266
12345	0.0139329	-0.245154	-0.270226	-0.108624	-0.13925	0.616027
12348	0.353263	0.355695	0.343684	-0.570882	-0.261687	-0.437592
12359	-0.45381	-0.521333	-0.473535	0.370221	0.377794	0.43382
12361	-0.191979	0.0641644	0.198268	0.0537174	0.0567365	-0.211018
12366	-0.832553	-0.511912	-0.700426	0.53666	0.458865	0.5454
12367	-0.042381	-0.0508191	0.472855	-0.201997	-0.0817965	-0.166803
12368	-0.797975	-0.91266	-0.920781	0.570896	0.671309	0.607607
12369	0.208444	-0.103165	-0.209927	0.235163	-0.117313	-0.0525641
12370	0.356369	0.132804	0.0901787	-0.214261	-0.207708	-0.238233
12371	-0.178499	-0.11026	-0.100252	0.359368	0.00559581	-0.0187653
12385	0.155545	0.212753	-0.0252097	-0.158457	-0.100054	-0.111849
12387	-0.974159	-0.797758	-0.81125	0.405524	0.727375	0.688665
12395	0.245043	0.131024	0.136743	0.280462	-0.257423	-0.698788
12396	0.368596	0.178946	0.0652822	0.0552099	-0.409752	-0.375055
12400	-0.203518	0.0162648	-0.168472	0.0408651	0.116245	0.170673
12406	-0.180042	0.284704	-0.222097	0.0201924	0.104436	-0.0479876
12408	-0.30264	-0.566134	-0.548698	0.177239	0.53928	0.42391
12412	-0.0901659	-0.0239858	0.435066	-0.265275	0.099657	-0.232474
12416	-0.0178117	-0.237916	-0.0121034	-0.0879838	-0.326514	0.567379
12419	-0.59988	-0.73968	-0.935676	0.025639	0.322777	1.18478
12426	0.00970944	0.460351	0.278243	-0.461912	-0.137083	-0.288308
12443	0.0240262	0.218653	-0.0623996	-0.401801	-0.336802	0.395798
12444	-1.32325	-1.47354	-1.52559	0.718144	1.15863	0.640068
12445	-0.343268	-0.113212	-0.337801	-0.00551026	-0.00480593	0.591561
12447	0.98877	0.679037	1.06917	-1.76279	-1.60028	-1.64287
12448	0.560871	-0.129304	0.219084	-0.856554	-0.618354	0.445211
12449	0.581727	0.176365	0.155841	-0.447358	-0.329459	-0.32298
12450	-0.218404	-0.252816	-0.0896898	-0.00156829	0.0225206	0.404197
12452	-0.901349	-1.1489	-0.880399	1.09025	0.631607	0.204954
12454	0.618318	0.10169	0.449835	-0.265968	-0.997709	-0.29457
12455	0.460224	0.328397	0.31457	-0.369794	-0.299929	-0.686582
12457	-0.454413	-0.693022	-0.299412	0.318494	0.238701	0.484528
12460	-0.24331	-0.225315	0.169019	0.0764242	0.171777	0.011452
12461	0.0168561	0.0292794	0.501142	-0.171995	-0.428344	-0.055087
12462	0.901063	0.352833	0.531906	-1.19536	-1.02847	-0.507733
12464	0.230494	0.0998395	0.249972	-0.266207	-0.0045269	-0.38909
12465	-1.31606	-1.12815	-0.120794	0.178729	0.621445	0.861839
12466	0.499437	0.159708	0.270386	-0.432048	-0.327589	-0.34478
12468	-0.224485	-0.293414	0.252981	-0.307152	0.341986	0.131282
12469	0.262792	0.110907	0.311877	-0.491017	-0.105905	-0.195615
12476	-0.729816	-0.810315	-1.03201	0.418548	0.81473	0.545668
12479	-0.932883	-0.788218	-1.21997	0.771975	0.810684	0.393283
12484	-1.24982	-0.964545	-0.857266	0.402945	0.811845	0.820749
12492	-0.45689	-0.257454	-0.207289	0.219561	0.505081	0.0532815
12499	-0.35605	-0.456252	-0.496189	0.381675	0.450464	0.234083
12509	0.244571	0.462102	0.106071	-0.134959	-0.046374	-0.864323
12512	-0.551022	-0.320211	-0.847445	0.1504	0.341483	0.631593
12520	-0.448914	-0.358948	-0.438799	0.264701	0.348414	0.428116
12527	-0.438547	-0.423734	-0.464946	0.265668	0.389895	0.44167
12530	0.56452	0.1929	0.212913	-0.491482	-0.572128	-0.131765
12531	-0.0377867	-0.0566122	-0.0366399	0.172157	0.21051	-0.289231
12532	0.491682	0.471917	0.145258	-0.479011	-0.239692	-0.668717
12534	0.186194	-0.178752	-0.065817	-0.351216	-0.116299	0.434164
12537	0.0688486	0.0122925	0.199398	-0.356043	-0.076609	-0.056302
12539	0.0742967	-0.22969	-0.401064	0.327027	0.281998	-0.150969
12540	-0.155503	-0.0130249	0.0136144	0.0846678	0.1214	-0.062768
12544	0.744212	0.264131	0.283141	-0.746257	-0.413613	-0.51759
12545	0.208848	0.276775	0.300282	-0.390597	-0.483586	-0.0480795
12550	-0.685747	-0.354378	-0.38938	0.378821	0.352336	0.426862
12560	-1.39189	-0.605502	-1.28304	0.63234	0.762703	0.705278
12566	-0.0455774	-0.270721	-0.16053	-0.128983	-0.225785	0.616128
12568	-0.277439	-0.470079	-0.298338	0.25179	0.333625	0.309914
12569	-1.9233	-2.017	-1.63569	0.860888	1.23313	0.783566
12575	-0.398621	0.252519	-0.472157	0.0892706	0.346823	-0.00907763
12576	0.267747	-0.321469	0.119875	0.0664029	-0.0872222	-0.0936199
12577	0.204571	-0.127195	-0.373921	0.153712	0.0806095	0.0102083
12578	0.476222	0.268113	0.213498	-0.411254	-0.192784	-0.547924
12581	-0.335351	-0.022227	-0.210861	0.336291	0.292918	-0.148114
12583	-2.4153	-1.66057	-2.61663	1.50963	1.09279	0.418451
12585	0.0225715	0.0819619	0.0687003	-0.243267	0.109938	-0.0597687
12589	-0.0523407	0.216805	0.117229	-0.0973823	-0.2002	-0.0354555
12590	1.57251	-0.104344	1.6242	-2.7414	-2.66756	-2.73296
12593	0.562769	0.0400588	0.263508	-0.165132	-0.392382	-0.524668
12608	-1.42352	-1.16155	-1.30035	1.49413	0.89178	-0.268208
12611	-0.231105	-0.017865	-0.232054	0.0758796	0.321984	0.032757
12614	-1.88024	-2.02953	-1.61672	0.29766	0.30762	2.00213
12615	0.111039	0.177692	0.0502501	-0.348934	-0.135256	0.10038
12616	-0.784869	-0.262379	-0.585206	0.532191	0.406429	0.336077
12626	-0.612645	-0.516268	-0.561093	0.284423	0.693973	0.339421
12631	-0.800785	-0.0837179	-0.339355	0.509634	0.658972	-0.295539
12632	-0.20262	-0.265803	-0.21445	0.128495	0.22519	0.261585
12648	0.709457	0.265154	0.830139	-1.05223	-1.35985	-0.361649
12649	-0.295915	-0.120401	-0.172779	0.137126	0.257607	0.111829
12651	-0.0038889	0.145071	-0.203597	0.0412797	-0.0088163	0.0151276
12659	-0.618736	-0.455965	-0.725794	0.49036	0.495314	0.413648
12660	-0.555172	-0.257091	-0.468293	0.119702	0.42374	0.442353
12667	0.812021	0.702584	0.565076	-1.24794	-1.07015	-0.822685
12675	0.176071	0.428416	0.439686	-0.466407	-0.625108	-0.191953
12695	0.187408	0.00859794	-0.0108682	-0.118795	-0.107522	-0.16867
12696	-1.40754	-0.71888	-1.43849	0.849993	0.981788	0.363993
12700	-0.446326	-0.800365	-0.558471	0.40312	0.614392	0.374206
12702	0.172116	0.31491	0.039513	-0.273115	-0.229304	-0.0852242
12704	0.501314	0.64819	0.298449	-0.409795	-0.764707	-0.736886
12705	0.955021	0.766766	0.723546	-1.34799	-1.23377	-1.47236
12709	-0.550481	-0.396192	-0.826003	0.844825	0.580935	-0.158143
12716	-0.282997	-0.95852	-0.416491	0.915245	0.488235	-0.270382
12721	1.04953	-0.463126	0.712037	-1.25398	0.168034	-1.34665
12724	-0.233951	-0.234138	0.0377138	0.276642	0.200754	-0.102011
12725	0.111236	0.0753937	0.448691	-0.044213	-0.353798	-0.403423
12729	0.493667	0.280372	0.305781	-0.667941	-0.544621	-0.134861
12739	-1.3135	-0.569999	-1.22099	0.834044	0.698875	0.494845
12740	-1.06394	-0.368366	-0.512125	0.862069	0.383864	0.15361
12747	-0.520289	-0.565499	-0.440761	0.327629	0.378734	0.52215
12748	0.318405	0.0414593	0.121628	-0.221147	-0.255075	-0.0737348
12750	-0.486943	-0.666308	-0.34337	0.318546	0.25901	0.537108
12751	-0.709326	-0.483473	-0.654645	0.543207	0.481103	0.403738
12752	0.884314	0.287808	0.16759	-0.330784	-0.88306	-0.612849
12753	0.0631695	-0.367142	0.0927029	0.113642	-0.040839	0.0445336
12757	-0.419831	-0.402024	-0.522416	0.117525	0.573863	0.242334
12759	1.02123	0.913903	0.850086	-1.73535	-1.65449	-1.74805
12764	-0.465683	-0.837531	-0.106147	0.458491	0.476297	0.162444
12767	0.113571	0.0162528	0.417641	-0.55799	-0.0338208	-0.0702861
12793	-0.584484	-0.832658	-0.36412	0.0626798	0.213359	1.00095
12795	0.563157	0.229891	0.321853	-0.48475	-0.181142	-0.740292
12798	0.571519	1.06027	0.384114	-0.615129	-1.03824	-1.5164
12799	0.286254	-0.103274	0.172808	0.0395197	0.0114136	-0.495443
12807	0.0390881	0.17097	0.274609	0.0651327	-0.20225	-0.422817
12808	-0.464373	-0.199958	-0.701399	0.784586	0.55634	-0.394348
12812	0.31071	0.14807	0.435846	-0.44679	-0.527807	-0.110788
12822	-0.0260973	-0.0895168	-0.0178476	0.0412361	-0.0415401	0.0868203
12824	-1.70631	-1.92198	-1.89559	0.509326	0.873071	1.43477
12826	0.609408	0.629439	0.341619	-0.470342	-0.797893	-0.873638
12827	0.0234439	0.302545	-0.404004	0.177316	0.108294	-0.295748
12830	-0.573087	-0.0566821	-0.760344	0.487138	0.57745	-0.0088828
12831	-1.25983	-1.26261	-1.46151	1.11318	0.707991	0.578921
12833	-1.28745	-1.18413	-1.39515	1.50599	1.20656	-0.936085
12834	-0.110571	-0.36987	-0.208282	0.27006	0.690783	-0.501884
12836	-1.59699	-1.64696	-1.48439	1.23452	1.38097	-0.194786
12840	0.108551	0.0108532	0.0145811	0.243026	-0.0900891	-0.330038
12842	-1.16865	-1.06462	-1.28092	1.35416	1.07699	-0.553442
12847	0.234276	0.222427	-0.0940111	-0.126943	-0.178579	-0.0967249
12848	0.203061	0.073537	0.142507	-0.248929	-0.0935837	-0.111139
12850	0.166779	-0.253982	0.0110989	-0.197594	-0.0081281	0.238433
12854	0.0350493	0.118505	0.0141996	0.112785	-0.0442341	-0.27645
12856	-0.0479045	-0.0886341	-0.206007	-0.229812	-0.0098818	0.499342
12857	-0.240187	-0.449168	-0.475911	0.171014	0.319426	0.480655
12858	-0.32078	-0.189802	-0.314339	0.0777794	0.240595	0.400082
12859	0.132771	-0.173787	-0.30281	-0.0998017	0.102633	0.285401
12861	-0.533138	-0.579944	-0.81526	0.221815	0.448248	0.77493
12864	-0.737953	-0.620233	-0.753195	0.265718	0.779838	0.51494
12865	0.553131	-0.339397	0.135213	-0.306924	0.0686263	-0.24982
12866	-0.588826	-0.254177	0.00180183	-0.0179976	0.428764	0.277577
12867	-0.156056	-0.396993	-0.356993	0.00729974	0.394142	0.370087
12868	-0.772038	-0.696696	-0.786018	0.26654	0.567798	0.803848
12874	-0.0539251	0.190607	0.387425	0.0442052	-0.337932	-0.332099
12890	-0.893096	-1.05882	-1.1612	0.671522	0.796903	0.608147
12895	0.184878	0.25335	0.419019	-0.294271	-0.405894	-0.29821
12896	0.272405	0.288735	0.440923	-0.176587	-0.372203	-0.674211
12903	0.310492	2.01483	0.382324	-1.81804	-1.87691	-2.18314
12904	0.773023	0.594875	0.610315	-1.10125	-0.602107	-1.24737
12908	-0.715693	-0.907739	-0.675405	1.03845	0.55251	-0.0087509
12909	0.273796	0.0783991	-0.0123581	-0.220114	0.0642633	-0.226706
12912	0.134082	-0.0586263	0.144387	-0.072095	0.0205576	-0.219043
12913	0.0321671	0.152213	-0.224722	0.0118669	0.0363968	-0.0255495
12915	-0.367013	-0.308164	-0.49587	0.347361	0.187313	0.446212
12916	0.0968024	0.121037	-0.0617425	0.0520142	-0.0992763	-0.121576
12927	0.707801	0.905661	0.604524	-1.08674	-1.21745	-1.14817
12928	-0.364543	-0.175564	-0.399654	0.289774	0.417506	0.0966793
12929	0.428797	0.0496445	0.356115	-0.324432	-0.634569	-0.062721
12934	-0.880992	-0.45544	-0.608191	0.288015	0.699937	0.458802
12953	0.373004	-0.0804602	-0.140034	0.019317	0.0886073	-0.324901
12971	0.519497	0.434256	0.294438	-0.876615	-0.0921515	-0.67593
12972	0.0802677	0.11405	0.241241	-0.290144	-0.532448	0.178081
12974	-0.531359	-0.348865	-0.493208	0.382566	0.467342	0.275297
12982	-0.665752	-0.186481	-0.756022	0.633591	0.461573	0.133656
12988	-0.0144504	0.102432	0.0143682	0.0865425	0.207317	-0.457329
12995	0.0527136	-0.0093918	0.00828853	-0.174014	0.0603762	0.0529319
13000	0.226027	0.14356	0.211764	-0.350318	-0.193795	-0.106267
13002	0.192187	0.218958	0.0762619	-0.0905375	-0.157877	-0.286343
13003	-0.663711	-0.798421	-0.62895	0.043936	0.56286	0.896109
13006	-0.990713	-0.730642	-0.745767	0.535143	0.610174	0.625955
13008	1.12508	0.707807	0.429078	-1.24992	-1.34208	-1.066
13010	-0.484749	0.346282	-0.19861	0.048211	0.248304	-0.0650111
13014	-0.529931	-0.570694	-0.838935	0.386169	0.535466	0.555268
13018	-0.146779	-0.0292091	-0.0853055	-0.0284238	0.187856	0.0849628
13019	-0.423508	-0.362409	-0.436041	0.291436	0.514652	0.210591
13026	0.0488906	0.295765	-0.0969042	-0.0864837	-0.0018542	-0.192838
13030	-1.03747	-0.79505	-0.788505	0.527876	0.824959	0.484667
13033	-0.119063	0.480227	0.537305	-0.131048	-0.061259	-1.08587
13036	0.320799	0.363968	-0.0369243	0.0712658	-0.0988621	-0.827695
13039	0.15471	0.120511	0.224	0.262431	-0.19323	-0.730371
13043	0.382255	0.170533	0.182026	-0.312813	-0.513672	-0.156131
13046	0.29762	0.323495	0.208162	-0.537669	-0.574158	0.079913
13047	-1.13725	-0.890805	-1.15975	0.933493	0.715139	0.355766
13048	-0.617607	-0.302385	-0.620567	0.588719	0.349468	0.283013
13052	0.374887	-0.6012	0.520591	-0.246633	-0.443146	-0.294868
13056	-1.15777	-0.287948	-0.87185	0.539184	0.76725	0.315744
13057	-0.439734	-0.222638	-0.629801	0.159984	0.481552	0.408564
13063	-0.599199	-0.334025	-0.188422	0.174631	0.426842	0.0871266
13121	-0.324356	-1.12144	-0.554636	0.102302	0.258694	1.01897
13123	0.198263	-0.215117	-0.256356	0.124172	0.274132	-0.189103
13131	0.746769	0.467731	0.608058	-0.712706	-0.796341	-1.08038
13132	0.908298	1.09097	0.963119	-2.00653	-1.4937	-2.54182
13135	0.180311	-0.169475	-0.222504	-0.148131	0.13812	0.17929
13138	0.0827023	0.605002	0.0169111	-0.168755	-0.502357	-0.225595
13139	-0.515873	-1.02634	-0.827064	0.874262	0.983492	-0.403714
13143	0.337659	0.00375153	0.366628	0.0322875	-0.334783	-0.558769
13144	0.464812	0.646858	0.425392	-0.693011	-0.783962	-0.561733
13163	0.405593	0.349595	0.120366	-0.303099	-0.151294	-0.59679
13167	-0.418945	-0.688669	-0.891238	0.113459	0.760034	0.471716
13169	-0.172275	0.11966	-0.287348	0.191219	0.233207	-0.138972
13170	-0.896726	-1.03656	-0.807909	0.703018	0.70976	0.492081
13171	0.00958177	-0.169568	-0.313489	0.322323	0.17928	-0.0907287
13177	-0.688743	-1.39685	-1.05465	0.701784	0.759441	0.60152
13178	-0.191489	-0.0455149	0.067465	-0.108908	-0.128504	0.360074
13179	-4.90701	-4.84595	-4.96948	0.771684	1.27701	1.73178
13180	0.408391	0.551736	-0.173725	-0.800323	-0.369216	0.0931943
13185	0.62757	0.136229	0.136393	-0.363696	-0.45245	-0.27922
13191	-0.123147	-0.287939	-0.203998	0.490825	-0.0419643	0.0758791
13193	-0.827406	-1.27146	-1.20516	0.100405	0.294395	1.54702
13194	0.419184	0.569723	0.2917	-0.726117	-0.580602	-0.325923
13195	0.526564	0.688697	0.372702	-0.683701	-0.874062	-0.583448
13196	0.0804038	0.437145	0.0876479	-0.200486	-0.330369	-0.162522
13197	0.42618	-0.142411	0.747715	-0.292807	-0.303556	-0.808156
13198	-0.169169	-0.905838	-0.527085	0.301266	0.473386	0.449435
13200	0.196276	0.133553	-0.1117	-0.19291	0.0945023	-0.151554
13202	-0.0261283	0.210965	0.414211	-0.299949	-0.0045783	-0.402213
13204	0.180469	0.0122527	0.179662	-0.311287	-0.279014	0.0622367
13205	-0.968149	-0.233032	-0.352321	0.609042	0.35873	0.216127
13209	-0.429092	-0.256728	-0.609858	-0.1239	0.359901	0.709994
13211	-0.503408	-0.321852	-0.759254	0.274038	0.335611	0.630999
13216	0.366076	0.247104	0.467227	-0.136996	-0.446892	-0.772893
13244	0.468406	0.559551	0.411101	-0.475376	-0.724327	-0.668308
13340	0.606686	0.742821	0.275841	-0.648342	-0.596765	-1.00044
13346	0.224457	0.357373	0.636461	-0.345993	-0.255491	-1.01583
13347	0.549463	-0.210832	0.231376	-0.033121	-0.528646	-0.171363
13350	0.252712	0.248637	-0.170898	-0.139278	-0.0372404	-0.204299
13353	0.0955908	0.0168042	-0.0912341	-0.197018	0.0698243	0.0831854
13356	-0.0568076	0.0887818	0.0731248	0.140824	-0.0311908	-0.23607
13358	0.265576	-0.0248734	0.196097	-0.3355	-0.0945832	-0.0958877
13360	-0.228091	-0.552009	-0.0448086	0.0760929	0.235894	0.383926
13361	0.443015	0.301082	0.301431	-0.527841	-0.420983	-0.30888
13367	0.683928	0.338891	0.571459	-0.612191	-0.905865	-0.640918
13382	-1.30976	-0.884739	-0.772943	0.566955	0.851353	0.571474
13384	-0.142371	-0.0744474	0.36606	-0.221194	-0.0394145	0.0615726
13386	0.376383	0.307277	0.154237	-0.1553	-0.651423	-0.200265
13388	0.571376	0.261904	0.458885	-0.563415	-0.492832	-0.577239
13393	0.407587	0.762648	0.297315	-0.50214	-0.422093	-1.08649
13401	0.353258	0.277292	0.350074	-0.363964	-0.337495	-0.468018
13424	0.725655	-0.210557	0.0673173	-0.0859609	-0.300791	-0.387536
13426	0.201528	0.805413	0.197517	-0.570649	-0.59219	-0.399627
13427	0.0028083	0.157737	-0.136666	-0.0061323	0.145508	-0.186188
13430	0.199739	0.1519	0.144509	-0.158795	0.119805	-0.553949
13433	-0.130502	0.122254	0.0699884	-0.121103	-0.0011106	0.0480581
13436	1.45231	0.719739	1.16459	-2.90139	-2.65387	-2.59234
13445	0.114324	-0.162732	-0.157765	-0.183861	0.0994743	0.251007
13449	0.223172	0.344025	0.256477	-0.288469	-0.401689	-0.258689
13476	-1.54499	-1.33664	-2.01193	1.09217	1.0361	0.541439
13478	0.425803	0.386811	0.228835	-0.494362	-0.291602	-0.468499
13480	-0.0333889	0.045563	0.169676	0.103839	-0.0373662	-0.293572
13481	-0.0481701	0.0473444	-0.391395	0.00799013	0.261313	0.0702554
13482	1.02937	0.96107	0.921796	-1.97542	-1.64918	-2.0278
13494	-0.0631659	-0.124692	-0.155947	-0.269062	-0.139152	0.521016
13495	0.334753	0.271019	0.198691	-0.325185	-0.24713	-0.350376
13496	0.283813	0.800325	0.573902	-0.45562	-0.659764	-1.26533
13497	-0.584593	-0.575811	-0.483043	0.596087	0.40393	0.298806
13511	0.384462	0.290965	0.144462	-0.476775	-0.52901	-0.0303636
13518	-0.317714	-0.432003	0.156401	-0.0806776	-0.00319571	0.463911
13527	-0.436156	0.975406	-0.0309121	-0.258394	-0.225614	-0.346203
13528	0.11726	-0.0681783	-0.251389	0.00381058	0.211609	-0.0426268
13542	-0.0153447	0.110073	-0.0343737	0.0186192	0.00136269	-0.116972
13548	-0.269076	-0.129233	0.101484	0.00693101	0.0370135	0.218715
13549	-0.417105	0.187103	-0.374321	0.274963	0.0155353	0.207236
13555	0.00792379	0.246053	0.143408	-0.276404	-0.0911991	-0.0690937
13557	0.589605	0.465033	0.447957	-0.573403	-0.692962	-0.703321
13559	0.450457	0.832281	0.627491	-1.01566	-0.849538	-0.899877
13560	-0.423736	-0.29619	-0.383229	0.37481	0.719412	-0.254646
13589	-0.201618	-0.133219	-0.0671698	-0.0271041	0.155076	0.240372
13595	-0.0155154	-0.0238018	0.0256407	-0.196745	0.273907	-0.0921804
13601	-0.161149	-0.102041	-0.0568845	0.320923	-0.15336	0.11102
13603	0.114609	0.505924	-0.0565208	-0.139706	-0.127622	-0.406158
13614	-0.942777	0.492515	-1.06357	0.0466652	0.428459	0.458284
13617	-0.0605983	0.563579	-0.0073252	0.105869	-0.223372	-0.530694
13618	-0.497766	-0.515629	-0.649562	0.625108	0.837854	-0.306491
13619	0.488213	0.154574	0.371479	-0.497665	-0.471659	-0.269402
13626	-0.422285	-0.249721	0.00325011	-0.0193285	0.419367	0.166556
13627	0.127589	-0.322134	-0.35387	-0.0671262	0.0920938	0.421391
13629	0.557655	-0.221601	0.113497	-0.58434	-0.548805	0.379261
13631	-2.51707	-2.61463	-2.01566	0.824217	1.08136	1.2912
13636	0.223532	0.376808	0.282906	-0.179163	-0.388433	-0.470173
13639	-0.068571	-0.102068	-0.158584	-0.180887	-0.140075	0.543934
13640	-0.00541515	0.231798	-0.201386	0.0264241	0.0172344	-0.21462
13641	-0.219309	-0.375826	-0.28877	0.24445	0.330686	0.198267
13642	-1.72716	-1.14944	-1.33686	0.977839	0.881299	0.620321
13643	0.324066	0.0760455	0.217288	-0.28115	-0.0062443	-0.425606
13644	-0.349366	-0.228879	-0.402909	0.323948	0.284692	0.239515
13645	-0.120988	0.171582	0.255603	-0.128322	0.118999	-0.358428
13649	-1.54322	-1.29019	-1.37385	1.68188	0.903718	-0.480439
13650	-0.138347	0.153859	-0.498668	0.259554	0.0931307	0.046814
13653	-2.42568	-1.83238	-2.59354	3.09676	0.186381	-1.58881
13660	0.712174	0.718041	0.401325	-0.639671	-0.780861	-1.22781
13663	-0.433306	-0.070047	-0.402921	0.238375	0.10492	0.424898
13664	0.626666	0.804266	0.689535	-0.975267	-1.05799	-1.17541
13666	-0.343904	-0.628141	-0.1318	0.519826	0.161507	0.223252
13667	0.30055	0.216756	0.425941	-0.410409	-0.39125	-0.310579
13669	-0.665441	-0.36802	-0.191289	0.102789	0.460241	0.36498
13680	-0.728831	-0.145411	-0.0939315	0.275549	0.273777	0.2463
13681	0.177907	-0.253506	0.14117	-0.181465	-0.202943	0.247703
13682	0.0756439	-0.25557	-0.0133225	-0.0150225	-0.0923106	0.237579
13684	-0.165647	0.413098	0.154167	-0.09657	0.099327	-0.521294
13685	0.812114	0.350049	0.809143	-1.12007	-0.830785	-0.978776
13688	0.526592	0.418282	0.201041	-0.283829	-0.56184	-0.578921
13690	-0.363502	-0.450949	-0.143218	-0.0602571	-0.180889	0.481481
13709	-2.08265	-1.63129	-1.98446	1.08722	1.03654	0.790611
13710	-0.641238	-0.641677	-0.450206	0.610827	0.584491	0.093466
13711	-2.40431	-1.39856	-2.26649	1.12751	1.26577	0.532252
13713	-1.23831	-0.685911	-1.34174	0.736256	0.865613	0.505532
13716	-0.0559512	0.315067	-0.019523	0.0282476	-0.0289986	-0.281262
13722	0.341009	0.0997027	0.279119	-0.527953	-0.303452	-0.0192568
13723	1.23072	1.05911	1.33572	-3.57474	-4.50728	-2.92097
13726	-0.387914	-0.788898	-0.930505	-0.110656	0.093849	1.3038
13728	-0.0716292	-0.0683738	0.0438817	0.110222	-0.0123887	-0.0216156
13730	-3.17265	-1.89261	-3.16291	1.48327	1.42207	0.301871
13731	0.0664633	-0.0212791	-0.195747	0.498413	0.171473	-0.702975
13800	0.118284	-0.201609	-0.167899	0.275998	0.240093	-0.341501
13803	0.499469	0.0794676	0.871739	-0.588375	-0.668752	-0.723333
13806	0.825196	0.356122	0.689533	-1.06544	-0.880555	-0.76288
13807	0.432479	-0.280348	0.638838	-0.115216	-0.157892	-0.836571
13808	1.01659	1.15784	0.863131	-1.84539	-2.06384	-2.33011
13821	-0.152335	-0.429914	-0.357601	0.375306	0.390107	0.0255571
13822	0.196825	0.0752043	0.505677	-0.371859	-0.459296	-0.0978163
13823	-1.79652	-1.67664	-1.83339	0.772473	1.00811	1.04441
13824	0.0854227	0.0850613	-0.238613	-0.131	0.130303	0.0441618
13829	-0.799839	0.063842	-0.476365	0.311041	0.0457921	0.523153
13831	-0.413242	-0.421606	-0.47733	0.346585	0.474216	0.249994
13835	0.232079	0.0642186	0.0597182	-0.200236	-0.167283	-0.036524
13837	0.319671	-0.150637	0.017801	0.174	-0.0494079	-0.380972
13838	0.397384	0.0918108	0.108654	-0.191157	-0.216566	-0.267224
13841	-0.39217	-0.856109	0.0324508	0.493047	0.636839	-0.278142
13844	-0.465532	0.0604817	-0.479839	0.458763	0.324891	-0.0752038
13845	0.204113	0.127304	0.115772	0.00449605	0.150464	-0.745325
13846	0.28247	-0.10037	0.0525321	0.156848	-0.132574	-0.3124
13855	0.284196	0.274828	0.0240803	-0.234283	-0.226129	-0.242646
13857	0.287253	-0.0008541	0.4158	-0.354216	-0.0730379	-0.400595
13858	-0.494095	-0.169913	-0.140593	0.413123	0.310947	-0.0484668
13859	-0.0085381	0.210422	-0.0269626	0.018046	-0.0486858	-0.161387
13860	0.34364	0.258481	0.170182	-0.264906	-0.156693	-0.472232
13864	0.0610888	0.196193	0.00265371	-0.133059	-0.416104	0.185884
13865	-0.258119	1.00809	0.366711	0.103225	-0.94873	-0.944803
13870	0.407253	0.27346	0.132012	-0.408832	-0.287833	-0.246858
13872	0.336667	0.361721	0.333746	-0.419706	-0.357606	-0.45922
13875	-0.410033	-0.72658	-0.511988	0.397307	0.381401	0.519624
13877	-0.381024	-0.220363	-0.498463	-0.0964505	0.489979	0.489334
13885	-0.328509	-0.249254	-0.25103	-0.0823136	0.0920399	0.305134
13929	-0.0386791	0.221291	-0.0475209	-0.0837087	-0.0343777	-0.031424
13972	0.0844041	-0.221793	-0.299366	0.0623649	0.248357	0.076191
13990	-0.110033	0.294201	-0.0021293	0.0325954	-0.245181	-0.0064484
13992	0.174586	-0.392091	-0.275463	-0.12278	-0.0451043	0.531342
13998	-0.666839	-0.546487	-0.475164	0.578931	0.711691	-0.0159578
14000	0.369855	0.310583	0.114231	-0.372702	-0.328582	-0.249104
14007	-1.12971	-0.402549	-0.662348	0.77124	0.586732	0.197253
14011	0.309903	0.0629225	0.136228	-0.135988	-0.0701545	-0.366286
14013	-1.3705	-1.27735	-1.27291	1.08212	0.556389	0.743103
14020	-0.0668537	0.0614361	-0.276596	0.120469	-0.0284788	0.161145
14026	-1.09243	-0.526581	-0.633696	0.365337	0.753261	0.505764
14042	-0.239941	0.0939762	-0.193974	0.180973	0.0923213	0.0330364
14043	0.0517852	0.186271	-0.0496946	-0.0367783	-0.0604511	-0.104057
140481	-0.0118505	-0.100461	-0.231087	0.1934	0.11535	-0.0148004
140484	0.148444	-0.0119393	-0.0376652	-0.0689765	-0.0310268	-0.0455608
140486	0.241893	0.281792	0.47973	-0.37636	-0.493866	-0.330824
140488	0.0836538	0.289319	0.129608	-0.218948	-0.143138	-0.23681
14049	-0.190507	-0.546773	-0.40462	0.259346	0.39556	0.301611
14050	0.401019	0.243712	0.44883	-0.499545	-0.648861	-0.413287
140500	0.408528	0.108648	0.249895	-0.219693	-0.266029	-0.41268
14051	0.278707	-0.0407571	0.200178	0.166469	-0.0407945	-0.70856
140546	0.105731	-0.126321	-0.0460542	-0.200626	-0.110099	0.0787281
14055	0.58275	0.104178	0.363214	-0.595852	-0.132881	-0.59654
14056	-0.0699581	-0.0872289	-0.059578	-0.208783	0.151553	0.217616
14057	0.288512	0.252483	0.189111	-0.432977	-0.22479	-0.225721
140577	0.629466	0.501526	0.595576	-0.417948	-0.91047	-1.11388
140579	0.0576509	-0.0165727	0.231136	0.247181	-0.158306	-0.43731
140580	0.870394	1.46908	0.964362	-2.55403	-2.33095	-3.02231
14062	-0.26731	0.0585594	-0.145172	0.171501	0.102295	0.0484478
140629	0.251252	0.247059	0.0694377	-0.331862	-0.177347	-0.155205
14063	0.437804	0.696377	0.753229	-0.705314	-0.6123	-1.52445
14070	-0.999561	-0.766743	-0.987472	0.539858	0.757135	0.613952
140703	0.188647	0.320646	0.0428767	-0.097766	-0.0109346	-0.544405
140709	-0.13853	0.739654	-0.177354	0.180264	0.0511052	-1.02979
140721	-0.153103	-0.396496	-0.380005	0.501966	0.231351	0.0504877
14073	-0.152729	0.423293	0.153472	-0.225579	-0.0674376	-0.207179
140740	0.272555	0.210693	0.163455	-0.164451	-0.227495	-0.334386
140742	-1.78998	-1.69634	-2.01028	1.17172	1.05419	0.625953
140743	-0.0969256	0.29336	-0.170182	-0.0349322	-0.0882539	0.0649342
14077	1.18471	-0.562721	0.790036	-0.819622	-0.852222	-0.698524
14081	-0.789442	-0.414828	-0.548442	0.484565	0.545721	0.330135
14082	-0.246074	0.0916269	-0.169867	-0.0870164	0.164223	0.161127
14083	0.248935	0.419899	0.229041	-0.348148	-0.361132	-0.339701
14084	0.111813	0.210302	0.0633175	-0.0896638	-0.15864	-0.286829
14085	0.6007	0.0741893	0.402293	-0.525356	0.103068	-1.09772
140858	0.12564	0.177052	0.434806	-0.303866	-0.254102	-0.289652
140859	0.0537363	-0.111856	-0.281368	0.071082	0.275872	-0.0485057
14086	0.858156	0.556659	0.598183	-1.07665	-0.996397	-0.905198
14088	0.383219	0.212523	0.144802	-0.293675	-0.285759	-0.314281
140887	0.211255	0.0837531	0.0713794	0.137189	-0.221981	-0.35845
140917	0.376347	0.194038	0.398009	-0.543823	-0.239374	-0.37499
14104	-0.0754344	-0.0005137	0.15956	-0.186771	-0.0033774	0.0894683
14105	-0.0792639	-0.127179	0.00702443	-0.130255	-0.336991	0.425598
14109	-0.358796	-0.464134	-0.509767	0.15735	0.55214	0.376884
14113	0.386391	0.0362662	0.117319	-0.564412	-0.0426655	-0.0430327
14114	-0.542049	-0.661163	-0.56674	0.356702	0.376866	0.559826
14115	-0.546795	0.060104	-0.0098645	0.856767	0.0854944	-0.842001
14118	-1.56227	-1.85973	-1.70524	1.63039	0.694442	0.318612
14128	-0.341558	-0.372609	-0.511033	0.100725	0.425835	0.482784
14132	-0.0708851	0.267423	-0.123908	0.428844	0.166806	-0.92204
14149	0.197083	0.140735	0.231014	-0.181063	-0.191617	-0.266704
14155	0.75462	0.568689	0.596711	-0.965779	-1.07746	-0.73534
14156	0.36666	0.285779	0.23893	-0.417746	-0.307803	-0.312659
14158	0.351894	0.0831873	0.331442	-0.128807	-0.345666	-0.442592
14168	-0.977319	-0.712689	-1.17329	0.720684	0.684287	0.549674
14171	0.652493	1.84222	0.946382	-3.1797	-3.18004	-3.16514
14183	-1.04663	-1.21579	-1.25642	0.525945	0.287537	1.3353
14184	-0.515239	-1.13345	-0.462629	0.516591	-0.255088	1.10612
14194	0.25877	-0.0288851	0.219614	-0.325941	-0.0183758	-0.162451
14199	1.08317	1.27991	0.949095	-2.16186	-2.83101	-2.8651
14200	0.180621	1.02127	0.334033	-0.52593	-0.57738	-1.1067
14208	0.996851	0.303501	0.701045	-1.42075	-1.41522	-0.393517
14219	0.6853	0.885343	0.499632	-0.788563	-1.13012	-1.22238
14221	-0.50364	0.0971512	-0.0687601	0.516716	0.23326	-0.457073
14225	0.248277	0.266639	-0.0539542	-0.459639	-0.213232	0.119226
14227	-0.0484511	-0.342033	-0.290265	-0.0371441	0.319947	0.125077
14228	0.504628	0.180601	-0.115984	-0.430599	-0.221179	-0.0413842
14229	0.273043	0.170689	0.062346	-0.450917	-0.0130258	-0.115942
14230	0.751574	0.523127	0.496227	-0.408369	-1.04109	-1.10124
14232	0.105035	0.231621	-0.0916374	-0.169944	-0.130111	0.027345
14235	0.146634	0.255429	0.0588576	-0.227865	-0.175208	-0.102273
14236	0.467346	-0.166165	-9.62e-05	-0.943566	-0.443514	0.682927
14248	0.218871	0.350978	0.201535	-0.171074	-0.197211	-0.531003
14251	0.334373	0.292866	-0.324355	-0.0261076	-0.0204803	-0.355146
14252	0.100454	0.1278	-0.0554047	-0.0683654	-0.169057	0.046184
142682	0.0110656	-0.0968951	-0.30414	0.0895523	-0.0147227	0.272681
142688	-0.681763	-0.470982	-0.906032	0.718106	0.454932	0.356739
14269	-0.009665	0.0203965	0.292503	-0.108249	0.0785306	-0.321134
14272	-0.0959574	0.0511253	-0.0177152	-0.0515453	0.102901	-0.0754306
14287	0.44141	0.185481	0.242579	-0.417121	-0.245729	-0.390998
14297	-0.351448	-0.140349	-0.0664417	0.000571347	0.139381	0.321317
14299	0.645324	0.364305	0.389149	-0.613098	-0.519906	-0.768896
14302	-0.648987	0.0508363	-0.605176	0.620003	0.272479	0.0280257
14312	0.0595585	-0.014444	0.0274092	-0.0651287	0.0398837	-0.0770962
14313	1.347	-0.823295	1.23351	-1.02441	-1.09397	-1.49635
14314	-0.827977	-0.437459	-0.654376	0.241396	0.395214	0.796739
14319	-0.112438	-0.488595	-0.289428	0.0976071	0.361344	0.298422
14339	-0.333112	-0.098192	-0.259973	0.179356	0.370027	0.0587622
14345	0.188709	0.19785	0.284251	-0.312843	-0.408231	-0.0462007
14349	0.263088	0.122363	0.0475542	-0.0356974	-0.0907595	-0.393824
14356	0.141871	0.104636	0.0294908	-0.321365	-0.155137	0.129902
14365	0.300813	0.173124	0.552676	-0.370742	-0.31346	-0.567389
14366	0.169829	0.244137	0.423571	-0.502906	-0.156012	-0.327785
14368	-1.27512	-0.511819	-1.4549	1.05519	0.673636	0.296703
14369	0.597827	0.159504	0.396405	-0.500953	-0.389206	-0.547674
14370	-0.238927	-0.416666	-0.211522	0.175736	-0.04765	0.587523
14375	0.218981	-0.031683	0.200272	-0.412265	-0.392197	0.182316
14376	0.353417	0.17338	0.382191	-0.463051	-0.725989	-0.0637635
14381	0.625044	0.209275	0.200378	-0.495021	-0.554896	-0.23211
14387	-0.549723	-0.180714	-0.356236	0.572014	0.301845	0.0108788
14388	-1.12722	-0.871768	-1.03113	0.894025	0.508331	0.627262
14390	-0.0329467	-0.0780638	0.291928	0.0837281	-0.312583	-0.139072
14391	0.52333	0.330541	0.467502	-0.800007	-0.861031	-0.107902
14402	0.949007	-0.0454758	0.911332	-0.629889	-0.981477	-1.21457
14420	0.35001	0.249468	0.114276	-0.234978	-0.0693293	-0.532583
14423	0.284752	0.293614	0.140573	-0.347781	-0.233816	-0.252437
14430	-0.0161488	-0.100021	0.0296941	-0.084099	0.135139	0.0122251
14431	0.0512597	0.0985021	-0.363337	0.208768	0.154982	-0.208488
14432	0.494588	0.900336	1.13051	-1.23158	-1.2598	-1.9804
14450	0.745684	0.402329	0.533348	-0.94712	-0.798029	-0.613008
14456	-1.16559	-1.91546	-1.49154	0.669184	1.30506	0.573449
14462	0.937312	0.97721	0.87025	-1.06797	-2.17639	-2.14059
14465	0.607996	0.805147	0.485459	-0.581773	-1.07934	-1.11891
14466	0.291562	0.312843	0.107034	-0.191239	-0.20293	-0.420189
14467	-0.0355646	-0.40521	-0.359427	0.151022	-0.144824	0.625113
14470	-0.186509	-0.338889	-0.34842	0.106847	0.232968	0.38234
14472	1.16951	1.26038	1.26514	-3.60642	-4.11534	-3.85985
14479	0.0673271	0.145569	0.262819	0.168206	-0.114007	-0.656498
14489	0.0169916	0.0340563	-0.143186	0.0650789	0.0837085	-0.0652685
14528	0.0399693	0.00790681	-0.0056187	-0.239489	0.103605	0.0763388
14533	-0.245747	-0.414137	-0.598264	0.0380988	0.511534	0.464193
14534	0.495172	0.278391	0.522197	-0.841739	-0.710619	-0.15306
14536	1.17311	0.900901	1.55927	-3.52627	-3.45881	-4.10156
14537	0.589455	0.482123	0.487859	-0.384354	-0.46154	-1.39814
14538	-0.4869	0.250421	-0.2401	0.426516	0.166901	-0.262548
14548	-0.812118	-0.7213	-0.956226	0.327925	0.713088	0.710013
14567	-0.273183	-0.634658	0.314239	-0.0119661	-0.129301	0.464583
14570	0.631218	0.252996	0.263814	-0.635281	-0.67482	-0.158239
14571	-0.297095	-0.333874	-0.176181	-0.00565111	0.362496	0.127997
14573	-0.178366	1.4807	-0.142499	0.0165438	-0.67411	-1.68548
14584	1.53696	0.654093	1.00704	-2.37415	-2.30891	-2.65731
14594	0.012821	0.540747	0.0763017	-0.077309	-0.197472	-0.489251
14595	0.0376515	0.405971	0.208617	-0.24954	-0.355801	-0.143618
14600	-0.986145	-0.999985	-0.956784	0.702751	0.460826	0.515696
14605	-0.090797	-0.216873	-0.0954271	0.137786	-0.0085555	0.241128
14608	0.407811	1.46483	0.544392	-1.40469	-1.33726	-1.51952
14609	0.51111	0.360487	0.468127	-0.733135	-0.478677	-0.495154
14615	-0.807789	-0.413069	-0.379355	0.281865	0.523236	0.451456
14619	-0.194994	-0.104675	0.0333838	0.643256	0.0690192	-0.691845
14620	1.10084	1.24598	0.742717	-1.92224	-2.13808	-2.51811
14628	0.073784	0.089724	-0.0905684	0.15819	0.0223403	-0.28254
14629	-0.566543	-0.281568	-0.0666644	0.284127	0.414503	0.0655893
14630	-0.415055	-0.462845	-0.414922	0.311211	0.712253	0.00122317
14634	0.483034	-0.0464877	0.218158	-0.446546	-0.313316	-0.0285652
14635	0.228143	0.18232	0.35988	-0.404413	-0.302179	-0.178852
14645	-0.0335513	-0.0812187	-0.152721	0.176815	0.271752	-0.224229
14651	0.478144	0.0834754	0.0693598	-0.180955	-0.073264	-0.497296
14661	0.485717	0.17133	0.824044	-1.11728	-1.33584	0.115489
14664	-0.695496	-0.732367	-0.701863	0.956409	0.155259	0.422549
14667	-0.288889	-0.0659226	-0.108568	0.0800836	0.469853	-0.169275
14670	-0.0568879	0.0644707	-0.249181	0.177729	0.0586785	-0.0188832
14672	0.208423	0.157591	0.410375	-0.169787	-0.339641	-0.389274
14673	0.71338	0.129501	0.553662	-0.883191	-0.873984	-0.176202
14674	0.0638898	0.314643	0.0389817	0.0196921	-0.236153	-0.252894
14675	1.32e-05	-0.0746373	0.396964	0.494522	-0.147671	-0.97218
14678	0.335893	-0.18222	0.47662	-0.289704	-0.231574	-0.241121
14681	0.696469	0.249415	0.418113	-0.597231	-0.655763	-0.513979
14683	-1.00138	-1.13148	-1.06471	0.244409	-0.0496995	1.63142
14687	0.43265	0.0607598	0.0526144	-0.257785	-0.0032879	-0.377783
14688	0.394444	-0.0763374	-0.0022409	-0.354753	-0.406847	0.318415
14693	-0.136102	-0.136994	-0.117364	0.111329	0.013925	0.237398
14694	-0.975933	-0.927275	-0.681489	0.461707	0.635763	0.726414
14695	0.335678	0.150576	0.339563	-0.239274	-0.194421	-0.536613
14696	0.390778	0.589358	0.664991	-0.439494	-0.650563	-1.22832
14697	-1.0724	-0.875165	-1.07352	0.404072	0.911169	0.673267
14700	-1.02735	-0.747309	-1.30337	0.557228	0.8648	0.618102
14702	1.39263	0.510326	0.790748	-1.62383	-1.3883	-2.08558
14705	0.483548	0.206531	0.407793	-0.484456	-0.447516	-0.404127
14707	-2.06605	-1.18075	-0.920649	0.107652	1.30361	0.886826
14708	-0.596986	-0.404025	-0.651016	0.560725	0.551078	0.177947
14712	0.624864	0.368451	0.291467	-0.541711	-0.570296	-0.512919
14718	0.535464	0.480345	0.296713	-0.479093	-0.472454	-0.717651
14719	0.181409	0.155843	0.174257	-0.254944	-0.113942	-0.18894
14731	0.144936	-0.0614265	-0.444776	-0.0697827	0.153881	0.210139
14733	-0.183818	-0.0948847	-0.0169244	0.048173	0.0850156	0.145446
14734	0.05088	0.143706	0.0022522	0.050995	-0.0977794	-0.179794
14735	-0.760013	-0.5063	-0.504814	0.548542	0.545647	0.277575
14739	0.598001	0.515911	0.365182	-0.462085	-0.61336	-0.880339
14745	-0.240454	0.0897661	0.0743738	0.00717841	0.0571719	-0.0051204
14755	-0.242382	0.182845	0.13519	-0.0070466	0.0823127	-0.185803
14760	0.762614	0.499721	0.620722	-0.925484	-0.921306	-0.84451
14768	-0.41651	-0.554509	-0.559969	0.529493	0.479876	0.206181
14773	0.0890679	0.00257245	0.563162	-0.430904	-0.153046	-0.204154
14775	-0.0503341	-0.375021	-0.270651	-0.169566	-0.168662	0.814914
14776	-0.446731	-0.896923	-0.895805	0.514803	1.36678	-0.615547
14778	1.11746	1.58005	0.756219	-2.77229	-3.09138	-3.34503
14783	-0.0713343	-0.0647279	-0.201679	-0.0865867	-0.182355	0.521693
14784	0.230764	0.260892	-0.0384616	-0.130033	-0.16658	-0.205121
14786	0.616241	0.418346	0.321171	-0.712349	-0.705217	-0.339569
14787	0.459481	-0.0271471	0.380758	-0.338066	-0.205342	-0.438386
14789	-0.311384	-1.01778	-0.308258	0.769303	0.606244	-0.24242
14790	-0.686994	-0.661614	-0.798394	0.343422	0.63418	0.61787
14791	-0.406754	-0.304486	-0.0960031	-0.0266539	0.392296	0.317402
14792	0.328426	0.308225	0.392223	-0.468005	-0.535578	-0.43661
14793	0.095417	0.0699197	-0.0076639	-0.365405	0.0333259	0.114498
14797	-2.28251	-2.54033	-2.06933	1.00189	1.23538	0.928227
14809	0.282443	0.00505137	0.389961	-0.121153	-0.641704	-0.0641194
14824	0.0534555	0.0298934	-0.0246574	0.194724	-0.047428	-0.228226
14828	-0.618718	-0.655588	-0.24304	0.0714202	0.295084	0.789141
14841	0.0779392	0.497235	0.250627	-0.490259	-0.17816	-0.315213
14852	0.292158	0.205699	0.140204	-0.363203	-0.148687	-0.205025
14853	0.441429	0.571491	0.596131	-0.730096	-0.707237	-0.71772
14854	0.103867	-0.277768	0.0532862	0.147819	0.133852	-0.227952
14860	-0.213134	-0.627931	-0.654228	0.488468	0.949335	-0.44886
14862	0.325229	0.555116	0.556285	-0.683989	-0.667914	-0.515448
14863	-1.29037	-0.986879	-1.4215	0.630163	0.862702	0.802307
14865	0.145978	0.111572	0.172748	0.162436	-0.440689	-0.22841
14866	-0.346083	-0.273942	-0.208374	0.0499482	0.232832	0.434023
14870	-0.11773	-0.994338	-1.33265	0.337603	0.646843	0.453354
14872	0.60803	-0.0474593	0.0470802	-0.0815844	-0.30907	-0.357443
14873	-0.965901	-0.948951	-0.906178	0.807365	0.488854	0.646256
14874	-0.429018	-0.0775917	-0.723772	0.284214	0.36429	0.346328
14884	-0.0302114	-0.0199774	-0.118601	0.0501895	0.0785826	0.0342015
14885	0.437916	0.519519	0.634223	-0.754727	-0.70924	-0.662837
14894	-0.413724	-0.292327	-0.0340486	0.128148	0.456409	0.0440949
14897	-0.250357	0.144089	0.344197	-0.0653709	-0.197746	-0.205587
14904	0.137256	0.0351731	0.179403	-0.226424	-0.300262	0.0461443
14911	0.396762	0.178294	0.412747	-0.30341	-0.388522	-0.488515
14913	0.170264	-0.212877	0.181968	-0.357475	0.0314078	0.128977
14923	0.628791	0.336133	0.269465	-0.675662	-0.445615	-0.437963
14924	-0.329298	-0.300154	-0.270924	0.212844	0.0420571	0.355589
14950	0.0306789	-0.296481	0.00223143	-0.168839	-0.334442	0.576225
14955	-1.54821	-0.905441	-1.42901	0.853664	0.897933	0.606319
14958	-2.25686	-1.68202	-1.69283	0.729996	1.02927	1.12647
14961	-1.94517	-2.25902	-2.29977	1.49192	1.6405	-0.453882
14972	0.209824	0.273035	0.242011	-0.396781	-0.678504	0.166026
14977	0.210085	0.0750626	0.172908	-0.21745	-0.161969	-0.124687
14979	-0.176262	-0.48338	0.0418037	0.173357	0.0727168	0.284832
14985	0.250421	0.233423	0.00350617	-0.0945457	-0.206497	-0.238437
14991	0.526027	0.271834	0.0989523	-0.355248	-0.119964	-0.624309
14998	0.170724	-0.306247	-0.22192	0.14403	0.220886	-0.063895
14999	0.423346	0.132049	0.260773	0.022796	-0.184222	-0.898542
15006	0.30471	0.143744	-0.0015604	-0.123919	0.0885615	-0.499005
15040	-1.14628	-1.13741	-0.713907	0.559376	0.962737	0.470628
15077	-0.757766	-0.647209	-0.695341	0.323298	0.561597	0.560376
15078	-0.581976	-0.951431	-0.956885	0.321646	0.602839	0.828274
15081	-0.691248	-0.619856	-0.716113	0.488492	0.62836	0.417667
15114	-1.58005	-1.03866	-1.45585	0.861217	0.707205	0.872186
15117	0.604931	1.18352	0.707835	-1.637	-1.90012	-0.89858
15159	0.0910346	0.209517	0.1335	-0.0368197	-0.177072	-0.259229
15161	-0.366623	0.00574799	-0.0282584	0.0819626	0.00159532	0.257953
15168	0.449349	-0.0613524	0.190945	-0.174629	-0.134311	-0.368697
15182	-0.617677	-0.464492	-0.497097	0.359228	0.582445	0.316009
15183	0.0256056	-0.0508861	-0.0398209	-0.094921	0.050823	0.102954
15184	0.0774952	-0.20193	0.0871946	0.245799	-0.0448023	-0.222663
15185	0.387448	-0.131621	0.578121	-0.412801	-0.325465	-0.324179
15191	0.350242	-0.115018	-0.140973	-0.423183	-0.288759	0.4286
15193	0.303518	0.238493	0.116978	-0.361518	-0.107695	-0.277465
15194	0.405608	0.630212	0.67315	-0.741257	-0.752814	-0.857306
15199	-0.322466	-0.0501052	-0.559878	0.259328	0.347698	0.180064
15200	0.435813	0.616107	0.54482	-0.565443	-0.727784	-0.851726
15203	-0.025916	0.711917	0.222803	-0.390307	-0.30283	-0.448794
15204	-0.433662	-0.164336	-0.360955	0.325776	0.277333	0.223519
15205	-1.14142	-0.925461	-1.31532	0.629004	0.814408	0.742982
15211	0.353732	0.479056	0.376447	-0.400469	-0.478785	-0.618582
15212	-0.957333	-0.457549	-0.723571	0.571065	0.751053	0.235201
15213	0.283311	0.639565	0.208034	-0.344761	-0.230698	-0.891127
15220	-3.25457	-2.45217	-3.22112	1.15954	1.55627	0.690908
15228	-0.262739	1.47646	0.693947	-0.359496	-1.58201	-1.70927
15239	0.0220718	-0.0193277	-0.139915	0.191826	0.0846845	-0.160142
15245	0.378188	-0.0087346	0.249036	0.141527	-0.266823	-0.657239
15251	0.299681	0.0350479	0.19179	-0.107281	-0.522599	0.00997349
15254	-0.874623	-1.03095	-1.09511	0.266136	0.481194	1.19956
15258	-0.229366	-0.0784223	-0.208896	0.00182478	0.170559	0.293926
15260	0.194523	0.04156	0.339323	-0.364329	-0.696512	0.276413
15270	-0.0945086	-0.187649	-0.0276435	0.0586862	0.0492373	0.182481
15277	0.413745	0.381279	0.507109	-0.669366	-0.471643	-0.500358
15278	-0.324006	-0.316843	-0.457344	0.11147	0.487754	0.322316
15312	0.113819	0.0150478	-0.28714	-0.182475	0.0587384	0.238538
15331	-0.169528	-0.289208	-0.37776	0.0449036	0.398235	0.279593
15353	-0.349704	-0.134843	-0.164142	0.0305697	0.155872	0.383801
15356	-0.00357037	-0.21634	0.0227101	-0.00521849	0.108585	0.0468723
15361	0.308171	0.00483795	0.395223	-0.464265	-0.193605	-0.181981
15364	-0.463009	-0.197599	-0.216687	-0.123356	0.46626	0.378411
15369	0.261379	-0.105249	0.0709641	-0.241771	-0.102497	0.0802654
15374	-0.256501	-0.195232	-0.152751	-0.102409	0.235149	0.381433
15375	-0.76963	-0.51628	-0.917441	1.04194	0.329899	0.173108
15376	-2.18701	-2.06806	-2.07254	0.751287	1.09464	1.20692
15377	1.3253	0.997746	1.12168	-3.06768	-3.03726	-2.67154
15381	0.173787	0.0321001	0.187547	-0.272595	-0.173163	-0.0439373
15382	-0.230887	-0.759805	-0.535689	0.135763	0.00216103	0.874519
15384	0.0117831	-0.195817	-0.0533622	-0.0243176	0.0102173	0.229576
15387	0.328611	-0.0436654	0.143302	-0.780996	-0.703038	0.410176
15394	0.435469	0.138425	0.73039	-0.673727	-0.745368	-0.302433
15398	0.183801	0.191531	0.125477	-0.113449	-0.127056	-0.308626
15399	-1.80773	-1.34178	-1.7461	0.939134	1.13721	0.595548
15401	-1.8732	-2.0247	-2.11555	0.348922	1.03758	1.51185
15402	-2.41442	-1.88112	-2.19527	0.920201	1.33182	0.821
15404	0.524534	2.33355	0.586788	-3.92229	-3.39958	-4.04709
15410	-1.38171	-0.328655	-1.17233	0.662577	0.734521	0.493376
15412	-1.28178	-0.686958	-0.900934	0.38716	0.645546	0.895064
15413	-0.0724885	1.02146	0.286841	-0.531781	-0.832183	-0.385424
15425	-1.83062	0.0398095	-1.65172	0.03269	0.775332	1.04087
15441	-0.898057	-0.312385	-0.858506	0.54289	0.550187	0.435238
15451	0.256265	0.179599	0.0495543	0.0329541	-0.11627	-0.480491
15460	0.134986	0.555863	0.327127	-0.227798	-0.16684	-0.929103
15461	-0.333989	-0.667868	-0.44728	0.230653	0.418595	0.515406
15463	0.255684	0.0486217	0.11801	-0.273644	-0.393903	0.0698457
15464	-0.123369	-0.304158	-0.27737	0.235954	0.356029	0.0280351
15467	0.245124	0.280788	-0.0695934	-0.187281	-0.0737602	-0.252692
15468	0.308467	0.345179	-0.0137577	-0.194594	-0.213425	-0.325774
15473	-0.325719	-0.516495	-0.423291	0.0466191	0.369218	0.59725
15476	0.137285	0.663512	-0.183077	-0.316223	0.0409983	-0.548622
15478	0.778143	1.07344	0.285565	-0.74336	-1.26691	-1.43342
15481	-0.340923	-1.00027	-0.776323	-0.32773	-0.432194	1.47555
15488	0.00290672	-0.0127689	-0.0510629	0.0143568	0.117514	-0.0761795
15490	-0.778008	-0.266885	-0.552555	0.368437	0.615836	0.260006
15493	-0.741904	-0.100463	-0.738972	-0.147911	0.970939	0.271128
15499	0.274887	0.0962206	0.0634467	-0.231613	-0.380738	0.109382
15500	-0.4127	-0.418218	-0.0080246	0.16071	0.358815	0.196589
15502	0.0802464	0.0569606	0.181821	0.00802108	-0.252178	-0.101673
15507	-3.15816	-3.17142	-3.53899	1.60512	1.04923	0.875588
15510	0.0780518	-0.221014	-0.0829074	-0.504201	-0.35997	0.63782
15512	-0.644048	-0.931755	-0.55467	0.47597	0.190213	0.803418
15519	-0.747836	-0.25479	0.0554883	-0.137486	0.300958	0.54928
15525	-0.025291	0.289658	0.594931	-0.355938	-0.413258	-0.278088
15526	0.305502	0.0800552	0.252409	-0.371062	-0.35212	-0.043403
15528	-0.943075	-0.579427	-0.467809	0.184955	0.774371	0.506493
15529	-0.0584983	0.0547772	-0.383856	0.238451	0.0834595	0.0160422
15530	0.0104625	0.157094	-0.263867	-0.187235	-0.0733376	0.304333
15531	-0.925745	-0.411468	-0.810658	0.828606	0.312739	0.41311
15547	-0.0119162	0.033725	0.122332	-0.143232	0.0216422	-0.031361
15567	0.453302	-0.223051	0.28121	-0.44829	-0.341988	0.125447
15568	-0.12086	0.00264278	-0.0361276	-0.0468784	0.0919526	0.100788
15569	0.453402	0.680263	0.659096	-0.951883	-0.66354	-0.908231
15574	-0.010668	0.119106	-0.0079679	-0.103302	-0.058709	0.049478
15586	-1.53611	-2.04989	-2.04726	0.883725	0.903948	1.109
15587	0.303556	-0.044348	-0.113513	-0.0979879	-0.134184	0.0544416
15893	0.457144	0.412729	0.451825	-0.486425	-0.39062	-0.812523
15894	-1.47914	-0.814066	-1.27395	1.22349	0.717782	0.217559
15902	-0.140717	0.307893	0.124032	0.0827991	-0.00725702	-0.490854
15903	0.247024	0.113908	0.359519	-0.427117	-0.305111	-0.1002
15925	0.140605	0.174346	0.211228	-0.0258947	-0.226286	-0.332982
15926	-0.904501	-1.0009	-0.948282	0.421882	0.628815	0.895558
15929	-0.0839369	-0.31064	-0.20425	-0.163843	0.0856455	0.490131
15931	-0.747094	-0.239809	-0.392518	0.513353	0.438315	0.145758
15932	-0.178197	0.0189043	-0.0600501	0.213934	0.0951358	-0.113653
15937	-0.244253	0.0433218	-0.425762	0.136183	0.336512	0.0673669
15944	-0.172908	-0.0696691	-0.065926	-0.243877	0.323411	0.125573
15958	-0.629542	0.171354	0.104623	-0.0370922	0.0540396	0.210606
15969	0.207509	0.148702	0.0123706	-0.042802	-0.100261	-0.258697
15976	-0.10196	-0.24812	-0.117599	0.406108	0.193905	-0.228409
15979	-0.10884	-0.162868	-0.327997	0.307066	0.18121	0.0480162
15980	-0.679143	-0.410625	-0.770428	0.119557	0.639762	0.3843
15983	0.564885	0.292453	0.657567	-0.604753	-0.662774	-0.743293
16001	0.777301	0.268871	0.380109	-0.818573	-1.20215	-0.047055
16002	-0.523008	-0.268732	-0.708349	0.248689	0.415185	0.528105
16004	0.481728	0.610501	0.203069	-0.554836	-0.436835	-0.7026
16005	0.505854	0.625047	0.536835	-0.934729	-0.615935	-0.723679
16007	0.146038	-0.0128144	0.489426	0.100128	-0.220686	-0.914342
16008	-2.53545	-2.14279	-2.5865	0.362937	0.850441	1.81389
16010	-1.54415	-0.665509	-1.35791	0.28384	0.661211	1.1961
16011	-1.70419	-0.707249	-1.61328	0.60599	0.848114	0.913183
16068	0.221091	0.247223	0.0738372	0.0706258	-0.20474	-0.501919
16150	-0.262256	-0.122478	-0.16339	0.0950793	0.106669	0.295933
16151	-0.20608	-0.19073	-0.198418	0.25229	0.24638	-0.0369065
16155	-1.29153	-1.03722	-1.31141	0.756209	1.0561	0.452442
16157	-0.112046	-0.201166	-0.114852	0.447104	0.130798	-0.227887
16164	-0.756493	-0.593409	-0.650558	0.852048	-0.0313283	0.620497
16179	0.0683588	-0.22958	-0.0980062	0.0129138	0.26096	-0.0464126
16188	0.308209	0.216131	0.376332	-0.414345	-0.178844	-0.469022
16201	0.239382	0.163916	0.186611	-0.395943	-0.19631	-0.143529
16202	0.368348	0.0269654	0.218644	-0.205571	-0.248843	-0.267148
16204	0.218664	0.0594495	-0.0941802	-0.370669	-0.326669	0.405577
16205	0.467722	0.135413	0.345113	-0.384498	-0.168966	-0.59734
16206	-2.47816	-2.77419	-2.5582	1.08413	1.19641	1.04451
16210	0.265313	0.662698	0.281002	-0.352608	-0.579522	-0.597166
16211	-0.56713	-0.178253	-0.0841447	0.0515721	0.227218	0.416912
16319	-0.140201	0.0537311	-0.027789	-0.159736	0.176209	0.0779485
16332	0.313627	0.317632	0.0534223	-0.128668	-0.470515	-0.221598
16351	0.189116	0.348042	0.39782	-0.388092	-0.269722	-0.446207
16362	0.606126	0.669088	0.71714	-0.875143	-0.810153	-1.27524
16363	-2.06466	-1.46015	-2.10235	0.971519	1.0368	0.882995
16372	0.492106	1.16437	0.24666	-1.28538	-1.05296	-0.61642
16373	0.829597	0.805372	0.401539	-1.04706	-1.25339	-0.782663
16391	0.293046	-0.0541716	0.230688	-0.225151	-0.224782	-0.0773019
16392	0.324586	0.369572	0.548924	-0.331908	-1.03909	-0.270807
16400	-0.0941388	0.575138	-0.0138371	-0.0158472	-0.21386	-0.356946
16402	0.777388	0.568977	0.857415	-0.886186	-1.21245	-1.39573
16403	-0.796699	-0.0965094	-0.362151	0.757928	0.361348	-0.210419
16410	0.261377	0.192896	0.115234	-0.194717	-0.420666	-0.0304756
16412	-0.156271	-0.0903139	0.0916829	0.101239	-0.117093	0.0923401
16413	-0.0465143	-0.510811	-0.451338	0.261091	0.462308	0.111764
16418	0.457356	0.330702	0.246273	-0.571848	-0.415879	-0.262787
16419	-0.64338	-0.446357	-0.797452	0.47166	0.5711	0.402715
16423	-0.590979	-0.537763	-0.352502	0.514859	0.466298	0.206639
16430	-0.110203	0.130359	-0.0461135	0.192845	-0.213754	0.0204445
16431	-1.39683	-1.64381	-1.39769	0.872339	0.25173	1.35453
16432	-1.81347	-1.62969	-1.74883	0.878937	1.12805	0.725745
16438	0.0844187	0.477145	0.318391	-0.091682	-0.510923	-0.464928
16439	-0.254898	0.0276725	0.102578	0.170407	0.152137	-0.240618
16440	-0.367414	-0.280855	-0.44455	0.652825	0.559892	-0.428652
16449	-1.1903	-0.757024	-0.977233	0.687027	0.628523	0.671899
16451	-1.10484	-0.651071	-0.699566	0.649092	0.635189	0.466687
16452	-0.402396	0.237415	-0.0863045	0.22117	-0.110257	0.0701178
16456	0.356683	0.950197	0.0351501	-0.766882	-0.558297	-0.517839
16476	-0.56297	-0.936906	-0.77425	0.607008	0.523034	0.535559
16477	-0.352839	-0.697716	-0.424369	1.05088	0.217864	-0.2561
16478	-0.833065	-0.371707	-0.71399	0.81542	0.630715	-0.0733077
16525	-0.0942693	0.129953	-0.30025	-0.0176695	0.18312	0.0638816
16529	0.476701	0.423802	0.619536	-0.797199	-0.451526	-0.790368
16536	0.390432	0.22015	-0.0079289	-0.187284	-0.193415	-0.307044
16548	0.278355	-0.192254	-0.042068	0.070703	0.0485679	-0.218828
16549	0.0358038	0.0634562	-0.427473	0.147136	0.162833	-0.035493
16551	0.664456	0.348209	0.240651	-0.670459	-0.700372	-0.249508
16553	-0.394681	-0.672857	-0.642379	0.519256	0.382091	0.439601
16560	0.251591	-0.116713	0.179211	-0.147793	-0.222765	0.0146882
16561	0.0740852	-0.142135	-0.014419	0.125683	-0.0305348	-0.120131
16563	0.0117652	0.310486	0.158022	-0.270102	-0.237911	-0.0303759
16564	-0.507238	-1.11659	-0.632316	0.662865	0.485785	0.484398
16568	-0.208491	-0.161982	-0.287831	0.0909914	0.133966	0.324427
16569	0.288164	-0.113121	0.181058	0.0657384	-0.231014	-0.248005
16570	-0.0589782	-0.394996	-0.185733	0.29755	0.277603	-0.0417639
16571	0.347384	0.180901	0.518422	-0.65615	-0.684679	-0.0379976
16574	0.163038	0.402715	0.480673	-0.604021	-0.469959	-0.211541
16579	0.0169468	0.205311	0.109036	-0.0852944	-0.0926569	-0.280103
16581	-0.378049	-0.396854	-0.81349	0.800482	0.443103	-0.0654346
16588	0.20313	0.112679	0.0113003	-0.195507	-0.0545408	-0.101447
16592	-1.33473	-1.15212	-1.27923	0.382471	0.979314	0.946765
16593	-0.275163	-0.155993	0.360135	-0.322562	-0.315495	0.422516
16594	0.179572	0.259921	0.109504	0.0398609	-0.387657	-0.286352
16599	-1.56972	-1.20372	-1.26994	0.957222	0.962263	0.49842
16601	-0.875424	-1.72574	-1.00447	0.691671	0.953074	0.584735
16646	-0.0173125	0.322475	0.418314	-0.319704	-0.216511	-0.308243
16647	-0.349515	-0.786863	-0.332957	-0.38932	-0.536814	1.55285
16648	-1.10046	-0.747473	-0.36404	0.397344	0.453282	0.739105
16653	-0.261346	-0.216955	-0.827542	0.330637	0.411834	0.30181
16661	-1.40597	-1.33602	-1.54005	0.698696	1.09764	0.715991
16664	-2.15271	-1.614	-2.3547	1.32752	1.61225	-0.245425
16665	-6.35902	-6.11204	-6.4111	1.71411	1.89314	0.0333117
16667	-5.39352	-5.37633	-5.66219	1.3901	2.10734	0.131763
16668	1.11637	0.705874	0.678765	-1.47268	-1.20795	-1.59349
16709	-0.808759	-0.68762	-0.473092	0.262905	0.675124	0.542158
16763	0.232089	0.697987	-0.0189906	-0.502704	-0.0960032	-0.571233
16765	-2.89291	-2.23385	-2.13363	0.803104	1.2419	1.16482
16768	0.391055	0.0777504	0.292292	-0.164626	-0.347657	-0.37065
16772	1.13234	0.972879	0.632642	-1.53839	-1.9783	-1.55091
16777	-1.08089	-0.776509	-0.647491	0.556831	0.664727	0.560666
16779	-0.316056	-0.144702	-0.452803	0.444778	0.163001	0.172722
16780	-2.33418	-1.99075	-2.53888	1.34179	1.28879	0.462299
16782	-1.46269	-1.15309	-1.58234	0.873436	0.610501	0.996
16783	0.545454	0.341701	0.285901	-0.497779	-0.474171	-0.473624
16784	-0.555276	-0.165527	-0.554936	0.29806	0.423705	0.281474
16792	-0.976272	-1.232	-0.959726	-0.243102	2.44683	-1.41368
16795	0.362201	0.687356	0.399237	-0.652604	-0.651325	-0.589036
16796	-0.0343782	-0.0717036	-0.201569	0.0829412	0.207949	-0.0330539
16800	0.402266	0.443159	0.484191	-0.588971	-0.768554	-0.343923
16801	0.0372062	0.0273354	0.0131493	0.0279471	-0.0171511	-0.105075
16816	0.0346323	-0.280563	-0.135414	0.273081	-0.116844	0.175031
16818	0.293284	0.760599	0.648892	-0.761517	-0.610968	-1.01541
16825	0.049904	-0.112587	-0.148762	0.00183165	0.027235	0.167142
16826	0.804884	0.512795	0.904647	-1.03081	-1.06313	-1.60878
16828	0.587114	0.338086	0.489398	-0.712835	-0.540619	-0.575658
16834	0.324323	0.262043	-0.0970636	0.0656451	-0.188255	-0.467603
16852	0.396929	-0.199106	-0.0256527	0.13316	0.311474	-0.844077
16855	-0.147629	-0.11914	-0.164185	0.232562	0.181315	-0.0342207
16865	0.227542	0.136011	0.346025	-0.292074	-0.232801	-0.344944
16871	0.385463	0.115175	0.296383	-0.252531	-0.171959	-0.510476
16881	0.174958	-0.0758508	0.0287768	-0.37016	-0.128549	0.124352
16882	-0.113556	0.107634	0.132865	0.121403	0.00113613	-0.280522
16885	-0.347043	-0.394592	0.118704	0.544892	0.00443049	-0.062929
16886	-0.474092	-0.57046	-0.534209	0.301841	0.259598	0.478476
16897	0.356758	0.305365	0.1745	-0.309845	-0.447841	-0.214997
16898	0.0175124	-0.48179	-0.49571	-0.460371	-0.563726	1.33951
16904	0.563318	-0.0355261	0.446975	-0.300143	-0.346596	-0.569936
16905	-0.25258	-0.529632	-0.380199	0.448049	0.673141	-0.271913
16906	-0.744713	-0.241739	-0.775089	-0.0908027	0.194175	1.07758
16907	0.396544	0.4049	-0.0018836	-0.333645	-0.353571	-0.2562
16909	0.697037	1.731	0.864013	-2.78666	-2.69886	-2.63354
16911	-0.989945	-0.70396	-0.873036	0.64584	0.666667	0.507645
16918	-1.70084	-1.83758	-1.67095	1.05653	0.863852	0.882054
16939	-0.226843	-0.100795	-0.102505	0.441617	0.369179	-0.539897
16949	-0.908555	-0.680745	-1.11615	0.623458	0.68439	0.575004
16956	0.566956	0.666779	0.717328	-1.0252	-0.842734	-0.96065
16971	-0.230145	1.21e-05	0.106065	0.15203	0.0083167	-0.0571026
16973	-0.191283	-0.0848186	-0.148828	0.0533308	-0.0616343	0.382261
16974	0.284624	0.0999787	0.61589	-0.276028	-0.384575	-0.574707
16976	1.31768	0.210334	0.607319	-0.984264	-1.11992	-1.41443
16977	0.296167	0.166116	0.465622	-0.247223	-0.28192	-0.584441
16978	0.177722	0.31154	-0.0717597	0.075549	-0.11528	-0.461015
16979	0.546759	-0.0228629	0.690036	-0.388189	-0.512839	-0.694763
16985	-0.413994	-0.666001	-0.87251	0.705849	0.922794	-0.319093
16987	0.111468	-0.0141818	0.00167327	-0.300041	0.275467	-0.118721
16993	-0.633225	-0.611753	-0.227027	0.4457	0.468529	0.260482
16998	-1.37435	-1.43253	-1.39611	1.11385	0.919817	0.429313
17025	0.184001	0.489948	-0.114189	-0.127247	-0.0541135	-0.507776
17035	0.00068452	0.359368	-0.0781445	-0.107104	-0.0525629	-0.163364
170439	-0.312188	-0.217399	-0.329985	0.370954	0.173588	0.208102
170459	0.386108	0.266182	0.0452173	-0.397597	-0.291698	-0.118387
170460	-0.531155	-0.352599	-0.747621	0.64019	0.530423	0.0675493
170472	-0.0161661	0.00475079	0.258453	-0.098415	-0.148486	-0.0232336
170625	0.282823	0.441958	0.231892	-0.466642	-0.4646	-0.209777
17063	0.349213	0.134773	0.211272	-0.275167	-0.299568	-0.211535
170658	0.00665061	-0.220553	-0.249091	0.0669939	0.247	0.105881
17069	0.472957	-0.280167	0.429618	-0.522439	0.0710068	-0.379335
170718	-0.0057465	0.0202358	-0.11798	-0.0868113	0.0578554	0.123117
170719	-0.56538	-0.26325	-0.0998544	0.541202	0.0826486	0.140343
170728	0.357934	0.247465	0.198421	-0.25021	-0.208031	-0.473391
170731	-0.112147	0.21379	-0.0331612	0.085429	-0.0380599	-0.135929
170737	-0.933989	-0.546613	-0.636519	0.59572	0.620045	0.354225
170742	0.14331	0.114495	-0.450001	-0.0736322	0.0925453	0.113855
170748	-0.483122	-0.49407	-0.488229	0.23581	0.287457	0.649987
170749	0.0941095	0.17739	-0.0142441	0.0432727	-0.0888534	-0.236045
170750	0.598926	0.197914	0.715307	-0.903574	-1.01605	-0.317127
170753	-0.862513	-0.80388	-0.72121	0.673349	0.44621	0.515499
170755	-0.175907	-0.395739	-0.295424	0.177556	0.0241609	0.438358
170756	0.133613	-0.0512319	-0.119368	-0.0545717	0.394599	-0.381084
170758	-0.455186	-0.520498	-0.939271	0.412363	0.479098	0.55744
170759	0.332249	0.248486	0.40317	-0.466618	-0.436875	-0.282099
170760	-0.200482	0.306075	0.013857	0.077054	-0.10606	-0.129427
170762	0.282959	0.0429739	0.178194	-0.219477	-0.392137	-0.000660165
170763	0.571039	0.0261681	0.502431	-0.426662	-0.566253	-0.421659
170765	-0.37605	0.693219	-0.305401	-0.211118	0.393249	-0.45318
170767	0.147328	-0.0596161	0.079371	-0.164001	0.0220005	-0.0390311
170770	-0.167713	-0.122915	-0.320049	0.23524	0.227842	0.0876711
170787	0.0796661	-0.140041	0.282417	-0.124953	0.107529	-0.249715
170789	-0.123015	-0.225782	-0.199526	-0.0110223	0.225802	0.276284
170822	-0.586319	-0.383368	-0.219611	0.549574	0.500046	-0.113848
170826	-1.07929	-1.03289	-0.722679	1.03159	0.802853	0.00896894
170833	-0.589501	-0.237837	-0.252852	0.304458	0.521364	0.0631994
17089	-0.0415545	-0.118311	0.407352	-0.38977	0.143958	-0.0850047
170930	-0.57038	-0.626541	-0.77073	0.207901	0.56917	0.699808
170942	-0.100798	-0.452056	-0.730429	0.238529	0.557586	0.223948
171095	0.329873	0.26352	0.319767	-0.193845	-0.227983	-0.691304
17113	0.246996	0.0379438	0.239036	-0.340771	-0.394109	0.0269618
17116	0.209524	0.285523	0.172753	-0.328915	-0.0753915	-0.353815
171166	0.577317	0.636643	0.7164	-1.25037	-1.14033	-0.486596
171167	0.600748	-0.0798365	0.378431	-0.373437	-0.161729	-0.60227
17118	-0.0801759	-0.128496	-0.286197	0.0106368	0.210994	0.226939
17120	0.181442	0.0220279	-0.12673	-0.0899373	0.205243	-0.226942
171207	-0.0301246	-0.150807	0.0673486	0.155697	0.166169	-0.239931
171212	0.630062	0.378796	0.4083	-0.688475	-0.521342	-0.688317
17122	-0.2616	-0.287269	-0.34974	0.213435	-0.0175885	0.556904
17125	-0.736307	-0.276865	-0.503196	0.517912	0.517801	0.122917
17126	0.166856	-0.0285424	-0.461193	0.0761825	-0.0010498	0.184216
17127	-0.528529	-0.226197	-0.905817	0.862149	0.146014	0.210686
17128	-0.268606	-0.270306	-0.188365	0.241827	0.343837	0.0583115
17129	-0.441395	-0.414413	-0.334554	0.450349	0.186707	0.293732
17130	0.304564	0.198793	0.181007	-0.326211	-0.54312	0.0190345
17133	0.1007	-0.122099	0.397702	-0.140435	0.111776	-0.44179
17134	-0.51406	-0.0832524	-0.342315	0.188419	0.269844	0.341688
171388	-0.306296	-0.191528	-0.333275	0.304193	0.325082	0.0285747
171429	0.283753	-0.185799	-0.0554972	0.187486	0.158489	-0.481793
171463	0.421707	0.614751	0.524018	-0.578689	-0.56727	-0.949083
17149	-0.288848	-0.16684	-0.326592	0.0406318	0.404387	0.233475
17150	-1.40339	-1.14252	-1.30815	0.557081	0.882836	0.848317
171508	-0.462016	-0.808614	-0.370785	0.346419	0.477398	0.464206
17151	0.164084	-0.0951049	-0.211536	0.119475	0.275448	-0.314375
171543	-0.211742	0.161222	-0.192743	0.135022	-0.236303	0.283945
17156	0.149919	0.065981	0.143684	-0.0604209	-0.304876	-0.0273998
171567	0.0658468	0.115934	0.121111	-0.354524	-0.268251	-0.0140424
17158	0.310175	0.653029	0.389901	-0.281314	-0.810312	-0.683847
171580	0.651281	0.618113	0.461299	-0.655426	-0.599612	-1.24437
17159	-0.0020924	0.0152013	0.02248	0.057915	-0.100897	0.00410287
17164	0.225958	0.207735	0.185674	-0.19795	-0.596941	0.0569463
17168	-0.0992578	0.441484	-0.169154	-0.079903	-0.0328458	-0.120071
17169	0.395266	0.254022	0.179359	-0.311778	-0.568912	-0.144031
17178	-4.13844	-4.14027	-4.50627	1.06486	1.52073	1.16242
17179	-0.540629	-0.683237	-0.5512	0.440328	0.538074	0.408412
17184	-0.34298	-0.311842	-0.300226	0.0954717	0.22238	0.462623
17187	0.152951	0.20047	-0.007765	-0.0293005	-0.102643	-0.244807
17189	-0.427568	-0.354877	-0.71678	0.181171	0.541188	0.466774
17190	-0.691202	-0.468266	-0.246539	0.474753	0.559723	0.0465549
17192	0.330815	-0.155739	0.0248022	-0.389284	-0.525198	0.52312
17193	0.315961	0.0936891	0.455364	-0.333979	-0.400788	-0.284214
17196	-0.101694	-0.145493	-0.107236	0.310465	0.0297647	-0.0580659
17207	0.0466611	0.162409	0.153509	-0.0473346	-0.109803	-0.247114
17210	0.201965	0.00512989	0.227066	-0.146688	-0.265423	-0.065546
17215	0.861958	-0.168864	0.27882	-0.89593	-1.03557	0.332414
17216	0.570215	0.41548	0.461253	-0.61795	-0.620082	-0.634554
17217	0.451252	0.351001	0.41874	-0.543905	-0.589326	-0.381335
17218	0.647666	0.35406	0.487201	-0.82814	-0.641247	-0.498997
17219	0.303209	0.140389	0.480505	-0.434737	-0.568112	-0.229048
17220	0.27488	0.26895	0.711086	-0.505368	-0.935686	-0.224387
17237	0.167198	0.560899	0.211811	-0.260987	-0.419945	-0.450904
17242	-0.297635	-0.380812	-0.565827	0.0214215	0.0458433	0.696874
17245	-0.394429	-0.395232	-0.0228825	0.141501	0.496725	0.038278
17246	0.0720582	0.199669	-0.00923175	-0.0561283	-0.188787	-0.0529442
17248	0.270514	-0.0079534	0.314017	-0.292648	-0.237296	-0.122587
17252	-0.315242	-0.153932	-0.532294	0.0357206	0.314351	0.482154
17256	0.32807	0.0870075	0.241408	-0.448395	-0.226309	-0.0806205
17257	-0.834516	-0.733944	-0.937717	0.698786	0.692761	0.392153
17258	-0.193341	-0.0871216	-0.0482108	0.130954	0.00061434	0.164803
17260	-0.461977	-0.374298	-0.0615004	0.250409	0.84241	-0.51773
17268	-1.63333	-0.516631	-1.55933	0.69775	0.892647	0.639293
17274	0.449672	0.17721	-0.060941	-0.342115	-0.160801	-0.192511
17279	0.3817	0.349652	0.337613	-0.67244	-0.690462	-0.160013
17281	-1.15574	-0.66607	-1.04271	0.76576	0.777582	0.394091
17283	0.23764	0.000292771	-0.0079276	-0.0684255	-0.105123	-0.0782351
17289	0.602898	0.595194	0.790433	-0.871374	-1.1508	-0.900207
17294	0.884783	1.18042	1.27525	-2.143	-2.88566	-3.27894
17299	0.356735	-0.08498	0.163225	-0.454755	-0.168238	0.0899011
17300	0.635099	0.669383	0.703359	-0.629258	-0.93216	-1.48561
17304	-1.1976	-0.583708	-1.20229	0.91243	0.732571	0.301413
17305	-0.741413	-0.715182	-0.263769	-0.262158	-0.0402264	1.3392
17308	0.262991	0.211657	0.273765	-0.210421	-0.275683	-0.36368
17314	0.0471342	-0.353205	-0.0936874	-0.152258	0.301417	0.1853
17318	-0.894583	0.255982	-0.692769	0.613919	0.252434	-0.0852996
17319	0.550443	0.0956304	0.0156628	-0.517291	-0.155113	-0.132202
17330	0.236161	0.246633	0.548155	-0.348545	-0.643153	-0.308218
17344	0.469571	0.246042	0.174629	-0.249469	-0.647479	-0.180483
17346	-0.503351	-0.436765	-0.538277	0.405355	0.635645	0.135192
17347	-0.378405	-0.258778	-0.660438	0.421034	0.369657	0.272287
17349	-0.446603	-0.766853	-0.514884	0.172689	0.683385	0.457647
17350	0.0708652	0.108743	0.63228	-0.38345	0.0725146	-0.759575
17354	0.334725	0.143221	0.666409	-0.58868	-0.623774	-0.244271
17355	0.940318	0.596971	0.696264	-0.91045	-1.30994	-1.30593
17380	0.954644	0.6415	0.615651	-0.510753	-1.32491	-1.88796
17385	-1.09412	-0.455995	-1.1291	0.896003	0.353807	0.566624
17387	-0.20457	0.485807	-0.206868	0.17932	0.0116872	-0.380479
17388	-0.0337801	0.3693	0.159055	-0.0497752	-0.108427	-0.416878
17390	1.01569	0.824822	0.929342	-1.30862	-1.48067	-2.54819
17420	0.592066	0.261807	0.222109	-0.592551	-0.525071	-0.221905
17425	0.306358	-0.0454924	-0.377752	-0.14071	-0.17853	0.342188
17427	0.877798	0.411833	0.855343	-1.72751	-1.35182	-0.475187
17434	-0.577259	-0.362887	-0.812315	0.495988	0.795234	0.00664008
17436	-0.04382	0.0290782	0.0547172	0.23761	-0.0342879	-0.335393
17448	0.00601148	-0.430766	-0.056873	0.150204	0.183347	0.0906992
17449	-0.299216	-0.634957	-0.311217	0.22198	0.361789	0.44218
17454	-0.312075	-0.642584	-0.361493	0.342651	0.250217	0.483441
17463	-0.53043	-0.64825	-0.434559	0.251522	0.220185	0.676527
17475	0.211517	0.29	0.102745	-0.176279	-0.446372	-0.0991268
17524	-0.80138	-0.828657	-0.830297	0.514132	0.777069	0.473275
17527	0.180594	0.0714737	-0.0701499	-0.298281	-0.0781707	0.117221
17532	0.421775	-0.194262	-0.0281033	0.214782	-0.0575757	-0.467766
17535	0.394812	0.317533	0.552113	-0.53511	-0.553935	-0.520505
17536	-0.423082	-0.0091161	-0.540137	0.253496	0.498552	0.041163
17537	0.194794	-0.308183	-0.0382889	-0.0257102	-0.190373	0.306594
17685	-0.0448113	0.313559	-0.0112515	-0.120423	0.0274973	-0.200828
17686	0.305059	0.0564869	0.469098	-0.43285	-0.335902	-0.240633
17688	0.217065	0.214754	0.344622	-0.352773	-0.37954	-0.161087
17713	0.239338	0.076268	0.0137925	-0.237294	0.136963	-0.278654
17714	-0.0684272	-0.0997895	-0.139184	0.183533	-0.0523745	0.154397
17748	-0.779988	0.20263	-1.08029	0.0734427	0.431459	0.626222
17749	-1.17259	-0.999471	-0.929397	0.0901214	1.18934	0.688658
17750	0.155418	0.248235	0.0861439	-0.33917	0.0492215	-0.26399
17755	0.348917	0.280054	0.664371	-0.467962	-0.572332	-0.731436
17756	-1.40229	-1.40314	-1.47195	0.580942	0.922879	1.00834
17758	0.490095	0.212868	0.144035	-0.440733	-0.0241822	-0.569828
17761	-0.581346	-0.53404	-0.625594	0.44906	-0.058507	0.889875
17765	-0.0173147	0.087564	-0.136074	0.0304911	-0.0254353	0.0536456
17766	-0.110713	0.295325	-0.176564	-0.100187	0.16524	-0.115196
17768	0.466219	0.604536	0.683145	-1.09076	-0.719186	-0.649384
17775	-0.131838	-0.529217	-0.773622	0.367304	0.218104	0.540752
17776	-0.0371731	0.292709	-0.0250184	-0.131534	-0.199147	0.0479994
17777	0.412681	0.339348	0.300206	-0.483511	-0.136659	-0.677699
17826	-0.546799	-0.437925	-0.54992	0.157548	0.30803	0.685918
17827	0.256385	0.0576016	0.153272	-0.386847	-0.259498	0.0532584
17828	-0.350836	0.0548596	-0.386668	0.253132	0.281587	0.0487407
17829	0.32378	-0.24379	-0.102696	-0.0165243	0.0588123	-0.0618681
17846	-0.498687	-0.701444	-0.711965	0.257862	0.583165	0.585591
17859	-2.05366	-1.72354	-1.46213	0.724376	1.01777	1.04873
17865	0.546223	0.171379	0.326425	-0.53538	-0.290576	-0.464159
17872	0.11174	0.70592	0.0753016	0.0138264	-0.262438	-0.992194
17873	0.553974	0.279762	0.258115	-0.209585	-0.1858	-1.05787
17874	-0.415789	-0.516638	-0.683481	0.563793	0.548533	0.151225
17876	-0.0428427	-0.036312	0.00586129	0.0164123	0.0877861	-0.0337542
17886	-0.234554	-0.516334	-0.487635	0.385468	0.233718	0.40754
17896	-0.106639	0.350385	1.27394	-0.743422	-0.534318	-1.08539
17904	0.066596	-0.265943	-0.413163	-0.0383484	0.19357	0.361983
17909	0.016139	-0.04463	0.0151026	-0.112132	-0.0291847	0.101589
17912	-0.778494	-0.477339	-0.337236	0.6103	0.6771	-0.101869
17913	0.385199	0.113413	-0.107659	0.00825785	-0.0357518	-0.449581
17918	0.134509	0.167749	0.159182	-0.018643	-0.266055	-0.220663
17920	-0.566238	-0.150028	-0.497244	0.513549	0.442864	0.0171392
17925	0.174367	0.080902	-0.16694	0.0124992	-0.0412643	-0.0800575
17929	0.172056	0.334095	0.00323426	-0.223891	-0.132806	-0.211449
17936	-0.467769	-0.214819	-0.286718	0.371442	0.320269	-0.0145539
17938	-0.650844	-0.775064	-0.849275	0.196815	0.352647	0.974457
17955	0.166047	-0.0264737	-0.0875927	-0.130902	0.0940083	-0.0296209
17957	-0.312365	-0.296457	0.0105494	0.416556	0.389021	-0.354057
17961	-0.597678	-0.636405	-0.660325	0.41607	0.734446	0.291249
17965	-2.80918	-3.30671	-3.45866	1.19726	1.32698	1.00239
17966	0.17537	-0.0984855	0.137998	-0.112385	-0.266543	0.115703
17973	-0.0643144	-0.0315307	0.0644286	0.0356845	0.199797	-0.227621
17974	-0.978054	-0.643818	-0.880336	0.385393	0.656252	0.733567
17975	0.413953	0.204459	0.547614	-0.681063	-0.285578	-0.508399
17977	-0.844007	-0.600146	-0.505329	0.962584	0.218258	0.234612
17978	-0.278203	0.0235117	0.00574723	-0.0183425	-0.0245716	0.258326
17979	0.114651	0.121018	-0.039092	0.139698	0.114856	-0.527468
17984	-0.0005408	0.141224	0.0298028	-0.245812	0.104619	-0.0510267
17988	-0.191472	0.525684	0.130537	0.17026	0.210607	-1.30081
17991	-0.618988	-0.820717	-0.829957	0.326645	0.738204	0.588858
17992	-0.0801583	-0.130636	-0.0863185	-0.396631	0.185432	0.416893
17993	-1.18137	-0.934094	-1.28066	0.383007	0.994261	0.749898
17995	0.0396854	-0.053177	-0.100466	-0.0907598	0.0829279	0.112048
17997	-0.116291	0.226367	0.0117634	-0.0678422	-0.0359904	-0.034755
17999	-0.272091	-0.235265	-0.0502911	0.262757	0.118322	0.123612
18000	-0.109288	0.141113	-0.245818	0.0539489	0.0965276	0.039203
18002	0.173762	-0.152111	-0.265241	-0.263514	0.176123	0.263417
18003	-1.26047	-0.65084	-1.06946	0.734722	0.735077	0.523633
18007	-0.1777	0.132661	0.227525	-0.0007622	-0.254149	0.0340645
18008	-0.328618	-0.0931367	-0.182802	0.136564	0.362449	0.0359947
18010	0.0276346	0.531725	-0.0266486	-0.33737	-0.215016	-0.0853575
18011	0.778322	0.707025	0.758233	-0.974577	-1.24984	-1.2874
18013	0.517272	-0.286626	0.161441	0.00096393	-0.056221	-0.476076
18015	0.0514445	0.0856361	0.21849	0.0200817	0.0510897	-0.495742
18018	0.148018	0.161164	0.329004	-0.273026	0.0329169	-0.556533
18020	-0.427235	-0.0532716	-0.072293	0.151438	0.179405	0.160314
18021	0.182094	0.270515	0.0569805	-0.0527577	-0.304378	-0.209729
18023	0.0257111	0.26459	0.196178	-0.0679246	-0.34628	-0.129794
18024	-0.626978	-0.946541	-1.10381	0.273455	0.552122	0.993232
18025	-1.51746	-1.12585	-1.04836	1.13962	0.951266	0.113031
18028	-4.09401	-3.67577	-3.958	1.27566	1.66401	0.70709
18030	0.254707	-0.113947	0.24095	-0.0344815	-0.272487	-0.127326
18033	0.0123924	0.0873058	-0.282032	0.271601	-0.0095974	-0.120123
18034	0.035216	0.0869241	0.322784	-0.0649778	-0.158363	-0.271518
18035	-0.568158	-0.447925	-0.833531	0.493113	0.0512039	0.82074
18036	0.204821	0.290781	0.276051	-0.384784	-0.257796	-0.237834
18041	0.0695421	-0.0723629	0.124438	0.0454019	-0.0113308	-0.288171
18045	0.229397	-0.0327703	0.057064	-0.272834	0.0230441	-0.0344974
18046	-0.10442	0.0660027	-0.108806	-0.0346377	0.107873	0.0638308
18049	0.334311	0.197803	0.221698	-0.14766	-0.207362	-0.520842
18053	-0.0524455	1.04575	0.29097	-0.101459	-0.570724	-1.3298
18074	1.32037	1.05521	1.10878	-2.82314	-3.23781	-3.04075
18080	0.844291	0.330247	0.535873	-0.764264	-0.839602	-0.990369
18082	-0.499457	-0.228466	-0.399567	-0.113903	0.300443	0.698014
18096	-0.22386	-0.668015	0.119619	0.456017	0.204717	-0.0609839
18099	0.329549	0.245887	0.172114	-0.192887	-0.146388	-0.590079
18100	0.282973	-0.0116684	-0.311083	-0.151435	0.208298	-0.0744373
18102	0.0892218	0.128011	0.051472	-0.320536	-0.0606074	0.0805719
18103	-0.198398	-0.419239	-0.515051	-0.00993417	0.16539	0.734545
18105	0.368205	0.144922	0.296319	-0.445131	-0.117707	-0.399836
18107	0.331687	0.33208	0.38379	-0.45519	-0.291129	-0.511475
18111	-2.58647	-3.09967	-2.65389	0.726313	0.765292	1.80791
18120	0.211875	-0.125744	-0.1508	-0.230945	0.155001	0.0263542
18128	-1.31595	-0.970809	-0.793197	0.763217	1.00481	0.22769
18131	-0.442928	0.0267784	-0.458818	0.347631	0.172105	0.21764
18132	0.651327	0.716538	0.623508	-1.14906	-0.876691	-0.894834
18139	-0.474422	-0.362631	-0.067642	0.324546	0.344737	0.0994771
18140	-0.270125	-0.213593	-0.111962	0.0160574	0.121516	0.389152
18141	0.722113	0.313604	0.502697	-0.694222	-0.731861	-0.663116
18148	0.47055	-0.0740755	-0.0605596	-0.378173	-0.030163	-0.0143591
18150	-0.777529	-1.16882	0.0821418	0.839576	0.11975	0.202179
18162	0.118998	0.160715	-0.02576	0.694198	-0.507083	-0.742292
18173	-0.957424	-0.702659	-0.499063	0.205828	1.02599	0.289005
18174	0.26109	-0.199105	-0.118511	0.193154	0.0493492	-0.236165
18176	-0.391201	-0.348445	-0.410993	0.182651	0.442762	0.34373
18181	0.0532337	0.116684	-0.184314	-0.0638069	0.0753932	-0.0110556
18186	1.04651	0.96358	1.10567	-1.78302	-2.13872	-2.81462
18187	0.416094	0.2378	0.226753	-0.338381	0.0396616	-0.819919
18193	-0.131759	-0.256722	-0.144895	0.101972	0.197395	0.0293039
18194	-0.18922	-0.572821	-0.285328	-0.172082	-0.309164	1.02766
18195	0.357213	0.580516	0.139965	-0.436385	-0.277784	-0.623819
18201	0.348103	0.812164	0.182234	-0.463185	-0.818257	-0.513552
18203	-0.685927	-0.823604	-0.879206	0.460114	0.633178	0.637542
18207	0.534489	0.262219	-0.0776607	-0.312433	0.00997579	-0.604425
18220	0.246888	0.522942	0.00522174	-0.347763	-0.137958	-0.448887
18221	0.60498	0.0903192	0.155735	-0.693054	-0.531138	0.0544443
18222	0.408486	0.0766017	0.166575	-0.411743	-0.311652	-0.0357273
18223	0.222823	-0.0950386	-0.102516	-0.10301	0.150174	-0.0984394
18226	0.0554758	0.170629	-0.090111	-0.289782	0.200096	-0.0857489
18227	0.166453	0.0622749	0.0342533	-0.0791247	0.0555672	-0.265178
18230	-0.538541	-0.341046	-0.571597	0.444056	0.467188	0.262684
18242	0.887388	0.461071	0.672927	-0.900552	-1.00736	-1.10556
18245	0.0435975	-0.0837975	-0.0326184	-0.195271	-0.0806253	0.313207
18247	0.162188	0.0161916	-0.0521278	0.0161382	0.0477928	-0.207397
18260	-0.588922	-0.512347	-0.463604	0.605213	0.221055	0.416397
18263	0.637561	0.516172	0.571256	-0.80982	-0.77718	-0.780621
18286	0.121111	0.440689	0.253944	-0.402183	-0.21651	-0.339912
18293	0.282007	0.339948	-0.0221475	-0.206772	0.0576729	-0.582186
18389	-0.343881	0.230953	0.0140881	0.226206	0.032651	-0.222742
18391	0.174515	0.0753036	0.402873	-0.469702	-0.418978	-0.0360825
18392	0.724885	0.472243	0.983757	-1.16436	-1.12639	-1.10434
18400	0.178171	-0.0305618	-0.0581193	0.0784888	0.343853	-0.639586
18408	0.315511	0.378296	0.278586	-0.337687	-0.371147	-0.438673
18412	-0.146727	-0.268899	-0.233883	0.0899879	0.0367236	0.440991
18414	0.214599	0.00554782	0.0735279	-0.0732836	-0.172011	-0.0695105
18417	0.903969	1.26293	0.921954	-1.70807	-2.39728	-2.49318
18423	-0.745601	-1.37324	-0.653843	2.09357	-0.805708	-0.228701
18426	0.0275521	0.106365	-0.030008	0.0277224	0.168624	-0.335507
18432	0.595372	0.108308	0.445955	-0.796858	-0.657354	-0.0973085
18440	0.253804	0.240307	0.398481	-0.28417	-0.352896	-0.404688
18451	0.16307	0.401749	0.432232	-0.366544	-0.190494	-0.66362
18452	0.328598	0.308363	0.507443	-0.568176	-0.206089	-0.653981
18453	0.657397	0.412742	0.411821	-0.703572	-0.588508	-0.650534
18457	-0.474461	-0.231711	-0.0146692	0.179459	0.308472	0.13618
18458	0.132182	0.00098465	0.238121	-0.553375	-0.402682	0.347451
18472	-0.221533	-0.120099	-0.230057	-0.0518443	0.225863	-0.0984078
18476	-0.0789299	-0.177285	-0.575943	0.190756	0.387647	0.124204
18477	0.156887	0.0884102	0.247628	-0.371464	-0.0877096	-0.111256
18479	0.259417	0.0446293	0.520735	-0.471424	-0.415954	-0.108892
18481	0.00061417	-0.584456	0.424518	-0.129306	-0.166352	0.304933
18483	-0.131781	0.0631297	-0.117557	0.0816408	-0.0229232	0.100887
18484	-1.14259	-1.04987	-0.884431	0.558951	0.604314	0.889548
18488	0.211489	0.0488394	0.0693608	0.00188684	-0.13651	-0.222755
18514	-0.149853	-0.035389	-0.216471	0.410989	0.116639	-0.19349
18515	-0.086344	-0.387088	-0.36855	0.261378	0.134132	0.24773
18516	0.862512	0.123827	0.713852	-0.954009	-1.17898	-0.40533
18518	0.0535509	-0.333456	-0.25249	0.0765153	0.22808	0.167462
18521	-0.271204	-0.384774	0.13627	0.0697128	0.177223	0.200583
18537	-0.560708	-0.688598	-0.599848	0.270483	0.355654	0.713427
18538	-1.18633	-0.986075	-0.587071	0.298107	0.931397	0.631377
18550	0.0270445	0.166989	0.0667579	0.0854144	0.0502075	-0.492604
18551	-0.582777	-0.601475	-0.370103	0.342743	0.650481	0.234459
18554	0.309905	0.113309	-0.0366907	-0.214878	0.0776557	-0.308605
18555	-0.227473	-0.0234698	-0.179093	0.309671	0.115131	-0.039946
18567	0.0438387	0.153684	0.106379	-0.281836	-0.0963055	0.0450448
18569	-1.50732	-1.23884	-1.2404	0.703075	1.15088	0.537296
18571	0.229088	0.0767479	-0.0305297	-0.559528	-0.505144	0.571856
18574	0.719727	0.574066	0.494173	-0.465867	-0.73846	-1.42143
18582	-0.554213	-0.364006	-0.620652	0.191456	0.222513	0.680663
18583	0.116097	-0.0524566	0.300103	-0.0495478	-0.524261	0.120084
18590	-0.779811	-0.712862	-0.959066	0.454867	0.652559	0.653338
18591	0.473457	-0.0244616	0.0343488	-0.184278	0.0674328	-0.480064
18595	-0.298054	-0.463129	-0.0971612	0.955987	0.00467855	-0.430541
18597	0.62179	0.528991	0.629945	-0.72326	-0.862632	-0.893158
18605	0.274641	1.31477	0.0484967	-0.635916	-0.698728	-1.24454
18606	-1.47108	-1.59002	-1.13492	0.882473	0.892239	0.712595
18607	0.317996	0.16303	0.147726	-0.181459	-0.242661	-0.315373
18612	0.926645	0.910367	1.03987	-1.72305	-1.66917	-2.13092
18616	1.02755	0.751926	0.935899	-1.66475	-2.14993	-1.21677
18618	0.363059	0.22104	0.526819	-0.680523	-0.337981	-0.356523
18624	0.55778	0.339243	0.356027	-0.383323	-0.514123	-0.679205
18626	0.279542	0.100544	0.290536	0.0184135	-0.36959	-0.438288
18627	-0.335533	-0.311006	0.000161925	0.510427	0.0794585	-0.0621466
18631	-0.0476606	-0.348395	-0.133106	0.215054	0.509701	-0.329718
18632	-0.0270706	-0.0078904	0.0556253	0.0392973	0.182195	-0.267394
18633	0.119086	-0.199665	-0.309969	0.31416	0.17634	-0.1712
18634	-0.125558	0.0228313	0.105456	0.0440361	-0.0905102	0.0210339
18637	-0.0612326	-0.171994	-0.51876	-0.2115	0.221232	0.574935
18640	-1.12617	-0.463363	-0.850999	0.891513	0.634873	0.153606
18641	0.447224	0.134723	0.409343	-0.404271	-0.395291	-0.493674
18642	0.173225	0.0171103	0.131469	-0.139495	-0.124172	-0.0925273
18643	-0.609909	-0.772735	-0.603804	0.0433738	0.216327	1.02673
18645	-1.75609	-1.23464	-1.53048	0.744036	0.949956	0.89213
18646	-1.81128	-1.09182	-1.71412	0.0806642	1.63574	0.698097
18647	-0.0637138	0.406296	0.172229	-0.103627	-0.251711	-0.235684
18648	0.429288	0.24872	0.375177	-0.653865	-0.612755	-0.0552995
18674	-0.715232	-0.391463	-0.232977	0.190219	0.48245	0.330763
18676	-1.11262	-1.1972	-1.116	0.89562	0.396824	0.894433
18679	-0.449533	-0.222118	0.0488302	0.34974	0.0089582	0.171471
18685	0.315531	0.130702	0.0165746	-0.0892247	-0.131518	-0.29497
18700	0.0838757	0.0256398	0.209808	-0.103747	-0.0131609	-0.238976
18701	-0.360527	-0.774266	-0.713398	0.116505	0.699214	0.566433
18704	0.493084	0.58703	0.129967	-0.813672	-0.671325	-0.113493
18706	-0.473791	-0.272509	-0.117558	0.115995	0.0697431	0.535849
18708	-1.62328	-0.872252	-1.3857	0.856257	0.931557	0.557011
18709	-0.605721	-0.502781	-0.442934	0.489281	0.428942	0.30598
18710	-0.351717	0.210095	0.001929	0.140658	-0.21967	0.158989
18719	0.588399	0.38292	0.118382	-0.41889	-0.606744	-0.351324
18720	0.450547	0.29732	0.520506	-0.29107	-0.761176	-0.564976
18738	-0.522934	-0.363985	-0.276453	0.410021	0.274105	0.293764
18739	0.134718	-0.11924	0.331509	-0.145072	-0.288053	0.0290293
18741	0.0150752	0.853235	0.710857	-0.419318	-0.631842	-1.33505
18744	0.262836	0.193259	0.260089	-0.255454	-0.217948	-0.334432
18746	0.493233	0.323437	0.291227	-0.649749	-0.2	-0.522941
18747	0.0236575	-0.00386048	-0.0129629	-0.0479214	-0.073554	0.106514
18749	-0.114567	0.202777	-0.0911452	-0.0182688	0.00554263	0.00105587
18753	-0.187903	0.0307765	-0.228074	0.115649	0.298066	-0.0738316
18755	0.291807	-0.222338	-0.332343	0.487867	-0.0678113	-0.289577
18760	0.24044	0.71525	0.658817	-0.648009	-0.868609	-0.69722
18762	0.637139	0.658881	0.47226	-0.632895	-0.915462	-0.934936
18763	0.0689677	-0.159246	0.00525225	0.104472	-0.248721	0.196728
18764	0.0823752	0.0263443	0.00981645	-0.0134067	-0.280749	0.150653
18767	-0.136318	0.00305121	-0.0398747	0.195617	0.00082687	-0.0371791
18769	-0.194093	0.262235	0.0201063	-0.403006	-0.0518379	0.231693
18771	-0.354956	-0.357215	-0.185454	0.204269	0.246362	0.323327
18772	0.211041	0.0368407	-0.0904416	-0.0489411	0.611879	-1.0601
18777	-1.27695	-1.37989	-1.35376	0.370268	0.431876	1.35111
18786	-0.364594	0.149785	0.0699709	-0.025507	0.108817	0.0221826
18789	0.0941432	0.0769694	0.388822	0.0722224	-0.257481	-0.481791
18797	-0.677685	-1.06299	-0.70382	0.693359	0.57495	0.480968
18798	-0.17052	-0.340328	-0.0808354	0.124969	0.0998793	0.304791
18799	0.0122814	0.300837	-0.398256	0.518196	-0.434186	-0.167899
18805	-0.172339	-0.260544	-0.0262763	0.642837	0.0999767	-0.451852
18807	0.488268	0.358498	-0.0728212	-0.282676	-0.277871	-0.396695
18810	-0.696477	-0.603035	-0.847136	0.602525	0.569032	0.41625
18813	0.0606087	0.0700483	0.277139	-0.428107	0.117728	-0.168204
18817	0.584915	0.623262	0.399427	-0.604039	-0.41506	-1.23582
18822	0.482151	0.605837	0.505933	-0.668188	-0.681705	-0.778048
18824	0.288558	-0.0689205	-0.486416	-0.249033	0.135102	0.271645
18845	0.753694	1.00002	0.799447	-1.20569	-1.43756	-1.77149
18854	-0.375417	0.0261959	0.19097	-0.269358	-0.451547	0.670263
18858	1.70966	0.808833	1.04004	-3.26613	-3.19992	-4.04161
18861	-0.0108895	0.377539	0.485089	-0.225127	-0.182664	-0.643353
18933	0.361869	0.142584	0.233137	-0.00779206	-0.283375	-0.599228
18950	0.726744	0.327453	0.706597	-1.08875	-0.918848	-0.511709
18969	0.481247	0.408719	0.472742	-0.498751	-0.602976	-0.63144
18970	0.483986	0.270357	0.474206	-0.495059	-0.358837	-0.687514
18971	0.70757	0.39741	0.419988	-0.871066	-0.622218	-0.543841
18972	0.0367827	-0.394437	-0.226273	-0.283407	-0.0337359	0.714661
[truncated: 5,867 more rows]

## Sheet: SAM selected genes
Up-regulated genes								Down-regulated genes
Gene ID	Gene	Score(d)	Numerator(r)	Denominator(s+s0)	Fold Change	q-value(%)		Gene ID	Gene	Score(d)	Numerator(r)	Denominator(s+s0)	Fold Change	q-value(%)
17178	Fxyd3	14.1019	5.51099	0.390797	45.601	0		20527	Slc2a3	-16.1368	-7.24679	0.449086	0.006584	0
26362	Axl	13.5977	4.42953	0.325756	21.5487	0		14472	Gbx2	-14.2987	-5.09221	0.356132	0.029315	0
54630	Prickle3	12.8391	3.60037	0.280423	12.1288	0		99377	Sall4	-13.5246	-6.29864	0.465716	0.012703	0
13179	Dcn	12.703	6.16764	0.485528	71.8861	0		23831	Car14	-12.5408	-5.06267	0.403694	0.029922	0
210044	Adcy2	12.3676	5.49971	0.444686	45.2459	0		27205	Podxl	-12.134	-4.08084	0.336314	0.059094	0
16206	Lrig1	12.1547	3.71187	0.305385	13.1034	0		18074	Nid2	-11.9694	-4.19535	0.350506	0.054585	0
192212	Prom2	11.7032	4.08871	0.349367	17.0147	0		68895	Rasl11a	-11.819	-3.15053	0.266564	0.112615	0
54139	Irf6	11.4109	3.8817	0.340175	14.7404	0		234779	Plcg2	-11.2895	-3.33011	0.294973	0.099435	0
11658	Alcam	11.2465	4.72297	0.419951	26.4093	0		15377	Foxa3	-11.1586	-4.07373	0.365075	0.059386	0
223227	Sox21	11.1073	3.30331	0.297401	9.87179	0		29857	Mapk12	-10.4307	-3.33588	0.319812	0.099038	0
72685	Dnajc6	11.076	4.2389	0.382709	18.8815	0		26564	Ror2	-10.2148	-4.58577	0.448935	0.041643	0
330260	Pon2	10.9342	3.12798	0.286072	8.74212	0		14536	Nr6a1	-10.109	-4.90664	0.485373	0.033339	0
54670	Atp8b1	10.91	3.76148	0.344774	13.5618	0		12759	Clu	-10.0094	-2.64104	0.263855	0.160313	0
107587	Osr2	10.8072	3.78112	0.349871	13.7477	0		64075	Smoc1	-9.98209	-4.57303	0.458124	0.042013	0
19242	Ptn	10.4326	2.88648	0.276678	7.39466	0		19289	Punc	-9.85419	-5.13651	0.521251	0.028429	0
17965	Nbl1	10.3094	4.36706	0.4236	20.6355	0		209268	Igsf1	-9.62561	-2.94269	0.305714	0.130066	0
67017	2010011I20Rik	10.3071	4.11044	0.398797	17.273	0		268527	Greb1	-9.57707	-2.57827	0.269213	0.167441	0
319478	Cxxc4	10.2192	2.80115	0.274106	6.96998	0		104174	Gldc	-9.48477	-3.48398	0.367323	0.089375	0
18028	Nfib	10.0506	5.12485	0.509903	34.8926	0		239435	Aard	-9.39334	-3.83127	0.407871	0.070254	0
66793	Efcab1	9.91653	3.30619	0.333402	9.89152	0		74096	Hvcn1	-9.33066	-3.22087	0.345192	0.107256	0
268860	Abat	9.85837	3.16842	0.321393	8.99059	0		56380	Arid3b	-9.00365	-3.62358	0.402456	0.081133	0
192897	Itgb4	9.80353	4.81798	0.491454	28.207	0		236920	Stard8	-8.97842	-5.45575	0.607651	0.022785	0
15507	Hspb1	9.73215	4.46617	0.458909	22.103	0		21386	Tbx3	-8.7327	-4.19617	0.480512	0.054554	0
19273	Ptpru	9.6265	3.01448	0.313144	8.08069	0		13436	Dnmt3b	-8.71919	-3.82808	0.439041	0.07041	0
223473	Npal2	9.6122	3.51973	0.366173	11.4695	0		13482	Dpp4	-8.69053	-2.85488	0.328505	0.138228	0
223650	Eppk1	9.49083	3.62301	0.381737	12.3206	0		19223	Ptgis	-8.65371	-4.00749	0.463095	0.062176	0
16918	Mycl1	9.33852	2.6706	0.285977	6.36694	0		14778	Gpx3	-8.50453	-4.22081	0.496301	0.05363	0
16665	Krt15	9.32084	7.50758	0.805461	181.972	0		106042	Prickle1	-8.47599	-3.42227	0.403761	0.093281	0
269615	Plch2	9.21492	4.23682	0.459779	18.8543	0		21350	Tal2	-8.4361	-2.39681	0.284114	0.189884	0
68024	Hist1h2bc	9.17941	3.11517	0.339365	8.66484	0		13808	Eno3	-8.35927	-3.0923	0.369925	0.117253	0
20423	Shh	9.07959	3.9761	0.437916	15.7371	0		106952	Centd3	-8.33906	-3.62856	0.435128	0.080853	0
14797	Aes	9.04579	3.35256	0.37062	10.2146	0		14199	Fhl1	-8.19697	-3.72338	0.454239	0.07571	0
15376	Foxa2	8.97401	3.12682	0.34843	8.73505	0		237253	Lrp11	-8.15889	-3.71118	0.454863	0.076353	0
55948	Sfn	8.97121	3.76303	0.419457	13.5764	0		83436	Plekha2	-8.13111	-3.5915	0.441699	0.082957	0
13823	Epb4.1l3	8.93222	2.71052	0.303454	6.54556	0		58198	Sall1	-8.11291	-2.59225	0.319522	0.165827	0
109857	Cbr3	8.79296	4.06742	0.462577	16.7655	0		226352	Epb4.1l5	-8.11125	-2.76556	0.340953	0.147057	0
67198	2810022L02Rik	8.56269	2.8183	0.329137	7.05329	0		29859	Sult4a1	-8.10049	-4.32529	0.533955	0.049884	0
103712	6330403K07Rik	8.53007	2.89711	0.339635	7.44931	0		20393	Sgk	-8.00405	-3.10246	0.387612	0.11643	0
22269	Upk2	8.50083	4.133	0.486188	17.5451	0		319520	Dusp4	-8.00139	-2.07189	0.258942	0.237847	0
667250	LOC667250	8.4922	3.46155	0.407616	11.0162	0		18858	Pmp22	-7.97367	-4.68873	0.588027	0.038775	0
16667	Krt17	8.45699	6.68708	0.790717	103.041	0		218038	Amph	-7.96585	-3.46577	0.435079	0.09051	0
68943	Pink1	8.34741	3.1215	0.373949	8.70293	0		19663	Rbpms	-7.89974	-2.70179	0.34201	0.153702	0
72930	Ppp2r2b	8.13999	4.04913	0.497437	16.5543	0		107449	Unc5b	-7.86835	-3.21735	0.408898	0.107518	0
56149	Grasp	8.13649	3.07082	0.377414	8.40253	0		18612	Etv4	-7.83636	-2.80001	0.35731	0.143586	0
70456	Brp44	8.11034	2.85286	0.351756	7.22433	0		434784	Ldoc1	-7.77743	-3.88382	0.49937	0.067742	0
13631	Eef2k	7.91846	3.44805	0.435444	10.9135	0		140580	Elmo1	-7.75733	-3.73704	0.481744	0.074996	0
213649	Arhgef19	7.90557	3.17097	0.401105	9.0065	0		12447	Ccne1	-7.71691	-2.58097	0.334457	0.167128	0
16432	Itm2b	7.88633	2.64158	0.334956	6.24014	0		14171	Fgf17	-7.66594	-4.32199	0.563791	0.049998	0
58521	Eid1	7.80337	2.73453	0.350429	6.65541	0		67451	Pkp2	-7.47912	-2.3156	0.309608	0.200879	0
80888	Hspb8	7.77412	2.83842	0.365111	7.15236	0		14620	Gjb3	-7.39938	-3.22266	0.435531	0.107123	0
98303	D630023F18Rik	7.75365	2.23798	0.288636	4.71736	0		14584	Gfpt2	-7.25919	-3.51282	0.483913	0.087607	0
13709	Elf1	7.74248	2.87092	0.370802	7.31534	0		238323	Rps6kl1	-7.24444	-2.80693	0.38746	0.142899	0
110842	Etfa	7.73177	2.5851	0.334347	6.00056	0		13723	Emb	-7.24279	-4.87618	0.673246	0.034051	0
12192	Zfp36l1	7.69497	2.41872	0.314325	5.34696	0		12006	Axin2	-7.18428	-2.65442	0.369476	0.158833	0
105559	Mbnl2	7.68722	3.3745	0.438975	10.3711	0		16909	Lmo2	-7.18379	-3.8037	0.529485	0.07161	0
217430	Pqlc3	7.67403	2.14667	0.279732	4.42805	0		19094	Mapk11	-7.17614	-2.41621	0.3367	0.187348	0
19241	Tmsb4x	7.58567	2.74432	0.361777	6.70073	0		67800	Dgat2	-7.12262	-2.23365	0.313599	0.21262	0
98845	Eps8l2	7.5516	2.68275	0.355256	6.42079	0		66120	Fkbp11	-7.11758	-3.32623	0.467327	0.099702	0
11302	Aatk	7.54732	2.1425	0.283876	4.41527	0		12705	Cited1	-7.10481	-2.16649	0.304932	0.222753	0
100689	Spon2	7.54304	2.4207	0.320918	5.3543	0		74720	4930511J11Rik	-7.0887	-2.85047	0.402114	0.138651	0
20238	Atxn1	7.50806	2.88246	0.383915	7.37406	0		71446	Wrb	-7.0237	-1.69404	0.241189	0.309061	0
12306	Anxa2	7.50614	2.95358	0.393489	7.74671	0		11989	Slc7a3	-7.01781	-3.57165	0.50894	0.084106	0
231086	Hadhb	7.49828	2.87375	0.383254	7.32967	0		252903	Ap1s3	-6.9935	-1.75576	0.251055	0.296118	0
15402	Hoxa5	7.48389	3.18794	0.425974	9.1131	0		22673	Zfp185	-6.95645	-1.91851	0.275789	0.264527	0
109778	Blvra	7.38663	2.44888	0.331528	5.4599	0		225631	Onecut2	-6.94532	-1.92314	0.276898	0.26368	0
216440	Os9	7.36912	1.86189	0.252661	3.63483	0		17294	Mest	-6.94384	-3.88269	0.559156	0.067795	0
20674	Sox2	7.33564	3.71973	0.507077	13.175	0		52187	Rragd	-6.9033	-4.27612	0.61943	0.051613	0
12569	Cdk5r1	7.29992	2.81786	0.386012	7.05113	0		72599	Pdia5	-6.80812	-2.40981	0.353962	0.18818	0
16765	Stmn1	7.27335	3.49007	0.479844	11.2361	0		69219	Ddah1	-6.75167	-2.9971	0.443904	0.125252	0
22061	Trp63	7.27036	5.37232	0.738935	41.422	0		18417	Cldn11	-6.73552	-3.22913	0.479418	0.106644	0
15586	Hyal1	7.26598	2.84331	0.391319	7.17666	0		243963	Zfp473	-6.73011	-1.99086	0.295814	0.251589	0
72433	Rab38	7.26275	2.81364	0.387407	7.03056	0		21664	Phlda1	-6.70872	-3.25048	0.484515	0.105077	0
15220	Foxq1	7.23588	4.11152	0.568213	17.2859	0		54409	Ramp2	-6.69777	-3.69314	0.5514	0.077313	0
213484	Nudt18	7.20566	2.38761	0.331352	5.23289	0		546049	C330021F23Rik	-6.65877	-3.11386	0.467632	0.115514	0
20195	S100a11	7.20222	4.29476	0.59631	19.6269	0		104156	Etv5	-6.64914	-2.45617	0.369396	0.18223	0
214791	Sertad4	7.1779	3.57985	0.498731	11.9575	0		224860	Plcl2	-6.64345	-1.92527	0.2898	0.26329	0
58187	Cldn10	7.15002	4.30788	0.6025	19.8062	0		218952	Plekhc1	-6.60157	-1.93662	0.293357	0.261228	0
65963	Tmem176b	7.04435	2.87499	0.408127	7.33598	0		242662	Rims3	-6.59889	-2.1259	0.322161	0.229107	0
77045	Bcl7a	7.03497	1.92759	0.274001	3.8042	0		100019	Mdn1	-6.59402	-1.95892	0.297075	0.257222	0
23934	Ly6h	7.02887	2.72032	0.387021	6.5902	0		320145	Sp8	-6.58724	-2.74991	0.417459	0.148661	0
140742	Sesn1	7.02515	2.78282	0.396123	6.88197	0		226419	Dyrk3	-6.58186	-1.70604	0.259203	0.3065	0
12226	Btg1	6.97382	3.13941	0.45017	8.81162	0		22153	Tubb4	-6.51454	-2.05711	0.315773	0.240297	0
27425	Atp5l	6.90549	2.83608	0.410699	7.14075	0		69159	Rhebl1	-6.48679	-1.972	0.304002	0.2549	0
72169	Trim29	6.89222	3.8797	0.56291	14.72	0		22416	Wnt3a	-6.47913	-3.7005	0.571142	0.07692	0
71908	Cldn23	6.89026	3.19773	0.464094	9.17515	0		106572	Rab31	-6.4439	-1.92256	0.298353	0.263787	0
12224	Klf5	6.84392	2.95215	0.431354	7.73904	0		50528	Tmprss2	-6.43218	-2.23941	0.348157	0.211773	0
20365	Serf1	6.84133	3.01619	0.440878	8.09029	0		18186	Nrp1	-6.42301	-3.28404	0.511294	0.102661	0
67729	Mansc1	6.82833	1.99328	0.291913	3.98141	0		384783	Irs2	-6.4204	-2.35778	0.367232	0.195092	0
19266	Ptprd	6.82742	2.85509	0.418179	7.23548	0		105348	Golm1	-6.40704	-1.99937	0.312058	0.250109	0
16363	Irf2	6.78089	2.83949	0.418749	7.15767	0		277432	Vstm2l	-6.39231	-3.50164	0.547789	0.088288	0
56726	Sh3bgrl	6.77542	2.54286	0.375307	5.82743	0		16772	Lama1	-6.30874	-2.60182	0.412415	0.16473	0
260409	Cdc42ep3	6.74529	3.35696	0.497675	10.2458	0		21418	Tcfap2a	-6.30728	-2.42827	0.384995	0.185788	0
74134	Cyp2s1	6.74317	2.08634	0.309401	4.2467	0		20525	Slc2a1	-6.30261	-2.91	0.461713	0.133047	0
54635	Pdgfc	6.69914	3.18131	0.474883	9.07128	0		12927	Bcar1	-6.25791	-1.89012	0.302036	0.269785	0
17756	Mtap2	6.68477	2.26318	0.338558	4.80048	0		13664	Eif1a	-6.25705	-1.77638	0.2839	0.291915	0
11931	Atp1b1	6.6799	2.21961	0.332282	4.65768	0		18011	Neurl	-6.25255	-1.91846	0.306829	0.264536	0
319154	Hist2h3b	6.65335	1.88319	0.283044	3.6889	0		22271	Upp1	-6.19674	-3.13751	0.506315	0.113636	0
218294	Cdc14b	6.6068	2.20352	0.333523	4.60602	0		231507	Plac8	-6.18624	-3.20148	0.517517	0.108707	0
14958	H1f0	6.60003	2.83915	0.430172	7.15598	0		26941	Slc9a3r1	-6.18271	-1.52328	0.246377	0.347894	0
17859	Mxi1	6.59481	2.67673	0.405885	6.39406	0		56191	Tro	-6.08483	-1.676	0.275439	0.312949	0
381629	0610007C21Rik	6.57642	1.68226	0.255802	3.20931	0		56177	Olfm1	-6.03719	-1.71996	0.284894	0.303557	0
18111	Nnat	6.5202	3.87985	0.595051	14.7215	0		227620	Uap1l1	-6.02618	-2.12506	0.352639	0.229241	0
68659	1110032E23Rik	6.51228	2.5047	0.384611	5.6753	0		18845	Plxna2	-6.00536	-2.32263	0.38676	0.199902	0
71897	2310010M24Rik	6.4974	3.34574	0.514936	10.1665	0		15404	Hoxa7	-5.94105	-4.93794	0.831157	0.032624	0
104776	Aldh6a1	6.49625	2.40382	0.370033	5.29204	0		67666	Hapln3	-5.893	-1.94219	0.329576	0.260221	0
329575	LOC329575	6.49625	1.83798	0.28293	3.57509	0		241520	D430039N05Rik	-5.88616	-2.59662	0.441141	0.165325	0
244579	Tox3	6.49613	2.57298	0.396079	5.95036	0		229600	BC028528	-5.87573	-1.97113	0.335469	0.255054	0
16661	Krt10	6.48462	2.26478	0.349255	4.80583	0		13132	Dab2	-5.84685	-3.00148	0.513349	0.124872	0
66046	Ndufb5	6.46796	2.38861	0.369299	5.23653	0		72584	Cul4b	-5.82954	-1.71485	0.294165	0.304635	0
218734	3830406C13Rik	6.46663	1.82774	0.282642	3.54981	0		16668	Krt18	-5.82618	-2.25838	0.387625	0.209007	0
230761	BC039093	6.45885	2.32039	0.359257	4.99467	0		20287	Sct	-5.79644	-3.58346	0.618217	0.08342	0
18645	Pfn2	6.42171	2.36911	0.368922	5.16622	0		16956	Lpl	-5.78762	-1.59322	0.27528	0.331431	0
20541	Slc8a1	6.42161	2.02977	0.316085	4.08341	0		328734		-5.77561	-3.53909	0.612765	0.086025	0
68631	Cryl1	6.39127	2.33303	0.365034	5.03863	0		12035	Bcat1	-5.74967	-2.70036	0.469654	0.153855	0
319157	Hist1h4f	6.38837	2.74144	0.42913	6.68739	0		66667	Hspbap1	-5.74907	-2.38426	0.414721	0.191543	0
74007	Btbd11	6.37602	2.12063	0.332594	4.34882	0		71827	Lrrc34	-5.71343	-1.79004	0.313305	0.289163	0
23882	Gadd45g	6.37558	1.98933	0.312023	3.97052	0		211949	Spsb4	-5.7113	-2.38745	0.418023	0.19112	0
237082	Nxt2	6.36872	2.04739	0.321476	4.13357	0		72780	Rspo3	-5.69615	-2.64181	0.46379	0.160227	0
223649	Nrbp2	6.35648	2.06335	0.324606	4.17956	0		56045	Samhd1	-5.67618	-1.91903	0.338085	0.264432	0
76820	D12Ertd553e	6.33485	2.46609	0.389289	5.52543	0		18263	Odc1	-5.6245	-1.3642	0.242547	0.388449	0
50708	Hist1h1c	6.31073	2.85574	0.452522	7.23877	0		71436	Flrt3	-5.62342	-1.92094	0.341597	0.264082	0
18606	Enpp2	6.28985	2.22778	0.354186	4.68411	0		319876	Cobll1	-5.62016	-2.0711	0.368512	0.237978	0
21858	Timp2	6.28884	1.55297	0.24694	2.9342	0		207474	Kctd12b	-5.55796	-2.26358	0.407269	0.208254	0
230991	B930041F14Rik	6.28039	2.36672	0.376843	5.15768	0		218454	Lhfpl2	-5.54776	-2.2246	0.40099	0.213959	0
230779	Serinc2	6.25248	1.97518	0.315903	3.93176	0		64337	Gng13	-5.5021	-2.00467	0.364346	0.249192	0
16780	Lamb3	6.23229	3.31889	0.532532	9.97898	0		18132	Notch4	-5.49248	-1.63732	0.298102	0.321453	0
319189	Hist2h2bb	6.22556	2.46026	0.395186	5.50314	0		68617	1110012J17Rik	-5.47333	-2.08711	0.381324	0.235352	0
78925	Srd5a1	6.16225	3.14743	0.510761	8.86078	0		73230	Bmper	-5.46265	-2.39885	0.439136	0.189616	0
29864	Rnf11	6.15586	1.89455	0.307764	3.71806	0		78088	Ankrd56	-5.43391	-2.30387	0.42398	0.20252	0
319151	Hist1h3e	6.13938	2.04499	0.333094	4.12671	0		56807	Scamp5	-5.4324	-1.79482	0.330392	0.288208	0
17150	Mfap2	6.12375	2.04743	0.334343	4.13369	0		19294	Pvrl2	-5.40061	-1.86424	0.34519	0.274668	0
238673	Zfp367	6.11618	1.6069	0.262729	3.04597	0		207596	Thsd4	-5.39376	-2.64866	0.491061	0.159468	0
215201	4732479N06Rik	6.11268	1.90894	0.312292	3.75533	0		12310	Calca	-5.36777	-1.99785	0.372193	0.250373	0
12014	Bach2	6.10638	2.12116	0.347368	4.35043	0		50876	Tmod2	-5.35703	-1.94603	0.363266	0.25953	0
64898	Lpin2	6.09575	1.71278	0.280979	3.27792	0		109019	Obfc2a	-5.35123	-1.91251	0.357397	0.26563	0
319180	Hist1h2bf	6.06882	2.71813	0.447885	6.58021	0		78455	Helz	-5.34294	-1.66993	0.312548	0.314269	0
66359	2310005N03Rik	6.0493	2.29856	0.379972	4.91968	0		22761	Zfpm1	-5.33322	-1.83958	0.344929	0.279403	0
12444	Ccnd2	6.02463	2.27974	0.378404	4.85591	0		67338	Rffl	-5.32662	-1.89563	0.355878	0.268757	0
52538	Acaa2	6.02208	2.74392	0.455644	6.6989	0		14760	Gpr19	-5.32471	-1.52479	0.286361	0.347531	0
319182	Hist1h2bh	5.98718	2.6823	0.448006	6.41877	0		14086	Fscn1	-5.32379	-1.66375	0.312512	0.315619	0
15399	Hoxa2	5.98674	2.5225	0.421348	5.74578	0		18597	Pdha1	-5.30884	-1.41993	0.267464	0.373732	0
103743	Tmem98	5.98621	1.94125	0.324287	3.84038	0		215114	Hip1	-5.3019	-1.76165	0.332268	0.29491	0
66141	Ifitm3	5.95093	2.38839	0.401348	5.23573	0		18616	Peg3	-5.2988	-2.58228	0.487332	0.166977	0
27528	D0H4S114	5.94598	2.41895	0.406821	5.3478	0		20652	Soat1	-5.29488	-1.62487	0.306875	0.32424	0
107723		5.93567	1.67464	0.282132	3.1924	0		18392	Orc1l	-5.24066	-1.85866	0.354661	0.275733	0
20482	Skil	5.92299	2.10618	0.355595	4.30551	0		208076	Pknox2	-5.19743	-1.59359	0.306611	0.331346	0
68346	Sirt5	5.9146	1.89352	0.320143	3.7154	0		17289	Mertk	-5.19239	-1.63697	0.315263	0.321531	0
16782	Lamc2	5.90303	2.22602	0.377098	4.67841	0		53897	Gal3st1	-5.18517	-1.71931	0.331582	0.303695	0
207181	Rbms3	5.90245	3.30906	0.560625	9.91119	0		11514	Adcy8	-5.15687	-2.26991	0.440173	0.207342	0
66576	Uqcrh	5.88556	2.50241	0.425177	5.66629	0		17355	Aff1	-5.14488	-1.91996	0.373179	0.264262	0
58996	4933428G20Rik	5.86832	2.29263	0.39068	4.8995	0		103468	Nup107	-5.10101	-1.34183	0.263051	0.394521	0
72061	2010111I01Rik	5.86507	2.48724	0.424077	5.60706	0		72898	Asphd2	-5.08719	-1.96471	0.386207	0.256191	0
319149	Hist1h3d	5.86201	2.0441	0.348702	4.12415	0		353156	Egfl7	-5.087	-1.65238	0.324824	0.318115	0
12368	Casp6	5.85136	1.49374	0.255281	2.81619	0		320360	Ric3	-5.06828	-2.15076	0.424357	0.225194	0
12238	Commd3	5.82173	1.81355	0.311513	3.51505	0		216527	Ccm2	-5.04709	-1.73289	0.343344	0.300849	0
14013	Evi1	5.7859	2.10079	0.363088	4.28944	0		19171	Psmb10	-5.03344	-1.57015	0.311944	0.336773	0
66259	Camk2n1	5.77637	2.61854	0.453319	6.14127	0		16402	Itga5	-5.02493	-1.89938	0.377992	0.268058	0
11477	Acvr1	5.76034	1.76292	0.306045	3.39384	0		234857	Spire2	-5.0205	-2.0468	0.407688	0.24202	0
67776	Loh11cr2a	5.76011	1.77653	0.308419	3.42601	0		70747	Tspan2	-5.00214	-2.03735	0.407295	0.243611	0
73608	Marveld3	5.75582	1.96271	0.340996	3.89794	0		12667	Chrd	-4.99373	-1.74015	0.348467	0.299338	0
12824	Col2a1	5.74952	2.78035	0.483579	6.87018	0		14853	Gspt2	-4.93195	-1.2547	0.254402	0.419081	0
15114	Hap1	5.74314	2.17172	0.378142	4.50561	0		56421	Pfkp	-4.91469	-1.4503	0.295096	0.365944	0
69386	Hist1h4h	5.73972	1.68662	0.293851	3.21902	0		64406	Sp5	-4.90973	-3.52205	0.717362	0.087048	0
12890	Cplx2	5.73274	1.7299	0.301757	3.31704	0		52609	Cbx7	-4.90916	-1.64237	0.334552	0.32033	0
69590	2310016C16Rik	5.70867	2.50668	0.439101	5.68312	0		84682	Cox4i2	-4.90533	-2.14471	0.43722	0.226141	0
68777	Tmem53	5.67576	2.38895	0.420904	5.23774	0		18242	Oat	-4.89976	-1.67829	0.342525	0.312453	0
14863	Gstm2	5.67101	1.99797	0.352314	3.99438	0		231327	Ppat	-4.88646	-1.55169	0.317548	0.341111	0
239102	Zfhx2	5.67018	1.45362	0.256362	2.73894	0		14155	Fem1b	-4.86206	-1.5662	0.322127	0.337697	0
20524	Slc25a17	5.63996	1.55722	0.276105	2.94286	0		12590	Cdx1	-4.83694	-3.74476	0.774202	0.074596	0
380711	Garnl4	5.63807	2.53802	0.450157	5.80791	0		14702	Gng2	-4.83513	-2.59714	0.53714	0.165266	0
15205	Hes1	5.60821	1.8562	0.330979	3.62052	0		18822	Plod1	-4.82238	-1.24062	0.257263	0.423191	0
11735	Ank3	5.59871	1.80512	0.322417	3.49458	0		27966	Rrp9	-4.8219	-1.50842	0.312826	0.351497	0
12831	Col5a1	5.59701	2.12801	0.380205	4.37115	0		71755	Dhdh	-4.80596	-2.06692	0.430075	0.238668	0
19038	Ppic	5.55948	1.82512	0.32829	3.54337	0		106628	Trip10	-4.79005	-1.96677	0.410595	0.255825	0
225791	Zadh2	5.51031	1.95426	0.354656	3.87518	0		11492	Adam19	-4.78956	-2.57372	0.53736	0.167971	0
14600	Ghr	5.49694	1.54073	0.280288	2.90942	0		27409	Abcg5	-4.78766	-2.25349	0.470686	0.209717	0
13642	Efnb2	5.48344	2.23097	0.406856	4.6945	0		19703	Renbp	-4.77178	-1.40259	0.293934	0.37825	0
102857	Slc6a8	5.47882	1.54121	0.281304	2.91039	0		333564	Gm784	-4.77003	-2.27683	0.47732	0.206351	0
67788	6330577E15Rik	5.47843	2.29662	0.419211	4.91305	0		14462	Gata3	-4.76968	-2.72324	0.570948	0.151434	0
81840	Sorcs2	5.47814	1.58564	0.289448	3.0014	0		13559	E2f5	-4.76958	-1.55844	0.326745	0.339519	0
11865	Arntl	5.4748	1.55062	0.283228	2.92943	0		69101	1810015A11Rik	-4.75838	-1.33398	0.280342	0.396674	0
67102	D16Ertd472e	5.47061	1.97954	0.361849	3.94366	0		217835	Rin3	-4.74706	-1.66796	0.351368	0.314697	0
76958	2210418O10Rik	5.46955	2.15395	0.393807	4.45043	0		20315	Cxcl12	-4.72696	-3.79585	0.803022	0.072	0
320343	Lypd6	5.45554	2.92667	0.536458	7.60352	0		217995	Heatr1	-4.7255	-1.4895	0.315204	0.356137	0
22031	Traf3	5.45483	1.85072	0.339281	3.6068	0		53357	Pla2g6	-4.71562	-1.34742	0.285735	0.392995	0
19862		5.44454	2.65987	0.488538	6.31974	0		276919	Gemin4	-4.70378	-1.20908	0.257045	0.432544	0
76917	Flywch2	5.4348	1.68425	0.3099	3.21373	0		103551	E130012A19Rik	-4.69812	-1.62907	0.346749	0.323296	0
16599	Klf3	5.4312	2.15376	0.396554	4.44987	0		56370	Tagln3	-4.69445	-1.34673	0.286877	0.393183	0
76293	Mfap4	5.42565	2.30131	0.424153	4.92904	0		330050	AI847670	-4.69443	-1.34438	0.286378	0.393824	0
16998	Ltbp3	5.41476	2.22199	0.410358	4.66537	0		20597	Smpd1	-4.69303	-1.31937	0.281134	0.40071	0
319187	Hist1h2bn	5.40915	2.24728	0.41546	4.74788	0		319581	Xkr5	-4.67396	-1.2476	0.266926	0.421149	0
69487	2310003L22Rik	5.40312	1.37325	0.254158	2.59053	0		212547	BC027231	-4.66306	-1.35264	0.290075	0.391575	0
69099	1810009N02Rik	5.39679	2.12109	0.393028	4.35022	0		108105	B3gnt5	-4.66276	-1.72961	0.37094	0.301534	0
50773	Nt5c	5.39645	1.76438	0.326951	3.39727	0		58188	Vstm2b	-4.66111	-2.93674	0.630052	0.130603	0
15401	Hoxa4	5.39243	2.9706	0.550883	7.83862	0		60344	Fign	-4.65823	-1.97342	0.423641	0.254649	0
319655	Podxl2	5.37866	2.30227	0.428037	4.93232	0		13008	Csrp2	-4.65545	-1.97332	0.423874	0.254666	0
53412	Ppp1r3c	5.37265	2.27498	0.423437	4.8399	0		16362	Irf1	-4.65215	-1.65096	0.354882	0.318427	0
13476	Reep5	5.34767	2.52109	0.471436	5.74014	0		228876	Zfp334	-4.64427	-1.1525	0.248156	0.449844	0
67041	Oxct1	5.3434	2.77572	0.519467	6.84817	0		66861	Dnajc10	-4.62566	-1.29312	0.279553	0.408068	0
21859	Timp3	5.33947	2.6274	0.492071	6.17911	0		16826	Ldb2	-4.62238	-1.97501	0.427272	0.254367	0
228357	Lrp4	5.32741	1.80907	0.339577	3.50416	0		56524	Mpp6	-4.61823	-1.32108	0.286057	0.400237	0
319475	Zfp672	5.32715	1.75169	0.328824	3.36754	0		14885	Gtf2h4	-4.61167	-1.23949	0.268772	0.423523	0
226422	Rab7l1	5.302	1.78251	0.336195	3.44024	0		73102	3110004L20Rik	-4.60671	-1.42941	0.310289	0.371282	0
14873	Gsto1	5.2997	1.58784	0.299608	3.00598	0		22134	Tgoln1	-4.60426	-1.61716	0.351231	0.325977	0
74107	Cep55	5.25782	1.90879	0.363039	3.75495	0		106522	AW548124	-4.59787	-2.8531	0.620525	0.138399	0
22652	Mkrn3	5.24895	1.4678	0.279637	2.766	0		50492	Thop1	-4.59674	-1.36964	0.29796	0.386988	0
16008	Igfbp2	5.23996	3.43067	0.654714	10.7829	0		244329	Mcph1	-4.59564	-1.10974	0.241477	0.463376	0
74747	Ddit4	5.22781	1.85808	0.355423	3.62525	0		14219	Ctgf	-4.58796	-1.73711	0.378624	0.299969	0
74015	Fcho1	5.22038	1.81725	0.348107	3.52409	0		15194	Hd	-4.56084	-1.35345	0.296755	0.391355	0
66447	Mgst3	5.20599	1.71631	0.329679	3.28594	0		19141	Lgmn	-4.55685	-1.60531	0.352284	0.328666	0
98985	Clp1	5.20497	1.67465	0.32174	3.19242	0		14432	Gap43	-4.5419	-2.3324	0.513531	0.198553	0
19340	Rab3d	5.19702	2.85629	0.5496	7.24148	0		72462	Rrp1b	-4.53965	-1.26174	0.277938	0.417041	0
60599	Trp53inp1	5.18896	2.09272	0.403301	4.2655	0		17390	Mmp2	-4.52236	-2.70245	0.597575	0.153632	0
18569	Pdcd4	5.18788	2.12594	0.409789	4.36486	0		225870	Rin1	-4.50887	-1.5357	0.340594	0.344913	0
26897	Acot1	5.18301	2.34105	0.451678	5.06671	0		110816	Pwp2	-4.48768	-1.4395	0.320767	0.368695	0
28080	Atp5o	5.17911	2.19538	0.423891	4.5801	0		269536	Tex10	-4.48754	-1.39398	0.310634	0.380513	0
66379	2310016M24Rik	5.17003	1.56859	0.303401	2.96615	0		68337	Crip2	-4.48567	-1.41422	0.315274	0.375214	0
245867	Pcmtd2	5.15092	2.02388	0.392917	4.06677	0		26406	Map3k3	-4.4817	-1.60368	0.357827	0.329037	0
12015	Bad	5.13539	1.70344	0.331706	3.25676	0		15569	Elavl2	-4.47914	-1.4388	0.321223	0.368873	0
68152	5830415L20Rik	5.12616	1.62494	0.31699	3.08429	0		11859	Phox2a	-4.47243	-1.89163	0.422953	0.269503	0
19188	Psme2	5.12123	2.54416	0.496788	5.8327	0		20446	St6galnac2	-4.4643	-1.80692	0.404748	0.285801	0
18484	Pam	5.11873	1.7099	0.334048	3.27138	0		76477	Pcolce2	-4.45043	-1.66399	0.373896	0.315564	0
77411	Rbm35b	5.11077	1.98073	0.38756	3.94692	0		225617	9430028L06Rik	-4.45039	-1.85178	0.416093	0.277051	0
23994	Dazap2	5.10766	2.26223	0.442909	4.79733	0		209195	Clic6	-4.43208	-2.03102	0.458255	0.244682	0
13170	Dbp	5.10087	1.54869	0.303612	2.9255	0		18762	Prkcz	-4.42925	-1.41719	0.319961	0.374441	0
14070	F8a	5.09942	1.55491	0.304918	2.93815	0		114255	Dok4	-4.42349	-1.62231	0.366749	0.324815	0
102626	Mapkapk3	5.09837	2.07268	0.406538	4.20667	0		20135	Rrm2	-4.4162	-1.58359	0.358588	0.33365	0
54711	Plagl2	5.09674	1.55795	0.305676	2.94436	0		223723	Ttll12	-4.40987	-1.23374	0.279767	0.425215	0
243382	Ppm1k	5.08628	1.82467	0.358744	3.54226	0		217341	Qrich2	-4.40879	-1.65286	0.374902	0.318008	0
20682	Sox9	5.08345	2.15569	0.42406	4.45581	0		72333	Palld	-4.39558	-1.47582	0.33575	0.35953	0
12583	Cdo1	5.08336	3.23779	0.636939	9.43348	0		11674	Aldoa	-4.39019	-1.55722	0.354704	0.339806	0
22344	Vezf1	5.07523	1.80276	0.355207	3.48886	0		64453	Zfp280b	-4.38981	-1.37304	0.312778	0.386077	0
108143	Taf9	5.06668	2.02936	0.40053	4.08223	0		17216	Mcm2	-4.38835	-1.10651	0.252147	0.464416	0
227960	Gca	5.05748	2.99242	0.591681	7.95805	0		216739	Acsl6	-4.38754	-1.46562	0.334043	0.362079	0
13711	Elf5	5.05681	2.99829	0.592922	7.99054	0		11520	Adfp	-4.36614	-1.40667	0.322178	0.37718	0
22590	Xpa	5.05357	2.1487	0.425184	4.43428	0		230967	BC046331	-4.35518	-1.45512	0.334113	0.364724	0
72388	Ripk4	5.05032	1.47963	0.292976	2.78877	0		66902	Mtap	-4.35485	-1.55472	0.357009	0.340395	0
360198	Hist1h3a	5.03423	2.12636	0.422381	4.36614	0		75751	Ipo4	-4.35301	-1.45344	0.333893	0.365149	0
194309	Vps37d	5.01075	1.54192	0.307723	2.91183	0		20509	Slc19a1	-4.34525	-1.07022	0.246297	0.476246	0
18676	Phf2	4.99823	1.8709	0.374312	3.6576	0		20334	Sec23a	-4.34507	-1.76906	0.407141	0.293401	0
68126	Fahd2a	4.99813	1.23124	0.246341	2.34769	0		13557	E2f3	-4.33429	-1.15743	0.267039	0.448311	0
108075	Ltbp4	4.98943	3.58709	0.718938	12.0177	0		11816	Apoe	-4.31693	-2.71176	0.628168	0.152644	0
67528	Nudt7	4.9804	1.6405	0.329391	3.11773	0		116848	Baz2a	-4.31476	-1.68962	0.391591	0.310008	0
16592	Fabp5	4.97382	2.02488	0.407107	4.06957	0		257635	Sdsl	-4.3069	-1.57121	0.364811	0.336527	0
28193	Reep3	4.96738	1.61655	0.325433	3.06641	0		213236	Dnd1	-4.29233	-2.4299	0.566103	0.185578	0
56441	Nat6	4.95982	1.42464	0.287237	2.68448	0		16005	Igfals	-4.29194	-1.31403	0.306161	0.402197	0
107586	Ovol2	4.95019	2.07039	0.418245	4.20001	0		13685	Eif4ebp1	-4.29079	-1.63364	0.380733	0.322273	0
14388	Gab1	4.92909	1.68658	0.342169	3.21892	0		211651	Fancd2	-4.28443	-1.45875	0.340477	0.363808	0
16449	Jag1	4.92783	1.63733	0.332263	3.1109	0		13131	Dab1	-4.28359	-1.47066	0.343324	0.360817	0
333182	Cox6b2	4.92456	1.95475	0.396939	3.87648	0		66797	Cntnap2	-4.27444	-1.64055	0.383805	0.320734	0
66234	Sc4mol	4.91751	1.838	0.373766	3.57514	0		55938	Apom	-4.27318	-2.6577	0.621949	0.158471	0
14955	H19	4.91513	2.08019	0.423222	4.22864	0		16373	Irx3	-4.26143	-1.70654	0.400462	0.306394	0
74430	4930452B06Rik	4.91093	1.91088	0.389107	3.76038	0		246154	Vasn	-4.25311	-1.602	0.376666	0.32942	0
67530	Uqcrb	4.90804	2.19935	0.448111	4.59272	0		22793	Zyx	-4.25304	-1.41175	0.33194	0.375855	0
226823	Kctd3	4.90796	1.48277	0.302115	2.79485	0		11481	Acvr2b	-4.23885	-1.14898	0.271059	0.450945	0
22218	Sumo1	4.90586	2.28873	0.46653	4.88626	0		27388	Ptdss2	-4.22867	-1.27268	0.300965	0.41389	0
16155	Il10rb	4.9048	1.9683	0.401301	3.91307	0		98488	Gtf3c3	-4.19986	-1.14401	0.272393	0.452499	0
13730	Emp1	4.89447	3.81179	0.778797	14.0431	0		80909	Gats	-4.17696	-1.40181	0.335605	0.378454	0
57279	Slc25a20	4.8899	1.54185	0.315314	2.91169	0		15117	Has2	-4.16558	-2.31066	0.554704	0.201568	0
71904	Paqr7	4.88799	2.20206	0.450505	4.60137	0		83675	Bicc1	-4.15805	-1.50352	0.361592	0.352692	0
23986	Peci	4.8875	2.05877	0.421231	4.1663	0		223870	Senp1	-4.15115	-1.419	0.341832	0.373972	0
22351	Vill	4.87617	1.67053	0.342591	3.18332	0		272636	D9Ertd280e	-4.13907	-1.99867	0.482879	0.25023	0
108655	Foxp1	4.87023	1.731	0.355425	3.31958	0		108672	Zdhhc15	-4.13047	-1.45044	0.351157	0.365909	0
50490	Nox4	4.8532	2.08504	0.429622	4.24287	0		72416	Lrpprc	-4.12854	-1.54674	0.374645	0.342283	0
72135	Pygo1	4.84713	1.56785	0.32346	2.96463	0		208638	Slc25a38	-4.12344	-1.16332	0.282124	0.446483	0
27276	Plekhb1	4.84127	2.32577	0.480405	5.01333	0		67549	Gpr89	-4.12211	-1.05357	0.25559	0.481775	0
77781	Epm2aip1	4.83825	1.5431	0.318937	2.91419	0		13806	Eno1	-4.11686	-1.52657	0.37081	0.347101	0
71375	Foxn3	4.83728	1.18902	0.245804	2.27998	0		74769	Pik3cb	-4.11603	-1.52878	0.371422	0.34657	0
68910	Zfp467	4.83396	1.5417	0.318932	2.91138	0		192292	Nrbp1	-4.11136	-1.30066	0.316358	0.405939	0
319161	Hist1h4m	4.83259	1.59092	0.329207	3.01242	0		21679	Tead4	-4.11112	-1.57015	0.381927	0.336774	0
16911	Lmo4	4.82922	1.46236	0.302816	2.7556	0		21849	Trim28	-4.10812	-1.27505	0.310373	0.413211	0
20163	Rsu1	4.82162	1.85553	0.384836	3.61885	0		14608	Gpr83	-4.1064	-2.22616	0.542121	0.213726	0
53379	Hnrnpa2b1	4.82011	2.51179	0.521107	5.70329	0		380601	Fastkd5	-4.10262	-1.09974	0.268058	0.466601	0
71951	Gpc2	4.81632	1.72259	0.357656	3.30028	0		15200	Hbegf	-4.10224	-1.24723	0.304036	0.421256	0
56486	Gabarap	4.80223	1.54857	0.32247	2.92528	0		270190	Ephb1	-4.10073	-2.73494	0.666939	0.150211	0
20194	S100a10	4.79914	2.25311	0.469482	4.76709	0		18969	Pola2	-4.08966	-1.03196	0.252334	0.489046	0
74030	Rin2	4.79399	1.9574	0.408303	3.88362	0		73813	4930403C10Rik	-4.08853	-1.29383	0.316453	0.407868	0
13006	Smc3	4.79279	1.4128	0.294775	2.66253	0		20174	Ruvbl2	-4.08673	-1.31413	0.321561	0.402167	0
227737	9130404D14Rik	4.78567	1.5158	0.316737	2.85957	0		382038	AK122209	-4.08355	-1.23514	0.302467	0.424801	0
67288	3110031B13Rik	4.77115	1.84121	0.385905	3.58311	0		53421	Sec61a1	-4.08317	-1.25581	0.307557	0.418759	0
18203	Ntan1	4.7697	1.37319	0.287899	2.59043	0		223726	Mpped1	-4.08228	-2.37239	0.581144	0.193125	0
56016	Hebp2	4.75325	1.83836	0.386759	3.57604	0		74761	Mxra8	-4.08199	-1.72127	0.421674	0.303282	0
66414	Ndufa12	4.74085	1.91607	0.404163	3.77395	0		20810	Srm	-4.07439	-1.36927	0.336067	0.387088	0
194126	Mtmr11	4.71853	1.43584	0.304298	2.7054	0		58194	Sh3kbp1	-4.07291	-1.45668	0.35765	0.364331	0
19009	Pou6f1	4.71806	2.00486	0.424933	4.01349	0		117589	Asb7	-4.07136	-1.16005	0.284931	0.447496	0
70178	2210412D01Rik	4.71304	1.71071	0.362974	3.27322	0		232086	Tmem150	-4.06778	-1.38138	0.339592	0.38385	0
19262	Ptpra	4.71078	1.67841	0.356291	3.20074	0		76238	Grhpr	-4.06426	-1.19628	0.294342	0.436398	0
170753	Zfp704	4.71014	1.34089	0.284681	2.53307	0		21414	Tcf7	-4.0629	-1.46903	0.361572	0.361224	0
269695	Tmem118	4.7099	1.37544	0.292032	2.59447	0		19192	Psme3	-4.06246	-1.00375	0.247079	0.498702	0
66039	D14Ertd449e	4.70583	1.17406	0.249491	2.25646	0		217734	Pomt2	-4.05626	-1.1155	0.275006	0.461532	0
21402	Skp1a	4.69793	1.45948	0.310663	2.75009	0		83679	Pde4dip	-4.04324	-1.59252	0.393873	0.331591	0
213573	Efcab4a	4.69373	2.08246	0.443669	4.2353	0		20111	Rps6ka1	-4.0264	-1.35715	0.337063	0.390353	0
93737	Pard6g	4.68305	1.79671	0.383663	3.47428	0		213773	Tbl3	-4.02498	-1.1991	0.297915	0.435546	0
94353	Hmgn3	4.67286	2.24475	0.480381	4.73955	0		216869	Arrb2	-4.01949	-1.57172	0.391025	0.336407	0
109754	Cyb5r3	4.67245	1.2592	0.269495	2.39363	0		277360	BC067047	-4.01799	-1.5374	0.38263	0.344505	0
17524	Mpp1	4.6692	1.40827	0.301608	2.65419	0		320024	Aadacl1	-4.01338	-1.17004	0.291536	0.444408	0
69538	Antxr1	4.6608	2.62719	0.563678	6.17822	0		12904	Crabp2	-4.01271	-1.64298	0.409444	0.320195	0
67991	Btbd14a	4.6571	1.37691	0.295659	2.59712	0		57258	Xpo4	-4.00982	-1.27283	0.317428	0.413848	0
67701	Wfdc2	4.64998	1.47674	0.317581	2.7832	0		22687	Zfp259	-4.00295	-1.17243	0.292891	0.443674	0
66177	Ubl5	4.64383	2.15724	0.46454	4.46062	0		26384	Gnpda1	-3.99915	-0.9945	0.248679	0.501908	0
56460	Pkp3	4.64154	1.91197	0.411927	3.76324	0		20471	Six1	-3.99531	-3.21103	0.803699	0.10799	0
242864	AB112350	4.63551	1.27434	0.274909	2.41889	0		110095	Pygl	-3.98934	-1.7306	0.433806	0.301327	0
236899	Pcyt1b	4.63472	1.59332	0.343779	3.01743	0		57434	Xrcc2	-3.98838	-1.15233	0.288921	0.449898	0
223753	Cerk	4.63338	1.28031	0.276323	2.42891	0		74648	S100pbp	-3.98175	-0.93612	0.235103	0.522636	0
93843	Pnck	4.62903	1.67769	0.362427	3.19915	0		13144	Dapk3	-3.97524	-1.19192	0.299836	0.437719	0
15926	Idh1	4.62604	1.59998	0.345864	3.03139	0		66262	Ing5	-3.97457	-1.1361	0.285843	0.454987	0
67759	5033414D02Rik	4.61974	1.54058	0.333478	2.90912	0		24045	Scamp3	-3.97432	-1.15078	0.289553	0.450383	0
67117	Dynlt3	4.61453	1.95475	0.423608	3.8765	0		20646	Snrpn	-3.96471	-1.77521	0.447752	0.292152	0
18590	Pdgfa	4.60748	1.40417	0.304759	2.64665	0		110109	Nol1	-3.96083	-1.35164	0.341251	0.391847	0
231532	Arhgap24	4.60011	1.90669	0.414487	3.74947	0		68626	Elac2	-3.95944	-1.07474	0.271438	0.474755	0
14168	Fgf13	4.59915	1.60598	0.349191	3.04403	0		110911	Cds2	-3.95374	-1.22952	0.310977	0.426459	0
20747	Spop	4.59625	1.32216	0.287661	2.5004	0		217732	2310044G17Rik	-3.9501	-0.95085	0.240715	0.517329	0
58226	Cacna1h	4.58765	2.20403	0.480426	4.60763	0		226849	Ppp2r5a	-3.94904	-1.49431	0.378399	0.35495	0
22704	Zfp46	4.58146	1.16243	0.253725	2.23834	0		236900	Pdk3	-3.94745	-1.12032	0.283808	0.459993	0
107503	Atf5	4.57723	1.40034	0.305935	2.63963	0		76073	Pcgf5	-3.94555	-1.32446	0.335684	0.399299	0
19725	Rfx2	4.5746	1.5157	0.33133	2.85938	0		79456	Recql4	-3.93704	-1.12779	0.286455	0.457618	0
71345	Tmem16j	4.5705	1.16861	0.255686	2.24795	0		17768	Mthfd2	-3.93497	-1.40441	0.356904	0.377773	0
18708	Pik3r1	4.5576	2.07535	0.455361	4.21448	0		106014	AW049604	-3.92021	-1.60762	0.410086	0.328139	0
12387	Ctnnb1	4.55734	1.46824	0.322171	2.76685	0		192656	Ripk2	-3.9166	-1.97382	0.503964	0.254578	0
16949	Loxl1	4.55711	1.52943	0.335614	2.88672	0		14450	Gart	-3.90234	-1.34651	0.345051	0.393243	0
14697	Gnb5	4.55509	1.66987	0.366593	3.18185	0		12021	Bard1	-3.89755	-1.44937	0.371867	0.366182	0
22209	Ube2a	4.5485	1.40929	0.309837	2.65607	0		319582	6430573F11Rik	-3.88736	-1.70061	0.437472	0.307656	0
14456	Gas6	4.54745	2.37343	0.521925	5.1817	0		56407	Trpc4ap	-3.88641	-1.23293	0.317241	0.425453	0
56405	Dusp14	4.54473	2.03225	0.447166	4.09042	0		20668	Sox13	-3.88514	-1.35503	0.348771	0.390928	0
319186	Hist1h2bm	4.53837	1.58904	0.350133	3.00848	0		209354	Eif2b1	-3.88408	-1.57144	0.404586	0.336472	0
56009	Refbp2	4.53785	1.77641	0.391466	3.42573	0		18080	Nin	-3.88375	-1.43488	0.369458	0.369877	0
11551	Adra2a	4.53746	2.77946	0.612557	6.86593	0		77976	Nuak1	-3.88074	-1.30138	0.335342	0.405739	0
50784	Ppap2c	4.52393	1.39678	0.308753	2.63313	0		18453	P4hb	-3.88048	-1.14152	0.294171	0.45328	0
74570	Zkscan1	4.52314	1.81916	0.40219	3.52876	0		331623	AK122525	-3.87965	-1.47482	0.380141	0.359779	0
30954	Siva1	4.52291	1.42628	0.315345	2.68752	0		14465	Gata6	-3.87678	-1.55954	0.402278	0.339259	0
19647	Rbbp6	4.5145	1.47723	0.327218	2.78413	0		22418	Wnt5a	-3.8734	-2.87705	0.74277	0.13612	0
14694	Gnb2l1	4.51198	1.46953	0.325694	2.76931	0		210376	Mtmr9	-3.8647	-1.60593	0.415538	0.328524	0
399558	Flrt2	4.50619	2.0505	0.45504	4.14249	0		23948	Mmp17	-3.86448	-1.3576	0.351301	0.390232	0
72739	Zkscan3	4.49573	2.10884	0.469077	4.31345	0		229543	Ints3	-3.86307	-1.29823	0.336061	0.406625	0
242083	Ppm1l	4.48783	1.54471	0.3442	2.91745	0		12293	Cacna2d1	-3.86251	-1.6334	0.422885	0.322328	0
71793	Ints12	4.4834	1.20549	0.268878	2.30615	0		11966	Atp6v1b2	-3.85493	-1.20935	0.313714	0.432464	0
230775	Bai2	4.48223	1.58846	0.354391	3.00729	0		56542	Ick	-3.85295	-1.16455	0.302248	0.446104	0
17993	Ndufs4	4.47615	1.8411	0.411313	3.58282	0		192216	Tmem47	-3.8519	-1.69838	0.440921	0.308132	0
233328	Lrrk1	4.45349	1.77505	0.398576	3.42251	0		218581	Depdc1b	-3.83487	-1.15994	0.302472	0.447531	0
65970	Lima1	4.45041	1.84265	0.414042	3.58669	0		93840	Vangl2	-3.83399	-1.11455	0.290701	0.461837	0
109163	3010003L21Rik	4.44627	1.26137	0.283692	2.39723	0		19731	Rgl1	-3.82409	-1.46989	0.384377	0.361009	0
68196	Hsbp1	4.44562	1.21014	0.272209	2.31359	0		60597	Mapk8ip2	-3.82361	-2.39218	0.625633	0.190495	0
22627	Ywhae	4.43925	1.75769	0.395942	3.38156	0		68521	1110013L07Rik	-3.82191	-1.00752	0.263618	0.497399	0
27280	Phlda3	4.4373	1.65282	0.372483	3.14447	0		110750	Cse1l	-3.821	-1.19056	0.311583	0.438133	0
66586	Crls1	4.43598	1.04738	0.23611	2.06677	0		216156	Wdr18	-3.81539	-1.25284	0.328366	0.41962	0
53610	Nono	4.43551	1.96162	0.442253	3.89499	0		226539	Dars2	-3.81154	-1.13198	0.296988	0.456288	0
66208	Nenf	4.43172	1.35667	0.306126	2.56093	0		329165	Abi2	-3.80898	-0.94992	0.24939	0.517661	0
17257	Mecp2	4.42667	1.42996	0.323033	2.69439	0		218544	Sgtb	-3.7991	-1.16741	0.307285	0.44522	0
56330	Pdcd5	4.42455	1.67695	0.379011	3.19752	0		20167	Rtn2	-3.78921	-1.60644	0.423952	0.328407	0
56278	Gkap1	4.41943	1.43068	0.323726	2.69575	0		219134	Tmem46	-3.7882	-2.22237	0.586657	0.214289	0
109331	Rnf20	4.40745	1.56559	0.355214	2.95998	0		239157	Pnma2	-3.78334	-2.56158	0.677069	0.16939	0
228608	Smox	4.40288	1.83275	0.416262	3.56216	0		83395	Sp6	-3.778	-2.34517	0.620746	0.196803	0
12484	Cd24a	4.40093	1.70239	0.386825	3.2544	0		70012	Ccdc21	-3.77346	-1.12433	0.297957	0.458715	0
108927	Lhfp	4.40066	2.18487	0.496486	4.54684	0		330171	Kctd10	-3.77333	-1.35788	0.359863	0.390155	0
27260	Plek2	4.39829	2.50207	0.568872	5.66496	0		76813	Armc6	-3.77313	-1.06379	0.281939	0.478373	0
21844	Tiam1	4.39565	1.73056	0.393698	3.31856	0		20402	Zfp106	-3.77002	-1.4822	0.393155	0.357942	0
22346	Vhlh	4.3895	1.61431	0.367766	3.06165	0		13244	Degs1	-3.76397	-1.10236	0.292871	0.465755	0
22693	Zfp30	4.38718	1.8908	0.430984	3.70841	0		218975	C130032J12Rik	-3.76198	-1.12101	0.297984	0.459771	0
66407	Mrps15	4.38538	1.42673	0.325338	2.68837	0		13195	Ddc	-3.75767	-1.24306	0.330805	0.422476	0
68099	6720467C03Rik	4.38272	1.42892	0.326035	2.69245	0		57776	Ttyh1	-3.74056	-1.46699	0.392183	0.361737	0
13047	Cutl1	4.38012	1.73073	0.395134	3.31896	0		66942	Ddx18	-3.72948	-1.06176	0.284695	0.479046	0
107227	Macrod1	4.37551	1.36561	0.312102	2.57685	0		110253	Triobp	-3.72292	-1.07187	0.287912	0.475701	0
66225	1190005P17Rik	4.37158	1.32962	0.304152	2.51337	0		52666	D10Ertd610e	-3.71922	-1.23385	0.331748	0.425183	0
98733	Obsl1	4.37133	1.81571	0.415368	3.52033	0		26429	Orc5l	-3.71904	-0.95574	0.256985	0.515577	0
319184	Hist1h2bk	4.37058	1.61508	0.369534	3.06329	0		18141	Nup50	-3.71314	-1.2092	0.325655	0.432507	0
13030	Ctsb	4.36233	1.48617	0.340684	2.80145	0		52874	D19Bwg1357e	-3.71311	-1.15089	0.309954	0.450347	0
320078	Olfml2b	4.35776	1.62454	0.372793	3.08345	0		269252	Gtf3c4	-3.70369	-0.91808	0.247884	0.529212	0
68197	Ndufc2	4.35731	2.03582	0.467221	4.10057	0		99543	Olfml3	-3.70369	-1.91715	0.517634	0.264777	0
14700	Gng10	4.35221	1.70605	0.391997	3.26267	0		67534	Ttll4	-3.70071	-1.34742	0.364099	0.392993	0
11946	Atp5a1	4.33113	2.0129	0.464753	4.03594	0		71924	Tube1	-3.69848	-0.95872	0.25922	0.514514	0
15081	H3f3b	4.32903	1.18725	0.274252	2.27717	0		69675	Pxdn	-3.69839	-1.2294	0.332416	0.426494	0
217219	BC025575	4.32845	2.42007	0.559109	5.35198	0		12903	Crabp1	-3.69815	-2.86191	0.773876	0.137556	0
243328	Slc29a4	4.32638	1.30764	0.302248	2.47537	0		70385	Ccdc99	-3.69632	-1.16236	0.314463	0.446782	0
16431	Itm2a	4.30514	2.30565	0.535556	4.94389	0		12236	Bub1b	-3.68689	-1.17171	0.317804	0.443896	0
73385	1700047I17Rik1	4.30451	1.92381	0.446929	3.79424	0		231834	Snx8	-3.68373	-0.99558	0.270264	0.501534	0
319160	Hist1h4k	4.29837	1.77697	0.413406	3.42705	0		17300	Foxc1	-3.68342	-1.68496	0.457443	0.311012	0
67887	Tmem66	4.29284	1.78236	0.415194	3.43989	0		64424	Polr1e	-3.68158	-1.25046	0.339654	0.420313	0
319148	Hist1h3c	4.28458	1.48678	0.347008	2.80263	0		67978	Tctn2	-3.67801	-1.12612	0.306177	0.458146	0
69225	0710008K08Rik	4.28179	1.1582	0.270493	2.23178	0		14862	Gstm1	-3.67486	-1.10133	0.299692	0.466087	0
14118	Fbn1	4.27912	2.59023	0.605318	6.02193	0		29858	Pmm1	-3.66375	-1.4141	0.38597	0.375244	0
218503	Fcho2	4.27423	1.63329	0.382125	3.10219	0		93692	Glrx	-3.66181	-1.27222	0.34743	0.414022	0
19645	Rb1	4.27113	1.28135	0.300002	2.43066	0		16828	Ldha	-3.6596	-1.08124	0.295452	0.472624	0
218793	Ube2e2	4.27006	1.17629	0.275474	2.25995	0		109711	Actn1	-3.6588	-1.26805	0.346577	0.41522	0
66212	Sec61b	4.26989	1.73913	0.407301	3.33834	0		215418	Axud1	-3.65518	-2.47036	0.67585	0.180446	0
106583	Rbm16	4.24652	1.50268	0.353862	2.83369	0		171212	Galnt10	-3.64894	-1.1051	0.302855	0.464871	0
52898	D11Bwg0434e	4.23724	1.41028	0.33283	2.65789	0		192159	Prpf8	-3.64893	-1.33596	0.366123	0.396129	0
21812	Tgfbr1	4.23405	1.32368	0.312627	2.50303	0		15983	Ifrd2	-3.64231	-1.17524	0.322664	0.44281	0
319152	Hist1h3h	4.22313	1.85038	0.438154	3.60596	0		72185	Dbndd1	-3.64058	-1.41615	0.388991	0.37471	0
52443	Mrpl48	4.21875	1.50362	0.356414	2.83554	0		319317	A930034L06Rik	-3.63891	-1.95747	0.537928	0.257479	0
12338	Capn6	4.21584	2.09647	0.497285	4.27663	0		13367	Diap1	-3.63675	-1.25108	0.344012	0.420132	0
19650	Rbl1	4.21553	1.36892	0.324733	2.58277	0		224897	Dpp9	-3.63566	-1.01036	0.277903	0.496422	0
16777	Lamb1-1	4.21282	1.42904	0.339212	2.69267	0		68294	0610009O03Rik	-3.63502	-1.19003	0.327378	0.438295	0
319183	Hist1h2bj	4.21144	1.84272	0.437552	3.58686	0		70784	Rasl12	-3.63383	-1.24767	0.343348	0.421128	0
226351	Tmem185b	4.20579	1.18159	0.280943	2.26826	0		73067	3110005G23Rik	-3.62949	-0.95291	0.262546	0.51659	0
56175	Bace2	4.20536	1.63534	0.388871	3.10662	0		13660	Ehd1	-3.62636	-1.49329	0.411788	0.3552	0
65098	Zfand6	4.20391	1.54431	0.36735	2.91664	0		66335	Atp6v1c1	-3.62624	-1.07396	0.296162	0.475015	0
12479	Cd1d1	4.20386	1.639	0.389881	3.11451	0		67052	Ndc80	-3.61846	-1.07758	0.2978	0.473823	0
78334	Cdc2l6	4.19442	1.32836	0.316697	2.51117	0		68385	Tlcd1	-3.61785	-1.46269	0.404298	0.362816	0
20678	Sox5	4.19391	1.79651	0.42836	3.47378	0		110213	Tegt	-3.60807	-1.20077	0.3328	0.435044	0
66240	Kcne1l	4.1927	2.8594	0.681995	7.25712	0		229700	Rbm15	-3.60787	-1.01289	0.280744	0.495553	0
211151	Churc1	4.18795	1.685	0.402346	3.21541	0		22042	Tfrc	-3.60695	-0.97518	0.270361	0.508676	0
13382	Dld	4.18754	1.65241	0.394601	3.14358	0		15478	Hs3st3a1	-3.60623	-1.86028	0.51585	0.275424	0
214579	Aldh5a1	4.1874	1.13667	0.271451	2.19873	0		11771	Ap2a1	-3.59603	-1.09556	0.304659	0.467953	0
18810	Plec1	4.18708	1.24482	0.2973	2.36989	0		67916	Ppap2b	-3.59225	-1.30847	0.364248	0.403749	0
71653	4930506M07Rik	4.18557	1.24608	0.297709	2.37197	0		320685	Dctd	-3.58973	-1.4606	0.406884	0.363341	0
69019	Spcs1	4.17825	1.48417	0.355212	2.79755	0		66687	Tbc1d15	-3.58894	-0.88507	0.24661	0.541462	0
52717	D10Ertd641e	4.17648	1.30415	0.31226	2.46938	0		16795	Large	-3.58348	-1.11392	0.310849	0.462037	0
13177	Dci	4.17355	1.73433	0.415552	3.32725	0		171166	Mcoln3	-3.57938	-1.60255	0.447718	0.329294	0
76561	Snx7	4.16979	2.05019	0.491678	4.14162	0		11920	Atm	-3.56475	-1.10219	0.309192	0.465809	0
20318	Sdf4	4.16734	1.23626	0.296654	2.35587	0		20613	Snai1	-3.56469	-1.44343	0.404925	0.367691	0
18003	Nedd9	4.15274	1.65807	0.39927	3.15593	0		72565	Uaca	-3.55932	-1.24771	0.350549	0.421115	0
29819	Stau2	4.15187	1.71655	0.413439	3.28648	0		171463	Il17rd	-3.55035	-1.21851	0.343208	0.429727	0
16476	Jun	4.13849	1.31324	0.317324	2.485	0		16529	Kcnk5	-3.55027	-1.18638	0.334165	0.439405	0
19286	Pts	4.12983	1.26525	0.306369	2.40369	0		72148	2610019F03Rik	-3.53848	-1.24932	0.353067	0.420646	0
11906	Zfhx3	4.12947	1.74964	0.423697	3.36275	0		74112	Usp16	-3.5306	-0.97296	0.27558	0.509459	0
69091	Vps26b	4.12647	1.54573	0.374589	2.91951	0		108737	Oxsr1	-3.52828	-0.89939	0.254908	0.536115	0
106795	Tcf19	4.12267	1.1323	0.274653	2.19208	0		20019	Rpo1-4	-3.52686	-1.23446	0.350017	0.425002	0
13713	Elk3	4.11602	1.79112	0.435158	3.46084	0		15277	Hk2	-3.52611	-0.98117	0.278257	0.50657	0
11981	Atp9a	4.11217	1.58097	0.384462	2.99171	0		107029	Me2	-3.5244	-2.16957	0.615588	0.222276	0
24109	Ubl3	4.11011	1.30498	0.317506	2.47081	0		269682	Golga3	-3.52256	-0.85836	0.243674	0.55158	0
624866	EG624866	4.10641	1.65665	0.40343	3.15283	0		64051	Sv2a	-3.51841	-1.25146	0.35569	0.420022	0
12476	Cd151	4.10148	1.45036	0.353619	2.73277	0		72293	Nkd2	-3.51096	-0.93181	0.265399	0.524201	0
83814	Nedd4l	4.10058	1.87224	0.456579	3.66101	0		20249	Scd1	-3.50909	-1.21733	0.346908	0.430078	0
232337	Zfp637	4.09938	1.20166	0.293133	2.30005	0		94185	Tnfrsf21	-3.50354	-1.17509	0.335401	0.442856	0
68194	Ndufb4	4.09732	1.95961	0.478266	3.88957	0		225898	Eml3	-3.50332	-1.33108	0.379949	0.39747	0
52055	Rab11fip5	4.08886	1.87255	0.457964	3.66178	0		114606	Tle6	-3.50025	-1.42919	0.40831	0.37134	0
19156	Psap	4.08646	1.49975	0.367005	2.82794	0		208666	Diras1	-3.49892	-1.02539	0.293059	0.491277	0
231225	Tapt1	4.07956	1.31116	0.321398	2.48142	0		16818	Lck	-3.49855	-1.36356	0.389749	0.388623	0
73016	Kremen2	4.079	2.75142	0.674533	6.73378	0		442801	Arhgef15	-3.47838	-1.65502	0.475801	0.317534	0
66734	Map1lc3a	4.07807	1.21218	0.297243	2.31687	0		17535	Mre11a	-3.4754	-0.958	0.275652	0.514769	0
68332	0610010E21Rik	4.06462	1.54297	0.37961	2.91394	0		69581	Rhou	-3.46977	-1.47389	0.42478	0.36001	0
17974	Nck2	4.06411	1.42581	0.350829	2.68665	0		20112	Rps6ka2	-3.46418	-1.19411	0.344701	0.437057	0
76959	Chmp5	4.05933	1.73632	0.427735	3.33184	0		76781	Mettl4	-3.46318	-1.09031	0.31483	0.46966	0
18797	Plcb3	4.05635	1.39793	0.344627	2.63522	0		434778	6330534C20Rik	-3.45971	-1.15895	0.334984	0.447839	0
53330	Vamp4	4.05616	1.3795	0.3401	2.60179	0		19734	Rgs16	-3.45687	-1.37239	0.397005	0.38625	0
15077	Hist2h3c1	4.05568	1.18186	0.291409	2.26869	0		17218	Mcm5	-3.45473	-1.15244	0.333582	0.449865	0
19325	Rab10	4.04894	1.053	0.260069	2.07484	0		18760	Prkcm	-3.44934	-1.27612	0.369959	0.412906	0
14790	Grcc10	4.03446	1.24749	0.309209	2.37428	0		55944	Eif3d	-3.44894	-1.179	0.341845	0.441656	0
67877	Nat5	4.03081	1.44919	0.359529	2.73055	0		76960	Bcas1	-3.44844	-1.66322	0.482312	0.315733	0
14548	Mrps33	4.02746	1.41356	0.350979	2.66393	0		53978	Edg4	-3.44433	-1.14774	0.333225	0.451333	0
99730	Taf13	4.02457	1.42102	0.353086	2.67775	0		12826	Col4a1	-3.44057	-1.24078	0.360632	0.423144	0
93679	Trim8	4.02339	1.23686	0.307417	2.35685	0		105245	Txndc5	-3.43765	-1.20454	0.350397	0.433907	0
15040	H2-T23	4.0179	1.66345	0.414009	3.16772	0		69150	Snx4	-3.43765	-0.91761	0.26693	0.529385	0
71687	Tmem25	4.01003	1.19622	0.298306	2.29138	0		20932	Surf4	-3.43764	-0.80599	0.234461	0.571968	0
73181	Nfatc4	4.00862	1.25244	0.312437	2.38244	0		192654	Lypla3	-3.43453	-0.97165	0.282905	0.509924	0
68202	Ndufa5	4.00799	1.85292	0.462308	3.61232	0		192176	Flna	-3.43355	-1.39748	0.407007	0.379591	0
70835	Prss22	4.00146	1.75287	0.438058	3.37028	0		18971	Pold1	-3.42864	-1.18736	0.346307	0.439104	0
17281	Fyco1	3.99874	1.60065	0.400289	3.0328	0		56332	Amotl2	-3.42757	-1.13783	0.331964	0.454444	0
56295	Higd1a	3.98534	1.39375	0.349719	2.6276	0		14299	Freq	-3.42249	-1.10023	0.32147	0.466443	0
107939	Pom121	3.97882	1.41428	0.355453	2.66527	0		407812	BC066028	-3.42086	-1.46662	0.428729	0.361829	0
223697	Unc84b	3.97583	1.77422	0.446252	3.42054	0		71971	Zswim1	-3.41457	-0.90358	0.264625	0.534558	0
66496	2700038C09Rik	3.97087	1.87029	0.471002	3.65606	0		20624	Eftud2	-3.41284	-0.98856	0.28966	0.50398	0
16011	Igfbp5	3.96297	2.13067	0.537644	4.3792	0		71982	Snx10	-3.41145	-1.10112	0.322772	0.466155	0
71913	Tmem79	3.96196	1.22268	0.308606	2.3338	0		81896	Ift122	-3.41108	-1.31365	0.385113	0.402301	0
67419	3632451O06Rik	3.96192	1.74462	0.440347	3.35107	0		433323	Sgpp2	-3.40869	-2.25252	0.660816	0.209858	0
17179	Matk	3.95965	1.05396	0.266175	2.07622	0		16976	Lrpap1	-3.40276	-1.88465	0.553859	0.27081	0
232748	BC011487	3.95655	1.27272	0.321674	2.41617	0		228880	Prkcbp1	-3.40169	-1.06233	0.312294	0.478858	0
75734	5230400G24Rik	3.95585	1.65022	0.417159	3.13882	0		23874	Farsb	-3.39814	-1.03341	0.304111	0.488554	0
16601	Klf9	3.9513	1.94504	0.492252	3.85047	0		75425	2610036D13Rik	-3.39746	-0.98536	0.290029	0.505098	0
12305	Ddr1	3.95	1.27284	0.322238	2.41637	0		27368	Tbl2	-3.39126	-1.11857	0.32984	0.460549	0
68636	Fahd1	3.94681	1.25404	0.317736	2.38509	0		18950	Pnp	-3.39006	-1.4267	0.420848	0.371981	0
67023	Use1	3.94625	1.0546	0.267242	2.07715	0		14609	Gja1	-3.38993	-1.01556	0.299582	0.494635	0
12366	Casp2	3.9451	1.19527	0.302976	2.28988	0		353172	Gars	-3.38904	-0.9949	0.293564	0.501771	0
12560	Cdh3	3.94335	1.79359	0.454838	3.46676	0		26913	Gprin1	-3.37906	-1.5855	0.469213	0.33321	0
19876	Robo1	3.93962	1.44871	0.367729	2.72964	0		68870	1190002A17Rik	-3.37748	-1.43008	0.423416	0.371111	0
69672	Txndc15	3.93846	1.2427	0.315529	2.36641	0		69719	Cad	-3.37655	-1.62607	0.481576	0.32397	0
68011	Snrpg	3.93793	1.85772	0.47175	3.62434	0		72542	Pgam5	-3.37642	-1.07392	0.318065	0.475026	0
69693	Pof1b	3.93243	2.53061	0.643524	5.77817	0		11438	Chrna4	-3.37397	-2.65711	0.787532	0.158537	0
22025	Nr2c1	3.92598	1.44586	0.36828	2.72425	0		21827	Thbs3	-3.37137	-1.47807	0.438417	0.358969	0
20115	Rps7	3.92503	1.89691	0.483286	3.72415	0		19139	Prps1	-3.37027	-1.29887	0.38539	0.406445	0
18777	Lypla1	3.91626	2.05462	0.524638	4.15434	0		14792	Mboat5	-3.36473	-0.82302	0.244603	0.565257	0
20055		3.90878	1.63764	0.418965	3.11157	0		108943	Rg9mtd2	-3.36415	-1.01623	0.302076	0.494408	0
66990	Tmem134	3.90723	0.973769	0.249222	1.96396	0		11764	Ap1b1	-3.35745	-0.99003	0.294875	0.503468	0
71780	Isyna1	3.9063	1.48164	0.379296	2.79267	0		171580	Mical1	-3.3543	-1.41003	0.420366	0.376303	0
347722	Centg2	3.90214	0.973699	0.24953	1.96387	0		269033	4930503L19Rik	-3.35213	-1.1152	0.332683	0.461627	0
80708	Pacsin3	3.90019	1.26969	0.325544	2.41109	0		105298	Epdr1	-3.34406	-1.0934	0.326966	0.468657	0
22160	Twist1	3.89264	1.68987	0.434118	3.22627	0		11806	Apoa1	-3.34192	-2.28422	0.683506	0.205296	0
19280	Ptprs	3.89058	1.24164	0.31914	2.36467	0		140577	Ankrd6	-3.33988	-1.38962	0.416069	0.381665	0
67474	Snap29	3.89005	1.47029	0.377963	2.77078	0		19128	Pros1	-3.3209	-0.91431	0.275321	0.530596	0
66483	Rpl36al	3.88598	1.68099	0.432578	3.20648	0		50524	Sall2	-3.31814	-1.08685	0.327546	0.47079	0
654426		3.88407	1.69596	0.436646	3.23993	0		107094	Rrp12	-3.31717	-0.99579	0.300192	0.501462	0
30928	Zfp238	3.88246	1.01341	0.261024	2.01868	0		67014	Mina	-3.31592	-1.06071	0.319884	0.479396	0
16451	Jak1	3.88083	1.40215	0.361301	2.64295	0		66611	Ribc1	-3.31539	-1.08891	0.328441	0.470117	0
545013		3.8755	1.94693	0.502368	3.85553	0		56505	Ruvbl1	-3.31153	-1.24772	0.37678	0.421113	0
218100	Zfp322a	3.87127	1.38062	0.356632	2.6038	0		74195	Elp3	-3.31118	-0.81662	0.246626	0.567769	0
258934	Olfr802	3.87031	1.11544	0.288204	2.16661	0		14739	Edg5	-3.3096	-1.14496	0.345951	0.452202	0
19981	Rpl37a	3.86829	1.52875	0.395199	2.88535	0		74111	Rbm19	-3.3088	-0.97475	0.294593	0.508828	0
78894	Aacs	3.86344	1.3208	0.341871	2.49804	0		17217	Mcm4	-3.30789	-0.91185	0.27566	0.531502	0
378462	Morn2	3.86279	1.40158	0.362841	2.64191	0		67976	Trabd	-3.30279	-1.04401	0.316098	0.484979	0
69367	Glrx2	3.85686	1.48397	0.38476	2.79717	0		67078	1700012G19Rik	-3.28954	-1.03073	0.313335	0.489464	0
235493	BC031353	3.85542	1.93425	0.501696	3.8218	0		66980	Zdhhc6	-3.28052	-0.8971	0.273464	0.536963	0
21985	Tpd52	3.85306	1.54088	0.399911	2.90972	0		56041	Uso1	-3.27703	-1.18131	0.360483	0.44095	0
66058	Tmem176a	3.85227	2.1307	0.553103	4.3793	0		13340	Slc29a2	-3.27588	-1.2903	0.393878	0.408867	0
27393	Mrpl39	3.85158	1.2069	0.313352	2.30841	0		68606	Ppm1f	-3.27175	-0.92299	0.282108	0.527416	0
56612	Pfdn5	3.8514	1.19588	0.310504	2.29084	0		65114	Vps35	-3.2714	-1.15474	0.35298	0.449148	0
28027	D4Wsu132e	3.84724	1.0416	0.270739	2.05851	0		69697	2310057J16Rik	-3.2622	-1.04339	0.319842	0.485187	0
56176	Pigp	3.84446	1.32861	0.345591	2.51161	0		225523	Ccdc100	-3.26117	-0.82367	0.252567	0.565004	0
102032	AI316807	3.84311	1.6025	0.416981	3.0367	0		14230	Fkbp10	-3.25978	-1.44054	0.441914	0.368428	0
231801	Hrbl	3.84139	1.02229	0.266126	2.03114	0		20732	Spint1	-3.25859	-1.30051	0.399101	0.405984	0
53328	Pgrmc1	3.83609	1.37174	0.357588	2.58783	0		66349	2310004L02Rik	-3.25713	-0.84932	0.260756	0.555048	0
71779	2011-03-08	3.833	1.24627	0.325143	2.37228	0		22685	Zfp239	-3.25452	-1.26215	0.387814	0.416922	0
12751	Tpp1	3.83033	1.09183	0.285049	2.13144	0		13388	Dll1	-3.24964	-0.97522	0.3001	0.508663	0
67122	Nrarp	3.82989	1.96303	0.512556	3.8988	0		77980	Sbf1	-3.24555	-1.02127	0.314669	0.492681	0
67869	Paip2	3.82701	1.61907	0.423065	3.07178	0		240121	Fsd1	-3.24479	-1.26825	0.390858	0.415162	0
105663	Thtpa	3.82686	1.7705	0.462651	3.41172	0		77951	Cyp20a1	-3.24146	-1.11827	0.344989	0.460647	0
67963	Npc2	3.82259	1.1747	0.307304	2.25745	0		215494	C85492	-3.24097	-0.89104	0.274929	0.539226	0
52829	D4Bwg0951e	3.81821	1.50242	0.393489	2.83318	0		70428	Polr3b	-3.2409	-1.40033	0.432079	0.378844	0
269951	Idh2	3.80754	1.65201	0.433878	3.14271	0		75273	Pelp1	-3.23639	-0.99295	0.306809	0.502448	0
207175	Cetn4	3.80668	1.40164	0.368205	2.64201	0		59095	Fxyd6	-3.23474	-1.26888	0.392266	0.414983	0
19942	Rpl27	3.8038	1.87181	0.492089	3.65991	0		12798	Cnn2	-3.22977	-1.72856	0.535195	0.301754	0
230484	Usp1	3.80108	1.12143	0.295028	2.17562	0		19060	Ppp5c	-3.22722	-1.17852	0.365181	0.441805	0
67880	Dcxr	3.79948	0.965735	0.254175	1.95306	0		76646	Wdr38	-3.22606	-0.88695	0.274934	0.540756	0
20971	Sdc4	3.79937	1.98196	0.521656	3.9503	0		74241	D1Bwg1363e	-3.22452	-1.02713	0.318539	0.490684	0
218772	Rarb	3.79885	0.961007	0.252973	1.94667	0		11641	Akap2	-3.222	-1.47697	0.4584	0.359243	0
17991	Ndufa2	3.79566	1.30779	0.344549	2.47562	0		381591	L1td1	-3.22178	-1.69491	0.526078	0.308875	0
68953	Chmp2a	3.79389	1.32067	0.348105	2.49783	0		28035	Usp39	-3.22132	-1.00717	0.312657	0.497523	0
51810	Hnrnpu	3.79349	1.34672	0.355009	2.54333	0		269378	Ahcy	-3.21707	-1.50432	0.467606	0.352496	0
12696	Cirbp	3.78949	1.92023	0.506724	3.78482	0		15211	Hexa	-3.21702	-0.90236	0.280495	0.535012	0
52837	Txndc13	3.78151	1.36079	0.359855	2.56826	0		71974	Prmt3	-3.2141	-0.88649	0.275814	0.540927	0
28019	Ing4	3.78065	1.17076	0.309673	2.25131	0		12462	Cct3	-3.21402	-1.50579	0.468506	0.352137	0
66680	3230401D17Rik	3.77885	1.61279	0.426794	3.05843	0		212377	F730047E07Rik	-3.21234	-1.04599	0.325617	0.484312	0
102334	Ankrd10	3.77157	1.51128	0.400702	2.85062	0		66959	Dusp26	-3.20883	-0.8931	0.278327	0.538454	0
108755	Lyrm2	3.7705	1.2243	0.324704	2.33642	0		74044	Ttf2	-3.20432	-0.78371	0.24458	0.58087	0
66834	Them2	3.76939	1.35881	0.360486	2.56474	0		51812	Mcrs1	-3.19329	-0.84821	0.265622	0.555474	0
19679	Pitpnm2	3.75907	1.69918	0.45202	3.24716	0		13872	Ercc3	-3.19301	-0.75622	0.236837	0.592045	0
68977	Haghl	3.75316	1.30901	0.348775	2.47771	0		18975	Polg	-3.19228	-1.25576	0.393373	0.418773	0
57438	2011-03-07	3.74646	1.00486	0.268217	2.00675	0		192185	Nadk	-3.19033	-0.79214	0.248295	0.577486	0
75735	Pank1	3.74462	1.24705	0.333023	2.37355	0		17380	Mme	-3.18954	-1.97847	0.6203	0.253758	0
12359	Cat	3.74212	0.876838	0.234316	1.83635	0		66333	Aqp11	-3.18905	-1.80657	0.566491	0.285871	0
68936	1190017O12Rik	3.73839	1.44628	0.386872	2.72504	0		209773	Dennd2a	-3.18606	-0.89832	0.281954	0.53651	0
12064	Bdnf	3.73792	1.81852	0.486505	3.52719	0		19883	Rora	-3.18525	-1.24381	0.390491	0.422256	0
71890	Mad2l2	3.73779	1.36878	0.366201	2.58253	0		59028	Rcl1	-3.18339	-1.06386	0.33419	0.47835	0
69534	Avpi1	3.73733	1.33212	0.356436	2.51772	0		28030	Gfm1	-3.18205	-1.08792	0.341893	0.47044	0
20970	Sdc3	3.73717	1.42098	0.380228	2.67767	0		233204	Tbc1d17	-3.18124	-0.82732	0.260062	0.563575	0
105014	Rdh14	3.73162	1.86817	0.500633	3.6507	0		235041	Ankrd25	-3.1743	-1.08507	0.341829	0.47137	0.023143
53902	Rcan3	3.72391	1.39203	0.37381	2.62448	0		117109	Pop5	-3.17251	-0.9458	0.298123	0.519142	0.023143
72042	Cotl1	3.72083	1.73598	0.466557	3.33105	0		74665	Lrrc48	-3.16748	-1.62124	0.511838	0.325057	0.023143
12739	Cldn3	3.72041	1.71075	0.459828	3.27331	0		68241	9530058B02Rik	-3.16465	-1.08074	0.341503	0.472788	0.023143
27403	Abca7	3.71944	0.916008	0.246276	1.88689	0		14718	Got1	-3.16343	-0.99391	0.314186	0.502116	0.023143
58239	Dexi	3.71866	0.943745	0.253786	1.92352	0		23966	Odz4	-3.16229	-1.56967	0.496372	0.336886	0.023143
27999	D6Wsu176e	3.71661	1.11711	0.300573	2.16912	0		11899	Astn1	-3.16144	-1.55851	0.492974	0.339502	0.023143
216549	Aftph	3.71334	1.17605	0.31671	2.25958	0		12321	Calu	-3.15971	-0.98615	0.3121	0.504824	0.023143
380773	1810035L17Rik	3.71007	1.59604	0.430193	3.02313	0		12181	Bop1	-3.15891	-1.09033	0.345159	0.469654	0.023143
98376	Scyl1bp1	3.70832	1.35074	0.364245	2.55043	0		56309	Mycbp	-3.1511	-0.93459	0.296591	0.523192	0.023143
20319	Sfrp2	3.70798	2.01755	0.54411	4.04895	0		27998	Exosc5	-3.14813	-0.8459	0.2687	0.556362	0.023143
56699	Cdc42ep4	3.707	1.37928	0.372075	2.60139	0		14712	Gnpat	-3.14808	-0.9699	0.308093	0.510541	0.023143
65972	Ifi30	3.69893	1.27423	0.344487	2.4187	0		78134	Gpr23	-3.14719	-1.66643	0.529497	0.315032	0.023143
22099	Tsn	3.69871	1.39994	0.378494	2.6389	0		544963	Iqgap2	-3.14083	-1.1155	0.35516	0.461532	0.023143
241639	5830467P10Rik	3.69655	2.26421	0.612519	4.8039	0		67337	Cstf1	-3.14028	-0.89979	0.286532	0.535964	0.023143
12659	Ovgp1	3.69403	1.06661	0.288738	2.0945	0		22192	Ube2m	-3.13706	-1.14821	0.366014	0.451185	0.023143
99151	Ceecam1	3.69174	1.01895	0.276007	2.02644	0		20974	Syngr3	-3.1362	-0.90931	0.289939	0.532441	0.023143
15412	Hoxb4	3.68924	1.59915	0.433463	3.02965	0		20926	Supt6h	-3.13302	-0.78054	0.249133	0.582149	0.023143
68098	Rchy1	3.68373	1.31188	0.35613	2.48266	0		17427	Mns1	-3.13084	-1.89983	0.606811	0.267975	0.023143
56338	Txnip	3.68082	1.64315	0.446409	3.12348	0		26462	Txnrd2	-3.12849	-1.14651	0.366473	0.451718	0.023143
231464	Cnot6l	3.68029	1.34775	0.366208	2.54515	0		216766	Gemin5	-3.12837	-0.9457	0.302299	0.519177	0.023143
19893	Rpgr	3.67901	1.47613	0.40123	2.78201	0		232431	Gprc5a	-3.12678	-1.62355	0.519239	0.324537	0.023143
66477	Usmg5	3.67523	1.73188	0.471229	3.3216	0		12704	Cit	-3.12362	-1.11978	0.358488	0.460164	0.023143
66993	Smarcd3	3.67263	1.66041	0.452104	3.16106	0		56734	Tulp2	-3.10914	-1.22131	0.392814	0.428892	0.023143
66090	Ypel3	3.67195	1.0298	0.280451	2.04174	0		234915	AK129341	-3.10817	-1.29205	0.415694	0.408371	0.023143
22057	Tob1	3.66787	1.40825	0.383943	2.65416	0		21771	Cirh1a	-3.10561	-0.90393	0.291065	0.534428	0.023143
69815	Krtcap3	3.65953	1.21674	0.332484	2.3242	0		268933	Wdr24	-3.10382	-0.79709	0.25681	0.575509	0.023143
26379	Esrra	3.65825	0.980262	0.26796	1.97282	0		72056	1810055G02Rik	-3.09864	-0.76913	0.248216	0.586771	0.023143
107581	Col16a1	3.65641	1.78957	0.489434	3.45713	0		80902	Zfp202	-3.09846	-0.9254	0.298663	0.526536	0.023143
14114	Fbln1	3.64598	1.02112	0.280066	2.02949	0		76478	2410004L22Rik	-3.09804	-0.89065	0.287488	0.539372	0.023143
66118	1110005A23Rik	3.64499	1.6701	0.45819	3.18236	0		75710	Rbm12	-3.0955	-0.87445	0.28249	0.545463	0.023143
78785	Clip4	3.64039	1.54825	0.425299	2.92463	0		20815	Srpk1	-3.09479	-0.86236	0.278647	0.550054	0.023143
208117	Aph1b	3.62953	1.80314	0.496797	3.48979	0		60510	Syt9	-3.09475	-0.85287	0.275585	0.553683	0.023143
20463	Cox7a2l	3.62344	1.8659	0.514951	3.64494	0		58242	Nudt11	-3.09117	-1.26296	0.40857	0.416688	0.023143
68052	Rps13	3.6185	1.47758	0.408339	2.7848	0		240263	Fem1c	-3.0881	-1.00846	0.326562	0.497077	0.023143
66169	Tomm7	3.61622	1.57602	0.435821	2.98147	0		20856	Stc2	-3.0872	-1.28458	0.416098	0.410491	0.023143
66218	Ndufb9	3.61044	1.60608	0.444842	3.04423	0		53605	Nap1l1	-3.08612	-1.28728	0.417119	0.409723	0.023143
56876	Nelf	3.61001	1.19079	0.329857	2.28277	0		59031	Chst12	-3.08562	-1.1756	0.380993	0.4427	0.023143
64295	Tmub1	3.60692	1.02427	0.283973	2.03393	0		30948	Bin1	-3.08246	-0.79666	0.258448	0.575682	0.023143
13014	Cstb	3.59695	1.13882	0.316607	2.20201	0		14063	F2rl1	-3.08163	-1.57649	0.511577	0.335296	0.023143
23922	Jtb	3.59635	1.13798	0.316426	2.20073	0		21856	Timm44	-3.08067	-1.00305	0.325593	0.498946	0.023143
319262	Fchsd1	3.59613	1.14025	0.317076	2.20419	0		60595	Actn4	-3.07869	-1.51082	0.490733	0.350913	0.023143
11957	Atp5j	3.59502	1.84627	0.513563	3.59569	0		231413	Grsf1	-3.07709	-1.20874	0.392819	0.432647	0.023143
71833	Wdr68	3.5911	1.27458	0.354928	2.41929	0		74254	Xab1	-3.07387	-0.91608	0.298022	0.529947	0.023143
19231	Ptma	3.58709	1.69816	0.473408	3.24486	0		110033	Kif22	-3.07192	-1.07783	0.350865	0.473741	0.023143
54381	Pgcp	3.58637	1.42221	0.396559	2.67995	0		11928	Atp1a1	-3.07061	-0.96992	0.315873	0.510533	0.023143
104886	Rab15	3.58521	1.16451	0.324808	2.24157	0		71707	Ubiad1	-3.06974	-0.9594	0.312533	0.514273	0.023143
67899	2010110K16Rik	3.58513	1.37905	0.384658	2.60097	0		208643	Eif4g1	-3.06808	-0.95803	0.312257	0.514759	0.023143
107986	Ddb2	3.58239	1.02723	0.286744	2.0381	0		76483	Tmem112	-3.06092	-0.84862	0.277243	0.555316	0.023143
66916	Ndufb7	3.57455	1.37869	0.385697	2.60032	0		53945	Slc40a1	-3.06037	-1.34094	0.438163	0.394763	0.023143
224024	Scarf2	3.57276	1.69822	0.475324	3.24499	0		16783	Lamp1	-3.06015	-0.87288	0.28524	0.546057	0.023143
66129	1110018J18Rik	3.57082	1.07323	0.300555	2.10413	0		76071	Jakmip1	-3.05926	-1.04279	0.340862	0.485389	0.023143
14183	Fgfr2	3.56805	1.88921	0.52948	3.70432	0		226026	Smc5	-3.05584	-0.81022	0.265138	0.570295	0.023143
55949	Eef1b2	3.56707	1.51734	0.425374	2.86263	0		70296	Tbc1d13	-3.05306	-0.98073	0.32123	0.506722	0.023143
74718	Snx16	3.56692	0.843303	0.236423	1.79415	0		21808	Tgfb2	-3.05191	-2.10086	0.688376	0.23312	0.023143
12868	Cox8a	3.56592	1.29765	0.363902	2.45827	0		217232	Cdc27	-3.05169	-0.84549	0.277055	0.556523	0.023143
66970	Ssbp2	3.5652	1.40504	0.3941	2.64826	0		52331	Stbd1	-3.05116	-1.07563	0.352532	0.474464	0.023143
71955	2400003C14Rik	3.56488	0.972804	0.272886	1.96265	0		16800	Arhgef2	-3.04989	-1.01035	0.331276	0.496424	0.023143
16664	Krt14	3.56425	2.93859	0.824463	7.66661	0		94187	Zfp423	-3.04984	-1.16199	0.381	0.446896	0.023143
27359	Sytl4	3.56076	1.69376	0.475672	3.23498	0		14681	Gnao1	-3.04595	-1.04366	0.342638	0.485096	0.023143
66167	Ccdc72	3.55992	1.75637	0.493373	3.37846	0		105203	BC016423	-3.04543	-1.03956	0.341352	0.486475	0.023143
11950	Atp5f1	3.55796	2.48787	0.699242	5.60949	0		50790	Acsl4	-3.04405	-1.0143	0.333206	0.49507	0.023143
104725	1110002B05Rik	3.55537	1.52752	0.429638	2.8829	0		50907	Preb	-3.04359	-0.91261	0.299847	0.531223	0.023143
15078	H3f3a	3.55389	1.41435	0.397973	2.6654	0		216443	Mars	-3.04077	-0.99921	0.328604	0.500274	0.023143
18025	Nfe2l3	3.55188	1.96519	0.553284	3.90465	0		71670	Acy3	-3.03881	-1.25099	0.411672	0.420159	0.023143
227723	5830434P21Rik	3.54781	0.988768	0.278698	1.98449	0		99375	Cul4a	-3.03812	-0.82988	0.273156	0.562576	0.023143
269023	Zfp608	3.54578	1.31229	0.370101	2.48336	0		207521	Dtx4	-3.03521	-1.10895	0.365361	0.463632	0.023143
66290	Atp6v1g1	3.54558	2.12739	0.600013	4.36927	0		22431	Wt1	-3.03502	-1.52228	0.501572	0.348135	0.023143
67260	Lass4	3.53695	1.84764	0.522382	3.59912	0		109294	C030045D06Rik	-3.03333	-1.08741	0.358487	0.470605	0.023143
72469	Plcd3	3.53675	1.71693	0.485454	3.28736	0		22420	Wnt6	-3.03073	-2.72265	0.898346	0.151496	0.023143
54353	Skap2	3.53511	1.00092	0.283137	2.00128	0		67602	Necap1	-3.02946	-0.78257	0.258321	0.581329	0.023143
223267	BC006662	3.53356	1.22629	0.347042	2.33965	0		71819	Kif23	-3.02747	-1.03059	0.340414	0.489509	0.023143
27015	Polk	3.53304	1.17924	0.333776	2.26458	0		12160	Bmp5	-3.02628	-0.90701	0.299713	0.533288	0.023143
211347	Pank3	3.53198	1.28605	0.364116	2.4386	0		68015	Trap1	-3.02222	-0.89536	0.29626	0.537611	0.023143
114674	Gtf2ird2	3.52505	1.01629	0.288304	2.02271	0		229589	Prune	-3.02115	-0.81585	0.270047	0.568073	0.023143
66050	0610009B22Rik	3.5245	1.59745	0.453241	3.02607	0		101437	Dhx32	-3.00471	-0.85074	0.283137	0.5545	0.023143
242620	Dmrta2	3.52309	2.43354	0.690741	5.40217	0		67846	Tmem39a	-3.00161	-0.78382	0.261134	0.580826	0.023143
83925	Trps1	3.52306	2.04416	0.580223	4.12433	0		15893	Ica1	-3.00146	-1.00376	0.334422	0.4987	0.023143
57808	Rpl35a	3.517	1.2664	0.36008	2.4056	0		27053	Asns	-2.99965	-1.01407	0.338064	0.495146	0.023143
234384	BC051227	3.51591	1.20963	0.344043	2.31278	0		67036	Mrpl45	-2.99357	-1.35569	0.452867	0.390748	0.023143
18128	Notch1	3.5091	1.69189	0.482144	3.2308	0		85305	Kars	-2.99355	-1.18188	0.394808	0.440778	0.023143
11747	Anxa5	3.50682	1.50555	0.429321	2.83933	0		21379	Tbrg4	-2.98868	-0.83964	0.280939	0.558784	0.023143
170737	Znrf1	3.50625	1.22904	0.350528	2.3441	0		51797	Ctps	-2.98595	-1.19906	0.401566	0.43556	0.023143
330222	Sdk1	3.50326	1.14443	0.326675	2.21059	0		16372	Irx2	-2.98135	-1.6193	0.543143	0.325493	0.023143
20364	Sepw1	3.50118	1.66404	0.47528	3.16904	0		18624	Pepd	-2.97854	-0.94323	0.316677	0.520066	0.023143
76273	Ndfip2	3.49838	1.2429	0.355279	2.36674	0		22375	Wars	-2.97583	-1.08149	0.363425	0.47254	0.023143
72018	Fundc1	3.49787	1.2101	0.345954	2.31354	0		110749	Chaf1b	-2.96791	-0.9786	0.329727	0.507473	0.023143
73373	Phospho2	3.49548	0.77945	0.222988	1.71648	0		212880	Ddx46	-2.96779	-0.85765	0.288986	0.55185	0.023143
67130	Ndufa6	3.4882	1.26545	0.362779	2.40402	0		320011	Ugcgl1	-2.96727	-0.87006	0.29322	0.547122	0.023143
20479	Vps4b	3.48812	1.41862	0.406701	2.6733	0		68730	Dus1l	-2.96638	-0.78715	0.265359	0.579486	0.023143
16419	Itgb5	3.48561	1.11089	0.318707	2.15979	0		56709	Dnajb12	-2.96573	-0.99135	0.33427	0.503006	0.023143
66690	Tmem186	3.4849	0.870185	0.249701	1.8279	0		14050	Eya3	-2.96455	-0.88508	0.298556	0.541456	0.023143
384309	Trim56	3.47946	1.1977	0.34422	2.29374	0		69237	Gtpbp4	-2.96129	-0.73522	0.248277	0.600726	0.023143
68350	0610009K11Rik	3.47195	0.993534	0.28616	1.99106	0		18574	Pde1b	-2.95591	-1.47124	0.497729	0.360672	0.023143
66606	Lrrc57	3.47097	1.62356	0.467755	3.08135	0		69902	Mrto4	-2.95534	-1.29496	0.438176	0.407548	0.023143
56758	Mbnl1	3.4703	1.73632	0.500338	3.33185	0		67554	Slc25a30	-2.95532	-1.28901	0.436166	0.409232	0.023143
20104	Rps6	3.46404	2.33278	0.673429	5.03776	0		21689	Tekt1	-2.95418	-1.00694	0.340854	0.497599	0.023143
68995	Mcts1	3.4638	1.23275	0.355894	2.35014	0		66409	Rsl1d1	-2.94663	-1.11681	0.379012	0.461113	0.023143
75454	Phpt1	3.4633	1.16061	0.335117	2.23552	0		17755	Mtap1b	-2.94517	-1.02169	0.346904	0.492539	0.023143
12614	Celsr1	3.45311	2.7113	0.785176	6.54912	0		27993	Imp4	-2.93925	-1.07028	0.364133	0.476227	0.023143
17268	Meis1	3.44566	1.97966	0.574538	3.94401	0		74133	1200011M11Rik	-2.93748	-1.06105	0.36121	0.479284	0.023143
105501	Abhd4	3.43957	1.07192	0.311642	2.10222	0		67749	4930583H14Rik	-2.92893	-1.46077	0.49874	0.363298	0.023143
14961	H2-Ab1	3.43943	3.06083	0.889925	8.34455	0		384793		-2.92756	-1.07933	0.368678	0.473249	0.023143
56615	Mgst1	3.4388	1.6466	0.478829	3.13095	0		76282	Gpt1	-2.92694	-1.02662	0.35075	0.490858	0.023143
67120	Ttc14	3.43767	0.954139	0.277554	1.93742	0		243819	Saps1	-2.92635	-0.97618	0.333582	0.508325	0.023143
239217	Kctd12	3.43427	1.80423	0.525361	3.49243	0		56863	Cldn9	-2.92237	-0.90174	0.308566	0.53524	0.023143
50868	Keap1	3.43021	0.931345	0.271512	1.90705	0		26417	Mapk3	-2.9206	-1.04416	0.357516	0.484927	0.023143
69890	Zfp219	3.42995	0.875182	0.255159	1.83424	0		216456	Gls2	-2.91987	-0.88081	0.301661	0.543062	0.023143
15894	Icam1	3.42881	1.90866	0.556654	3.7546	0		80987	Nckipsd	-2.91475	-0.76905	0.263849	0.586802	0.023143
387609	Zhx2	3.42818	1.22583	0.357573	2.33889	0		109660	Ctrl	-2.91265	-1.03329	0.354761	0.488593	0.023143
19376	Rab34	3.42488	0.971915	0.28378	1.96144	0		214944	Mobkl2b	-2.91225	-1.36028	0.467088	0.389507	0.023143
17304	Mfge8	3.42409	1.64334	0.479934	3.12388	0		66679	Rae1	-2.91151	-0.87316	0.299899	0.54595	0.023143
208715	Hmgcs1	3.4216	1.11408	0.325604	2.16458	0		14786	Grb7	-2.90991	-1.03763	0.356585	0.487127	0.023143
19821	Rnf2	3.42091	1.21868	0.356244	2.32734	0		231872	Jtv1	-2.9093	-1.10281	0.379065	0.465608	0.023143
19345	Rab5c	3.40741	1.38183	0.405537	2.60599	0		11783	Apaf1	-2.90269	-0.90159	0.310606	0.535296	0.023143
12452	Ccng2	3.40353	1.61915	0.475728	3.07195	0		217737	Ahsa1	-2.9023	-1.11117	0.382859	0.462917	0.023143
52575	Rg9mtd1	3.40035	0.984534	0.289539	1.97867	0		70209	Tmem143	-2.90046	-0.81188	0.279914	0.569639	0.023143
21422	Tcfcp2	3.39954	1.34177	0.39469	2.53461	0		14696	Gnb4	-2.90042	-1.32117	0.455509	0.40021	0.023143
66979	Pole4	3.39895	1.04594	0.307723	2.0647	0		56217	Mpp5	-2.89799	-1.06408	0.367178	0.478279	0.023143
19729	Rag1ap1	3.39868	1.2612	0.371087	2.39696	0		229003	BC006779	-2.89663	-1.04824	0.361882	0.483559	0.023143
12864	Cox6c	3.39775	1.22396	0.360227	2.33587	0		14208	Ppm1g	-2.89568	-1.74363	0.602149	0.298618	0.023143
68028	Rpl22l1	3.39708	1.85851	0.547089	3.62632	0		52206	Anapc4	-2.89255	-0.81043	0.280177	0.570213	0.023143
20787	Srebf1	3.39142	0.81177	0.23936	1.75536	0		108147	Atic	-2.89174	-1.47819	0.511176	0.358939	0.023143
67164	2610209A20Rik	3.3902	1.25914	0.371407	2.39354	0		218973	Wdhd1	-2.88047	-1.42106	0.493343	0.373438	0.023143
100972	Rab28	3.38723	1.00041	0.295348	2.00057	0		56697	Akap10	-2.87903	-0.8261	0.286936	0.564052	0.023143
73078	Pmpcb	3.37833	1.55209	0.459424	2.93241	0		104721	Ddx1	-2.87605	-0.8129	0.282646	0.569235	0.023143
68193	Rpl24	3.37422	1.50113	0.444884	2.83065	0		23918	Impdh2	-2.87354	-1.02581	0.356984	0.491136	0.023143
59090	Midn	3.36855	1.02128	0.30318	2.02971	0		74198	Dtx2	-2.87236	-0.80902	0.281658	0.570768	0.023143
51813	Ccnc	3.36679	0.933773	0.277348	1.91026	0		67389	C1qdc2	-2.87107	-1.22269	0.425867	0.428482	0.023143
16553	Kif13a	3.36065	1.01696	0.302606	2.02364	0		77593	Usp45	-2.86694	-0.92072	0.321151	0.528246	0.023143
55927	Hes6	3.35763	2.0303	0.604683	4.08491	0		329910	Acot11	-2.86561	-0.73402	0.256149	0.601225	0.023143
243912	Hspb6	3.3534	1.38823	0.413978	2.61758	0		241447	Lass6	-2.86414	-1.03316	0.360721	0.48864	0.023143
12836	Col7a1	3.35221	2.38301	0.710879	5.21625	0		225363	Etf1	-2.86286	-0.96841	0.338267	0.511069	0.023143
76974	1190003J15Rik	3.35049	1.57431	0.469875	2.97793	0		73674	Wdr75	-2.8628	-0.84656	0.295709	0.556111	0.023143
18538	Pcna	3.34897	1.54012	0.459879	2.90818	0		105083	Pelo	-2.86219	-0.89042	0.311098	0.539456	0.023143
56739	Rec8	3.3475	1.45393	0.434334	2.73954	0		433702	AU014645	-2.86144	-1.05868	0.369983	0.48007	0.023143
52653	Nudcd2	3.34684	1.48598	0.443993	2.80107	0		16004	Igf2r	-2.85802	-0.99652	0.348675	0.501207	0.023143
108899	2700081O15Rik	3.34404	1.39003	0.415675	2.62085	0		320560	D030011O10Rik	-2.85681	-0.93866	0.32857	0.521716	0.023143
12747	Clk1	3.34365	0.918354	0.274656	1.88996	0		18408	Slc25a15	-2.8546	-0.70663	0.247542	0.612748	0.023143
101540	Prkd2	3.34019	1.2694	0.380037	2.41061	0		12159	Bmp4	-2.8516	-1.60268	0.56203	0.329264	0.023143
217038	Mrm1	3.33977	1.02305	0.306322	2.03221	0		18970	Polb	-2.84953	-0.92332	0.324025	0.527294	0.023143
235534	Acpl2	3.33811	0.837722	0.250957	1.78723	0		56057	Btg4	-2.84859	-0.9437	0.331286	0.519898	0.023143
18709	Pik3r2	3.32986	0.925213	0.277853	1.89896	0		56457	Clptm1	-2.84678	-0.87824	0.308503	0.544031	0.023143
15254	Hint1	3.32722	1.64919	0.495667	3.13658	0		19272	Ptprk	-2.84249	-0.88641	0.311842	0.540959	0.023143
56382	Rab9	3.32325	1.47624	0.444215	2.78222	0		216881	Wscd1	-2.84039	-1.09642	0.386009	0.467677	0.023143
74646	Spsb1	3.32237	2.0884	0.628588	4.25276	0		12190	Brca2	-2.8393	-0.81242	0.286135	0.569425	0.023143
70984	4931406C07Rik	3.32182	1.71093	0.515059	3.27372	0		207952	Klhl25	-2.83924	-0.93497	0.329302	0.523054	0.023143
17846	Commd1	3.32165	1.1129	0.335046	2.16281	0		26403	Map3k11	-2.83773	-0.63514	0.22382	0.643879	0.023143
29810	Bag3	3.31777	1.03573	0.312176	2.05015	0		13401	Dmwd	-2.83406	-0.7167	0.252888	0.608488	0.023143
83409	Mapbpip	3.31599	1.16035	0.349925	2.23511	0		66717	Ccdc96	-2.82943	-0.91351	0.32286	0.530892	0.023143
56706	Ccnl1	3.31131	1.25756	0.379779	2.39092	0		217353	Tmc6	-2.82822	-0.74278	0.26263	0.597588	0.023143
20250	Scd2	3.30978	1.16782	0.35284	2.24672	0		67849	Cdca5	-2.82638	-0.88363	0.312636	0.542003	0.023143
22666	Zfp161	3.30334	1.30388	0.394715	2.46892	0		67437	Ssr3	-2.82422	-0.95965	0.339793	0.514182	0.023143
28295	D10Jhu81e	3.30147	1.15885	0.35101	2.23279	0		66775	Ptplad2	-2.82359	-1.32972	0.470933	0.397846	0.023143
69546	Mapk1ip1	3.30072	0.975496	0.295541	1.96632	0		54200	Sult2b1	-2.8225	-1.05286	0.373023	0.482012	0.023143
76954	St5	3.29937	1.152	0.349159	2.22222	0		74178	Stk40	-2.81771	-1.01259	0.359366	0.495655	0.023143
18646	Prf1	3.29618	2.34391	0.711099	5.07677	0		233410	Zfp592	-2.81434	-0.97229	0.345478	0.509695	0.023143
65945	Clstn1	3.28808	1.49005	0.453169	2.809	0		66938	1700029G01Rik	-2.81353	-1.11949	0.397893	0.460258	0.023143
13497	Drp2	3.28167	0.980757	0.298859	1.9735	0		11907	Ate1	-2.80289	-0.79811	0.284744	0.575104	0.023143
17961	Nat2	3.27886	1.11206	0.33916	2.16154	0		18107	Nmt1	-2.80168	-0.76845	0.274282	0.587048	0.023143
214469	BC043098	3.27633	1.17434	0.358432	2.2569	0		270906	Prr11	-2.80012	-0.91308	0.326084	0.531052	0.023143
54169	Myst4	3.27622	0.90777	0.277078	1.87614	0		236930	Ercc6l	-2.79932	-0.75349	0.26917	0.593166	0.023143
109042	Prkcdbp	3.27257	1.42116	0.434265	2.67801	0		30841	Fbxl10	-2.79518	-0.86223	0.308469	0.550103	0.023143
244853	D930028F11Rik	3.27157	2.13329	0.652068	4.38716	0		13194	Ddb1	-2.79166	-0.97108	0.347851	0.510123	0.023143
18024	Nfe2l2	3.27144	1.49871	0.45812	2.8259	0		22253	Unc5c	-2.7915	-1.64849	0.59054	0.318973	0.023143
16010	Igfbp4	3.26897	1.9029	0.582111	3.73965	0		83603	Elovl4	-2.79026	-0.84347	0.302292	0.5573	0.023143
330914	Grit	3.26553	1.14271	0.349932	2.20796	0		66592	Stoml2	-2.78972	-1.11732	0.400514	0.460948	0.023143
66904	Pccb	3.26291	0.993231	0.304401	1.99064	0		56347	Eif3c	-2.78816	-1.6169	0.579914	0.326036	0.023143
29871	Scmh1	3.26134	1.03995	0.318871	2.05615	0		12648	Chd1	-2.78775	-1.52616	0.547451	0.347201	0.023143
68612	Ube2c	3.26043	1.07999	0.331241	2.11402	0		67213	Cmtm6	-2.78768	-0.73524	0.263748	0.600716	0.023143
50781	Dkk3	3.25723	1.58277	0.485924	2.99544	0		380959	Alg10b	-2.78696	-0.83783	0.300624	0.559485	0.023143
246703	Apoa1bp	3.25678	1.03178	0.316812	2.04455	0		381038	Parl	-2.78638	-0.8364	0.300173	0.560041	0.023143
329015	Atg2a	3.25588	1.41357	0.434158	2.66395	0		214137	Arhgap29	-2.7827	-1.30782	0.469983	0.40393	0.023143
233011	Itpkc	3.25493	1.31507	0.404025	2.48815	0		14705	Bscl2	-2.78026	-0.81132	0.291815	0.569859	0.023143
50887	Nsbp1	3.25045	1.80055	0.55394	3.48354	0		66965	2310061F22Rik	-2.77938	-0.93026	0.334702	0.524763	0.023143
20641	Snrpd1	3.2493	1.91535	0.589465	3.77205	0		12258	Serping1	-2.77759	-1.16472	0.419329	0.44605	0.023143
56468	Socs5	3.24088	1.23917	0.382357	2.36063	0		18817	Plk1	-2.77741	-1.28751	0.463564	0.409658	0.023143
74098	0610037L13Rik	3.24078	1.11428	0.343829	2.16486	0		229877	Rap1gds1	-2.7749	-0.77327	0.278664	0.585092	0.023143
83965	Enpp5	3.23823	1.60411	0.495367	3.04008	0		67553	Gstcd	-2.7734	-0.82401	0.297112	0.564869	0.023143
19714	Rev3l	3.23688	1.55843	0.481459	2.94532	0		72287	Plekhf1	-2.76973	-0.89449	0.32295	0.537939	0.023143
68537	Mrpl13	3.23583	1.31642	0.406827	2.49048	0		109637	Upk1a	-2.76707	-1.38337	0.499939	0.383323	0.023143
233280	Nipa1	3.23398	0.948841	0.293397	1.93032	0		57170	Dolpp1	-2.76343	-0.8189	0.296336	0.566873	0.023143
70078	Nol7	3.23392	1.36333	0.421573	2.57279	0		29870	Gtse1	-2.76306	-0.83915	0.303704	0.558972	0.023143
55978	Ift20	3.23385	1.00733	0.311495	2.01018	0		19384	Ran	-2.76008	-1.07374	0.389026	0.475085	0.023143
19055	Ppp3ca	3.23339	1.3992	0.432735	2.63755	0		71981	2410004F06Rik	-2.75911	-0.86923	0.315041	0.547437	0.023143
16564	Kif21a	3.23298	1.2964	0.400992	2.45615	0		72935	Ddx41	-2.75768	-0.69023	0.250294	0.619755	0.023143
68614	Letmd1	3.23234	1.29154	0.399566	2.44788	0		108673	Ccdc86	-2.75501	-0.78229	0.283954	0.581442	0.023143
29806	Limd1	3.2321	1.19642	0.370167	2.2917	0		106840	Unc119b	-2.75274	-0.77991	0.283322	0.582402	0.023143
629605		3.23117	1.24859	0.386419	2.37608	0		11785	Apbb1	-2.74791	-1.02187	0.371872	0.492477	0.023143
66866	Nhlrc2	3.2282	0.834301	0.258442	1.78299	0		432720	Akr1c19	-2.74467	-1.86636	0.679995	0.274264	0.023143
230098	E130306D19Rik	3.22402	1.21785	0.377744	2.326	0		12257	Tspo	-2.74365	-0.97369	0.354887	0.509203	0.023143
142688	Asb13	3.21957	1.19618	0.371536	2.29133	0		217431	Nol10	-2.74288	-0.72704	0.265064	0.604143	0.023143
58802	Kcnmb4	3.2184	0.909438	0.282574	1.87831	0		75296	Fgfr1op	-2.74287	-0.73269	0.267126	0.60178	0.023143
233274	Siglech	3.21479	1.44929	0.450821	2.73074	0		27374	Prmt5	-2.74282	-1.07703	0.392673	0.474004	0.023143
67143	Ikzf5	3.21046	1.55979	0.485847	2.94811	0		27225	Ddx24	-2.74257	-0.77005	0.280776	0.586397	0.023143
68552	1110003E01Rik	3.204	0.978489	0.305396	1.9704	0		195522	Zfp691	-2.74224	-0.86495	0.315416	0.549067	0.023143
30960	Vapa	3.20317	1.39052	0.434107	2.62173	0		66375	Dhrs7	-2.74194	-0.96083	0.35042	0.51376	0.023143
56351	Ptges3	3.20025	1.20794	0.377451	2.31007	0		214572	Prmt7	-2.74161	-0.85628	0.312327	0.552376	0.023143
382051	4833426J09Rik	3.19739	0.908233	0.284055	1.87675	0		13496	Arid3a	-2.73982	-1.34625	0.491365	0.393313	0.023143
252973	Grhl2	3.19527	1.23532	0.386609	2.35434	0		73804	Kif2c	-2.73574	-0.90208	0.32974	0.535114	0.023143
66609	Cryzl1	3.19513	1.0919	0.341738	2.13155	0		14923	Guk1	-2.7301	-0.93121	0.34109	0.524418	0.023143
22417	Wnt4	3.18778	1.33232	0.417946	2.51807	0		232679	Zc3hc1	-2.72964	-1.08601	0.397858	0.471062	0.023143
68094	Smarcc2	3.18762	1.13329	0.355528	2.19358	0		234699	Edc4	-2.72617	-0.80828	0.29649	0.571061	0.023143
12700	Cish	3.18125	1.06563	0.334971	2.09308	0		211548	Nomo1	-2.72405	-0.96237	0.353286	0.513214	0.023143
13875	Erf	3.17941	0.982311	0.30896	1.97563	0		76829	Dok5	-2.71917	-1.35424	0.498033	0.391142	0.023143
14735	Gpc4	3.1793	1.04763	0.329516	2.06713	0		54722	Dfna5h	-2.71908	-0.8597	0.316174	0.551066	0.023143
80795	Selk	3.17894	1.54601	0.486328	2.92008	0		216760	Mfap3	-2.71822	-0.70983	0.261139	0.61139	0.023143
17749	Polr2k	3.17756	1.68986	0.531811	3.22625	0		57753	Noc3l	-2.71721	-0.9947	0.366075	0.501839	0.023143
50785	Hs6st1	3.17733	1.12256	0.353303	2.17733	0		67588	Rnf41	-2.71229	-0.97416	0.359166	0.509035	0.023143
16709	Ktn1	3.17542	1.14989	0.362121	2.21896	0		243923	Rgs9bp	-2.70288	-0.81469	0.301414	0.568532	0.023143
11744	Anxa11	3.17417	2.1991	0.692812	4.59193	0		67169	Nradd	-2.70245	-1.1163	0.413068	0.461276	0.023143
68842	Tulp4	3.17347	1.11754	0.352152	2.16977	0		20719	Serpinb6a	-2.70143	-0.82845	0.306671	0.563134	0.023143
30794	Pdlim4	3.17227	1.45997	0.460229	2.75103	0		28075	D15Wsu75e	-2.70073	-0.72259	0.267552	0.60601	0.023143
67610	Rspry1	3.17018	1.13311	0.357427	2.19331	0		230082	Nol6	-2.70006	-0.85264	0.315785	0.553771	0.023143
74411	Ppapdc2	3.16977	1.46179	0.461166	2.7545	0		14402	Gabrb3	-2.69944	-1.54693	0.573056	0.342237	0.023143
114663	Impa2	3.16784	0.947256	0.299023	1.9282	0		54650	Sfmbt1	-2.69771	-1.00389	0.372129	0.498652	0.023143
268977	Ltbp1	3.16647	1.25957	0.397784	2.39424	0		13361	Dhfr	-2.69495	-0.76774	0.284883	0.587335	0.023143
20848	Stat3	3.15814	1.31323	0.415824	2.48498	0		50884	Nckap1	-2.69294	-0.94304	0.350188	0.520137	0.023143
56314	Zfp113	3.15729	1.16175	0.367956	2.23728	0		20190	Ryr1	-2.6918	-0.92354	0.343095	0.527213	0.023143
12043	Bcl2	3.15604	1.01276	0.320896	2.01777	0		18720	Pip5k1a	-2.69144	-0.96187	0.357379	0.513393	0.023143
101148	B630005N14Rik	3.15585	1.18491	0.375465	2.27349	0		72503	2610507B11Rik	-2.6899	-0.8315	0.30912	0.561945	0.023143
319158	Hist1h4i	3.15116	1.35237	0.429167	2.55332	0		69718	Ipmk	-2.68945	-0.66752	0.248201	0.629586	0.023143
17385	Mmp11	3.15049	1.49855	0.475655	2.82558	0		67839	Gpsm1	-2.68807	-1.0288	0.38273	0.490116	0.023143
170930	Sumo2	3.14818	1.14818	0.364711	2.21634	0		108909	2610208M17Rik	-2.68713	-0.79848	0.29715	0.574954	0.023143
70785	Dennd1c	3.14608	1.64054	0.521456	3.11783	0		384814	EG384814	-2.68449	-0.78503	0.292432	0.58034	0.023143
66291	1810030N24Rik	3.14539	1.14077	0.362681	2.20499	0		20913	Stxbp4	-2.68218	-0.77668	0.289568	0.58371	0.023143
225887	Ndufs8	3.14504	0.932741	0.296576	1.9089	0		72151	Rfc5	-2.68158	-0.84396	0.314726	0.557111	0.023143
15182	Hdac2	3.14426	0.94565	0.300754	1.92606	0		71957	Cpsf3l	-2.6815	-0.94816	0.353591	0.518294	0.023143
230726	Rhbdl2	3.14203	1.77364	0.564489	3.41915	0		67468	Mmd	-2.68047	-1.24779	0.465512	0.421093	0.023143
59043	Wsb2	3.13528	0.860449	0.274441	1.8156	0		70603	Mutyh	-2.68009	-0.75215	0.280643	0.593719	0.023143
16886	Limk2	3.13259	0.872892	0.278648	1.83133	0		65102	Nif3l1	-2.67944	-0.94086	0.35114	0.520924	0.023143
319530	Zfp750	3.13163	2.62223	0.837336	6.157	0		80280	Cdk5rap3	-2.67674	-0.75599	0.282429	0.592141	0.023143
66315	Senp7	3.1293	1.04734	0.334689	2.06672	0		18516	Pbx3	-2.67614	-1.41284	0.527939	0.375573	0.023143
68949	1500012F01Rik	3.12811	1.1095	0.354686	2.1577	0		77579	Myh10	-2.67291	-1.01999	0.381604	0.493118	0.023143
14026	Evl	3.12719	1.29236	0.413264	2.44928	0		72634	Tdrkh	-2.67284	-0.9754	0.364931	0.508598	0.023143
72562	Pcbd2	3.12675	1.15243	0.368571	2.22288	0		109006	Ciapin1	-2.67259	-0.94792	0.354683	0.518378	0.023143
21413	Tcf4	3.12267	1.08493	0.347437	2.12127	0		259277	Klk8	-2.67241	-0.83463	0.312314	0.560726	0.023143
84035	Kremen1	3.12099	0.915805	0.293434	1.88662	0		21912	Tspan7	-2.67141	-1.1008	0.412066	0.466259	0.023143
14081	Acsl1	3.1166	1.03771	0.332962	2.05297	0		11630	Aim1	-2.67029	-1.00101	0.374868	0.499651	0.023143
67443	Map1lc3b	3.11581	1.09585	0.351706	2.13739	0		100102	Pcsk9	-2.66456	-1.1162	0.418905	0.461308	0.023143
270135	BC038156	3.11575	0.969096	0.311031	1.95761	0		217325	Llgl2	-2.66295	-0.97749	0.367071	0.507862	0.023143
19684	Rdx	3.11535	0.967538	0.310571	1.9555	0		99571	Fgg	-2.66168	-1.14976	0.431969	0.450699	0.023143
12527	Cd9	3.11362	0.808154	0.259554	1.75097	0		226747	Ahctf1	-2.6564	-0.86328	0.324981	0.549701	0.023143
106947	Slc39a3	3.10657	1.02794	0.330891	2.0391	0		66653	Brf2	-2.65639	-0.7157	0.269426	0.608909	0.023143
20621	Snn	3.10019	1.05328	0.339747	2.07524	0		23830	Capn10	-2.65306	-0.77826	0.293345	0.583068	0.023143
66094	Lsm7	3.09832	1.06994	0.345329	2.09935	0		68043	N6amt2	-2.65206	-1.48743	0.560859	0.356647	0.023143
235584	Dusp7	3.0923	1.21825	0.393962	2.32664	0		56395	Tmem115	-2.64906	-0.91785	0.34648	0.529298	0.023143
29817	Igfbp7	3.08994	1.81047	0.585923	3.50756	0		108888	Atad3a	-2.64627	-0.88024	0.332636	0.543275	0.023143
14368	Fzd6	3.08785	1.75579	0.568613	3.37711	0		26360	Angptl2	-2.64465	-0.8305	0.314031	0.562333	0.023143
434858		3.08771	3.51463	1.13826	11.429	0		320213	Senp5	-2.64011	-0.64645	0.244859	0.638849	0.033341
170758	Rac3	3.08639	1.12129	0.3633	2.17541	0		170750	Xpnpep1	-2.63989	-1.24963	0.473366	0.420556	0.033341
67980	Gnpda2	3.08575	2.57708	0.835156	5.96731	0		72141	Adpgk	-2.63661	-0.8176	0.310095	0.567385	0.033341
195733	Grhl1	3.08556	1.1773	0.38155	2.26153	0		17158	Man2a1	-2.63258	-1.04286	0.396135	0.485365	0.033341
14707	Gng5	3.08351	2.15518	0.698936	4.45423	0		23954	Nek3	-2.63124	-0.77548	0.294719	0.584196	0.033341
433904	Ociad2	3.08286	1.38703	0.449915	2.61539	0		239528	Eif2c2	-2.62635	-0.7333	0.27921	0.601525	0.033341
74205	Acsl3	3.07741	1.0265	0.333561	2.03708	0		209239	Gan	-2.62566	-0.82283	0.313382	0.56533	0.033341
106957	Slc39a6	3.07374	1.12818	0.36704	2.18583	0		78514	Arhgap10	-2.62564	-0.9728	0.370501	0.509515	0.033341
66660	Sltm	3.07158	0.935809	0.304667	1.91296	0		232187	Smyd5	-2.62212	-0.98806	0.376818	0.504154	0.033341
208820	OTTMUSG00000004461	3.07062	1.09654	0.357108	2.13842	0		278240	Spin2	-2.62056	-1.04372	0.398282	0.485074	0.033341
73024	2900064A13Rik	3.06818	1.48067	0.482588	2.79078	0		12348	Car11	-2.61955	-0.77427	0.295573	0.584685	0.033341
110310	Krt7	3.06647	1.82764	0.596007	3.54955	0		234577	Cpne2	-2.61927	-0.85422	0.326129	0.553164	0.033341
22210	Ube2b	3.06605	0.855573	0.279047	1.80948	0		245670	Rragb	-2.61734	-0.84818	0.324062	0.555484	0.033341
18537	Pcmt1	3.0646	1.06291	0.346833	2.08913	0		223626	4930572J05Rik	-2.61385	-0.91078	0.348445	0.531896	0.033341
67739	4930570C03Rik	3.06299	1.23981	0.404772	2.36168	0		20340	Glg1	-2.6135	-0.71364	0.27306	0.60978	0.033341
103765	Tmem17	3.0609	1.12732	0.368299	2.18453	0		13803	Enc1	-2.61039	-1.14371	0.438139	0.452594	0.033341
239393	Lrp12	3.05987	1.02544	0.335124	2.03557	0		13478	Dpagt1	-2.60637	-0.7653	0.293628	0.588329	0.033341
226861	Hhat	3.05385	1.03323	0.338335	2.04659	0		52906	Ahi1	-2.60478	-0.83598	0.320942	0.560201	0.033341
66836	0610006I08Rik	3.04827	1.09632	0.359652	2.13808	0		71765	Klhdc3	-2.60295	-0.79101	0.303889	0.577941	0.033341
69641	Wdr20a	3.04791	0.738475	0.242289	1.66841	0		110355	Adrbk1	-2.60202	-0.77701	0.298619	0.583575	0.033341
21886	Tle2	3.04767	1.17366	0.3851	2.25583	0		27355	X99384	-2.60168	-0.72658	0.279274	0.604334	0.033341
67116	Cuedc2	3.04504	0.926587	0.304294	1.90077	0		246710	Rhobtb2	-2.60128	-0.74455	0.286225	0.596853	0.033341
100169	Phactr4	3.0423	0.92447	0.303872	1.89799	0		57028	Pdxp	-2.6008	-1.0155	0.390458	0.494656	0.033341
26370	Cetn2	3.04129	1.36146	0.44766	2.56946	0		433182		-2.60022	-1.1635	0.447462	0.446429	0.033341
20200	S100a6	3.03605	1.63893	0.539823	3.11434	0		72749	Nfkbil2	-2.59909	-0.79244	0.304889	0.577369	0.033341
53869	Rab11a	3.03565	1.06825	0.351902	2.09689	0		230752	2610027C15Rik	-2.59829	-1.58782	0.611103	0.332674	0.033341
216742	Fnip1	3.03178	1.00734	0.332262	2.01021	0		214669	L3mbtl2	-2.59768	-1.11424	0.428937	0.461933	0.033341
53334	Gosr1	3.03168	0.905863	0.298799	1.87366	0		170759	Atp13a1	-2.59614	-0.72317	0.278554	0.605767	0.033341
233016	Blvrb	3.02896	1.38689	0.457878	2.61515	0		239743	Klhl6	-2.59509	-0.75478	0.290851	0.592635	0.033341
66152	1110020P15Rik	3.02699	1.17484	0.388123	2.25768	0		252972	Tpcn1	-2.59412	-0.90943	0.350574	0.532394	0.033341
268448	Phf12	3.02657	0.967196	0.319568	1.95504	0		83767	Wasf1	-2.59221	-0.71032	0.274021	0.611184	0.033341
76900	Ssbp4	3.02636	1.49442	0.493803	2.81752	0		94219	Cnnm2	-2.5878	-0.68866	0.266119	0.620428	0.033341
68002	1110058L19Rik	3.02376	1.08591	0.359124	2.12271	0		239759	Liph	-2.58629	-1.06251	0.410824	0.478798	0.033341
58809	Rnase4	3.0223	1.67817	0.555262	3.20021	0		56412	2610024G14Rik	-2.58519	-0.89561	0.346439	0.53752	0.033341
56440	Snx1	3.01632	1.29262	0.42854	2.44972	0		54219	Cd320	-2.58517	-1.03183	0.399132	0.489091	0.033341
66925	Sdhd	3.01462	1.1299	0.374808	2.18844	0		20743	Spnb3	-2.58416	-1.11045	0.429712	0.463151	0.033341
217887	BC022687	3.01174	0.996306	0.330807	1.99489	0.0197545		94216	Col4a6	-2.58381	-0.91399	0.353736	0.530716	0.033341
15441	Hp1bp3	3.00858	1.19909	0.398555	2.29594	0.0197545		50759	Fbxo16	-2.58178	-0.68153	0.263977	0.623504	0.033341
544752	Tug1	2.99409	0.71256	0.237988	1.63871	0.0197545		210925	Ints9	-2.58071	-0.74289	0.28786	0.597543	0.033341
106869	Tnfaip8	2.99407	1.02477	0.342267	2.03463	0.0197545		243574	Kbtbd8	-2.57596	-0.93879	0.364443	0.521669	0.033341
433256	Acsl5	2.99221	1.13179	0.378245	2.1913	0.0197545		67630	Samd8	-2.57588	-0.71136	0.276163	0.610743	0.033341
99167	Ssx2ip	2.98889	0.898148	0.300496	1.86367	0.0197545		269523	Vcp	-2.57439	-0.71238	0.276719	0.610311	0.033341
12934	Dpysl2	2.98671	1.13046	0.378496	2.18928	0.0197545		67149	Nkain1	-2.57168	-0.81315	0.316194	0.569139	0.033341
66569	Gdpd1	2.98305	0.820766	0.275143	1.76634	0.0197545		108954	Ppp1r15b	-2.56941	-0.83025	0.323128	0.562432	0.033341
52588	Tspan14	2.98283	0.819678	0.274798	1.76501	0.0197545		242291	Impad1	-2.56652	-0.88176	0.343563	0.542705	0.033341
66105	Ube2d3	2.98209	0.746589	0.250357	1.67782	0.0197545		224907	Dus3l	-2.56603	-0.77094	0.30044	0.586036	0.033341
69161	Manbal	2.97951	1.39441	0.468	2.62882	0.0197545		239099	Homez	-2.56522	-0.63517	0.247607	0.643866	0.033341
320808	Wdr22	2.97694	0.890893	0.299265	1.85432	0.0197545		67724	Pop1	-2.56411	-0.74011	0.288643	0.598693	0.033341
12626	Cetn3	2.97262	1.00261	0.337281	2.00362	0.0197545		77040	Atg16l1	-2.56307	-0.83285	0.324944	0.561418	0.033341
53883	Celsr2	2.97167	1.22931	0.413677	2.34455	0.0197545		20901	Strap	-2.56219	-0.70361	0.274615	0.614032	0.033341
20779	Src	2.97092	1.16247	0.391284	2.23841	0.0197545		104458	Rars	-2.55452	-1.07693	0.421581	0.474035	0.033341
15410	Hoxb3	2.97034	1.59105	0.535648	3.0127	0.0197545		16210	Impact	-2.55046	-0.91277	0.357884	0.531164	0.033341
214459	Fnbp1l	2.96931	0.864594	0.291176	1.82083	0.0197545		217944	Rapgef5	-2.54933	-1.45599	0.571128	0.364504	0.033341
15212	Hexb	2.96856	1.23192	0.414991	2.3488	0.0197545		75317	4930547N16Rik	-2.54926	-0.83096	0.32596	0.562156	0.033341
243725	Ppp1r9a	2.9658	0.980025	0.330442	1.9725	0.0197545		27407	Abcf2	-2.54857	-1.1129	0.436677	0.462363	0.033341
231070	Insig1	2.96166	1.07548	0.363135	2.10743	0.0197545		268880	AI480653	-2.54604	-0.84871	0.333345	0.555282	0.033341
20350	Sema3f	2.95757	1.11473	0.376907	2.16554	0.0197545		78796	Zcchc4	-2.54394	-0.81505	0.320387	0.56839	0.033341
230857	Ece1	2.95626	1.14169	0.386193	2.20639	0.0197545		109232	Sccpdh	-2.54355	-0.65938	0.259238	0.633149	0.033341
230824	Grhl3	2.95562	1.36921	0.463255	2.58328	0.0197545		399568	BC052040	-2.54327	-0.67823	0.266677	0.624931	0.033341
77697	Mmab	2.95208	1.07812	0.365208	2.11129	0.0197545		74666	4930432K21Rik	-2.54098	-0.754	0.296735	0.592957	0.033341
209462	Hace1	2.95129	1.18548	0.401681	2.27438	0.0197545		54447	Asah2	-2.5374	-1.07886	0.425184	0.473403	0.033341
56358	Copz2	2.94456	1.04635	0.355351	2.0653	0.0197545		234686	Fhod1	-2.53492	-1.04636	0.412778	0.484189	0.033341
22166	Txn1	2.93983	1.32732	0.451496	2.50936	0.0197545		14369	Fzd7	-2.53276	-0.86386	0.341073	0.549482	0.033341
64143	Ralb	2.93679	0.851384	0.289903	1.80423	0.0197545		242894	Actr3b	-2.53176	-0.82935	0.327577	0.562785	0.033341
72748	Hdhd3	2.93538	1.33226	0.453863	2.51797	0.0197545		13393	Dlx3	-2.53112	-1.15943	0.458069	0.447691	0.033341
226118	AI606181	2.93502	0.972684	0.331407	1.96249	0.0197545		110208	Pgd	-2.53043	-0.77618	0.30674	0.583909	0.033341
75458	Cklf	2.93302	1.28326	0.437521	2.43388	0.0197545		12544	Cdc45l	-2.53024	-0.98965	0.391128	0.503601	0.033341
67830	Rer1	2.93224	0.880472	0.300272	1.84098	0.0197545		21401	Tcea3	-2.52419	-1.00752	0.399144	0.497402	0.033341
66469	2810405K02Rik	2.93145	0.975726	0.332847	1.96663	0.0197545		101358	Fbxl14	-2.52052	-0.87444	0.34693	0.545464	0.033341
12974	Cs	2.92703	0.832879	0.284547	1.78124	0.0197545		101568	Vrk3	-2.52018	-0.67131	0.266373	0.627937	0.033341
54367	Zfp326	2.92384	0.993985	0.339959	1.99168	0.0197545		231238	2310045A20Rik	-2.51965	-1.18093	0.468687	0.441068	0.033341
67844	Rab32	2.9233	1.3422	0.459138	2.53537	0.0197545		53614	Reck	-2.51956	-1.21974	0.484107	0.429361	0.033341
12520	Cd81	2.92136	0.762631	0.261054	1.69658	0.0197545		66422	2410015N17Rik	-2.51864	-0.97808	0.388336	0.507655	0.033341
66071	Ethe1	2.91311	1.0791	0.37043	2.11272	0.0197545		69524	Esam1	-2.51673	-1.03931	0.412959	0.486561	0.033341
170826	Ppargc1b	2.91249	1.55942	0.535426	2.94736	0.0197545		212398	Frat2	-2.51654	-0.94278	0.374635	0.520228	0.033341
229474	6330505N24Rik	2.90608	1.05107	0.361678	2.07206	0.0197545		100121	Tdrd7	-2.51622	-1.3009	0.517006	0.405873	0.033341
52639	Wipi1	2.90594	0.950171	0.326975	1.9321	0.0197545		213019	Pdlim2	-2.51543	-0.63354	0.251862	0.644592	0.033341
110052	Dek	2.90531	1.06809	0.367636	2.09666	0.0197545		72171	Shq1	-2.514	-0.99938	0.397524	0.500216	0.033341
72320	2510003E04Rik	2.9039	1.21629	0.418847	2.32349	0.0197545		109333	Pkn2	-2.51211	-0.59551	0.237057	0.661809	0.033341
71893	Noxo1	2.90265	1.07823	0.371464	2.11145	0.0197545		67145	Tomm34	-2.51206	-0.83022	0.330492	0.562445	0.033341
110173	Manba	2.90251	0.74893	0.258028	1.68055	0.0197545		13688	Eif4ebp2	-2.51072	-0.85684	0.341271	0.552162	0.033341
319604	B930006L02Rik	2.90173	0.820248	0.282676	1.76571	0.0197545		107392	Brms1	-2.50936	-0.76938	0.306604	0.586669	0.033341
18260	Ocln	2.90001	0.935846	0.322705	1.91301	0.0197545		56085	Ubqln1	-2.50872	-1.09311	0.435724	0.468749	0.033341
13831	Epc1	2.89966	0.794324	0.273937	1.73426	0.0197545		30877	Gnl3	-2.50604	-0.88486	0.35309	0.541541	0.033341
110460	Acat2	2.89904	0.950909	0.328008	1.93309	0.0197545		67119	2510048L02Rik	-2.50216	-0.74029	0.29586	0.59862	0.033341
224598	Zfp758	2.89598	0.841558	0.290595	1.79198	0.0197545		13667	Eif2b4	-2.50055	-0.68516	0.274005	0.621936	0.033341
12861	Cox6a1	2.89285	1.12445	0.388698	2.18018	0.0197545		102614	Rpp25	-2.50044	-1.17034	0.468055	0.444316	0.033341
18230	Nxn	2.89065	0.875037	0.302713	1.83405	0.0197545		93691	Klf7	-2.49987	-1.21114	0.484481	0.431927	0.033341
21400	Tcea2	2.88933	0.964726	0.333892	1.95169	0.0197545		140486	Igf2bp1	-2.49864	-0.73482	0.294088	0.600892	0.033341
14768	Lancl1	2.88894	0.915513	0.316903	1.88624	0.0197545		14156	Fen1	-2.4958	-0.64319	0.25771	0.640295	0.033341
20352	Sema4b	2.88879	1.24365	0.430509	2.36796	0.0197545		117198	Ivns1abp	-2.4947	-1.45304	0.582451	0.365252	0.033341
56741	Nope	2.88833	1.44697	0.500971	2.72634	0.0197545		229599	Gm129	-2.49291	-1.0044	0.402902	0.498478	0.033341
15531	Ndst1	2.88472	1.23411	0.427808	2.35236	0.0197545		241950	Bbs12	-2.4907	-0.69056	0.277254	0.619614	0.033341
66552	2010106G01Rik	2.88407	0.931647	0.323032	1.90745	0.0197545		69195	Tmem121	-2.4899	-0.88622	0.355925	0.541031	0.033341
15512	Hspa2	2.88125	1.20002	0.416495	2.29744	0.0197545		69539	2300002D11Rik	-2.48441	-0.87175	0.350887	0.546485	0.033341
213027	B130050I23Rik	2.88	1.16796	0.405542	2.24694	0.0197545		68705	Gtf2f2	-2.48378	-0.77163	0.310667	0.585756	0.033341
68563	Dpm3	2.87676	0.943256	0.327888	1.92286	0.0197545		24060	Slc35a1	-2.48342	-0.85862	0.345743	0.551478	0.033341
230809	Pdik1l	2.87618	1.13177	0.393496	2.19127	0.0197545		225579	Slc27a6	-2.48005	-0.82231	0.331571	0.565534	0.033341
230257	Rod1	2.8731	1.01061	0.351748	2.01476	0.0197545		328162	6720458F09Rik	-2.47785	-0.79688	0.321602	0.575592	0.033341
244058	Rgma	2.87172	1.49954	0.522175	2.82753	0.0197545		319278	A230050P20Rik	-2.47537	-1.02196	0.412854	0.492445	0.033341
68539	Tmem109	2.86925	0.818562	0.285287	1.76365	0.0197545		18986	Pou2f1	-2.47479	-0.64826	0.261944	0.638051	0.033341
114715	Spred1	2.86725	1.18078	0.411814	2.26699	0.0197545		104184	Blmh	-2.47204	-0.65144	0.263521	0.636647	0.033341
66085	Eif3f	2.86192	0.934678	0.326592	1.91146	0.0197545		23917	Impdh1	-2.46786	-0.85693	0.347235	0.552127	0.033341
68219	Nudt21	2.86141	1.30423	0.455801	2.46953	0.0197545		67065	Polr3d	-2.46637	-0.82513	0.334552	0.564432	0.033341
19212	Pter	2.8598	0.827412	0.289325	1.7745	0.0197545		71116	Stx18	-2.46299	-1.03762	0.421283	0.487132	0.033341
16648	Kpna3	2.85743	1.26724	0.443488	2.407	0.0197545		18201	Nsmaf	-2.46261	-1.04583	0.424684	0.484366	0.033341
68375	Ndufa8	2.85669	1.18723	0.415596	2.27715	0.0197545		54397	Ppt2	-2.46249	-0.6559	0.266357	0.634679	0.033341
20955	Sybl1	2.8554	0.835154	0.292482	1.78405	0.0197545		18641	Pfkl	-2.46197	-0.76151	0.309309	0.589879	0.033341
22445	Xlr3a	2.8545	1.21934	0.427165	2.32841	0.0197545		17975	Ncl	-2.45999	-0.88036	0.357869	0.543234	0.033341
216164	Dos	2.85065	0.915831	0.321272	1.88666	0.0197545		100929	Tyw1	-2.45855	-0.92347	0.375616	0.527239	0.033341
57342	Parva	2.85012	1.15893	0.406626	2.23292	0.0197545		21975	Top3a	-2.45833	-0.86674	0.352573	0.548384	0.033341
214290	Zcchc6	2.84955	0.892877	0.31334	1.85688	0.0197545		12455	Ccnt1	-2.45711	-0.81983	0.333657	0.566508	0.033341
20617	Snca	2.84787	1.62838	0.57179	3.09167	0.0197545		20499	Slc12a7	-2.45551	-0.8009	0.326163	0.573992	0.033341
64213	St7	2.84775	1.25117	0.439352	2.38034	0.0197545		64934	Pes1	-2.45537	-0.69595	0.283441	0.617302	0.033341
230316	Megf9	2.84648	1.32907	0.466918	2.51241	0.0197545		101861	Ints4	-2.45106	-0.67346	0.274764	0.627	0.033341
213541	Ythdf2	2.84516	1.12464	0.395283	2.18047	0.0197545		53893	Nudt5	-2.451	-0.70953	0.289487	0.611518	0.033341
30927	Snai3	2.84308	1.8321	0.644407	3.56055	0.0197545		28042	D5Wsu178e	-2.45013	-0.70556	0.287969	0.613204	0.033341
52323	Klhl7	2.8424	0.916656	0.322494	1.88774	0.0197545		54613	St3gal6	-2.44981	-1.03031	0.420568	0.489604	0.033341
232236	C130022K22Rik	2.841	0.748552	0.263482	1.68011	0.0197545		57773	Wdr4	-2.44727	-0.94934	0.387917	0.51787	0.033341
20042	Rps12	2.84077	1.16786	0.411108	2.24678	0.0197545		67390	Rnmtl1	-2.44637	-0.94657	0.386927	0.518866	0.033341
53621	Cnot4	2.84035	0.967999	0.340802	1.95613	0.0197545		58180	Hic2	-2.44299	-0.90901	0.37209	0.532549	0.033341
12033	Bcap29	2.83825	1.11211	0.391828	2.16161	0.0197545		77407	Rab35	-2.44121	-0.7147	0.292763	0.609334	0.033341
319159	Hist1h4j	2.83335	1.06715	0.37664	2.09529	0.0197545		68477	Rmnd5a	-2.43894	-0.92312	0.378494	0.527366	0.033341
56275	Rbm14	2.82575	1.70895	0.604776	3.26922	0.0197545		28109	D10Wsu102e	-2.43806	-0.68256	0.279959	0.623059	0.033341
171508	Creld1	2.82488	0.976479	0.345671	1.96766	0.0197545		14083	Ptk2	-2.43185	-0.64895	0.266855	0.637744	0.033341
53619	Blcap	2.8244	0.96316	0.341014	1.94958	0.0197545		97998	Depdc6	-2.42794	-1.30711	0.538361	0.40413	0.033341
22064	Trpc2	2.82174	0.95321	0.33781	1.93618	0.0197545		70024	Mcm10	-2.4279	-1.13956	0.469361	0.453898	0.033341
381990	Zbtb2	2.81971	2.30981	0.819166	4.95818	0.0197545		72155	Cenpn	-2.42752	-1.07997	0.444887	0.473038	0.033341
74043	Pex26	2.81838	0.894571	0.317406	1.85906	0.0197545		239706	BC024814	-2.42566	-0.73896	0.304644	0.59917	0.033341
232023	AW146242	2.81574	1.22718	0.435828	2.34109	0.0197545		68048	Isg20l1	-2.42398	-0.71318	0.29422	0.609972	0.033341
235461	B230380D07Rik	2.81229	1.52305	0.54157	2.87399	0.0197545		16418	Eif6	-2.42375	-0.76162	0.31423	0.589836	0.033341
103841	Cuedc1	2.81182	1.26315	0.449229	2.4002	0.0197545		243834	Zfp324	-2.42363	-0.65183	0.268949	0.636471	0.033341
17938	Naca	2.81133	1.26637	0.450451	2.40555	0.0197545		56390	Sssca1	-2.42227	-0.79636	0.328766	0.575801	0.033341
76846	Rps9	2.8104	1.00494	0.357578	2.00685	0.0197545		23970	Pacsin2	-2.42198	-0.81387	0.336033	0.568855	0.033341
68836	Mrpl52	2.8086	0.897307	0.319485	1.86259	0.0197545		14911	Thumpd3	-2.42052	-0.72275	0.298593	0.605941	0.033341
93684	2011-09-15	2.80802	1.5797	0.562568	2.98909	0.0197545		19125	Prodh	-2.41235	-0.90305	0.374346	0.534755	0.033341
12499	Entpd5	2.80507	0.791571	0.282193	1.73096	0.0197545		18440	P2rxl1	-2.41084	-0.64478	0.267451	0.63959	0.033341
71846	Syce2	2.80465	1.2296	0.438414	2.34502	0.0197545		108912	Cdca2	-2.4092	-0.72734	0.301899	0.604018	0.033341
19075	Prim1	2.80382	0.872278	0.311104	1.83055	0.0197545		19341	Rab4a	-2.40819	-0.9471	0.393282	0.518675	0.033341
66270	1810015C04Rik	2.80378	1.07185	0.382288	2.10213	0.0197545		234734	Aars	-2.40416	-1.16552	0.484793	0.445804	0.033341
229615	Pias3	2.80053	0.771912	0.27563	1.70753	0.0197545		117150	Pip4k2c	-2.40361	-0.66244	0.275605	0.631807	0.033341
100340	Smpdl3b	2.80018	1.2701	0.453579	2.41178	0.0197545		21453	Tcof1	-2.40322	-0.6813	0.283494	0.623604	0.033341
230075	Ndufb6	2.79358	1.10842	0.396776	2.1561	0.0197545		18452	P4ha2	-2.40153	-0.85755	0.357085	0.551889	0.033341
67128	Ube2g1	2.79245	0.785307	0.281225	1.72346	0.0197545		16551	Kif11	-2.39916	-0.95789	0.399258	0.514811	0.033341
218214	Aof1	2.78305	1.0195	0.366323	2.02721	0.0197545		21390	Tbxa2r	-2.39879	-0.71001	0.295987	0.611316	0.033341
14708	Gng7	2.78113	0.980592	0.352587	1.97327	0.0197545		98404	AI597479	-2.39864	-0.75901	0.316434	0.590902	0.033341
20450	St8sia2	2.7806	1.17226	0.421588	2.25365	0.0197545		74167	Nudt9	-2.39808	-0.67075	0.279705	0.628178	0.033341
12167	Bmpr1b	2.77612	1.20893	0.435474	2.31166	0.0197545		70508	Bbx	-2.39722	-0.69458	0.289743	0.61789	0.033341
18640	Pfkfb2	2.77289	1.37351	0.495334	2.591	0.0197545		70383	Cox10	-2.39499	-0.67127	0.280281	0.627954	0.033341
330695	Ctxn1	2.77129	1.05183	0.379546	2.07316	0.0197545		319504	Nrcam	-2.39361	-1.347	0.562746	0.393109	0.033341
69790	Med30	2.7695	0.938919	0.339022	1.91709	0.0197545		71844	Nupl1	-2.38931	-0.81373	0.340571	0.568909	0.033341
19302	Pxmp3	2.769	0.795925	0.287441	1.73619	0.0197545		109674	Ampd2	-2.38868	-0.97274	0.40723	0.509536	0.033341
55934	rp9	2.76742	0.869475	0.314183	1.827	0.0197545		97484	Cog8	-2.38748	-0.72487	0.303614	0.60505	0.033341
14664	Slc6a9	2.76481	1.22131	0.441735	2.33159	0.0197545		63872	Zfp296	-2.38721	-0.78986	0.330873	0.578399	0.033341
19744	Rheb	2.76348	0.858663	0.310718	1.81336	0.0197545		105844	Card10	-2.38619	-1.52169	0.637707	0.348278	0.033341
68917	Hint2	2.76287	1.04915	0.379733	2.06931	0.0197545		20516	Slc20a2	-2.38368	-0.65105	0.273127	0.636818	0.033341
67043	Syap1	2.76184	0.968093	0.350524	1.95625	0.0197545		64138	Ctsz	-2.38354	-0.89927	0.377282	0.53616	0.033341
328110	Prpf39	2.75721	0.891046	0.32317	1.85452	0.0197545		14200	Fhl2	-2.38214	-1.24865	0.524169	0.420843	0.033341
56364	Zmym3	2.75718	1.09042	0.395486	2.12937	0.0197545		18618	Pemt	-2.3812	-0.82865	0.347996	0.563057	0.033341
67068	Dynlrb1	2.75394	1.00119	0.36355	2.00165	0.0197545		19092	Prkg2	-2.38013	-0.89297	0.375178	0.538503	0.033341
12550	Cdh1	2.75291	0.862508	0.313308	1.8182	0.0197545		107522	Ece2	-2.37841	-0.75485	0.317375	0.592609	0.033341
227835	Gtdc1	2.75254	0.696045	0.252874	1.62006	0.0197545		70044	Tut1	-2.3769	-0.60131	0.25298	0.659156	0.033341
69802	Cox11	2.75142	0.999908	0.363415	1.99987	0.0197545		104416	Bap1	-2.37584	-0.61882	0.260463	0.651205	0.033341
72607	Usp13	2.75092	0.890461	0.323696	1.85377	0.0197545		14537	Gcnt1	-2.37577	-1.26783	0.533647	0.415285	0.033341
66410	Mterfd1	2.75048	0.773477	0.281215	1.70938	0.0197545		53419	Corin	-2.3746	-1.21706	0.512533	0.430158	0.033341
14314	Fstl1	2.75048	1.11772	0.406373	2.17004	0.0197545		77938	A930008G19Rik	-2.37403	-0.7385	0.311075	0.599362	0.033341
59056	Evc	2.74912	0.930169	0.338351	1.9055	0.0197545		71919	Rpap3	-2.37263	-0.95703	0.403361	0.515118	0.033341
270096	Mon1b	2.74876	0.785256	0.285677	1.7234	0.0197545		15394	Hoxa1	-2.37234	-1.0086	0.425152	0.497027	0.033341
66845	Mrpl33	2.74769	1.1312	0.411689	2.1904	0.0197545		22629	Ywhah	-2.37209	-0.65206	0.274891	0.636369	0.033341
12608	Cebpb	2.74631	2.00104	0.728629	4.00289	0.0197545		74204	Xpo6	-2.36906	-0.66781	0.28189	0.62946	0.033341
213990	Centg3	2.74588	0.893344	0.32534	1.85748	0.0197545		19089	Prkcsh	-2.36728	-0.55286	0.233541	0.681668	0.033341
73724	Mcee	2.74571	0.866499	0.315583	1.82323	0.0197545		381306	BC055324	-2.36451	-0.84976	0.359381	0.554878	0.033341
109672	Cyb5	2.74395	1.21959	0.444467	2.32881	0.0197545		544922		-2.36449	-0.83719	0.354069	0.559731	0.033341
27364	Srr	2.74115	1.01993	0.372082	2.02782	0.0197545		16351	Ipp	-2.36364	-0.67967	0.28755	0.62431	0.033341
104570	Smek2	2.74057	0.972093	0.354704	1.96168	0.0197545		19076	Prim2	-2.36162	-0.77705	0.329033	0.583558	0.033341
68839	Ankrd46	2.73889	0.901229	0.329049	1.86766	0.0197545		71354	Wdr31	-2.36119	-0.92776	0.39292	0.525674	0.033341
380629	Heca	2.73839	0.855631	0.312458	1.80955	0.0197545		69528	1700030J22Rik	-2.35945	-0.68888	0.291967	0.620336	0.033341
19339	Rab3a	2.73502	0.905207	0.330969	1.87281	0.0197545		217692	Sipa1l1	-2.35882	-0.93052	0.394486	0.524668	0.033341
68501	Nsmce2	2.73313	0.996692	0.36467	1.99542	0.0197545		114896	Afg3l1	-2.35542	-0.68282	0.289892	0.622947	0.033341
67249	Tbc1d19	2.73181	0.808189	0.295844	1.75101	0.0197545		12070	Ngfrap1	-2.35147	-0.93298	0.396765	0.523775	0.033341
98828	Cdc123	2.73128	0.917862	0.336056	1.88931	0.0197545		68275	Rpa1	-2.35076	-0.75968	0.323165	0.590627	0.033341
16423	Cd47	2.73019	0.88968	0.325868	1.85276	0.0197545		252870	Usp7	-2.34971	-1.24077	0.528051	0.423147	0.033341
66309	Tmem128	2.72954	0.874865	0.320517	1.83384	0.0197545		100206	Adprhl2	-2.34928	-0.7452	0.317203	0.596585	0.033341
58805	Mlxipl	2.72355	0.83656	0.307158	1.78579	0.0197545		75826	Senp2	-2.34736	-0.63415	0.270153	0.644321	0.033341
11844	Arf5	2.72267	2.47223	0.908018	5.54901	0.0197545		212555	Pqlc2	-2.34647	-0.64498	0.274874	0.6395	0.033341
103768	Tubg2	2.71945	1.09636	0.403157	2.13815	0.0197545		19179	Psmc1	-2.34442	-0.74763	0.318899	0.595579	0.033341
66413	Psmd6	2.71755	1.23408	0.454113	2.35231	0.0197545		72170	Chchd4	-2.34311	-0.905	0.38624	0.534032	0.033341
66421	2410004B18Rik	2.71675	1.20501	0.44355	2.30539	0.0197545		69663	Ddx51	-2.34199	-0.67269	0.287232	0.627334	0.033341
67115	Rpl14	2.71386	1.15548	0.425771	2.22759	0.0197545		232370	Clstn3	-2.34167	-0.9542	0.407484	0.516129	0.033341
93757	Immp2l	2.71374	0.824579	0.303853	1.77102	0.0197545		68988	Prpf31	-2.34115	-0.71655	0.306067	0.608552	0.033341
22661	Zfp148	2.70766	0.864828	0.319401	1.82112	0.0197545		74157	1300018I05Rik	-2.33929	-0.55357	0.23664	0.681332	0.033341
65113	Ndfip1	2.70641	1.41004	0.521002	2.65745	0.0197545		75659	Wdr54	-2.33909	-0.91213	0.38995	0.531401	0.033341
67383	2410127L17Rik	2.7039	1.1183	0.413586	2.17091	0.0197545		52793	ORF9	-2.33866	-0.73296	0.313411	0.601668	0.033341
21416	Tcf7l2	2.6997	1.01513	0.376017	2.02109	0.0197545		381085	Tbc1d22b	-2.33849	-0.71033	0.303755	0.611182	0.033341
57319	Smpdl3a	2.69831	1.22311	0.453286	2.33449	0.0197545		66994	1500031L02Rik	-2.33834	-0.63699	0.272409	0.643055	0.033341
12010	B2m	2.69729	0.86343	0.32011	1.81936	0.0197545		107765	Ankrd1	-2.33728	-1.00131	0.42841	0.499545	0.033341
68758	Abhd11	2.69687	0.965436	0.357984	1.95265	0.0197545		18746	Pkm2	-2.33722	-0.82686	0.35378	0.563754	0.033341
72747	2810439F02Rik	2.69307	0.819496	0.304298	1.76479	0.0197545		228858	Gdap1l1	-2.33698	-0.8865	0.379335	0.540925	0.033341
29816	Hip1r	2.69049	0.830088	0.308527	1.77779	0.0197545		56384	Letm1	-2.33649	-0.72726	0.311262	0.60405	0.033341
230073	Ddx58	2.68959	0.938277	0.348856	1.91624	0.0197545		11765	Ap1g1	-2.33645	-0.69363	0.296872	0.618297	0.033341
15528	Hspe1	2.68723	1.15204	0.428711	2.22228	0.0197545		72982	Tmem138	-2.3341	-0.72674	0.31136	0.604266	0.033341
66603	Sip1	2.68687	0.887137	0.330175	1.8495	0.0197545		20512	Slc1a3	-2.33402	-1.27949	0.548192	0.411942	0.033341
65106	Arl6ip5	2.68514	1.36832	0.509591	2.5817	0.0197545		12340	Capza1	-2.33032	-1.18672	0.509252	0.439301	0.033341
27361	Sepx1	2.68474	0.944919	0.35196	1.92508	0.0197545		54326	Elovl2	-2.32959	-0.83585	0.358796	0.560254	0.033341
56048	Lgals8	2.68443	1.21583	0.452919	2.32274	0.0197545		14534	Gcn5l2	-2.32248	-1.00039	0.430744	0.499864	0.033341
107260	Otub1	2.68311	0.862472	0.321445	1.81815	0.0197545		76251	0610007P08Rik	-2.3223	-1.06239	0.457473	0.478838	0.033341
67681	Mrpl18	2.68301	1.11174	0.414364	2.16106	0.0197545		78177	4930519N13Rik	-2.31888	-0.82024	0.353723	0.566347	0.033341
227615	C730025P13Rik	2.68222	1.29411	0.482478	2.45226	0.0197545		27428	Shroom3	-2.31731	-0.83062	0.358443	0.562287	0.033341
66043	Atp5d	2.68069	0.838666	0.312855	1.7884	0.0197545		69185	Dtwd1	-2.3168	-0.64794	0.279671	0.638189	0.033341
76787	Ppfia3	2.67763	1.06168	0.396501	2.08736	0.0197545		231863	Fbxl18	-2.3141	-1.13875	0.492092	0.454153	0.033341
21915	Dtymk	2.66885	1.84319	0.690629	3.58802	0.0197545		71986	Ddx28	-2.31124	-0.81351	0.351979	0.568996	0.033341
66174	Nudt14	2.66808	0.918256	0.344164	1.88983	0.0197545		17865	Mybl2	-2.31035	-0.77805	0.336767	0.583155	0.033341
66209	1110054O05Rik	2.66706	1.02809	0.385478	2.03933	0.0197545		56401	Lepre1	-2.30713	-1.10594	0.479357	0.4646	0.033341
22343	Lin7c	2.66546	1.27044	0.476631	2.41235	0.0197545		234729	Vac14	-2.30661	-0.69949	0.303254	0.615791	0.033341
13056	Cyb561	2.66274	1.31325	0.493195	2.48501	0.0197545		30963	Ptpla	-2.30606	-0.66043	0.28639	0.632689	0.033341
19946	Rpl30	2.66272	1.42746	0.53609	2.68972	0.0197545		240396	Mex3c	-2.30575	-1.28734	0.558317	0.409705	0.033341
22318	Vamp2	2.65726	0.839902	0.316078	1.78993	0.0197545		20480	Clpb	-2.30575	-0.7289	0.316124	0.603362	0.033341
192196	Luc7l2	2.65721	0.950463	0.357692	1.93249	0.0197545		22367	Vrk1	-2.30437	-0.69031	0.299567	0.619719	0.033341
432637		2.65655	0.769568	0.289687	1.70476	0.0197545		57377	Gcs1	-2.3027	-0.74828	0.324959	0.595311	0.033341
13048	Cutl2	2.65652	0.920586	0.346539	1.89288	0.0197545		11846	Arg1	-2.30034	-2.26384	0.984133	0.208218	0.033341
80877	Lrba	2.65445	0.994569	0.374679	1.99249	0.0197545		12212	Chic1	-2.30002	-0.89997	0.391287	0.535898	0.033341
17874	Myd88	2.65184	0.95982	0.361944	1.94507	0.0197545		69903	Rasip1	-2.29985	-0.92108	0.400493	0.528115	0.033341
17349	Mlf1	2.64812	1.01402	0.382921	2.01953	0.0197545		228994	Ythdf1	-2.29923	-0.74437	0.323747	0.596928	0.033341
21672	Prdx2	2.64423	0.707513	0.267569	1.63299	0.0197545		20977	Syp	-2.29786	-0.73093	0.31809	0.602516	0.033341
52690	Setd3	2.64302	0.872592	0.33015	1.83095	0.0197545		230996	9430015G10Rik	-2.29606	-0.61894	0.269567	0.651149	0.033341
18551	Pcsk4	2.64208	0.927346	0.350991	1.90177	0.0197545		212163	8030462N17Rik	-2.29541	-0.77211	0.336373	0.585559	0.033341
70122	Mllt3	2.6391	0.915688	0.34697	1.88647	0.0197545		331026	Gmppb	-2.29453	-0.86804	0.378309	0.547891	0.033341
67876	Coq10b	2.63788	0.906574	0.343676	1.87459	0.0197545		13619	Phc1	-2.29348	-0.751	0.327449	0.594193	0.033341
14615	Gja7	2.63784	0.952256	0.360998	1.9349	0.0197545		26561	Mmp23	-2.29127	-0.9815	0.428366	0.506452	0.033341
67089	Psmc6	2.63684	1.10734	0.41995	2.15448	0.0197545		231832	Tmem184a	-2.2912	-0.60382	0.263536	0.658012	0.033341
239368	BC030476	2.6356	1.59081	0.603585	3.01218	0.0197545		110821	Pcca	-2.29112	-0.84344	0.368136	0.557312	0.033341
66661	Srp72	2.63133	0.986731	0.374992	1.98169	0.0197545		212390	Klhl32	-2.29017	-0.80965	0.353533	0.570519	0.033341
319172	Hist1h2ab	2.63099	1.16674	0.443458	2.24503	0.0197545		67842	2610027L16Rik	-2.28789	-0.85156	0.372202	0.554186	0.033341
12616	Cenpb	2.6288	0.96905	0.368628	1.95755	0.0197545		215690	Nav1	-2.28458	-0.8957	0.392062	0.537488	0.033341
245945	BC013481	2.62821	1.16252	0.442323	2.23847	0.0197545		63958	Ube4b	-2.28111	-0.7526	0.329926	0.593534	0.033341
114641	Rpl31	2.62672	0.973174	0.37049	1.96315	0.0197545		76454	Fbxo31	-2.2787	-0.56536	0.248107	0.675785	0.033341
56248	Ak3	2.62669	0.941813	0.358555	1.92094	0.0197545		107435	Hat1	-2.27576	-0.77176	0.33912	0.585704	0.033341
68734	Smek1	2.62666	0.874868	0.333072	1.83384	0.0197545		69554	Klhdc2	-2.27408	-0.68973	0.303299	0.619971	0.033341
70612	5730494N06Rik	2.62548	0.853672	0.325148	1.80709	0.0197545		56532	Ripk3	-2.27204	-0.74735	0.328933	0.595696	0.033341
56043	Akr1e1	2.6252	0.863029	0.328748	1.81885	0.0197545		17279	Melk	-2.27151	-0.86396	0.380346	0.549442	0.033341
71885	2310003H01Rik	2.6233	0.782117	0.298142	1.71965	0.0197545		18719	Pip5k1b	-2.2714	-0.82222	0.361988	0.565571	0.033341
51788	H2afz	2.6225	1.4378	0.548255	2.70907	0.0197545		67949	Mki67ip	-2.27138	-0.65678	0.289156	0.634291	0.033341
12750	Clk4	2.62217	0.870428	0.33195	1.82821	0.0197545		14391	Gabpb1	-2.26809	-1.0301	0.454173	0.489675	0.033341
74347	4632415K11Rik	2.61809	0.918449	0.350808	1.89008	0.0197545		99696	Ankrd50	-2.26683	-0.80912	0.356938	0.570731	0.033341
26415	Mapk13	2.61716	1.12549	0.430042	2.18176	0.0197545		229521	Syt11	-2.26378	-1.21107	0.534977	0.431948	0.033341
26428	Orc4l	2.61666	0.735135	0.280944	1.66455	0.0197545		18741	Pitx2	-2.25975	-1.32179	0.584928	0.400038	0.033341
14007	Cugbp2	2.61619	1.24994	0.477773	2.37832	0.0197545		338354	Zfp780b	-2.25933	-0.80623	0.356845	0.571873	0.033341
170748	BC017612	2.61536	0.879558	0.336304	1.83981	0.0197545		269152	Kif26b	-2.25532	-1.01015	0.447895	0.496496	0.033341
27050	Rps3	2.61527	1.10747	0.423463	2.15468	0.0197545		26965	Cul1	-2.25406	-0.62833	0.278756	0.646923	0.033341
330662	Dock1	2.61491	0.912075	0.348798	1.88175	0.0197545		73212	3110082I17Rik	-2.25244	-0.95281	0.423013	0.516625	0.033341
13710	Elf3	2.61048	1.0073	0.385869	2.01015	0.0197545		13449	Dok2	-2.25086	-0.59084	0.262495	0.663956	0.033341
13003	Vcan	2.60872	1.198	0.459228	2.29421	0.0197545		22701	Zfp41	-2.25043	-0.63238	0.281002	0.645113	0.033341
66935	1700023B02Rik	2.60862	1.0065	0.385837	2.00903	0.0197545		52850	Sgsm1	-2.24892	-1.14309	0.508285	0.452788	0.033341
104303	Arl1	2.60587	0.699365	0.268381	1.62379	0.0197545		140917	Dclre1b	-2.24876	-0.70886	0.315223	0.611803	0.033341
26879	B3galnt1	2.60531	1.43144	0.549431	2.69716	0.0197545		13495	Drg2	-2.24832	-0.57572	0.256066	0.670952	0.033341
192195	Ash1l	2.6042	0.949898	0.364756	1.93174	0.0197545		217449	Ttc15	-2.24792	-0.61272	0.272573	0.653962	0.033341
15461	Hras1	2.60243	0.871264	0.334789	1.82926	0.0197545		26943	Serinc3	-2.2463	-0.55466	0.246922	0.680818	0.033341
26914	H2afy	2.60039	0.932341	0.358539	1.90837	0.0197545		100608	Noc4l	-2.24628	-0.69304	0.308529	0.618548	0.033341
110323	Cox6b1	2.59978	1.03691	0.398847	2.05183	0.0197545		66214	1190002H23Rik	-2.24508	-0.63	0.280611	0.646179	0.033341
214917	BC008155	2.59939	0.852472	0.32795	1.80559	0.0197545		72238	Tbc1d5	-2.24324	-0.76482	0.340945	0.588527	0.033341
434204	Whdc1	2.59887	0.851191	0.327523	1.80399	0.0197545		66523	2810004N23Rik	-2.24022	-1.25859	0.561816	0.417952	0.033341
57294	Rps27	2.59564	1.02308	0.394154	2.03226	0.0197545		170625	Snag1	-2.24007	-0.69923	0.312146	0.6159	0.033341
59038	Pxmp4	2.59495	0.701446	0.270312	1.62613	0.0197545		240660	Tmem20	-2.23792	-0.62662	0.280002	0.647692	0.033341
68379	Ciz1	2.59257	0.987691	0.380969	1.98301	0.0197545		108989	Tpr	-2.23642	-0.85775	0.383537	0.551813	0.033341
108148	Galnt2	2.59031	0.655975	0.253242	1.57568	0.0197545		94223	Dgcr8	-2.23523	-0.59653	0.266878	0.661341	0.033341
30057	Timm8b	2.58851	1.07692	0.416037	2.10952	0.0197545		242362	Manea	-2.23438	-1.03068	0.461282	0.48948	0.033341
228602	4930402H24Rik	2.58655	1.02303	0.39552	2.03219	0.0197545		24117	Wif1	-2.23112	-0.89472	0.40102	0.53785	0.033341
236604		2.58548	0.845836	0.327148	1.79731	0.0197545		260305	Nphp4	-2.23012	-0.65506	0.293733	0.635049	0.033341
20068	Rps17	2.58445	0.946137	0.366088	1.92671	0.0197545		14673	Gna12	-2.22973	-1.10997	0.497807	0.463303	0.033341
20842	Stag1	2.58281	0.728401	0.282019	1.6568	0.0197545		12532	Cdc25c	-2.22865	-0.83209	0.373362	0.561714	0.033341
217124	Ppp1r9b	2.58081	0.759506	0.294289	1.69291	0.0197545		76737	Creld2	-2.22696	-0.8582	0.385368	0.551641	0.033341
66377	Ndufc1	2.5768	0.828795	0.321637	1.7762	0.0197545		107071	Wdr74	-2.22532	-0.80559	0.362009	0.572129	0.033341
13193	Dcx	2.57176	1.74861	0.679929	3.36035	0.0197545		14365	Fzd3	-2.22433	-0.7594	0.341407	0.590741	0.033341
56520	Nme4	2.56627	0.903327	0.352001	1.87037	0.0197545		22158	Tulp3	-2.22425	-1.05024	0.47218	0.482886	0.033341
268449	Rpl23a	2.56453	0.920826	0.359062	1.8932	0.0197545		264064	Cdk8	-2.22109	-0.72492	0.326382	0.605029	0.033341
69085	Zcchc9	2.56298	0.993483	0.387628	1.99099	0.0197545		72322	Xpo5	-2.22075	-0.64087	0.288584	0.641325	0.033341
320262	A830073O21Rik	2.56292	0.788142	0.307518	1.72685	0.0197545		215387	Ncaph	-2.22028	-0.58027	0.26135	0.668839	0.033341
67893	Tmem86a	2.56225	0.788725	0.307825	1.72755	0.0197545		223646	Naprt1	-2.21835	-1.04236	0.469881	0.485533	0.033341
15980	Ifngr2	2.56126	1.00127	0.39093	2.00176	0.0197545		26972	Spo11	-2.21626	-0.84805	0.38265	0.555535	0.033341
240084	Cchcr1	2.56068	0.696996	0.272192	1.62113	0.0197545		80283	Abtb1	-2.21373	-0.63197	0.285478	0.645294	0.033341
234463	Tmem34	2.55781	0.919308	0.359412	1.89121	0.0197545		13426	Dync1i1	-2.21223	-0.92231	0.416913	0.527664	0.033341
103266	AI597468	2.55757	0.707291	0.276548	1.63274	0.0197545		241274	Pnpla7	-2.21185	-0.63774	0.288328	0.642721	0.033341
67861	2310005E10Rik	2.55618	0.858934	0.336023	1.8137	0.0197545		11758	Prdx6	-2.21134	-0.8827	0.399171	0.54235	0.033341
20969	Sdc1	2.55376	0.686155	0.268684	1.60899	0.0197545		57370	B4galt3	-2.21102	-0.67246	0.30414	0.627437	0.033341
21981	Ppp1r13b	2.55265	1.41577	0.554627	2.66802	0.0197545		20227	Sart1	-2.20891	-0.84371	0.381956	0.55721	0.033341
12173	Bnc1	2.5513	1.09667	0.429849	2.13861	0.0197545		320923	Mtap7d3	-2.20422	-1.03493	0.46952	0.48804	0.033341
26922	Mecr	2.55076	0.897925	0.352022	1.86338	0.0197545		12752	Cln3	-2.20366	-1.05547	0.478961	0.481141	0.033341
544988	LOC544988	2.55061	1.55964	0.611477	2.9478	0.0197545		17330	Minpp1	-2.20126	-0.77695	0.35296	0.583597	0.033341
66384	Srp19	2.54829	0.887097	0.348115	1.84945	0.0197545		72323	Asb6	-2.20094	-0.63645	0.289171	0.643294	0.033341
13167	Dbi	2.54689	1.11469	0.437665	2.16548	0.0197545		27967	Cherp	-2.19929	-0.63819	0.29018	0.642519	0.033341
102103	Mtus1	2.54587	1.25308	0.492202	2.3835	0.0197545		57905	Isy1	-2.19743	-0.76047	0.346075	0.590302	0.033341
67306	3110050N22Rik	2.54366	0.889936	0.349865	1.85309	0.0197545		102657	Cd276	-2.19605	-0.66837	0.304352	0.629216	0.033341
230784	Sesn2	2.53981	0.922077	0.363049	1.89484	0.0197545		216820	Dhrs7b	-2.19472	-0.71719	0.326778	0.608283	0.033341
80744	BC003993	2.5389	1.24621	0.490847	2.37218	0.0197545		18605	Enpp1	-2.19253	-1.4057	0.64113	0.377436	0.033341
242705	E2f2	2.53795	0.780253	0.307434	1.71743	0.0197545		224045	Eif2b5	-2.1921	-0.52095	0.237648	0.696914	0.033341
18701	Pigf	2.53709	1.07678	0.424416	2.10932	0.0197545		16456	F11r	-2.18968	-1.06168	0.484858	0.479073	0.033341
66818	9130011J15Rik	2.53557	0.727166	0.286787	1.65538	0.0197545		406217	Bex4	-2.18961	-1.01987	0.465779	0.49316	0.033341
66885	Acadsb	2.53414	1.14896	0.453395	2.21755	0.0197545		18195	Nsf	-2.18961	-0.80523	0.36775	0.572272	0.033341
231214	5730509K17Rik	2.53184	1.02966	0.406685	2.04154	0.0197545		73699	Ppp2r1b	-2.18779	-1.36548	0.624134	0.388107	0.033341
19943	Rpl28	2.52936	0.788248	0.311639	1.72698	0.0197545		56533	Rgs17	-2.18666	-0.97983	0.448095	0.507038	0.033341
71911	Bdh1	2.52166	1.07198	0.42511	2.10232	0.0197545		16574	Kif5c	-2.18576	-0.77732	0.355627	0.583451	0.033341
240034	Zfp760	2.52118	0.940856	0.373181	1.91967	0.0197545		219114	F630043A04Rik	-2.1846	-0.74213	0.339712	0.597854	0.033341
67005	Polr3k	2.5205	0.746678	0.296242	1.67792	0.0197545		170763	Zfp87	-2.18402	-0.83807	0.383728	0.559391	0.033341
76890	Memo1	2.51987	1.03924	0.412416	2.05514	0.0197545		78798	Eml4	-2.18308	-0.67572	0.309529	0.626018	0.033341
13211	Dhx9	2.51805	0.941721	0.373988	1.92082	0.0197545		241593	OTTMUSG00000014964	-2.18109	-0.84902	0.389266	0.555161	0.033341
17463	Psmd7	2.51792	0.920491	0.365576	1.89276	0.0197545		12466	Cct6a	-2.17936	-0.67798	0.311092	0.625039	0.033341
16002	Igf2	2.51338	0.897357	0.357032	1.86265	0.0197545		17420	Mnat1	-2.17915	-0.80517	0.369489	0.572295	0.033341
15375	Foxa1	2.50975	1.24943	0.497832	2.37748	0.0197545		66642	Ctnnbl1	-2.17902	-0.74055	0.339854	0.598511	0.033341
56213	Htra1	2.5096	1.03545	0.412594	2.04975	0.0197545		75613	Med25	-2.17802	-0.58819	0.270055	0.665179	0.033341
56350	Arl3	2.50949	1.00062	0.398736	2.00087	0.0197545		101831	C230052I12Rik	-2.17562	-0.65785	0.302375	0.633821	0.033341
67028	2610002M06Rik	2.50879	1.03592	0.412918	2.05043	0.0197545		12895	Cpt1b	-2.17416	-0.61854	0.284497	0.651329	0.033341
20907	Stx1a	2.50779	0.732892	0.292246	1.66197	0.0197545		56449	Csda	-2.1729	-0.57134	0.262941	0.672989	0.033341
66914	Vps28	2.50707	0.742139	0.296019	1.67265	0.0197545		22321	Vars	-2.17111	-0.66237	0.305085	0.631839	0.033341
104112	Acly	2.50665	0.56224	0.224299	1.47656	0.0197545		67236	2810452K22Rik	-2.16851	-0.84141	0.388015	0.558096	0.033341
50764	Fbxo15	2.50535	1.61121	0.643107	3.05508	0.0197545		19184	Psmc5	-2.16558	-0.75834	0.350179	0.591175	0.033341
12908	Crat	2.50279	1.29368	0.516895	2.45153	0.0197545		23993	Klk7	-2.16533	-0.83102	0.383784	0.562132	0.033341
105670	Rcbtb2	2.50275	0.661697	0.264388	1.58194	0.0197545		230376	6230416J20Rik	-2.16261	-0.63741	0.29474	0.642868	0.033341
17346	Mknk1	2.50234	0.884862	0.353614	1.84659	0.0197545		17354	Mllt10	-2.16251	-0.86703	0.400936	0.548276	0.033341
71538	Fbxo9	2.49784	0.863265	0.345604	1.81915	0.0286214		245847	Amdhd2	-2.16205	-0.61695	0.285356	0.652046	0.033341
13649	Egfr	2.49705	2.10414	0.842651	4.29941	0.0286214		12675	Chuk	-2.1614	-0.77588	0.358972	0.584032	0.033341
16993	Lta4h	2.49606	0.882239	0.353453	1.84323	0.0286214		321003	Xpnpep3	-2.16	-0.59231	0.274216	0.663281	0.037622
59012	Moxd1	2.49304	0.886608	0.355634	1.84882	0.0286214		100609	Nsun5	-2.15956	-0.60237	0.278931	0.658672	0.037622
57429	Sult5a1	2.49176	1.28689	0.516456	2.44001	0.0286214		210992	Aytl2	-2.15779	-0.90488	0.419354	0.534078	0.037622
13019	Ctf1	2.48998	0.746212	0.299686	1.67738	0.0286214		75291	Zbtb3	-2.15483	-0.66862	0.31029	0.629107	0.037622
12408	Cbr1	2.48955	0.852634	0.342485	1.80579	0.0286214		71934	Car13	-2.15292	-1.09576	0.508965	0.467889	0.037622
18176	Nras	2.48827	0.706594	0.28397	1.63195	0.0286214		277854	Depdc5	-2.14579	-0.66741	0.311035	0.629634	0.037622
268859	A2bp1	2.48675	1.07119	0.430758	2.10116	0.0286214		78658	Ncapd3	-2.14476	-0.58327	0.271951	0.667449	0.037622
19386	Ranbp2	2.4858	1.02623	0.412836	2.03669	0.0286214		223754	Tbc1d22a	-2.14241	-0.62818	0.293215	0.64699	0.037622
209011	Sirt7	2.48526	0.625849	0.251825	1.54312	0.0286214		12971	Crym	-2.14184	-0.9643	0.450218	0.512529	0.037622
66489	Rpl35	2.48211	0.813642	0.327802	1.75764	0.0286214		105988	Espl1	-2.14173	-0.59214	0.276478	0.663358	0.037622
58248	1700123O20Rik	2.48114	0.698456	0.281506	1.62277	0.0286214		98386	Lbr	-2.14083	-0.51887	0.242367	0.69792	0.037622
69660	Tmbim1	2.48058	1.0092	0.406838	2.01279	0.0286214		225207	Zfp521	-2.14007	-0.75842	0.35439	0.591143	0.037622
19186	Psme1	2.48058	0.865456	0.348893	1.82191	0.0286214		21953	Tnni2	-2.13893	-0.81648	0.381722	0.567826	0.037622
17189	Mb	2.47749	0.896119	0.361705	1.86105	0.0286214		214895	Lman2l	-2.13856	-0.70137	0.327963	0.614989	0.037622
68514	Efha1	2.47729	0.891532	0.359883	1.85515	0.0286214		22038	Plscr1	-2.13849	-0.87971	0.41137	0.543477	0.037622
74148	1300001I01Rik	2.47478	0.797354	0.322192	1.73791	0.0286214		228714	Csrp2bp	-2.13721	-0.73862	0.345602	0.599311	0.037622
101095	Zfp282	2.47302	0.7232	0.292436	1.65084	0.0286214		14287	Fpgs	-2.13646	-0.64111	0.300079	0.641221	0.037622
22755	Zfp93	2.47194	0.861218	0.348397	1.81657	0.0286214		64340	Dhx38	-2.13612	-0.72221	0.338096	0.606166	0.037622
269336	Ccdc32	2.47046	0.892145	0.361125	1.85593	0.0286214		75420	Secisbp2	-2.13585	-0.68904	0.322606	0.620267	0.037622
68195	Rnaset2b	2.46663	1.34862	0.546747	2.54669	0.0286214		16188	Il3ra	-2.13572	-0.65429	0.306357	0.635386	0.037622
52430	Echdc2	2.46661	0.835254	0.338624	1.78417	0.0286214		15228	Foxg1	-2.13503	-1.85282	0.867818	0.276851	0.037622
59048	C1galt1c1	2.46631	0.933972	0.378691	1.91053	0.0286214		245622	BC031748	-2.13447	-0.89209	0.417943	0.538834	0.037622
70257	2010107E04Rik	2.46555	0.938242	0.380541	1.91619	0.0286214		56422	Hbs1l	-2.13181	-0.68339	0.320569	0.622699	0.037622
18738	Pitpna	2.46425	0.713754	0.289643	1.64007	0.0286214		17777	Mttp	-2.13103	-0.78337	0.3676	0.581009	0.037622
28199	Wdr23	2.46238	0.719471	0.292185	1.64658	0.0286214		68166	Spire1	-2.13044	-0.89882	0.421893	0.536326	0.037622
18173	Slc11a1	2.46128	1.22666	0.498382	2.34024	0.0286214		217715	Eif2b2	-2.12969	-0.79614	0.373829	0.575887	0.037622
622404	RP23-195K8.6	2.46086	0.7338	0.298188	1.66301	0.0286214		105148	Iars	-2.12798	-0.68903	0.323795	0.620272	0.037622
71900	Tmem106b	2.45838	1.33726	0.543962	2.52671	0.0286214		66515	Cul7	-2.12618	-0.56753	0.266924	0.674772	0.037622
66226	Trappc2	2.45508	0.782301	0.318646	1.71987	0.0286214		12729	Clns1a	-2.12604	-0.80908	0.380558	0.570745	0.037622
14109	Fau	2.45391	0.806357	0.328601	1.74879	0.0286214		18036	Nfkbib	-2.12553	-0.55069	0.259083	0.682694	0.037622
19018	Scand1	2.45309	1.2713	0.518246	2.41379	0.0286214		12795	Plk3	-2.12385	-0.84036	0.395678	0.558503	0.037622
22380	Wbp4	2.4507	0.889864	0.363107	1.853	0.0286214		16979	Lrrn1	-2.12293	-0.93657	0.441171	0.522472	0.037622
101867	1500003O22Rik	2.44926	0.988538	0.403607	1.98417	0.0286214		12234	Btrc	-2.12272	-0.63096	0.29724	0.645747	0.037622
56018	Stard10	2.44866	1.09248	0.446155	2.13241	0.0286214		209131	Snx30	-2.12193	-0.84192	0.396772	0.5579	0.037622
17129	Smad5	2.44686	0.70705	0.288962	1.63246	0.0286214		66953	Cdca7	-2.12138	-0.74171	0.349638	0.598029	0.037622
64660	Mrps24	2.44508	0.723914	0.29607	1.65166	0.0286214		66884	Appbp2	-2.12039	-0.592	0.279196	0.663421	0.037622
15490	Hsd17b7	2.44446	0.947242	0.387505	1.92818	0.0286214		258901	Olfr1219	-2.12015	-0.56827	0.268032	0.674426	0.037622
55943	Stx8	2.44382	0.900734	0.368576	1.86702	0.0286214		70827	Trak2	-2.11987	-0.62236	0.293582	0.649609	0.037622
71947	2310067B10Rik	2.44268	0.863545	0.353524	1.8195	0.0286214		226977	Actr1b	-2.11978	-0.61468	0.289971	0.653077	0.037622
319165	Hist1h2ad	2.44231	1.07817	0.441455	2.11136	0.0286214		17220	Mcm7	-2.11913	-0.97345	0.459365	0.509286	0.037622
68092	Ncbp2	2.44219	0.73469	0.300833	1.66404	0.0286214		78890	2310079F23Rik	-2.11535	-0.89894	0.424959	0.536282	0.037622
56515	Rnf138	2.44081	0.748306	0.306581	1.67982	0.0286214		215748	Cnksr3	-2.11132	-0.57014	0.27004	0.673551	0.037622
20813	Srp14	2.44059	0.834009	0.341724	1.78263	0.0286214		13636	Efna1	-2.11036	-0.64034	0.303426	0.641562	0.037622
17826	Mtvr2	2.4372	0.89538	0.367381	1.8601	0.0286214		14570	Arhgdig	-2.10993	-0.87212	0.413342	0.546342	0.037622
76267	Fads1	2.43699	0.652644	0.267807	1.57205	0.0286214		211253	Mtrf1	-2.10894	-0.53908	0.255615	0.688211	0.037622
68735	Mrps18c	2.43678	1.00551	0.412638	2.00765	0.0286214		53318	Pdlim3	-2.10589	-1.90433	0.904289	0.26714	0.037622
66531	2310061C15Rik	2.43481	0.986702	0.405248	1.98165	0.0286214		28018	Ubfd1	-2.10453	-0.68129	0.323723	0.623609	0.037622
19299	Abcd3	2.43073	0.758147	0.311901	1.69132	0.0286214		112407	Egln3	-2.10368	-1.00101	0.47584	0.499649	0.037622
12457	Ccrn4l	2.42969	0.829523	0.341412	1.7771	0.0286214		77035	Jmjd5	-2.1035	-0.67092	0.318956	0.628105	0.037622
17886	Myh9	2.42916	0.755083	0.310841	1.68773	0.0286214		233863	Gtf3c1	-2.10129	-0.67772	0.322526	0.625151	0.037622
56445	Dnaja2	2.42639	0.811183	0.334317	1.75465	0.0286214		57439	Tmem183a	-2.10091	-0.59199	0.281777	0.663428	0.037622
84004	Mcam	2.42631	0.890144	0.366872	1.85336	0.0286214		24070	Mpdu1	-2.10034	-0.82359	0.392123	0.565034	0.037622
75415	Arhgap12	2.42572	1.37213	0.565659	2.58852	0.0286214		74412	Gle1	-2.0952	-0.51398	0.245314	0.700286	0.037622
17454	Mov10	2.4224	0.797487	0.329213	1.73807	0.0286214		17308	Mgat1	-2.09472	-0.53273	0.254321	0.691244	0.037622
56461	Kcnip3	2.42013	0.982836	0.406109	1.97635	0.0286214		52014	Nus1	-2.09369	-0.74987	0.358157	0.594657	0.037622
19027	Sypl	2.42008	0.722612	0.29859	1.65017	0.0286214		64833	Acot10	-2.09309	-0.91635	0.437798	0.529849	0.037622
19298	Pex19	2.41874	0.851495	0.352041	1.80437	0.0286214		23834	Cdc6	-2.09295	-0.75506	0.360764	0.592521	0.037622
16164	Il13ra1	2.41677	1.14723	0.474694	2.21488	0.0286214		217337	Srp68	-2.09071	-0.56041	0.268048	0.678109	0.037622
71820	Wdr34	2.41631	0.79454	0.328823	1.73452	0.0286214		56737	Alg2	-2.08938	-0.56938	0.272511	0.673906	0.037622
71310	Tbc1d9	2.41504	0.91611	0.379336	1.88702	0.0286214		12578	Cdkn2a	-2.08847	-0.70326	0.336736	0.614181	0.037622
246277	Csad	2.41478	0.933358	0.386519	1.90972	0.0286214		66830	Btbd14b	-2.08778	-0.65851	0.315414	0.63353	0.037622
66999	Med28	2.41326	0.910082	0.377117	1.87915	0.0286214		11432	Acp2	-2.08729	-0.93343	0.447196	0.523612	0.037622
74270	Usp20	2.41298	0.765588	0.317279	1.70006	0.0286214		76156	6330503C03Rik	-2.0868	-1.26642	0.606871	0.415691	0.037622
83486	Rbm5	2.41243	0.587426	0.2435	1.50256	0.0286214		109815	H47	-2.08603	-0.59583	0.285629	0.661664	0.037622
237052	Tceal1	2.41113	1.02667	0.425806	2.03732	0.0286214		72050	Kdelc1	-2.08527	-0.57711	0.276758	0.670304	0.037622
20620	Plk2	2.40464	1.64393	0.683647	3.12515	0.0286214		74088	0610012H03Rik	-2.08419	-0.98342	0.471848	0.505779	0.037622
108853	Mtrf1l	2.40368	0.881069	0.36655	1.84174	0.0286214		73658	Spns1	-2.08417	-0.55083	0.264293	0.682627	0.037622
66042	Sostdc1	2.40338	1.93436	0.804851	3.82209	0.0286214		56749	Dhodh	-2.08285	-0.62439	0.299774	0.648696	0.037622
67242	Gemin6	2.40167	1.73394	0.721972	3.32635	0.0286214		29808	Mga	-2.08273	-0.77228	0.370803	0.58549	0.037622
67938	Mylc2b	2.40036	1.39697	0.581983	2.63348	0.0286214		17219	Mcm6	-2.08225	-0.71867	0.34514	0.607659	0.037622
27176	Rpl7a	2.4002	1.67473	0.697745	3.19259	0.0286214		16392	Isl1	-2.08214	-0.96163	0.461846	0.513477	0.037622
20692	Sparc	2.39861	1.18523	0.494132	2.274	0.0286214		109093	Rars2	-2.08176	-0.56132	0.269637	0.677681	0.037622
19895	Rpia	2.39745	0.748063	0.312025	1.67954	0.0286214		74777	Sepn1	-2.08036	-0.74903	0.360049	0.595002	0.037622
22592	Ercc5	2.39646	0.767604	0.320308	1.70244	0.0286214		56226	Espn	-2.08015	-1.14159	0.548804	0.453259	0.037622
68394	0610037D15Rik	2.39593	0.869141	0.362758	1.82658	0.0286214		64930	Tsc1	-2.07688	-0.82831	0.398825	0.563187	0.037622
71238	Acn9	2.39477	1.09746	0.458275	2.13978	0.0286214		226442	Zfp281	-2.07646	-0.56376	0.2715	0.676537	0.037622
12915	Crebl1	2.39451	0.717311	0.299565	1.64411	0.0286214		21420	Tcfap2c	-2.0761	-0.81516	0.392641	0.568344	0.037622
226418	Yod1	2.39425	0.954976	0.398863	1.93855	0.0286214		235048	BC050092	-2.07593	-0.90606	0.436459	0.533641	0.037622
78521	B230219D22Rik	2.39319	0.897671	0.375094	1.86306	0.0286214		208624	Alg3	-2.07476	-0.6348	0.305963	0.64403	0.037622
20409	Ostf1	2.39064	0.925453	0.387114	1.89928	0.0286214		74104	Abcb6	-2.07472	-0.86961	0.419144	0.547296	0.037622
66047	Mrpl54	2.39034	0.696236	0.291271	1.62027	0.0286214		80284	BC003266	-2.06982	-0.6422	0.310266	0.640737	0.037622
207920	Rbm35a	2.38732	1.00348	0.420338	2.00483	0.0286214		56717	Frap1	-2.06181	-0.60609	0.293959	0.656976	0.037622
54401	Ywhab	2.38725	0.679565	0.284664	1.60166	0.0286214		74467	Ccdc139	-2.06166	-0.77957	0.378129	0.582539	0.037622
268294	Zbtb24	2.38511	0.599047	0.251162	1.51472	0.0286214		16897	Llgl1	-2.06091	-0.6031	0.292639	0.658337	0.037622
56458	Foxo1	2.38276	1.06893	0.448609	2.09787	0.0286214		225164	Mib1	-2.05988	-0.69346	0.336648	0.618371	0.037622
68939	Rasl11b	2.38233	1.01136	0.424525	2.01581	0.0286214		330817	Dhps	-2.05905	-0.72321	0.351234	0.605748	0.037622
12568	Cdk5	2.38195	0.647061	0.271652	1.56598	0.0286214		12896	Cpt2	-2.05837	-0.74169	0.360327	0.598039	0.037622
66448	Mrpl20	2.38161	0.894352	0.375525	1.85878	0.0286214		319757	Smo	-2.05679	-0.93522	0.454701	0.522961	0.037622
66403	Asf1a	2.38124	0.857027	0.359908	1.8113	0.0286214		77963	Hook1	-2.05568	-0.70148	0.341241	0.61494	0.037622
219103	Cenpj	2.38105	0.980737	0.411893	1.97347	0.0286214		20355	Sema4f	-2.05566	-0.60338	0.293522	0.658209	0.037622
17977	Ncoa1	2.37985	1.12165	0.471309	2.17595	0.0286214		18744	Pja1	-2.05553	-0.50801	0.247141	0.703194	0.037622
66361	Zfand1	2.37963	1.04031	0.437171	2.05666	0.0286214		11909	Atf2	-2.05524	-0.67542	0.32863	0.626152	0.037622
66202	1110059G10Rik	2.37877	0.693117	0.291376	1.61677	0.0286214		107829	Thoc5	-2.04646	-0.9206	0.449848	0.528291	0.037622
240725	Sulf1	2.37657	1.04843	0.441155	2.06828	0.0286214		14381	G6pdx	-2.04523	-0.77224	0.377582	0.585507	0.037622
105827	Amigo2	2.3753	0.962623	0.405264	1.94885	0.0286214		226123	BC023055	-2.04459	-0.69418	0.33952	0.61806	0.037622
66279	1810021J13Rik	2.37526	0.75242	0.316774	1.68462	0.0286214		24018	Rngtt	-2.04365	-0.65094	0.318517	0.636867	0.037622
216976	BC030499	2.3748	1.37367	0.578436	2.59128	0.0286214		20619	Snap23	-2.04067	-0.61598	0.301852	0.652486	0.037622
56369	Apip	2.37329	0.785444	0.330952	1.72362	0.0286214		245877	Mtap7d1	-2.03859	-0.76911	0.377277	0.586778	0.037622
66346	1700029P11Rik	2.37225	0.760691	0.320663	1.6943	0.0286214		70083	Metrn	-2.03797	-0.95126	0.466771	0.517179	0.037622
68135	Eif3h	2.37214	0.924627	0.389786	1.89819	0.0286214		52150	Kcnk6	-2.03719	-1.14312	0.561128	0.452778	0.037622
216560	AV249152	2.37204	0.655203	0.27622	1.57484	0.0286214		107371	Exoc6	-2.0367	-0.73321	0.359997	0.601565	0.037622
106639	AI662250	2.36832	1.06611	0.450152	2.09377	0.0286214		99010	Agpat7	-2.03526	-0.56804	0.2791	0.674532	0.037622
212627	Prpsap2	2.36555	0.850182	0.359401	1.80273	0.0286214		68796	1110039B18Rik	-2.03524	-0.6393	0.314116	0.642024	0.037622
85308	1500005A01Rik	2.36469	0.837982	0.354373	1.78755	0.0286214		71041	Pcgf6	-2.03475	-0.52941	0.260183	0.69284	0.037622
17347	Mknk2	2.36464	0.786866	0.332764	1.72532	0.0286214		77219	Zadh1	-2.03462	-0.81752	0.401804	0.567417	0.037622
67095	Trak1	2.36405	0.782154	0.330854	1.7197	0.0286214		66260	Tmem54	-2.03429	-0.97212	0.47787	0.509755	0.037622
26390	Mapkbp1	2.36166	0.789262	0.334198	1.72819	0.0286214		70450	Unc13d	-2.03365	-0.73385	0.360852	0.601298	0.037622
69226	Snx24	2.35774	0.83505	0.354174	1.78392	0.0286214		18704	Pik3c2a	-2.03057	-0.93619	0.461049	0.522611	0.037622
29869	Ulk2	2.35654	0.932829	0.395846	1.90902	0.0286214		50880	Scly	-2.03031	-0.79451	0.391325	0.576539	0.037622
240354	Malt1	2.35289	1.02068	0.433797	2.02887	0.0286214		13216	Defa1	-2.0297	-0.8124	0.400255	0.569435	0.037622
20320	Nptn	2.3514	0.819107	0.348348	1.76431	0.0286214		51897	D2Ertd391e	-2.02936	-0.5891	0.290287	0.664759	0.037622
209760	Tmc7	2.34888	0.828184	0.352587	1.77545	0.0286214		239796	1600021P15Rik	-2.02913	-0.74513	0.367218	0.596612	0.037622
320271	A930041I02Rik	2.34854	0.605468	0.257806	1.52147	0.0286214		81910	Rrbp1	-2.02663	-0.7727	0.381273	0.585322	0.037622
18035	Nfkbia	2.34818	1.07156	0.456334	2.1017	0.0286214		59093	Pcbp3	-2.02584	-0.77665	0.383372	0.58372	0.037622
108138	Xrcc4	2.34703	0.984645	0.419528	1.97883	0.0286214		23960	Oas1g	-2.02513	-0.6034	0.297958	0.6582	0.037622
94245	Dtnbp1	2.34587	0.764396	0.325847	1.69866	0.0286214		66711	Sbds	-2.02189	-0.69157	0.342039	0.619182	0.037622
74277	Chic2	2.34285	0.863423	0.368535	1.81935	0.0286214		11513	Adcy7	-2.02032	-0.54643	0.270465	0.684715	0.037622
67067	2010100O12Rik	2.34066	1.00058	0.427478	2.00081	0.0286214		94184	Pdxdc1	-2.01885	-0.78183	0.387264	0.581629	0.037622
66387	Nudt8	2.33509	0.787278	0.337151	1.72581	0.0286214		83397	Akap12	-2.01797	-0.95995	0.475701	0.514074	0.037622
68119	Cmtm3	2.33309	0.997056	0.427354	1.99592	0.0286214		26556	Homer1	-2.01682	-0.67593	0.335144	0.62593	0.037622
56174	Nagk	2.33301	0.628906	0.269569	1.54639	0.0286214		100532	Rell1	-2.01638	-0.70495	0.349613	0.613462	0.037622
71883	Coq2	2.3311	0.751546	0.3224	1.6836	0.0286214		105782	Scrib	-2.01611	-0.49722	0.246624	0.70847	0.037622
20755	Sprr2a	2.32628	1.12519	0.483686	2.1813	0.0286214		68272	Rbm28	-2.01407	-0.62303	0.309336	0.649308	0.037622
67157	2610301B20Rik	2.32495	0.758226	0.326126	1.69141	0.0286214		17896	Myl4	-2.01301	-1.29361	0.642625	0.40793	0.037622
240675	Vwa2	2.32226	1.11117	0.478484	2.1602	0.0286214		244810	AW551984	-2.01226	-0.82318	0.409081	0.565197	0.037622
67538	Zswim3	2.3216	0.693931	0.298902	1.61769	0.0286214		16001	Igf1r	-2.01145	-1.16469	0.579029	0.446061	0.037622
66433	Chchd7	2.32039	0.713963	0.307692	1.6403	0.0286214		435684	Shf	-2.01142	-0.68884	0.342467	0.62035	0.037622
22249	Unc13b	2.31963	0.882648	0.380513	1.84376	0.0286214		68018	Col4a3bp	-2.01131	-0.69892	0.347493	0.616035	0.037622
13644	Efs	2.31931	0.60977	0.26291	1.52602	0.0286214		234069	Pcid2	-2.00986	-0.76981	0.38302	0.586493	0.037622
56716	Gbl	2.31076	0.555511	0.240402	1.46969	0.0286214		17237	Mgrn1	-2.00968	-0.69058	0.343628	0.619604	0.037622
224640	Lemd2	2.31059	0.604186	0.261486	1.52012	0.0286214		211323	Nrg1	-2.00964	-0.69766	0.347158	0.616571	0.037622
72181	Nsun4	2.30974	1.08879	0.471391	2.12696	0.0286214		72149	2610019A05Rik	-2.00906	-0.509	0.253352	0.70271	0.037622
67892	1810063B05Rik	2.30926	0.707207	0.306248	1.63264	0.0286214		18451	P4ha1	-2.00804	-0.73924	0.368139	0.599056	0.037622
67665	Dctn4	2.30914	0.828275	0.358694	1.77556	0.0286214		69309	Slc16a13	-2.00756	-0.88369	0.440182	0.541979	0.037622
14683	Gnas	2.3076	1.67457	0.725675	3.19224	0.0286214		73274	Gpbp1	-2.00536	-0.55116	0.274845	0.682469	0.037622
319168	Hist1h2ah	2.30739	1.08985	0.472331	2.12852	0.0286214		11727		-2.00345	-0.79217	0.395405	0.577474	0.037622
382406	Wdr51b	2.30574	0.898641	0.389741	1.86431	0.0286214		78619	Zfp449	-2.00198	-0.79998	0.399595	0.574358	0.037622
59049	Slc22a17	2.30383	0.921295	0.399898	1.89381	0.0286214		68510	Ints1	-2.00143	-0.69199	0.345749	0.618998	0.037622
170460	Stard5	2.30306	0.956513	0.415323	1.94061	0.0286214		214444	Cdk5rap2	-2.00009	-0.68409	0.342032	0.622396	0.037622
52432	Ppp2r2d	2.30148	0.649736	0.282312	1.56888	0.0286214		192170	Eif4a3	-1.99942	-0.73558	0.367895	0.600577	0.037622
18582	Pde6d	2.29912	0.877835	0.381814	1.83762	0.0286214		227682	Trub2	-1.99746	-0.52148	0.261072	0.696657	0.037622
68618	1110012L19Rik	2.29801	0.910148	0.39606	1.87924	0.0286214		14000	Rnasen	-1.99718	-0.58169	0.291253	0.668183	0.037622
216558	Ugp2	2.29738	0.895904	0.389968	1.86078	0.0286214		71770	Ap2b1	-1.9966	-0.59414	0.297578	0.662438	0.037622
232334	Vgll4	2.29595	0.854176	0.372036	1.80773	0.0286214		330192	Vps37b	-1.99455	-0.52302	0.262223	0.695915	0.037622
212139	Cc2d1a	2.29544	0.752386	0.327774	1.68458	0.0286214		74766	Yipf2	-1.99252	-0.58734	0.29477	0.66557	0.037622
12512	Cd63	2.29409	0.947385	0.412967	1.92837	0.0286214		13346	Des	-1.99103	-0.9452	0.47473	0.519357	0.037622
71832	Csl	2.29251	0.981149	0.427981	1.97404	0.0286214		218832	Polr3a	-1.9897	-0.6174	0.310296	0.651847	0.037622
19084	Prkar1a	2.29212	0.646006	0.281838	1.56483	0.0286214		270058	Mtap1s	-1.98963	-0.54645	0.27465	0.684702	0.037622
20535	Slc4a2	2.28982	0.75725	0.330703	1.69027	0.0286214		54563	Nup210	-1.9891	-0.73996	0.372007	0.598756	0.037622
64144	Mllt1	2.28772	0.852648	0.372706	1.80581	0.0286214		338366	Mia3	-1.98901	-0.84493	0.424798	0.556739	0.037622
66168	Grina	2.28766	0.687711	0.300618	1.61073	0.0286214		414109	9830163H01Rik	-1.98593	-0.84612	0.426057	0.556279	0.037622
67105	1700034H14Rik	2.28646	0.92896	0.406288	1.9039	0.0286214		381314	Iars2	-1.98492	-0.56524	0.284768	0.675843	0.037622
52502	Carhsp1	2.28623	0.671492	0.293712	1.59272	0.0286214		17193	Mbd4	-1.98384	-0.628	0.316557	0.647073	0.037622
66867	Hmg20a	2.28474	0.624015	0.273123	1.54116	0.0286214		22365	Vps45	-1.98004	-0.51685	0.261032	0.698895	0.037622
108098	Med21	2.28205	0.870338	0.381385	1.82809	0.0286214		16977	Lrrc23	-1.97961	-0.6805	0.343754	0.62395	0.037622
50875	Tmod3	2.28158	0.653003	0.286206	1.57244	0.0286214		68080	Atpbd1c	-1.97634	-0.57309	0.289977	0.672174	0.037622
22377	Wbp1	2.28001	0.838008	0.367546	1.78758	0.0286214		28105	Trim36	-1.97568	-0.61596	0.31177	0.652497	0.037622
67676	Rpp21	2.27816	0.689164	0.302509	1.61235	0.0286214		320806	Gfm2	-1.97448	-0.60758	0.307716	0.656298	0.037622
30951	Cbx8	2.27706	1.00172	0.439918	2.00239	0.0286214		433804	OTTMUSG00000010673	-1.9744	-0.81338	0.411962	0.569047	0.037622
74123	Foxp4	2.27425	0.81839	0.359851	1.76344	0.0286214		71865	Fbxo30	-1.9723	-0.67656	0.343033	0.625654	0.037622
17449	Mdh1	2.27114	0.757113	0.333363	1.6901	0.0286214		225372	Apbb3	-1.97223	-0.52845	0.267947	0.693298	0.037622
17125	Smad1	2.26982	0.891666	0.392835	1.85532	0.0286214		227331	Tnrc15	-1.97198	-0.73032	0.370348	0.602771	0.037622
211948	E430028B21Rik	2.26835	0.588383	0.259388	1.50356	0.0286214		228061	Agps	-1.97178	-0.70785	0.358991	0.612231	0.037622
67898	Pef1	2.26824	0.676071	0.29806	1.59778	0.0286214		191578	Hel308	-1.96895	-0.7633	0.38767	0.589145	0.037622
22320	Vamp8	2.26816	0.952488	0.419939	1.93521	0.0286214		70790	Ubr5	-1.96773	-0.58815	0.2989	0.665193	0.037622
76467	Msrb2	2.26782	1.37838	0.607798	2.59976	0.0286214		74126	Syvn1	-1.96763	-0.59922	0.304538	0.660113	0.037622
77877	6030458C11Rik	2.26779	1.02127	0.450338	2.02971	0.0286214		21987	Tpd52l1	-1.96708	-0.7102	0.361044	0.611235	0.037622
231470	Fras1	2.26624	1.02473	0.452171	2.03457	0.0286214		66153	Fbxo36	-1.96697	-0.71164	0.361793	0.610627	0.037622
66142	Cox7b	2.26608	1.57566	0.695322	2.98071	0.0286214		65973	Asph	-1.96591	-0.50515	0.256954	0.704588	0.037622
67178	Zmat5	2.26321	0.79661	0.351982	1.73701	0.0286214		78914	Nadsyn1	-1.96535	-0.61084	0.310803	0.654817	0.037622
13998	Fgd6	2.26243	0.987718	0.436574	1.98305	0.0286214		14088	Fancc	-1.96379	-0.54475	0.277399	0.685509	0.037622
72046	2010005J08Rik	2.26232	0.62849	0.277808	1.54595	0.0286214		73419	1700052N19Rik	-1.96184	-0.55066	0.280684	0.68271	0.037622
56208	Becn1	2.2614	0.961012	0.424963	1.94668	0.0286214		60530	Fignl1	-1.96181	-0.63395	0.323143	0.644411	0.037622
70160	Vps36	2.26079	0.868958	0.38436	1.82634	0.0286214		97863	C78339	-1.96123	-0.69801	0.355907	0.61642	0.037622
70527	Stambp	2.25817	0.860367	0.381002	1.8155	0.0286214		16974	Lrp6	-1.95966	-0.74527	0.380305	0.596557	0.037622
239027	Arhgap22	2.2561	1.29081	0.572141	2.44665	0.0286214		13870	Ercc1	-1.95713	-0.58542	0.29912	0.666457	0.037622
243529	H1fx	2.25584	0.607571	0.269332	1.52369	0.0286214		69780	Smap1l	-1.957	-0.53661	0.2742	0.689389	0.037622
20324	Sdpr	2.25182	1.39591	0.619903	2.63155	0.0286214		67465	Sf3a1	-1.95606	-0.51544	0.263508	0.699581	0.037622
244757	BC038479	2.2515	0.838001	0.372197	1.78757	0.0286214		333424	A4gnt	-1.95581	-0.55728	0.284935	0.679584	0.037622
74596	Cds1	2.24991	1.05239	0.46775	2.07397	0.0286214		228869	Ncoa5	-1.95556	-0.51043	0.261016	0.702012	0.037622
211255	Kbtbd7	2.24719	0.732084	0.325778	1.66104	0.0286214		77632	Pramef12	-1.9555	-0.76161	0.389473	0.589836	0.037622
110956	D17H6S56E-5	2.24701	1.2539	0.558031	2.38485	0.0286214		218699	Pxk	-1.95102	-0.69578	0.356622	0.617377	0.037622
74166	Tmem38a	2.24552	0.684689	0.304914	1.60736	0.0286214		72027	Slc39a4	-1.95049	-0.89085	0.456733	0.539296	0.037622
12465	Cct5	2.24528	1.40901	0.627541	2.65554	0.0286214		211586	Tfdp2	-1.94904	-0.51423	0.263836	0.700168	0.037622
67446	Dusp28	2.24404	1.16431	0.518846	2.24126	0.0286214		20744	Strbp	-1.94902	-0.60884	0.31238	0.655726	0.037622
19328	Rab12	2.24267	0.786243	0.350584	1.72458	0.0286214		18648	Pgam1	-1.9487	-0.7917	0.406271	0.577662	0.037622
67713	Dnajc19	2.24131	0.724629	0.323306	1.65248	0.0286214		231452	Sdad1	-1.94801	-0.57797	0.296699	0.669904	0.037622
12419	Cbx5	2.23913	1.26948	0.566952	2.41074	0.0286214		69714	Tfpt	-1.94726	-0.52093	0.267517	0.696925	0.037622
68183	Bcas2	2.23684	0.794134	0.355024	1.73404	0.0286214		19367	Rad9	-1.94395	-0.7398	0.380568	0.59882	0.037622
14870	Gstp1	2.23504	1.29417	0.57904	2.45237	0.0286214		66622	5730410I19Rik	-1.94364	-0.61957	0.318768	0.650865	0.037622
12842	Col1a1	2.2346	1.7973	0.804304	3.47569	0.0286214		236848	BC023829	-1.94229	-0.77258	0.397769	0.585369	0.037622
213827	Arcn1	2.23288	0.957071	0.428626	1.94136	0.0286214		18432	Mybbp1a	-1.94161	-0.90039	0.463732	0.535744	0.037622
228801	U46068	2.23243	0.938222	0.42027	1.91616	0.0286214		14423	Galnt1	-1.93997	-0.51766	0.266838	0.698505	0.037622
66841	Etfdh	2.23229	0.630807	0.282583	1.54843	0.0286214		68975	Med27	-1.93977	-0.58755	0.302894	0.665474	0.037622
68750	Rreb1	2.23221	0.990627	0.443788	1.98705	0.0286214		22222	Ubr1	-1.93931	-0.68511	0.353277	0.621957	0.037622
54383	Phc2	2.23026	0.717624	0.321766	1.64447	0.0286214		17688	Msh6	-1.93918	-0.55661	0.287036	0.679896	0.037622
26900	Ddx3y	2.23023	1.35622	0.608109	2.56014	0.0286214		319562	9630028B13Rik	-1.93882	-0.54807	0.282681	0.683936	0.037622
20280	Scp2	2.23012	0.879332	0.394298	1.83952	0.0286214		75570	Nhej1	-1.93627	-1.00893	0.521071	0.496913	0.037622
80912	Pum1	2.22734	0.852591	0.382784	1.80574	0.0286214		66411	Tbcb	-1.93622	-0.55114	0.284649	0.682479	0.037622
56690	Mlycd	2.22614	0.703254	0.315907	1.62817	0.0286214		19364	Rad51l3	-1.93456	-0.71174	0.367909	0.610583	0.037622
93686	Rbm9	2.22467	0.790148	0.355176	1.72925	0.0286214
83669	Wdr6	2.22454	0.956387	0.429926	1.94044	0.0286214
71817	Tmem50a	2.22418	0.714511	0.321247	1.64093	0.0286214
194237	BC057371	2.22157	0.666271	0.29991	1.58697	0.0286214
22185	U2af2	2.21958	0.75468	0.340011	1.68726	0.0286214
230088	B230312A22Rik	2.21821	0.864239	0.38961	1.82038	0.0286214
19159	Pscd3	2.21775	0.8176	0.368662	1.76247	0.0286214
14128	Fcer2a	2.21771	0.744848	0.335864	1.6758	0.0286214
241638	Prosapip1	2.21761	0.640699	0.288914	1.55908	0.0286214
70227	Zfp619	2.2172	0.916926	0.413551	1.88809	0.0286214
219151	Scara3	2.21582	1.10911	0.500539	2.15712	0.0286214
13198	Ddit3	2.21478	0.94206	0.425351	1.92127	0.0286214
12740	Cldn4	2.21421	1.11466	0.503412	2.16544	0.0286214
69257	Elf2	2.21392	0.767925	0.346861	1.70282	0.0286214
16784	Lamp2	2.21241	0.759659	0.343362	1.69309	0.0286214
69635	Dapk1	2.21163	0.891552	0.40312	1.85517	0.0286214
56738	Mocs1	2.21084	0.611901	0.276772	1.52827	0.0286214
12857	Cox4i1	2.20914	0.712121	0.322352	1.63821	0.0286214
26397	Map2k3	2.20831	0.583613	0.264281	1.4986	0.0286214
22779	Ikzf2	2.20723	1.04509	0.473485	2.06349	0.0286214
14049	Eya2	2.20618	0.699472	0.317051	1.62391	0.0286214
12660	Chka	2.20267	0.75545	0.34297	1.68816	0.0286214
212090	Tmem60	2.19967	0.602464	0.273888	1.51831	0.0286214
229473	D930015E06Rik	2.1978	0.734853	0.334358	1.66423	0.0286214
21841	Tia1	2.19727	0.571816	0.260239	1.48639	0.0286214
67231	Tbc1d20	2.19587	0.610586	0.278061	1.52688	0.0286214
57437	Golga7	2.1914	1.89401	0.864292	3.71667	0.0286214
66674	6330409N04Rik	2.19134	0.670104	0.305797	1.59119	0.0286214
233765	Plekha7	2.19074	0.768032	0.350581	1.70294	0.0286214
23873	Faim	2.18898	0.788812	0.360356	1.72765	0.0286214
68607	Serhl	2.18825	0.67109	0.30668	1.59228	0.0286214
12757	Clta	2.18703	0.759331	0.347197	1.69271	0.0286214
104943	9030611O19Rik	2.18602	0.779988	0.356808	1.71712	0.0286214
114874	Ddhd1	2.18601	0.758579	0.347015	1.69182	0.0286214
233489	Picalm	2.18505	1.09763	0.502338	2.14003	0.0286214
230119	Zbtb5	2.18364	0.675789	0.309479	1.59747	0.0286214
54636	Wdr45	2.18327	0.673565	0.308512	1.59501	0.0286214
68718	Rnf166	2.18251	0.796577	0.364982	1.73698	0.0286214
76261	0610040J01Rik	2.18096	0.689183	0.315999	1.61237	0.0286214
22601	Yap1	2.17797	0.71999	0.330579	1.64717	0.0286214
66890	Lman2	2.17783	0.837021	0.384338	1.78636	0.0286214
13057	Cyba	2.17704	0.780758	0.358632	1.71803	0.0286214
56428	Mtch2	2.17626	0.903897	0.415344	1.87111	0.0286214
240832	Tor1aip2	2.17624	0.913192	0.41962	1.88321	0.0286214
20592	Jarid1d	2.17559	1.43152	0.657993	2.69732	0.0286214
320795	Pkn1	2.17361	0.674554	0.310338	1.5961	0.0286214
66928	3110001D03Rik	2.17326	0.719274	0.330965	1.64635	0.0286214
22194	Ube2e1	2.17229	1.78758	0.822905	3.45236	0.0286214
83796	Smarcd2	2.17124	0.724283	0.333581	1.65208	0.0286214
12982		2.17098	0.945692	0.435606	1.92611	0.0286214
240322	Adamts19	2.17073	1.29177	0.595086	2.44828	0.0286214
66395	Ahnak	2.16958	1.02544	0.472644	2.03558	0.0286214
22327	Vbp1	2.16951	0.832726	0.383832	1.78105	0.0286214
66151	Prr13	2.1677	0.747826	0.344986	1.67926	0.0286214
78284	Creb3l4	2.16668	0.784244	0.361957	1.72219	0.0286214
26451	Rpl27a	2.16631	0.604031	0.27883	1.51996	0.0286214
76650	Srxn1	2.16596	0.712765	0.329077	1.63894	0.0286214
56318	Acpp	2.16497	1.00226	0.462947	2.00314	0.0286214
319169	Hist1h2ak	2.16388	1.11521	0.515374	2.16626	0.0286214
17434	Mocs2	2.16375	1.01677	0.469912	2.02339	0.0286214
232196	C87436	2.16281	0.644313	0.297905	1.563	0.0286214
11461	Actb	2.16106	1.44184	0.667188	2.71666	0.0286214
69104	2011-03-05	2.16082	0.768436	0.355623	1.70342	0.0286214
26395	Map2k1	2.1591	0.846303	0.39197	1.79789	0.0286214
108013	Brunol4	2.15767	0.952774	0.441575	1.93559	0.0286214
71242	5133400G04Rik	2.15731	0.97711	0.452929	1.96852	0.0286214
69596	2310035K24Rik	2.15295	0.605058	0.281037	1.52104	0.0286214
68198	Ndufb2	2.15284	0.820936	0.381328	1.76655	0.0286214
16478	Jund	2.15142	1.0972	0.509987	2.13939	0.0286214
67710	Polr2g	2.15142	0.833367	0.387357	1.78184	0.0286214
69216	Ccdc23	2.15127	0.748141	0.347767	1.67963	0.0286214
228859	D930001I22Rik	2.14215	0.622102	0.290411	1.53912	0.0286214
352968	D830050J10Rik	2.13967	0.810145	0.378632	1.75339	0.0286214
107734	Mrpl30	2.13846	0.701363	0.327975	1.62604	0.0286214
245297	EG245297	2.13777	0.749866	0.35077	1.68164	0.0286214
231889	Bud31	2.13723	1.10097	0.51514	2.145	0.0286214
94186	Strn3	2.13473	0.747932	0.350364	1.67938	0.0286214
327900	Ubtd2	2.13428	0.648456	0.303829	1.56749	0.0286214
64933	Ap3m2	2.13369	0.582275	0.272896	1.49721	0.0286214
70750	Fvt1	2.13204	0.595268	0.279201	1.51075	0.0286214
66340	Psenen	2.13146	0.748583	0.351207	1.68014	0.0286214
73124	Golim4	2.13109	0.702445	0.329618	1.62726	0.0286214
66532	2210417D09Rik	2.12563	0.717358	0.337481	1.64417	0.0286214
18643	Pfn1	2.12221	1.09096	0.514067	2.13016	0.0286214
381668	2410025L10Rik	2.11919	0.593124	0.279882	1.50851	0.0286214
67219	Med18	2.11763	1.52206	0.718757	2.87201	0.0286214
20923		2.11483	1.11473	0.527104	2.16555	0.0286214
56724	Cript	2.11349	0.697349	0.329951	1.62152	0.0286214
58799	Crbn	2.11249	0.910758	0.431131	1.88003	0.0286214
381101	BC048355	2.11186	1.33797	0.63355	2.52795	0.0286214
216829	BC025076	2.11043	0.834895	0.395605	1.78373	0.0286214
353187	Nr1d2	2.10839	0.815036	0.386568	1.75934	0.0286214
70186	2310056P07Rik	2.10806	0.684415	0.324666	1.60705	0.0286214
319740	Zfyve27	2.10656	0.625972	0.297154	1.54325	0.0286214
214133	E130014J05Rik	2.10486	0.936454	0.4449	1.91382	0.0286214
18674	Slc25a3	2.10485	0.781034	0.371064	1.71836	0.0286214
223773	Zbed4	2.10321	0.91056	0.432939	1.87978	0.0286214
27377	Yme1l1	2.0987	0.965493	0.460044	1.95273	0.0286214
15931	Ids	2.09842	0.825616	0.393447	1.77229	0.0286214
55980	Impa1	2.09809	0.798912	0.380781	1.73979	0.0286214
71279	Slc29a3	2.09738	0.854284	0.40731	1.80786	0.0286214
233890	Zfp768	2.09614	0.760608	0.362862	1.6942	0.0286214
67030	Fancl	2.09306	0.785198	0.375143	1.72333	0.0286214
17761	Mtap7	2.09283	1.00714	0.481231	2.00992	0.0286214
67131	Acbd4	2.09175	0.972595	0.464966	1.96237	0.0286214
78541	Asb8	2.09149	0.816951	0.390607	1.76168	0.0286214
67286	Rabl5	2.0901	0.795605	0.380653	1.73581	0.0286214
66513	Map3k7ip1	2.08971	1.08406	0.51876	2.11999	0.0286214
407786	Taf9b	2.08961	0.843526	0.403677	1.79443	0.0286214
384281	2010003O18Rik	2.08936	0.645707	0.309046	1.56451	0.0286214
319666		2.08924	0.745906	0.357022	1.67703	0.0286214
27419	Naglu	2.08822	0.874246	0.418656	1.83305	0.0286214
408022	Ccdc111	2.08799	0.715614	0.342728	1.64218	0.0286214
19041	Ppl	2.08777	0.674452	0.323049	1.59599	0.0286214
19766	Ripk1	2.08715	0.727074	0.348356	1.65528	0.0286214
67126	Atp5e	2.08604	1.67157	0.801314	3.18561	0.0286214
70544	5730437N04Rik	2.08394	1.20789	0.579619	2.30999	0.0286214
74772	Atp13a2	2.08302	0.701103	0.33658	1.62575	0.0286214
260423	Hist1h3f	2.08261	1.22997	0.59059	2.34562	0.0286214
67680	Sdhb	2.08054	0.641441	0.308304	1.55989	0.0286214
66505	Zmynd11	2.08039	0.837067	0.40236	1.78642	0.0286214
13641	Efnb1	2.08003	0.552436	0.26559	1.46656	0.0286214
56470	Rgs19	2.07933	0.728014	0.350119	1.65636	0.0286214
12153	Bmp1	2.07805	0.672477	0.32361	1.59381	0.0286214
15278	Tfb2m	2.07764	0.673244	0.324042	1.59465	0.0286214
20826	Nhp2l1	2.07669	1.01542	0.488959	2.02149	0.0286214
76491	Abhd14b	2.07613	0.732185	0.352668	1.66115	0.0286214
52033	Pbk	2.07529	0.722175	0.347987	1.64967	0.0286214
54405	Ndufa1	2.07121	0.766681	0.370162	1.70135	0.0286214
74670	4930432O21Rik	2.06882	0.745266	0.360237	1.67628	0.0286214
11702	Amd1	2.06801	0.686374	0.3319	1.60923	0.0286214
232491	Pyroxd1	2.06539	0.776516	0.375966	1.71299	0.0286214
11749	Anxa6	2.06443	0.733159	0.355139	1.66228	0.0286214
80876	Ifitm2	2.06431	0.908906	0.440295	1.87762	0.0286214
72039	Mccc1	2.06231	0.999959	0.484874	1.99994	0.0286214
66943	Pqlc1	2.06128	0.905601	0.439338	1.87332	0.0286214
109079	Sephs1	2.06126	0.6553	0.317912	1.57494	0.0286214
67605	Akt1s1	2.06109	0.602944	0.292536	1.51881	0.0286214
70461	Crtc3	2.05927	0.965528	0.468868	1.95278	0.0286214
17775	Laptm4a	2.05729	0.853613	0.414922	1.80702	0.0286214
76899	Golga1	2.05685	0.696319	0.338536	1.62036	0.0286214
78294	Rps27a	2.05184	1.08174	0.527207	2.11659	0.0286214
94112	Med15	2.05179	0.592233	0.288642	1.50758	0.0286214
234683	Elmo3	2.05029	0.789389	0.385013	1.72834	0.0286214
56199	Abcb10	2.04982	0.820682	0.400367	1.76624	0.0286214
24128	Xrn2	2.04722	0.847119	0.41379	1.7989	0.0286214
18771	Pknox1	2.04347	0.557194	0.272671	1.4714	0.0286214
56812	Dnajb10	2.04257	0.746821	0.365629	1.67809	0.0286214
15204	Herc2	2.04076	0.595194	0.291653	1.51068	0.0376225
20422	Shfm1	2.03978	0.703151	0.344719	1.62806	0.0376225
269514	Fbxl4	2.03943	0.7515	0.368486	1.68354	0.0376225
20054	Rps15	2.03892	1.00848	0.494614	2.01179	0.0376225
20351	Sema4a	2.03512	1.24246	0.610509	2.36601	0.0376225
233908	Fus	2.03509	1.07434	0.527908	2.10576	0.0376225
22670	Trim26	2.03301	0.839336	0.412854	1.78923	0.0376225
21380	Tbx1	2.03159	1.54585	0.760909	2.91977	0.0376225
110954	Rpl10	2.03137	0.666966	0.328333	1.58773	0.0376225
319996	Casc4	2.02977	0.923054	0.454759	1.89613	0.0376225
11819	Nr2f2	2.02853	1.7521	0.86373	3.36849	0.0376225
20817	Srpk2	2.02793	0.701568	0.345953	1.62627	0.0376225
228983	Osbpl2	2.02665	0.675213	0.333168	1.59683	0.0376225
15473	Hrsp12	2.02584	0.759531	0.374921	1.69294	0.0376225
67733	Itgb3bp	2.02442	1.16226	0.574119	2.23808	0.0376225
17190	Mbd1	2.02123	0.829012	0.410152	1.77647	0.0376225
12301	Cacybp	2.02107	0.957282	0.473652	1.94165	0.0376225
15425	Hoxc6	2.01835	1.76381	0.873885	3.39593	0.0376225
212647	Aldh4a1	2.01412	0.579182	0.287561	1.494	0.0376225
67768	N6amt1	2.0135	0.80725	0.40092	1.74987	0.0376225
22404	Wiz	2.01253	0.537368	0.267011	1.45132	0.0376225
22193	Ube2e3	2.01101	1.44893	0.720499	2.73006	0.0376225
21753	Tes	2.00657	0.570924	0.284527	1.48547	0.0376225
72154	Zfp157	2.00558	0.563686	0.281058	1.47804	0.0376225
76051	Ganc	2.00505	0.819776	0.408855	1.76513	0.0376225
414077	BC056474	2.00383	0.92549	0.461859	1.89933	0.0376225
21750	Terf2	2.00228	0.581246	0.290291	1.49614	0.0376225
68033	Cox19	2.00032	0.669017	0.334455	1.58999	0.0376225
240334	Pcyox1l	1.9963	0.575741	0.288404	1.49044	0.0376225
24071	Synj2bp	1.99481	1.07206	0.537426	2.10244	0.0376225
217588	Mbip	1.9939	0.944056	0.473472	1.92393	0.0376225
66847	Hint3	1.99379	0.610135	0.306017	1.5264	0.0376225
545007	ENSMUSG00000068790	1.99337	0.927801	0.465443	1.90237	0.0376225
66154	Tmem14c	1.99232	1.7947	0.900805	3.46942	0.0376225
66061	0610012D17Rik	1.99182	0.841963	0.422711	1.79249	0.0376225
20515	Slc20a1	1.99173	0.577502	0.28995	1.49226	0.0376225
106585	Ankrd12	1.9911	0.690954	0.347021	1.61435	0.0376225
67248	Rpl39	1.98746	0.750303	0.377518	1.68215	0.0376225
212862	Chpt1	1.98647	0.665946	0.335241	1.58661	0.0376225
66441	2010012C16Rik	1.98529	0.961853	0.484489	1.94781	0.0376225
99031	Osbpl6	1.98311	0.836324	0.421725	1.7855	0.0376225
321000	4933421E11Rik	1.98213	0.512781	0.258702	1.4268	0.0376225
72536	Tagap	1.98187	0.548998	0.27701	1.46307	0.0376225
66242	Mrps16	1.98094	0.722402	0.364676	1.64993	0.0376225
66147	Necap2	1.98054	0.756451	0.381942	1.68933	0.0376225
108099	Prkag2	1.97954	0.804493	0.406404	1.74653	0.0376225
13205	Ddx3x	1.97913	0.912467	0.461046	1.88226	0.0376225
103850	Nt5m	1.9787	0.575021	0.290605	1.4897	0.0376225
218232	Ptpdc1	1.97719	0.823018	0.416257	1.7691	0.0376225
21815	Tgif1	1.97681	0.798335	0.403849	1.73909	0.0376225
76522	Lsm8	1.97481	0.673879	0.341238	1.59536	0.0376225
11812	Apoc1	1.97383	0.573039	0.290319	1.48765	0.0376225
112406	Egln2	1.97257	0.71052	0.3602	1.63639	0.0376225
216831	AU040829	1.9697	0.733701	0.372494	1.6629	0.0376225
19044	Ppox	1.96882	0.602102	0.305819	1.51793	0.0376225
19697	Rela	1.96822	0.543027	0.275897	1.45703	0.0376225
19012	Ppap2a	1.96704	0.513708	0.261157	1.42771	0.0376225
74200	2810403A07Rik	1.96603	0.51323	0.261049	1.42724	0.0376225
71726	Smug1	1.96542	0.67541	0.343646	1.59705	0.0376225
73170	Rwdd3	1.96228	0.685617	0.349398	1.60839	0.0376225
13121	Cyp51	1.9594	1.1268	0.575074	2.18374	0.0376225
94064	Mrpl27	1.9561	0.7194	0.367773	1.6465	0.0376225
14828	Hspa5	1.95558	0.890997	0.455618	1.85446	0.0376225
20846	Stat1	1.95481	0.823653	0.421347	1.76988	0.0376225
105732	AA409316	1.9539	1.07435	0.549847	2.10577	0.0376225
93765	Ube2n	1.95348	0.580973	0.297404	1.49586	0.0376225
14533	Bloc1s1	1.95343	0.757325	0.387689	1.69035	0.0376225
73847	5430432M24Rik	1.95314	0.648411	0.331984	1.56744	0.0376225
100198	H6pd	1.95247	0.867672	0.444396	1.82472	0.0376225
58810	Akr1a4	1.95002	0.642533	0.329501	1.56107	0.0376225
66789	Alg14	1.9499	0.719113	0.368795	1.64617	0.0376225
26932	Ppp2r5e	1.94989	0.466165	0.239072	1.38143	0.0376225
69009	Thap7	1.94949	0.632468	0.324428	1.55021	0.0376225
56324	Stam2	1.94933	0.511042	0.262163	1.42508	0.0376225
23942	Mta2	1.949	0.800268	0.410604	1.74142	0.0376225
21927	Tnfaip1	1.94758	0.70952	0.364308	1.63526	0.0376225
23950	Dnajb6	1.94678	0.769468	0.395251	1.70464	0.0376225
241943	Ccdc144b	1.94648	0.942936	0.484432	1.92244	0.0376225
170439	Elovl6	1.94617	0.537405	0.276135	1.45136	0.0376225
76485	Glt8d1	1.94342	0.537894	0.276777	1.45185	0.0376225
216767	Mrpl22	1.93975	0.590909	0.304631	1.5062	0.0376225
54198	Snx3	1.93967	0.791155	0.407882	1.73046	0.0376225
74287	Kcmf1	1.93652	0.699243	0.361082	1.62365	0.0376225
12793	Cnih	1.93507	1.01942	0.52681	2.0271	0.0376225
228421	Kif18a	1.93457	0.798476	0.41274	1.73926	0.0376225
16653	Kras	1.93307	0.783375	0.405249	1.72115	0.0376225
28169	Agpat3	1.92651	0.533238	0.276789	1.44717	0.0376225
52036	Saps3	1.92557	0.563873	0.292834	1.47823	0.0376225
12833	Col6a1	1.92464	1.88107	0.977363	3.68348	0.0376225
11745	Anxa3	1.92448	0.735106	0.381976	1.66452	0.0376225
12162	Bmp7	1.9243	0.911119	0.473481	1.8805	0.0376225
20536	Slc4a3	1.92331	0.725043	0.376977	1.65295	0.0376225
99526	Usp53	1.9233	0.707312	0.367759	1.63276	0.0376225
208606	Rsrc2	1.92221	0.779435	0.405488	1.71646	0.0376225
56207	Uchl5	1.92195	0.68906	0.358521	1.61223	0.0376225
74998	Rab11fip2	1.92132	0.553694	0.288183	1.46784	0.0376225
54132	Pdlim1	1.92084	0.946368	0.492685	1.92701	0.0376225
56531	Ylpm1	1.91621	0.72738	0.379592	1.65563	0.0376225
22137	Ttk	1.91304	0.70114	0.366505	1.62579	0.0376225
217935	Wdr60	1.9104	0.761221	0.398461	1.69492	0.0376225
56455	Dynll1	1.91016	0.664419	0.347834	1.58493	0.0376225
235442	Rab8b	1.90988	0.561706	0.294106	1.47601	0.0376225
12709	Ckb	1.90714	1.01343	0.531388	2.01871	0.0376225
224273	BC043118	1.90315	0.63913	0.335827	1.55739	0.0376225
20383	Sfrs3	1.90194	0.524275	0.275652	1.43821	0.0376225
11799	Birc5	1.90168	1.18511	0.623189	2.2738	0.0376225
17912	Myo1b	1.90117	0.9262	0.487174	1.90026	0.0376225
27224	Tceb3	1.90057	0.614329	0.323234	1.53085	0.0376225
217370	BC017643	1.8983	0.627902	0.330771	1.54532	0.0376225
54338	Slc23a2	1.89829	0.771668	0.406507	1.70724	0.0376225
70266	Ccbl1	1.89779	0.538658	0.283835	1.45262	0.0376225
12764	Cmas	1.89741	0.835531	0.440352	1.78451	0.0376225
68185	Chchd8	1.89589	0.613483	0.323585	1.52995	0.0376225
66442	Spc25	1.89546	1.01565	0.535833	2.02181	0.0376225
19177	Psmb7	1.89262	0.826975	0.436948	1.77396	0.0376225
116914	Slc19a2	1.89137	0.602442	0.318522	1.51828	0.0376225
17127	Smad3	1.89109	0.959797	0.507535	1.94504	0.0376225
433752	AA415398	1.88998	0.586018	0.310066	1.5011	0.0376225
27878	Tada1l	1.88914	0.527588	0.279275	1.44152	0.0376225
237926	Rsad1	1.88906	1.08169	0.57261	2.11652	0.0376225
69186	1810027O10Rik	1.88901	0.642318	0.340028	1.56084	0.0376225
66079	Tmem42	1.88786	0.629646	0.333523	1.54718	0.0376225
50493	Txnrd1	1.88753	0.831202	0.440366	1.77917	0.0376225
13139	Dgka	1.88696	1.27444	0.675393	2.41905	0.0376225
13669	Eif3s10	1.88453	0.717587	0.380777	1.64443	0.0376225
56722	Litaf	1.88414	0.691573	0.367051	1.61504	0.0376225
56438	Rbx1	1.8839	0.60289	0.320021	1.51876	0.0376225
227399	Hisppd1	1.88357	0.725419	0.385131	1.65338	0.0376225
20972	Syngr1	1.88324	0.526892	0.279779	1.44082	0.0376225
66618	2610209M04Rik	1.88168	0.825695	0.438808	1.77239	0.0376225
14874	Gstz1	1.88114	0.741738	0.394303	1.67219	0.0376225
103080	2011-09-10	1.87738	0.748343	0.39861	1.67986	0.0376225
229096	Ythdf3	1.87718	0.666754	0.35519	1.5875	0.0376225
56451	Suclg1	1.87685	0.906467	0.482972	1.87445	0.0376225
59002	Wdr8	1.87584	0.785821	0.418916	1.72407	0.0376225
56194	Prpf40a	1.87556	0.662124	0.353028	1.58241	0.0376225
14630	Gclm	1.87322	0.772503	0.412393	1.70823	0.0376225
231841	AA881470	1.87224	0.463434	0.24753	1.37882	0.0376225
66926	Trmt6	1.87189	1.00102	0.534766	2.00141	0.0376225
72567	Bclaf1	1.87095	0.553659	0.295925	1.4678	0.0376225
56349	Net1	1.86932	0.668335	0.357529	1.58924	0.0376225
69821	Mterfd2	1.86737	0.563839	0.301942	1.4782	0.0376225
76895	Bicd2	1.86716	0.610829	0.327143	1.52714	0.0376225
67544	4932442K08Rik	1.86662	0.556119	0.297928	1.47031	0.0376225
217684	4933426M11Rik	1.86628	0.662803	0.355147	1.58316	0.0376225
19682	Rdh5	1.86611	0.60284	0.323046	1.5187	0.0376225
16581	Kifc2	1.86448	0.922181	0.494604	1.89498	0.0376225
93696	Chrac1	1.86301	0.552557	0.296593	1.46668	0.0376225
320398	Lrig3	1.86187	0.837008	0.449551	1.78634	0.0376225
105171	Arrdc3	1.85319	1.02292	0.551975	2.03202	0.0376225
68598	Dnajc8	1.85233	0.920016	0.496679	1.89214	0.0376225
53413	Exoc7	1.84589	0.95537	0.517566	1.93908	0.0376225
69241	Polr2d	1.84143	1.19529	0.649113	2.28992	0.0376225
373864	Col27a1	1.84127	1.05165	0.571153	2.0729	0.0376225
71679	Atp5h	1.84111	0.788814	0.428445	1.72765	0.0376225
67706	1810059G22Rik	1.84042	0.677537	0.368142	1.59941	0.0376225
17184	Matr3	1.84021	0.578508	0.314371	1.4933	0.0376225
20874	Slk	1.83722	0.624495	0.339912	1.54167	0.0376225
170942	Erdr1	1.83603	0.767782	0.418174	1.70265	0.0376225
56753	Tacstd2	1.83447	1.32129	0.720257	2.4989	0.0376225
68365	Rab14	1.83167	0.594564	0.324602	1.51002	0.0376225

## Sheet: E8.25 vs E11.5 Canonical path
Current settings
Input parameters
Gene set (gmt) file										E:\manuscripts\Paper 2(resistance)\GSA\GSEA database\c2.cp.v3.0.symbols.gmt
Data type?										Two class unpaired
Arrays centered?										FALSE
False discovery rate (in each tail)										0.5
Test statistic										standard
Are data are log scale?										TRUE
Number of permutations										1000
Input percentile for exchangeability factor s0										Automatic choice
Number of neighbors for KNN										10
Minimum gene set size										15
Maximum gene set size										500
Seed for Random number generator										1234567
Computed values
Exchangibility factor s0										0.198942
s0 percentile										70
List of Significant Gene sets for FDR = 0.5
Positive gene sets(30)
	Gene_set	Gene_set_name	Score	p-value	FDR		Complete name
	4	KEGG_PENTOSE_AND_GLU	0.975	0	0		KEGG_PENTOSE_AND_GLUCURONATE_INTERCONVERSIONS
	8	KEGG_FATTY_ACID_META	0.6098	0	0		KEGG_FATTY_ACID_METABOLISM
	18	KEGG_VALINE_LEUCINE_	0.905	0	0		KEGG_VALINE_LEUCINE_AND_ISOLEUCINE_DEGRADATION
	26	KEGG_BETA_ALANINE_ME	0.6958	0	0		KEGG_BETA_ALANINE_METABOLISM
	53	KEGG_PROPANOATE_META	0.8229	0	0		KEGG_PROPANOATE_METABOLISM
	54	KEGG_BUTANOATE_METAB	0.8325	0	0		KEGG_BUTANOATE_METABOLISM
	149	KEGG_MATURITY_ONSET_	1.3686	0	0		KEGG_MATURITY_ONSET_DIABETES_OF_THE_YOUNG
	150	KEGG_ALDOSTERONE_REG	0.6116	0	0		KEGG_ALDOSTERONE_REGULATED_SODIUM_REABSORPTION
	179	KEGG_SYSTEMIC_LUPUS_	1.258	0	0		KEGG_SYSTEMIC_LUPUS_ERYTHEMATOSUS
	283	BIOCARTA_IL10_PATHWA	1.6022	0	0		BIOCARTA_IL10_PATHWAY
	339	BIOCARTA_CK1_PATHWAY	0.5852	0	0		BIOCARTA_CK1_PATHWAY
	375	BIOCARTA_HSP27_PATHW	0.8177	0	0		BIOCARTA_HSP27_PATHWAY
	386	BIOCARTA_LONGEVITY_P	0.7381	0	0		BIOCARTA_LONGEVITY_PATHWAY
	398	BIOCARTA_ARF_PATHWAY	0.3657	0	0		BIOCARTA_ARF_PATHWAY
	432	REACTOME_CAM_PATHWAY	0.3324	0	0		REACTOME_CAM_PATHWAY
	439	REACTOME_CELL_CELL_A	0.4212	0	0		REACTOME_CELL_CELL_ADHESION_SYSTEMS
	444	REACTOME_CENTROSOME_	0.1664	0	0		REACTOME_CENTROSOME_MATURATION
	523	REACTOME_GLUCAGON_SI	0.4641	0	0		REACTOME_GLUCAGON_SIGNALING_IN_METABOLIC_REGULATION
	536	REACTOME_GS_ALPHA_ME	0.5957	0	0		REACTOME_GS_ALPHA_MEDIATED_EVENTS_IN_GLUCAGON_SIGNALLING
	566	REACTOME_LOSS_OF_NLP	0.1501	0	0		REACTOME_LOSS_OF_NLP_FROM_MITOTIC_CENTROSOMES
	618	REACTOME_PACKAGING_O	1.5655	0	0		REACTOME_PACKAGING_OF_TELOMERE_ENDS
	630	REACTOME_PKA_ACTIVAT	0.8118	0	0		REACTOME_PKA_ACTIVATION
	670	REACTOME_RNA_POLYMER	1.1381	0	0		REACTOME_RNA_POLYMERASE_I_PROMOTER_CLEARANCE
	686	REACTOME_SEMA4D_IN_S	0.189	0	0		REACTOME_SEMA4D_IN_SEMAPHORIN_SIGNALING
	726	REACTOME_TIGHT_JUNCT	0.429	0	0		REACTOME_TIGHT_JUNCTION_INTERACTIONS
	786	REACTOME_ACTIVATION_	0.2761	0	0		REACTOME_ACTIVATION_OF_KAINATE_RECEPTORS_UPON_GLUTAMATE_BINDING
	796	REACTOME_G_BETA_GAMM	0.5148	0	0		REACTOME_G_BETA_GAMMA_SIGNALLING_THROUGH_PLC_BETA
	802	REACTOME_RNA_POLYMER	1.6129	0	0		REACTOME_RNA_POLYMERASE_I_PROMOTER_OPENING
	817	REACTOME_RNA_POLYMER	0.6611	0	0		REACTOME_RNA_POLYMERASE_I_III_AND_MITOCHONDRIAL_TRANSCRIPTION
	825	REACTOME_CELL_JUNCTI	0.5955	0	0		REACTOME_CELL_JUNCTION_ORGANIZATION
Negative gene sets(22)
	Gene_set	Gene_set_name	Score	p-value	FDR	Complete name
	15	KEGG_ALANINE_ASPARTA	-0.4788	0	0	KEGG_ALANINE_ASPARTATE_AND_GLUTAMATE_METABOLISM
	123	KEGG_NOD_LIKE_RECEPT	-0.285	0	0	KEGG_NOD_LIKE_RECEPTOR_SIGNALING_PATHWAY
	131	KEGG_FC_EPSILON_RI_S	-0.4445	0	0	KEGG_FC_EPSILON_RI_SIGNALING_PATHWAY
	133	KEGG_LEUKOCYTE_TRANS	-0.5629	0	0	KEGG_LEUKOCYTE_TRANSENDOTHELIAL_MIGRATION
	140	KEGG_TASTE_TRANSDUCT	-0.2537	0	0	KEGG_TASTE_TRANSDUCTION
	248	BIOCARTA_NDKDYNAMIN_	-0.2337	0	0	BIOCARTA_NDKDYNAMIN_PATHWAY
	451	REACTOME_CLASS_B2_SE	-0.7448	0	0	REACTOME_CLASS_B2_SECRETIN_FAMILY_RECEPTORS
	455	REACTOME_COLLAGEN_ME	-1.1744	0	0	REACTOME_COLLAGEN_MEDIATED_ACTIVATION_CASCADE
	482	REACTOME_E2F_MEDIATE	-0.5987	0	0	REACTOME_E2F_MEDIATED_REGULATION_OF_DNA_REPLICATION
	483	REACTOME_E2F_TRANSCR	-0.8051	0	0	REACTOME_E2F_TRANSCRIPTIONAL_TARGETS_AT_G1_S
	524	REACTOME_GLUCAGON_TY	-0.5659	0	0	REACTOME_GLUCAGON_TYPE_LIGAND_RECEPTORS
	526	REACTOME_GLUCOSE_AND	-0.5653	0	0	REACTOME_GLUCOSE_AND_OTHER_SUGAR_SLC_TRANSPORTERS
	545	REACTOME_HORMONE_BIO	-0.878	0	0	REACTOME_HORMONE_BIOSYNTHESIS
	573	REACTOME_METABOLISM_	-0.5278	0	0	REACTOME_METABOLISM_OF_CARBOHYDRATES
	577	REACTOME_METABOLISM_	-0.5819	0	0	REACTOME_METABOLISM_OF_VITAMINS_AND_COFACTORS
	611	REACTOME_P130CAS_LIN	-0.6478	0	0	REACTOME_P130CAS_LINKAGE_TO_MAPK_SIGNALING_FOR_INTEGRINS
	635	REACTOME_PLATELET_DE	-0.3088	0	0	REACTOME_PLATELET_DEGRANULATION
	706	REACTOME_SIGNALLING_	-0.3621	0	0	REACTOME_SIGNALLING_TO_RAS
	724	REACTOME_THE_ROLE_OF	-0.8084	0	0	REACTOME_THE_ROLE_OF_NEF_IN_HIV1_REPLICATION_AND_DISEASE_PATHOGENESIS
	768	REACTOME_GLUCOSE_TRA	-0.9305	0	0	REACTOME_GLUCOSE_TRANSPORT
	778	REACTOME_GAP_JUNCTIO	-0.9077	0	0	REACTOME_GAP_JUNCTION_TRAFFICKING
	803	REACTOME_GAP_JUNCTIO	-1.7695	0	0	REACTOME_GAP_JUNCTION_ASSEMBLY

## Sheet: E8.25 vs E11.5 Gene ontology
Current settings
Input parameters
Gene set (gmt) file										E:\manuscripts\Paper 2(resistance)\GSA\GSEA database\c5.all.v3.0.symbols.gmt
Data type?										Two class unpaired
Arrays centered?										FALSE
False discovery rate (in each tail)										0.5
Test statistic										standard
Are data are log scale?										TRUE
Number of permutations										1000
Input percentile for exchangeability factor s0										Automatic choice
Number of neighbors for KNN										10
Minimum gene set size										15
Maximum gene set size										500
Seed for Random number generator										1234567
Computed values
Exchangibility factor s0										0.157551
s0 percentile										54.9971
List of Significant Gene sets for FDR = 0.5
Positive gene sets(49)
	Gene_set	Gene_set_name	Score	p-value	FDR	Column B
	34	INTERMEDIATE_FILAMEN	0.8074	0	0	INTERMEDIATE_FILAMENT_CYTOSKELETON
	125	INTERMEDIATE_FILAMEN	0.8074	0	0	INTERMEDIATE_FILAMENT
	226	NEURON_PROJECTION	0.5263	0	0	NEURON_PROJECTION
	253	AXON_GUIDANCE	0.6237	0	0	AXON_GUIDANCE
	256	NEGATIVE_REGULATION_	0.3143	0	0	NEGATIVE_REGULATION_OF_NUCLEOBASENUCLEOSIDENUCLEOTIDE_AND_NUCLEIC_ACID_METABOLIC_PROCESS
	263	NEGATIVE_REGULATION_	0.2583	0	0	NEGATIVE_REGULATION_OF_CELLULAR_METABOLIC_PROCESS
	287	INORGANIC_ANION_TRAN	2.66	0	0	INORGANIC_ANION_TRANSPORT
	313	NEGATIVE_REGULATION_	0.3616	0	0	NEGATIVE_REGULATION_OF_TRANSPORT
	317	GLUTAMATE_SIGNALING_	0.951	0	0	GLUTAMATE_SIGNALING_PATHWAY
	319	TUBE_MORPHOGENESIS	0.8909	0	0	TUBE_MORPHOGENESIS
	421	NEGATIVE_REGULATION_	0.4068	0	0	NEGATIVE_REGULATION_OF_TRANSCRIPTION_DNA_DEPENDENT
	447	TISSUE_DEVELOPMENT	0.5541	0	0	TISSUE_DEVELOPMENT
	465	TUBE_DEVELOPMENT	0.8909	0	0	TUBE_DEVELOPMENT
	545	BRAIN_DEVELOPMENT	0.6994	0	0	BRAIN_DEVELOPMENT
	560	REGULATION_OF_TRANSC	0.2704	0	0	REGULATION_OF_TRANSCRIPTION_FROM_RNA_POLYMERASE_II_PROMOTER
	576	ANION_TRANSPORT	0.6696	0	0	ANION_TRANSPORT
	583	ELECTRON_TRANSPORT_G	0.2962	0	0	ELECTRON_TRANSPORT_GO_0006118
	629	MORPHOGENESIS_OF_AN_	0.7642	0	0	MORPHOGENESIS_OF_AN_EPITHELIUM
	703	REGULATION_OF_TRANSC	0.2077	0	0	REGULATION_OF_TRANSCRIPTIONDNA_DEPENDENT
	727	EPIDERMIS_DEVELOPMEN	0.8078	0	0	EPIDERMIS_DEVELOPMENT
	730	NEGATIVE_REGULATION_	0.337	0	0	NEGATIVE_REGULATION_OF_TRANSCRIPTION
	732	SODIUM_ION_TRANSPORT	3.5954	0	0	SODIUM_ION_TRANSPORT
	753	NEGATIVE_REGULATION_	0.4585	0	0	NEGATIVE_REGULATION_OF_TRANSCRIPTION_FROM_RNA_POLYMERASE_II_PROMOTER
	784	EXOCYTOSIS	0.9808	0	0	EXOCYTOSIS
	793	BONE_REMODELING	0.7443	0	0	BONE_REMODELING
	804	NEGATIVE_REGULATION_	0.4068	0	0	NEGATIVE_REGULATION_OF_RNA_METABOLIC_PROCESS
	841	NEGATIVE_REGULATION_	0.2536	0	0	NEGATIVE_REGULATION_OF_METABOLIC_PROCESS
	928	REGULATION_OF_RNA_ME	0.2007	0	0	REGULATION_OF_RNA_METABOLIC_PROCESS
	936	TISSUE_REMODELING	0.7841	0	0	TISSUE_REMODELING
	944	TRANSCRIPTION_FROM_R	0.236	0	0	TRANSCRIPTION_FROM_RNA_POLYMERASE_II_PROMOTER
	962	HORMONE_METABOLIC_PR	0.791	0	0	HORMONE_METABOLIC_PROCESS
	1022	CENTRAL_NERVOUS_SYST	0.4394	0	0	CENTRAL_NERVOUS_SYSTEM_DEVELOPMENT
	1036	RESPONSE_TO_ORGANIC_	0.4939	0	0	RESPONSE_TO_ORGANIC_SUBSTANCE
	1049	ECTODERM_DEVELOPMENT	0.7564	0	0	ECTODERM_DEVELOPMENT
	1091	PHOSPHORIC_MONOESTER	0.209	0	0	PHOSPHORIC_MONOESTER_HYDROLASE_ACTIVITY
	1131	RNA_POLYMERASE_II_TR	0.2833	0	0	RNA_POLYMERASE_II_TRANSCRIPTION_FACTOR_ACTIVITY
	1228	KINASE_REGULATOR_ACT	0.4784	0	0	KINASE_REGULATOR_ACTIVITY
	1238	OXYGEN_BINDING	1.5525	0	0	OXYGEN_BINDING
	1250	ANION_CHANNEL_ACTIVI	1.2889	0	0	ANION_CHANNEL_ACTIVITY
	1272	TRANSCRIPTION_COREPR	0.3466	0	0	TRANSCRIPTION_COREPRESSOR_ACTIVITY
	1289	TRANSCRIPTION_REPRES	0.3334	0	0	TRANSCRIPTION_REPRESSOR_ACTIVITY
	1326	PROTEIN_KINASE_REGUL	0.477	0	0	PROTEIN_KINASE_REGULATOR_ACTIVITY
	1338	TRANSMEMBRANE_RECEPT	1.7555	0	0	TRANSMEMBRANE_RECEPTOR_PROTEIN_PHOSPHATASE_ACTIVITY
	1354	PHOSPHOPROTEIN_PHOSP	0.2525	0	0	PHOSPHOPROTEIN_PHOSPHATASE_ACTIVITY
	1362	CHLORIDE_CHANNEL_ACT	1.2889	0	0	CHLORIDE_CHANNEL_ACTIVITY
	1364	CARBOXYLESTERASE_ACT	0.7937	0	0	CARBOXYLESTERASE_ACTIVITY
	1368	INTERLEUKIN_RECEPTOR	0.9547	0	0	INTERLEUKIN_RECEPTOR_ACTIVITY
	1416	PHOSPHATASE_REGULATO	0.4644	0	0	PHOSPHATASE_REGULATOR_ACTIVITY
	1052	REGULATION_OF_MEMBRA	0.486	0.015	0.3171	REGULATION_OF_MEMBRANE_POTENTIAL
Negative gene sets(40)
	Gene_set	Gene_set_name	Score	p-value	FDR		Column B
	17	ADHERENS_JUNCTION	-0.7422	0	0		ADHERENS_JUNCTION
	51	GOLGI_APPARATUS	-0.1241	0	0		GOLGI_APPARATUS
	89	SYNAPTIC_VESICLE	-0.9022	0	0		SYNAPTIC_VESICLE
	250	ACTIN_FILAMENT_ORGAN	-0.9386	0	0		ACTIN_FILAMENT_ORGANIZATION
	265	PROTEIN_AUTOPROCESSI	-0.4892	0	0		PROTEIN_AUTOPROCESSING
	268	NEGATIVE_REGULATION_	-0.6452	0	0		NEGATIVE_REGULATION_OF_MULTICELLULAR_ORGANISMAL_PROCESS
	277	GLUCOSE_METABOLIC_PR	-0.5675	0	0		GLUCOSE_METABOLIC_PROCESS
	283	ONE_CARBON_COMPOUND_	-0.3212	0	0		ONE_CARBON_COMPOUND_METABOLIC_PROCESS
	304	HORMONE_SECRETION	-2.3105	0	0		HORMONE_SECRETION
	354	PATTERN_SPECIFICATIO	-0.5798	0	0		PATTERN_SPECIFICATION_PROCESS
	369	STRIATED_MUSCLE_DEVE	-0.3908	0	0		STRIATED_MUSCLE_DEVELOPMENT
	376	MYOBLAST_DIFFERENTIA	-1.3414	0	0		MYOBLAST_DIFFERENTIATION
	400	NEGATIVE_REGULATION_	-0.1565	0	0		NEGATIVE_REGULATION_OF_CELL_CYCLE
	448	CARBOHYDRATE_TRANSPO	-1.8454	0	0		CARBOHYDRATE_TRANSPORT
	450	MUSCLE_CELL_DIFFEREN	-1.3414	0	0		MUSCLE_CELL_DIFFERENTIATION
	519	MESODERM_DEVELOPMENT	-0.7809	0	0		MESODERM_DEVELOPMENT
	556	AMINO_ACID_CATABOLIC	-0.757	0	0		AMINO_ACID_CATABOLIC_PROCESS
	580	ALCOHOL_METABOLIC_PR	-0.2133	0	0		ALCOHOL_METABOLIC_PROCESS
	614	REGULATION_OF_CELL_D	-0.4361	0	0		REGULATION_OF_CELL_DIFFERENTIATION
	631	AMINE_CATABOLIC_PROC	-0.7601	0	0		AMINE_CATABOLIC_PROCESS
	673	RESPONSE_TO_TEMPERAT	-0.5008	0	0		RESPONSE_TO_TEMPERATURE_STIMULUS
	696	NEGATIVE_REGULATION_	-0.8708	0	0		NEGATIVE_REGULATION_OF_CELL_DIFFERENTIATION
	713	AMINE_BIOSYNTHETIC_P	-0.9898	0	0		AMINE_BIOSYNTHETIC_PROCESS
	744	GENERATION_OF_A_SIGN	-0.8276	0	0		GENERATION_OF_A_SIGNAL_INVOLVED_IN_CELL_CELL_SIGNALING
	790	SKELETAL_MUSCLE_DEVE	-0.615	0	0		SKELETAL_MUSCLE_DEVELOPMENT
	801	REGULATION_OF_BLOOD_	-0.7958	0	0		REGULATION_OF_BLOOD_PRESSURE
	901	HETEROCYCLE_METABOLI	-0.365	0	0		HETEROCYCLE_METABOLIC_PROCESS
	1045	NITROGEN_COMPOUND_CA	-0.6887	0	0		NITROGEN_COMPOUND_CATABOLIC_PROCESS
	1074	G_PROTEIN_COUPLED_RE	-0.8738	0	0		G_PROTEIN_COUPLED_RECEPTOR_BINDING
	1119	PROTEIN_HOMODIMERIZA	-0.2645	0	0		PROTEIN_HOMODIMERIZATION_ACTIVITY
	1144	RECEPTOR_SIGNALING_P	-0.6614	0	0		RECEPTOR_SIGNALING_PROTEIN_SERINE_THREONINE_KINASE_ACTIVITY
	1169	PHOSPHOLIPID_BINDING	-0.3649	0	0		PHOSPHOLIPID_BINDING
	1248	INTRAMOLECULAR_OXIDO	-1.1249	0	0		INTRAMOLECULAR_OXIDOREDUCTASE_ACTIVITY
	1262	TRANSCRIPTION_COACTI	-0.1324	0	0		TRANSCRIPTION_COACTIVATOR_ACTIVITY
	1266	CARBOHYDRATE_TRANSME	-1.5122	0	0		CARBOHYDRATE_TRANSMEMBRANE_TRANSPORTER_ACTIVITY
	1292	SEQUENCE_SPECIFIC_DN	-0.3534	0	0		SEQUENCE_SPECIFIC_DNA_BINDING
	1371	TRANSMEMBRANE_RECEPT	-0.6781	0	0		TRANSMEMBRANE_RECEPTOR_PROTEIN_TYROSINE_KINASE_ACTIVITY
	1381	TRANSFERASE_ACTIVITY	-0.052	0	0		TRANSFERASE_ACTIVITY_TRANSFERRING_PHOSPHORUS_CONTAINING_GROUPS
	1388	PROTEIN_DIMERIZATION	-0.2482	0	0		PROTEIN_DIMERIZATION_ACTIVITY
	1446	ISOMERASE_ACTIVITY	-0.5412	0	0		ISOMERASE_ACTIVITY

## Sheet: E8.25 vs E11.5 Transcription fa
Current settings
Input parameters
Gene set (gmt) file								E:\manuscripts\Paper 2(resistance)\GSA\GSEA database\c3.tft.v3.0.symbols.gmt
Data type?								Two class unpaired
Arrays centered?								FALSE
False discovery rate (in each tail)								0.5
Test statistic								standard
Are data are log scale?								TRUE
Number of permutations								1000
Input percentile for exchangeability factor s0								Automatic choice
Number of neighbors for KNN								10
Minimum gene set size								15
Maximum gene set size								500
Seed for Random number generator								1234567
Computed values
Exchangibility factor s0								0.160694
s0 percentile								54.9908
List of Significant Gene sets for FDR = 0.5
Positive gene sets(17)
	Gene_set	Gene_set_name	Score	p-value	FDR
	3	V$MYOD_01	0.1094	0	0
	106	AGCYRWTTC_UNKNOWN	0.3517	0	0
	115	V$SRY_02	0.2131	0	0
	142	V$SP1_Q6	0.0862	0	0
	145	V$GATA_C	0.2922	0	0
	165	V$MEF2_04	0.9956	0	0
	201	V$FREAC3_01	0.2116	0	0
	288	V$CDC5_01	0.4315	0	0
	379	V$HP1SITEFACTOR_Q6	0.2997	0	0
	383	V$CDX2_Q5	0.2549	0	0
	444	V$CEBP_Q2_01	0.1905	0	0
	461	V$MYOD_Q6_01	0.3111	0	0
	462	V$OCT1_Q5_01	0.4009	0	0
	481	V$VDR_Q6	0.2416	0	0
	502	RAAGNYNNCTTY_UNKNOWN	0.3904	0	0
	534	WGTTNNNNNAAA_UNKNOWN	0.1383	0	0
	563	TTGCWCAAY_V$CEBPB_02	0.5207	0	0
Negative gene sets(33)
	Gene_set	Gene_set_name	Score	p-value	FDR
	30	V$NFKAPPAB_01	-0.2289	0	0
	35	V$YY1_01	-0.0692	0	0
	44	V$E47_02	-0.2779	0	0
	50	V$EVI1_02	-0.2537	0	0
	52	V$EVI1_03	-0.524	0	0
	67	V$CDP_02	-0.5543	0	0
	69	V$CDPCR3_01	-0.6207	0	0
	87	V$GATA1_03	-0.1617	0	0
	93	V$TST1_01	-0.1276	0	0
	105	V$HSF1_01	-0.1977	0	0
	122	V$AP4_Q5	-0.245	0	0
	123	V$AP4_Q6	-0.2639	0	0
	126	V$CREBP1_Q2	-0.1052	0	0
	162	V$STAT3_01	-0.7148	0	0
	188	V$AML1_01	-0.1345	0	0
	190	V$LMO2COM_01	-0.2334	0	0
	191	V$LMO2COM_02	-0.4206	0	0
	208	V$PAX3_B	-0.3202	0	0
	224	V$MSX1_01	-0.2421	0	0
	242	V$MEIS1AHOXA9_01	-0.4283	0	0
	243	V$MEIS1BHOXA9_01	-0.3045	0	0
	269	V$STAT5B_01	-0.2397	0	0
	270	V$STAT5A_02	-0.3305	0	0
	289	V$AR_01	-0.3408	0	0
	400	V$AML1_Q6	-0.1345	0	0
	420	V$GATA_Q6	-0.4213	0	0
	483	V$T3R_Q6	-0.1952	0	0
	484	V$PXR_Q2	-0.2826	0	0
	486	V$DR3_Q4	-0.2264	0	0
	516	SYATTGTG_UNKNOWN	-0.0679	0	0
	523	TGCTGAY_UNKNOWN	-0.0901	0	0
	529	TTANWNANTGGM_UNKNOWN	-0.7184	0	0
	611	TTCYNRGAA_V$STAT5B_0	-0.2222	0	0

## Sheet: Fisher exact test
Knowledge-based geneset	No. of genes in the geneset	No. of genes in array dataset	No. of differentially expressed genes	p- value
Basal lamina genes	40	19	10	0.122
Basal layer genes	14	11	6	0.185
Spinous layer genes	11	7	5	0.07
Granulous layer genes	16	5	2	0.609
Keratinized layer genes	39	7	3	0.514
EDC genes	58	6	3	0.394
Nrf2/Keap1 pathway genes	281	153	62	0.373
P63 target genes	60	21	12	0.048
Pax9 target genes	23	3	2	0.31
Sox2 target genes	140	28	11	0.472
