# Supplementary material for: Transcript Profiling Identifies Dynamic Gene Expression Patterns and an Important Role for Nrf2/Keap1 Pathway in the Developing Mouse Esophagus
Source: PLoS One. 2012 May 2;7(5):e36504. doi: 10.1371/journal.pone.0036504 (PMC3342176; doi:10.1371/journal.pone.0036504)
Supplement: Excel S4 — Dynamic expression of eighteen gene expression patterns and nine knowledge-based gene sets in the metaplasia phase. (XLSX) [file pone.0036504.s010.xlsx]

## Sheet: Genes of Pattern 18
Gene (5)
Tex15
Lefty1
Igh-6
Agpat5
1700025G04Rik

## Sheet: Genes of Pattern 17
Gene (5)
Plxna2
Lhx6
Hoxb6
Hoxa5
H2-Bl

## Sheet: Genes of Pattern 16
Gene (7)
Zeb2
Pde1c
Lin7b
Ddr2
Cxcl14
AI256396
6430514L14Rik

## Sheet: Genes of Pattern 15
Gene (13)
Tmem87a
Tlr1
Tg
Ppil6
Pi4k2b
Gcnt1
Foxj1
Dynlrb2
Col25a1
Ccdc78
BC007180
4833436C18Rik
1600014C10Rik

## Sheet: Genes of Pattern 14
Gene (16)
Styk1
Slc39a4
Sh3yl1
Nat5
Mut
Msx2
Lrrc20
Isoc2b
H2-Eb1
Gdf9
Cxcr6
B930095G15Rik
8430419K02Rik
6720422M22Rik
4633401B06Rik
3110045C21Rik

## Sheet: Genes of Pattern 13
Gene (33)
Ttll6
Tnn
Tnmd
Sv2b
Stk33
St8sia3
Serpina6
Rgs17
Myt1l
Mapk10
Lrrn3
Lrrc46
Kif6
Iqca
Hs3st3a1
Fstl5
EG620393
D11Bwg0517e
Chrna5
Ccno
Ccna1
Ccdc67
Ccdc36
Cbln2
C630007B19Rik
Ascl1
9030205A07Rik
6330407J23Rik
4930451C15Rik
4833446K15Rik
1700112E06Rik
1700041C02Rik
1700003E16Rik

## Sheet: Genes of Pattern 12
Gene (18)
Zfp566
Wdhd1
Tln2
Tle2
Slc38a5
Sec1
Mtx3
Mtap
Lrrc3b
LOC100042834
Hist1h3a
Edil3
Cep135
C630013B14Rik
BC067047
BC030867
Akr1c18
9430010O03Rik

## Sheet: Genes of Pattern 11
Gene (65)
Zmynd10
Ulk4
Ttc25
Ttc18
Thbs1
Tekt4
Tekt1
Sparc
Spag6
Sec14l3
Rtdr1
Rsph1
Prokr1
Pkib
Nppa
Nme5
Nek5
Morn3
Mdh1b
Kera
Kcnt2
Iqub
Hdc
Grik1
Fsip1
Fank1
Efhc1
Dpp10
Cga
Cdca7l
Ccdc96
Ccdc81
Ccdc65
Ccdc19
Ccdc13
Ccdc113
Ccdc103
C330001K17Rik
BC060267
BC050789
Armc3
Angpt1
Amigo2
Ak7
A930038C07Rik
6820408C15Rik
4930579J09Rik
4930444P10Rik
4930434E21Rik
4930418G15Rik
4833427G06Rik
3110079O15Rik
3100002J23Rik
1700129I04Rik
1700120B06Rik
1700094D03Rik
1700026L06Rik
1700026D08Rik
1700016K19Rik
1700013F07Rik
1700010I14Rik
1700007K13Rik
1700007G11Rik
1700001L19Rik
1190002A17Rik

## Sheet: Genes of Pattern 10
Gene (37)
Wfdc15a
Vnn1
Txnip
Trim14
Tlr2
Tgfbr3
Steap4
Slc30a1
Slc1a1
Sat1
RP23-136K12.4
Rdh10
Piwil4
Pcsk6
Parp14
Lrrc15
Lbp
Irf9
Ifit1
Ifi44
Fndc7
Flt3l
Fcgr3
Faim3
Egfl6
Dpep1
Cxcl2
Cflar
BC064033
AY026312
Ankrd2
Abca5
9330154J02Rik
4833442J19Rik
2310047D13Rik
1700016M24Rik
1300014I06Rik

## Sheet: Genes of Pattern 9
Gene (18)
Xpo5
Nup54
Lrp6
LOC666581
Limd2
Hddc3
Gpr173
Fgf10
Eny2
Dhx40
Cuedc1
Cep78
BC020077
Atp10d
Adi1
6430510M02Rik
6330514A18Rik
1700001P01Rik

[truncated: 17 more sheets: Genes of Pattern 8, Genes of Pattern 7, Genes of Pattern 6, Genes of Pattern 5, Genes of Pattern 4, Genes of Pattern 3, Genes of Pattern 2, Genes of Pattern 1, Basal lamina, Basal layer, Granular layer, Keratinized layer, EDC, Nrf2-Keap1 pathway, P63 target genes, Pax9 target genes, Sox2 target genes]
