# Supplementary material for: Transcript Profiling Identifies Dynamic Gene Expression Patterns and an Important Role for Nrf2/Keap1 Pathway in the Developing Mouse Esophagus
Source: PLoS One. 2012 May 2;7(5):e36504. doi: 10.1371/journal.pone.0036504 (PMC3342176; doi:10.1371/journal.pone.0036504)
Supplement: Excel S6 — Differential gene expression at P7 between wild-type mice, Nrf2 −/− mice, Keap1 −/− mice, and Nrf2 −/− Keap1 −/− mice: (1) Raw gene expression array data after data pre-processing (wild-type P7, Nrf2 −/− P7, Keap1 −/− P7, Nrf2 −/− Keap1 −/− P7); (2) SAM analysis of differentially expressed genes (wild-type P7 vs Nrf2 −/− P7 vs Keap1 −/− P7 vs Nrf2 −/− Keap1 −/− P7); (3) GSA analysis of differentially expressed gene sets (wild-type P7 vs Keap1 −/− P7). (XLSX) [file pone.0036504.s012.xlsx]

## Sheet: Samples
Samples
35A	Wild-type	P7 esophagus
35B	Nrf2-/-	P7 esophagus
35C	Keap1-/-	P7 esophagus
35D	Nrf2-/-Keap1-/-	P7 esophagus

## Sheet: raw-data-for-sam
Entrez Gene ID	35A1	35A2	35A3	35B1	35B2	35B3	35C1	35C2	35C3	35D1	35D2	35D3
16656	-0.247432	-0.604068	-0.647601	-0.225297	-0.362976	-0.441725	-0.221274	-0.180542	-0.500379	-1.25358	-0.72871	-0.295204
69674	0.233565	0.221492	0.148883	0.330958	0.320488	0.38826	-0.170815	0.109226	0.108254	0.645373	0.375701	0.563252
16924	1.22606	1.27577	1.0823	0.85045	0.809297	0.784863	0.915236	2.06735	1.96201	0.944077	1.80541	1.16275
432536	-1.15872	-0.579099	-0.0273648	-0.30304	-0.204502	-0.410026	0.0660225	0.100942	0.123763	-0.477547	-0.135382	-0.465477
69886	-0.342838	-0.826653	-0.438896	-0.390546	-0.30581	-0.72726	-0.707953	-0.665293	-0.706739	-0.447157	-0.802875	-0.415104
70285	-0.446773	-0.586946	-0.464127	-0.595209	-0.4954	-0.531548	-0.537194	-0.709579	-0.776369	-0.449381	-0.750005	-0.436034
17427	-0.404249	-0.684684	-0.655685	-0.535184	-0.950741	-0.904116	-0.883291	-1.39712	-1.34417	-0.889932	-1.0944	-1.1118
26896	0.976758	1.31786	0.941204	1.05511	1.28761	1.02297	0.194909	0.0601611	0.261125	1.34284	1.13792	1.24718
70572	-0.438772	-0.270191	-0.573654	-0.601718	-0.300744	-0.345509	-0.120438	-0.300495	-0.272498	-0.372759	-0.464356	-0.427875
22192	0.364261	0.216356	0.486314	0.527184	0.612471	0.494489	0.601852	0.59796	0.739043	0.138021	0.395528	0.278046
20807	0.245923	0.0141035	0.165418	0.659528	0.139582	0.269812	0.389793	0.418906	0.129008	0.374093	0.311449	0.257045
20908	0.375812	-0.0575944	0.0527368	-0.18299	-0.118391	-0.669911	-0.20549	-0.234864	-0.379476	-0.312259	0.102536	-0.16821
21354	-0.995691	-0.551276	-0.687285	-0.0831898	-0.620587	-0.733067	-1.39295	-1.6195	-1.66574	-0.900772	-0.893931	-0.694635
100044278	0.88318	0.228722	0.75381	0.358037	0.91567	0.0465869	0.18117	-0.145655	-0.787763	-0.0595093	0.507144	0.350715
52013	-0.014584	0.0258749	0.287898	0.365189	0.345453	0.0589278	0.224351	-0.02841	0.226943	0.20056	0.386716	0.120544
232717	0.167454	0.153372	0.0110325	0.207352	0.106657	-0.212572	0.416699	0.0429566	0.0719831	-0.0113313	0.132643	-0.151182
26406	-0.140329	-0.293734	-0.125104	-0.345708	-0.13214	-0.407122	-0.093614	-0.0685537	0.178834	-0.268528	-0.125102	-0.0859114
26406	0.216437	-0.0611614	0.378287	0.052047	0.250658	-0.0064063	0.0444324	0.207992	0.371267	0.11319	0.00560607	0.341898
28194	-0.230983	0.204941	-0.409501	-0.4889	-0.472244	2.48863	-0.359239	-0.473814	-0.701042	-0.449381	-0.569363	-0.323583
67911	0.215706	0.394709	0.0799273	0.196685	-0.108984	0.14604	0.355266	0.102854	0.621304	-0.0965694	-0.113353	0.189362
66354	-0.064541	0.100783	0.229842	0.25671	0.0842245	-0.0683528	-0.0890342	-0.0927674	-0.238949	0.0612241	-0.0302705	-0.0482083
11757	-0.572396	-0.698952	-0.556477	-0.614012	-0.523621	-0.381796	-0.439711	-0.621645	-0.39087	-0.390332	-0.547058	-0.652067
215900	-0.806342	-0.656861	-1.08706	-0.917753	-1.01279	-0.968996	-0.715149	-1.50035	-1.53977	-0.463464	-0.620765	-0.628654
14268	-1.27935	-1.40666	-1.52358	-1.38783	-1.31093	-0.913099	-1.5696	-1.42325	-1.3005	-1.48632	-1.62384	-1.53464
674583	0.343035	-0.024064	0.226021	0.446186	0.283945	0.271264	0.539698	0.0684447	0.223967	0.329028	0.299455	0.381628
381286	3.20362	3.80339	2.92243	2.70254	2.83328	1.39828	3.33857	3.9095	4.0946	1.76088	3.29607	2.90379
381286	0.520565	1.61536	1.78705	1.011	1.30209	0.189596	2.9578	2.91419	3.60085	1.07749	2.01837	1.65158
68870	-1.40802	-0.566257	-0.771061	-0.807828	-0.758148	-0.54868	-0.793005	-0.951716	-0.930189	-0.648023	-0.571566	-0.488889
69171	0.00430218	0.115765	-0.103057	-0.137326	-0.22925	-0.219105	-0.144645	0.0110965	0.0218492	-0.141227	-0.0058982	-0.0698977
69256	-0.367695	-0.460672	-0.0001744	-0.214811	-0.317388	-0.28444	-0.412233	-0.388429	-0.521268	-0.205526	-0.262419	-0.310103
217125	0.168551	0.215642	0.0146281	0.0471654	0.0960092	-0.0542143	-0.318021	-0.147567	-0.125641	-0.339683	-0.166748	0.117706
18788	3.18973	3.54014	3.15245	3.21384	3.45198	3.26684	0.933555	2.24067	2.19685	3.62278	3.23084	3.52315
19186	-0.31524	-0.31585	-0.218188	-0.273389	-0.228623	-0.27355	-0.488125	-0.645222	-0.435813	-0.0612388	-0.294729	-0.233481
229004	-0.837778	-0.717501	-0.898929	-0.778177	-1.01134	-1.03433	-0.836185	-0.991222	-0.78713	-1.1046	-0.761019	-0.788994
71743	-0.286545	-0.151051	-0.400682	-0.455633	-0.30581	-0.334218	0.191638	0.195885	0.188962	-0.351225	-0.447467	-0.391692
71974	-0.494902	-0.588373	-0.5043	-0.511138	-0.448364	-0.476086	0.0359271	-0.1036	-0.132604	-0.57242	-0.573035	-0.804602
102502	0.761638	0.245427	1.25941	0.709428	0.440248	1.01789	-0.215304	0.23794	0.176935	0.55264	1.05788	0.21171
20440	0.0965399	-0.330831	-0.151559	-0.256032	-0.351398	-0.0151176	0.0849957	-0.251431	0.180733	-0.4983	-0.564957	-0.0405055
20562	0.614874	0.603739	0.621532	0.308057	0.645758	0.588135	0.766722	0.687168	0.59725	0.442284	0.408745	0.329127
234729	-0.39182	-0.0426127	-0.380106	-0.399224	-0.510596	-0.356307	-0.20549	-0.605715	-0.39087	-0.493112	-0.3476	-0.566221
50765	-1.38682	0.714318	-0.848223	-0.765159	-0.352845	-0.319647	-0.594768	0.251959	0.147817	-0.587244	-0.418094	-0.828015
53417	0.152102	0.0358626	-0.14862	-0.155509	0.00173114	-0.143608	0.0391984	0.222648	0.0832506	0.188052	-0.123633	-0.0341203
74764	-0.0270123	-0.0283445	-0.343362	-0.0833103	-0.0742496	-0.0281844	0.0535918	0.0811887	0.12946	-0.281128	0.0951926	-0.0759789
55988	-0.622841	-0.975756	-0.477845	-0.836755	-0.594537	-0.90584	-0.650379	-0.717863	-0.752948	-0.71399	-0.996735	-0.725851
66548	-0.655008	-1.17979	-0.549863	-0.925708	-0.623482	-1.02997	-0.164927	-0.254617	-0.0306902	-0.712507	-0.918897	-0.418652
12912	0.219361	0.690775	0.109322	0.550326	0.482219	0.582327	0.249212	0.16976	0.421275	0.507509	0.593793	0.558285
66874	0.364845	0.19638	0.531877	0.365189	0.48656	0.5032	0.425205	0.445031	0.309233	0.606089	0.446195	0.36602
67120	-1.31444	-0.976469	-1.2965	-1.43266	-1.60906	-1.14104	-1.15991	-1.08744	-0.99982	-1.12536	-1.03565	-1.11748
12628	-1.15141	-1.31177	-0.535165	-0.397055	-0.652861	-0.378246	-2.09103	-2.05344	-2.43167	-0.132147	-0.577441	-0.583958
83797	-0.366233	-0.287313	-0.565295	-0.626306	-0.557631	-0.534887	-0.375595	-0.482735	-0.154759	-1.05049	-0.638389	-0.765582
67345	-0.119311	-0.111814	-0.0157701	-0.179535	-0.0320725	-0.080348	-0.0811832	0.30782	0.0604624	-0.219609	-0.118677	-0.0263161
12950	0.523489	0.174354	0.763363	0.506934	0.00607289	0.712995	0.101352	0.530416	0.229475	0.802507	0.891191	0.447608
13383	-0.222941	-0.424288	-0.161847	-0.579299	-0.294232	-0.43979	-0.418121	-0.0615445	-0.0268922	-0.421215	-0.526773	-0.630073
67738	-0.0277434	-0.382732	0.0556763	-0.214087	-0.224764	-0.269195	-0.548971	-0.912209	-0.626166	0.00126916	-0.30266	-0.187365
259107	-0.0621041	-0.597647	-0.2978	-0.116547	-0.159017	-0.699674	-0.335686	0.194611	0.640927	-0.612445	0.117956	-0.338482
100048056	-0.449993	-0.389331	-0.23607	-0.611843	-0.375278	-0.576991	-0.642528	-0.780946	-0.672556	-0.385638	-0.741193	-0.606661
14179	0.0877669	0.298398	0.131369	0.167034	0.250658	0.291953	0.373519	0.0423194	0.111103	0.314797	0.527705	0.402202
216613	0.50375	0.878402	0.346688	0.32686	0.266578	0.41028	0.361743	0.326512	0.35291	0.507509	0.377537	0.109192
209047	-0.557775	-0.362578	-0.395538	0.0175748	-0.019254	-0.309121	-0.744591	-0.0010103	-0.228821	-0.0128137	-0.231578	-0.139831
269536	-0.508062	-0.282533	-0.579772	-0.911967	-0.393188	-0.280538	-0.995167	-0.780308	-0.386692	-0.340589	-0.348334	-0.24838
17869	-1.21355	-0.957207	-1.11792	-1.39506	-1.18936	-1.22525	-0.60131	-0.563022	-0.490251	-0.900772	-1.10982	-1.21538
17928	3.14367	3.07357	3.10762	2.95855	3.04385	3.13036	2.85966	2.5529	2.67477	2.87194	2.79674	2.95629
70790	-0.629664	-0.420008	-0.886436	-0.854112	-0.843464	-0.6808	-0.642528	-0.807071	-0.792194	-0.760685	-0.376238	-0.842204
18555	0.0475576	0.376517	0.279896	0.260429	0.317439	0.254516	0.736627	0.733684	0.886533	0.271313	0.195794	0.473859
72766	-0.199273	-0.10896	-0.280081	-0.0201516	0.0509377	-0.0051619	-0.0554713	0.0323631	0.464319	-0.169842	-0.0604823	-0.0483096
21961	0.490591	0.918353	0.117406	0.262496	-0.430563	-0.215476	-0.260447	-0.12399	0.16111	-0.396756	0.34486	-0.471152
17355	0.133094	-0.16746	-0.233865	0.0216729	0.407685	0.202663	0.225005	0.311856	0.256061	0.056118	-0.0303754	0.143247
75974	-0.570934	-0.276612	-0.538105	-0.870745	-1.2581	-0.648859	-1.08938	-0.799424	-0.87132	-0.803675	-0.211017	-1.03589
22367	-1.02201	-1.24614	-0.956985	-1.20631	-0.988912	-1.21291	-1.03442	-1.49716	-1.5442	-0.96887	-1.2956	-1.39843
226470	-0.845089	-0.736049	-0.555007	-0.615459	-0.574999	-0.52182	-0.714495	-0.62738	-0.614953	-0.522019	-0.53485	-0.676189
56708	-1.22379	-1.21332	-1.45597	-1.29454	-1.4846	-1.41036	-0.791696	-0.949804	-0.670024	-1.56637	-1.42631	-0.98126
57340	0.955557	0.358325	0.768507	0.85262	0.91567	0.381243	0.147804	0.197159	0.249731	0.609795	0.529173	0.436257
57757	-2.42275	-0.19671	-2.25331	-2.61074	-1.30514	-1.90473	-2.50844	-1.83743	-1.82336	-1.8043	-2.09821	-2.43638
58178	-1.24937	-1.05209	-0.83426	-0.81289	-0.904248	-1.0532	-0.413607	-0.589148	-0.482022	-0.339683	-1.00848	-0.478247
75624	-0.336624	-0.208124	-0.125838	-0.350047	-0.0662897	-0.14264	-0.0342082	-0.0335076	-0.0192961	-0.0702567	-0.164939	0.0219277
77573	-0.535112	-0.456392	-0.598365	-0.247354	-0.319559	-0.244513	0.0771447	0.107314	0.0364083	-0.299658	-0.258013	-0.12777
75667	1.76413	0.569495	2.14567	1.91571	2.13715	1.95289	2.51291	2.22601	1.86579	2.57472	2.43693	2.48591
66226	0.323174	0.439654	0.341544	0.319628	0.463404	0.276708	0.0908839	0.150007	0.0446373	0.71134	0.358078	0.505075
67881	-0.138867	-0.254496	-0.350711	-0.330521	-0.242131	-0.192972	-0.266335	-0.300495	-0.257306	-0.0639565	-0.21322	-0.0823641
654802	-0.256571	-0.170314	-0.253707	-0.177205	0.0885662	-0.0078582	-0.282692	-0.39735	-0.592165	0.133944	-0.0648882	-0.453416
12040	-0.631614	-0.747464	-0.768121	-1.02695	-0.843464	-0.713144	-0.754404	-0.944069	-1.10237	-0.344872	-0.744865	-0.799636
12262	2.69479	2.99153	2.83131	2.75244	2.73306	2.54671	2.71049	2.01956	2.11646	2.71629	2.43693	2.69591
14670	-0.227328	-0.282319	-0.209124	0.237184	-0.09999	-0.317107	0.0280762	0.106677	0.256694	-0.344025	-0.366692	-0.209448
80517	0.168917	0.1921	0.414296	0.412919	0.407685	0.207019	0.0575173	0.0964816	0.141487	0.515663	0.351469	0.451156
100046538	0.439415	0.264155	-0.0229556	0.0867601	0.328086	0.20847	0.632601	0.389595	0.384561	0.0368468	0.158344	0.170206
17833	0.170086	0.0879417	-0.0560251	0.0310744	-0.0995765	0.0181718	0.418662	0.524044	0.200989	-0.0639565	0.324299	0.260309
15396	-4.63573	-4.14576	-4.05817	-4.29867	-4.01005	-4.41864	-4.15388	-3.62159	-3.44258	-4.31178	-4.30262	-4.00927
15499	-0.88018	-0.758879	-0.677731	-0.675484	-0.588747	-0.555939	-0.344845	-0.475726	-0.244013	-0.52276	-0.74413	-0.417233
18619	4.26734	4.35058	4.56415	4.35958	4.67201	4.62288	3.27773	3.42204	3.31727	4.01506	4.49668	4.39722
18739	-0.660564	-0.677753	-1.52431	-1.14793	-0.630356	-0.870124	-0.611124	-0.712128	-0.792827	-0.710654	-1.03887	-1.39914
16409	0.733309	1.09528	1.15432	0.992919	1.27025	1.24583	0.867214	0.602208	0.207952	1.35693	1.13719	1.53735
632664	0.508137	-0.108247	0.611978	0.164865	0.364268	0.222263	0.141915	0.113049	0.0452703	0.463779	0.421963	0.221288
237694	-0.186306	-0.0049038	-0.452124	0.142446	-0.0894457	-0.0913407	0.0598072	0.129191	-0.0154981	-0.0624741	-0.28298	0.185815
22632	-0.0929556	0.444648	0.0689041	0.25888	-0.0040579	0.137619	-0.0124872	-0.0016475	0.0433713	-0.18922	-0.137585	0.562542
78592	-0.21161	0.0979295	-0.291798	-0.153339	-0.302192	-0.555939	-0.153431	-0.0720229	-0.0565642	-0.516089	-0.166371	0.0659147
225049	0.045803	0.540602	-0.0175665	-0.158402	0.33677	0.222989	0.758217	0.902542	0.742931	0.302567	0.437873	0.108483
72027	0.768401	0.573062	-0.0376531	-0.297254	-0.364424	-0.338159	0.373519	-0.814717	-0.924492	-0.406391	-0.278868	-0.419361
19712	0.448919	0.408977	0.613448	0.0578325	0.344006	0.2023	0.0549003	-0.0105684	-0.27503	0.268843	0.195794	0.289397
26559	0.383488	0.574043	0.978682	0.743418	0.80785	0.368721	1.04936	0.75726	0.721952	0.467402	0.294402	0.513589
399558	-0.1608	0.0108932	-0.20447	0.00503952	-0.161808	0.0371498	-0.0785663	0.208629	-0.0230941	-0.253704	-0.0281725	0.0879082
210162	0.614143	0.43894	0.745726	0.817907	0.0176509	0.475615	0.0882669	-0.22658	-0.180712	0.691327	0.443993	0.216322
108829	-0.631614	-0.444264	-0.436692	-0.0947609	-0.469349	-0.250321	-0.501865	-0.362941	-0.294653	0.0865073	-0.0193607	-0.331387
634594	-2.50537	-2.31554	-2.58768	-2.57314	-2.54543	-2.49491	-2.56929	-2.40772	-2.33103	-2.63296	-2.54688	-2.40374
53622	-0.668899	-0.315136	-0.619676	-0.862228	-0.805318	-0.688205	-0.681783	-1.14797	-0.712436	-0.907906	-0.94827	-1.5836
22371	1.78167	1.94995	1.86641	1.76022	1.83106	1.83832	2.15628	2.38149	2.45892	1.88763	1.65543	1.87293
22371	2.10408	2.32306	2.17065	2.45666	2.21747	2.41023	1.42228	2.16831	2.22065	2.12629	2.65502	2.66257
210094	-0.831929	0.00661272	-0.426403	0.0744659	-0.141547	0.147492	-0.419429	0.0957534	0.00846564	0.298491	0.0232296	-0.311522
66712	-0.678403	-0.230954	0.00496976	-0.683439	-0.632889	-0.463019	-0.442328	0.20608	0.410514	0.311832	-0.471332	-0.346286
56368	-0.311402	-0.452111	-0.367613	-0.454187	-0.326071	-0.264839	0.0280762	0.0448682	-0.0325892	-0.469888	-0.330711	-0.321455
231876	-0.0979269	0.18996	0.0115837	-0.245908	0.0552794	-0.0802443	-0.0203382	0.987927	0.76373	0.0405528	0.0151522	0.0382454
12292	1.50547	0.437157	1.85554	2.11194	1.50205	1.89729	2.39122	2.26106	2.28421	1.85106	1.65837	2.2471
320862	0.0278185	-0.225246	-0.531491	0.369528	-0.531581	-0.934877	-0.942173	-0.945981	-1.05046	-0.983787	0.00340312	-0.359057
77296	4.02316	3.53872	3.32441	3.08728	2.834	2.43688	0.461842	1.26486	0.954897	2.38451	3.41283	2.02476
93679	0.362652	0.336923	0.470882	0.2907	0.392489	0.352206	0.322488	0.236029	0.225677	0.133944	0.147014	0.290107
631043	-0.532918	-0.862323	-0.488133	-0.501194	-0.378172	-0.571184	-0.140066	0.292103	0.387093	-0.664329	-0.929912	-0.916698
100044352	1.79191	1.36352	0.733968	0.1909	0.550963	3.92526	-0.403727	0.435048	0.14845	0.740246	1.09019	-0.484632
27399	0.00734834	0.381154	0.504686	0.363742	0.519847	0.412458	0.649066	0.785297	0.840324	0.11319	0.351469	0.466764
13483	0.739157	0.703616	0.836116	0.532969	0.582803	0.70864	0.671202	0.639378	0.825131	0.737282	0.710549	0.679604
67773	-0.0636707	-0.047097	0.0426585	0.038909	0.0291255	0.181127	0.162488	0.0263894	-0.0933576	0.177428	0.0630051	0.0950029
108735	0.309771	0.350763	0.527835	0.334453	0.416188	0.673795	0.421279	0.622173	0.628267	0.399047	0.542391	0.455412
217410	0.0175834	-0.584806	0.0821319	0.110625	0.0820536	0.0828837	-0.112587	-0.0972278	-0.197803	0.13765	-0.25067	-0.0007753
14119	3.17511	3.2876	3.22594	2.96	3.15384	3.37355	3.28034	2.80332	2.92607	3.10245	2.8195	2.74345
69871	-0.250722	-0.146771	-0.377901	-0.416581	-0.24792	-0.377359	-0.0929597	-0.220845	-0.004104	-0.522019	-0.511352	-0.405881
17295	-0.996422	-0.206698	-0.378636	-0.320397	-0.666899	-0.137075	-0.564018	-0.519693	-0.495948	-0.247033	-0.490791	-0.396658
70456	0.461104	0.110593	0.538001	0.393393	0.734764	0.356198	0.433056	0.0722679	0.122497	0.975207	0.56442	0.695213
83380	-0.366964	-0.0533139	-0.158173	-0.109225	-0.161085	0.260738	-0.0209924	-0.0239496	0.0705905	-0.23888	-0.047999	0.135443
72309	0.323613	0.180091	0.168113	0.675438	0.125182	0.30923	0.465114	0.369841	0.234539	0.774342	0.276988	0.487339
72607	2.84612	1.58967	2.96285	3.12778	3.16325	2.82982	3.48316	2.4006	2.51019	3.17731	3.05669	3.23865
72826	-0.211244	-0.206618	-0.341892	-0.218427	-0.266424	-0.203861	-0.690288	-0.870791	-0.702308	-0.0966752	-0.354209	-0.307265
100045697	-0.120225	0.204228	0.0593507	-0.161295	0.142115	-0.0826295	0.266222	0.108588	0.209851	0.056118	-0.228029	-0.0575327
328232	-1.97972	-0.1696	-1.05252	-0.770222	-1.18284	-1.26227	-0.53654	-0.361667	-0.407328	-1.41813	-0.858684	-1.03092
244757	2.36507	1.92569	2.05601	2.28815	1.85349	1.52459	2.1956	3.16397	3.01279	1.93803	2.62711	1.98006
22673	2.25541	3.02791	2.48812	2.21728	2.52212	1.99137	2.666	2.53609	2.44309	2.55915	2.27684	2.32486
56543	0.104582	-0.184582	-0.32352	0.0694035	-0.278312	0.0284386	-0.724963	0.24495	0.373799	-0.0565445	-0.158146	-0.0227688
100047132	-2.97911	-2.67903	-2.45981	-2.29543	-3.11131	-3.0488	-2.54181	-3.1953	-2.3747	-2.55143	-2.67905	-2.73102
75718	0.0526752	-0.225246	-0.159643	0.182221	-0.0351738	0.0523944	0.236127	-0.078749	-0.248444	-0.0802629	-0.346131	0.120544
63953	0.204739	0.474611	0.423115	0.780301	0.598722	0.575483	0.319216	0.223285	0.0876816	0.827708	0.129705	0.786024
107528	0.255915	-0.848055	0.174726	0.12075	-0.0069524	-0.362841	-0.202219	-0.0927674	-0.322505	-0.553149	-0.343194	-0.455544
66106	4.41855	4.83399	3.8084	4.00385	3.9274	3.36106	5.09784	4.55881	4.7966	3.2305	4.15339	4.00701
11438	0.262495	-1.00287	0.216614	-0.358726	-0.484545	-0.0840814	-0.196985	0.0155569	-0.002838	0.128262	0.245727	-0.232771
235610	-0.243777	-0.272841	-0.27737	-0.323289	-0.220603	-0.237254	-0.262265	-0.249519	-0.241481	-0.161054	-0.49226	-0.322608
11736	-0.260226	0.00304566	-0.290451	-0.408626	-0.214633	-0.289376	0.0208794	0.0607983	0.241502	-0.330048	-0.191925	-0.446321
78416	0.878062	0.232764	0.670034	1.33933	0.587868	0.630239	0.558671	-0.457247	-0.431382	1.31171	1.17978	0.703726
12181	-0.444458	-0.603925	-0.291921	-1.00164	-0.474415	-0.0427867	-0.284491	-0.401173	-0.29402	-0.598362	-0.890259	-0.673351
243369	-0.0800677	-0.247362	-0.119224	-0.25314	-0.129969	0.0865134	-0.0975394	-0.355932	-0.632044	-0.190702	-0.219094	-0.15473
216565	0.0343982	0.165907	-0.109671	0.0134466	-0.142904	0.15584	-0.0792205	-0.0264984	-0.12754	0.407447	0.088339	-0.0582422
14885	-0.543153	-0.651153	-0.556477	-0.600995	-0.533028	-0.587155	-0.3447	-0.355932	-0.278828	-0.475199	-0.588455	-0.632202
15161	-0.54096	-0.865177	-0.32499	-0.20107	-0.3637	-0.688059	-0.192405	-0.470628	-0.0104341	-0.184031	-0.285183	-0.597438
100046710	-0.424353	-0.275631	-0.509518	-0.622691	-0.616245	-0.921085	-0.325348	-0.320248	-0.335672	-0.418251	-0.463622	-0.962104
83434	-0.55836	-0.289453	-0.39958	-0.580529	-0.641572	-0.245965	-0.12559	-0.0941055	0.178834	-0.128441	-0.470965	-0.493146
83434	-0.0606419	-0.134643	-0.495482	-0.180097	-1.14811	-0.283714	-0.243437	-0.401173	-0.0363872	-0.132147	-0.285183	-0.30159
103806	-0.261688	-0.0461798	-0.142741	-0.14495	-0.128522	-0.0129397	-0.195677	-0.127176	-0.0623404	-0.0891573	0.142923	0.0673336
28042	-0.61553	-0.512751	-0.77694	-0.911244	-0.671964	-0.708658	-0.750479	-0.538809	-0.657997	-0.730296	-0.701265	-0.665547
16440	-0.249991	-0.0597346	-0.510179	-0.510144	-0.49726	-0.508463	-0.720383	-0.716588	-0.842835	-0.60948	-0.4974	-0.632202
227682	-0.417042	-0.257588	-0.221495	-0.394575	-0.228961	-0.278342	0.0122434	0.0340358	0.00349204	-0.155421	-0.194128	-0.191859
16636	0.118472	-0.425715	-0.0435321	-0.239399	-0.260221	0.14604	-0.470461	-0.512046	-0.463665	-0.2182	-0.438532	-0.403753
71389	0.217899	-0.0076555	0.0711087	-0.0014692	0.186979	-0.0811777	-0.11455	-0.159036	0.0148861	-0.208491	0.0797719	-0.337772
668251	0.0716832	-0.337965	-0.0472065	0.208463	0.116788	0.034246	0.164814	0.352	0.372533	-0.0520973	0.0267544	0.0623674
97360	-0.397669	-1.25185	-0.750484	-0.587254	-1.5461	-1.76825	-1.28304	-1.11165	-1.3505	-1.26025	-0.821233	-1.06143
19365	-0.559968	-0.245935	-0.217698	-0.420197	-0.26384	-0.373004	-0.125018	-0.0870326	0.0769205	-0.480511	-0.295463	-0.251217
233571	1.26334	1.51905	1.44092	1.45142	1.24781	1.30318	0.919816	0.569285	0.340883	1.21684	1.21135	1.04143
74020	-0.185656	-0.629751	-0.573379	-0.823738	-0.176281	-1.73921	-0.644491	-0.338019	-0.644071	-1.2143	-0.828577	-0.675479
20677	0.656546	1.29289	0.911074	0.793318	0.926525	0.654921	0.656154	0.73687	0.861846	0.551981	0.615822	0.956084
74356	-0.748586	-0.766013	-0.688755	-0.833139	-0.857213	-0.780253	-0.594114	-0.904563	-0.901071	-0.711025	-0.962222	-0.512302
269854	0.689444	0.343343	0.566416	0.935064	0.836072	0.559097	0.314637	0.654033	0.391524	0.332586	0.212683	0.416392
76497	-0.335527	-0.787415	-0.452859	-0.71092	-0.372383	-0.553761	-0.415504	-0.543269	-0.454803	-0.711766	-0.472433	-0.752102
223696	0.155209	0.136953	0.196446	0.22272	0.151232	0.198816	0.534464	0.38832	0.366836	0.230819	0.235741	0.109973
76770	2.80738	4.01028	2.86291	2.65481	2.81012	3.61359	2.28131	2.91992	2.06329	2.82673	4.1097	4.12762
66789	-0.178345	-0.133751	-0.29339	-0.207579	-0.168321	-0.147238	-0.208107	-0.313877	-0.307313	-0.0224493	-0.108947	-0.0802357
170459	-0.137405	-0.0554541	-0.0229556	-0.371743	-0.0916166	-0.142156	-0.248671	0.503016	0.325691	-0.0120725	-0.189722	-0.290238
244551	0.300511	0.444648	-0.0641087	0.219104	0.399725	0.12281	0.592038	0.342442	-0.0211951	0.473414	0.469694	0.390851
13177	-0.196785	-0.385447	-0.155723	-0.0294326	-0.0590534	-0.167322	0.20734	-0.144381	-0.148429	-0.210097	-0.104052	-0.0420131
108664	-0.0621041	0.036576	-0.0126673	-0.125376	0.0409516	-0.16829	0.0450866	0.508114	0.258086	-0.172419	-0.200002	-0.0887493
69716	-0.733965	-0.731055	-1.02337	-1.1985	-0.960962	-0.966093	-0.959184	-1.69788	-1.73854	-0.959698	-1.22749	-1.46228
69930	0.273461	-0.0247774	-0.17434	-0.124412	-0.0286611	-0.136349	0.0313474	0.0289382	-0.0787985	0.0916957	-0.161818	0.0219277
244650	0.258839	-0.202417	0.161131	0.15691	0.283945	-0.0644811	0.417354	0.279996	0.228842	0.492685	0.220761	0.461798
70239	-0.225866	-0.153334	-0.451389	-0.408316	-0.333308	-0.372278	-0.444291	-0.485284	-0.440244	-0.268404	-0.53485	-0.395949
240216	-0.206126	-0.415014	-1.09294	-0.418751	-0.491782	-0.55231	-0.861047	-0.497391	-0.471261	0.0464824	-0.554677	-0.143378
17684	-0.535007	-0.740924	-0.51209	-0.590353	-0.458736	-1.2405	-1.5696	-1.38947	-1.3657	-0.355743	-1.12891	-0.714263
72180	-0.442265	0.0137468	-0.286777	-0.294362	-0.242131	-0.410026	-0.242128	-0.559199	-0.523167	-0.19589	-0.197799	-0.0937156
17919	3.41637	3.70565	3.42068	3.07571	3.40277	3.26684	3.6814	3.51507	3.39893	3.24921	3.28212	2.93855
240754	-1.71288	-2.0152	-2.12764	-2.48491	-1.80589	-1.84375	-2.19506	-1.43535	-1.57206	-1.75464	-2.2157	-2.1086
70784	1.42454	1.38296	0.948369	1.84339	-0.0434274	1.41957	0.442869	1.28805	1.10935	1.71048	1.31768	1.08755
20973	0.481087	0.25274	0.341544	0.247309	0.373675	0.184515	0.82495	0.710744	0.927678	-0.0268965	0.399199	0.341582
21389	-1.003	-0.306575	-0.949636	-0.94885	-1.30152	-0.984967	-0.196985	0.174539	0.374432	-1.30473	-0.877041	-0.72798
320827	2.34387	1.15521	1.45929	1.74287	1.57272	1.51007	0.823642	1.11027	0.96819	1.77719	1.69013	1.73387
22032	0.0878714	-0.17507	-0.283207	0.0383063	-0.181346	-0.196809	0.0176082	-0.161585	-0.130072	-0.340672	0.252336	-0.229933
22722	-0.367878	-0.475832	-0.216963	-0.410072	-0.128522	-0.262298	-0.163782	-0.214473	-0.334532	-0.187737	-0.258564	-0.549194
100045146	-0.118982	0.127179	-0.153274	-0.171419	-0.0501287	-0.179905	-0.111933	0.16976	0.146472	-0.321365	-0.118493	-0.0810465
56752	-0.430567	-0.806677	-0.901134	-0.59304	-0.727684	-0.418012	-0.724963	-0.775848	-0.309845	-0.883725	-1.02317	-0.90109
26441	-0.597253	-1.14626	-0.585872	-0.441652	-0.404657	-0.657328	-0.397185	-0.677082	-0.682052	-0.414792	-0.547439	-0.464925
52163	-0.098658	-0.583379	-0.222842	-0.107778	-0.0568825	-0.335255	-0.641219	-1.03391	-0.737756	-0.507195	-0.495932	-0.304428
52163	0.109699	-0.519885	-0.300004	-0.0130403	0.0958025	-0.0855333	-0.482237	-0.909023	-0.474426	-0.539066	-0.518695	-0.210778
57916	-2.20489	-1.66634	-1.58384	-2.03291	-1.86884	-1.34793	-1.77372	-1.17983	-1.77272	-1.63308	-1.76997	-1.79644
103988	0.250066	0.433947	0.445896	-0.224935	-0.359358	0.295583	1.63401	2.00554	1.87402	0.172857	0.405074	0.454703
106512	-0.850937	-0.83236	-0.841609	-0.663189	-0.944048	-0.265565	-0.571215	-0.954264	-0.733325	-0.623563	-0.689791	-0.868454
66052	0.181199	-0.169885	0.0494298	0.121152	-0.0409628	-0.044155	0.274073	0.0554883	0.101397	-0.0928634	0.0812406	0.12347
113858	0.178421	0.105064	-0.0251602	0.173543	0.367162	-0.0354437	0.308094	0.0856491	-0.110449	0.250313	0.512284	0.545515
75292	-0.800493	-1.38383	-0.95772	-0.585085	-0.767483	-0.821631	-1.2621	-1.46912	-1.51635	-0.914114	-1.27284	-1.07988
67534	-0.993498	-0.561263	-0.617471	-0.953912	-1.09601	-1.04522	-0.609815	-0.228491	-0.205399	-0.817017	-0.678776	-1.0068
68040	-0.224403	0.0215944	-0.203409	-0.273389	-0.220422	-0.228543	-0.10539	0.0467798	-0.147796	-0.106099	-0.146922	-0.134155
11790	-0.123027	-0.0088445	-0.23313	0.130152	-0.245206	-0.176759	-0.502192	-0.412006	-0.434547	-0.328648	-0.242266	-0.235767
68241	-0.183463	-0.203538	-0.335401	-0.245185	-0.187425	-0.0194732	-0.270261	-0.286477	-0.288323	-0.189961	-0.303751	-0.198126
78558	2.16257	2.38442	2.2454	2.32657	2.24009	2.29892	2.02419	1.99598	2.05759	2.67923	2.23303	2.55757
78784	3.82504	2.51568	2.61231	2.51555	2.33832	2.28392	2.24401	2.45158	2.20255	2.45909	2.83492	2.55402
16179	-0.0509551	-0.276612	-0.19308	-0.0273836	-0.0856208	0.4097	0.117054	0.155741	0.259859	-0.224056	-0.0244091	-0.183818
16179	-0.634538	-0.331545	-0.785758	-0.520721	-0.436786	-0.369858	-0.128289	-0.02841	-0.0642394	-0.628603	-0.534116	-0.548484
67897	-0.785871	-0.911549	-0.631434	-0.927154	-0.555461	-1.01473	-1.35697	-1.22508	-1.11629	-0.636905	-0.913023	-0.942948
30791	0.239831	0.465337	0.27026	0.227059	0.191864	0.162979	0.207994	0.0423194	-0.0560104	0.282925	0.207648	0.244701
74213	-0.509158	0.304819	-0.0464717	0.144615	-0.268543	0.407377	-0.178666	-0.276919	-0.412392	0.114673	-0.206244	0.148922
100048307	0.00369295	0.0858015	0.168113	0.0607253	0.171783	-0.0869851	0.7942	1.1708	1.25684	0.208064	0.17817	0.0346981
16572	0.642029	0.272002	0.547309	0.843941	0.593657	0.607735	0.0791075	0.238578	0.0522334	0.887004	0.616557	0.594468
100041100	0.473045	-0.524166	0.728824	0.298655	0.541556	0.321716	0.227622	0.050603	-0.0674044	0.372487	0.694394	0.720044
74158	-1.07538	-1.16196	-1.09735	-0.795533	-1.03812	-1.19186	-1.02068	-0.854861	-0.758012	-0.803675	-0.833717	-1.03447
407819	-0.673285	-0.355189	-0.412441	-0.601718	-0.360082	-0.535613	-0.623555	-0.386518	-0.247811	-0.365625	-0.400471	-0.288819
666215	-0.536391	-0.289453	-0.450287	-0.415858	-0.268905	-0.450679	-0.0327689	-0.141832	-0.007902	-0.776992	-0.484917	-0.723013
53617	2.3797	2.9366	2.42272	2.19228	2.41213	2.06178	0.863551	0.50684	1.94311	2.68368	2.48319	2.65122
224742	-0.3443	-0.651153	-0.346302	-0.647279	-0.614074	-0.0427867	-0.355313	-0.190896	-0.105385	-0.41788	-0.486385	-0.545647
56350	-0.692502	-0.949431	-0.475115	-0.460696	-0.514938	-0.530169	-0.726926	-0.817903	-1.00868	-0.962292	-0.693462	-0.712529
66826	0.253234	0.304748	0.107689	-0.0188258	0.18394	0.378067	0.2165	0.397241	0.341516	0.141686	0.00046586	0.249525
12389	0.428815	-0.251642	0.868451	0.801996	0.55241	0.135151	-0.321947	-0.598387	-0.639007	0.335551	0.0026688	-0.0107078
216225	3.88352	4.58386	2.63669	2.61504	2.38056	2.28477	0.84196	1.15296	1.43788	2.52387	2.48759	4.14252
67041	-0.0747761	-0.237493	0.0566561	0.0177355	0.0934249	-0.123403	0.0614428	-0.510772	-0.529497	-0.115748	-0.0942609	-0.0121268
216233	0.482427	1.03749	0.456604	0.49012	1.17835	0.471622	0.190984	0.232206	0.256061	0.297961	0.263473	1.20035
67276	-0.739976	-0.86161	-0.82094	-1.0096	-0.831162	-0.862574	-0.908807	-1.02499	-1.13085	-0.770568	-0.902302	-0.926631
94065	-0.443727	-0.437932	-0.378391	-0.670421	-0.416283	-0.400008	-0.343798	-0.517781	-0.398466	-0.432333	-0.496666	-0.395037
67501	-0.455424	-0.38291	-0.435222	-0.477329	-0.478033	-0.511657	-0.6844	-0.900102	-0.846	-0.369331	-0.650872	-0.342029
320522	-0.30336	-0.118631	-0.115305	-0.585808	-0.117667	-0.28081	-0.590842	1.08988	0.965658	-0.426404	-0.0932002	-0.0589516
259089	0.574665	0.584477	0.443692	0.45848	0.417092	0.432784	0.522688	0.481352	0.48774	0.0309172	0.316956	0.354668
100046891	0.526414	0.617294	0.39078	0.56262	0.415645	0.445125	0.246595	0.0372218	0.0927456	0.447287	0.33768	0.368148
17207	0.0110037	-0.318703	-0.0530856	-0.418027	-0.0435472	-0.25758	0.177899	0.281907	-0.109816	-0.180325	-0.0333127	0.0786851
17300	-1.28081	-0.873738	-0.887906	-0.718875	-0.855765	-1.11636	-1.74952	-1.25056	-1.35304	-0.894101	-1.3169	-0.977003
100044683	-0.660126	-0.263057	-0.416115	-0.441893	-0.243578	-0.252498	0.00190623	-0.0468889	0.0572974	-0.454569	-0.291058	-0.171048
320937	-0.160069	-0.233807	-0.222842	-0.651618	-1.27402	-0.979159	-0.267644	-0.27437	-0.0617074	-1.21727	-0.358615	-0.951462
70750	0.0481263	0.254666	-0.002624	0.0343804	0.0528372	-0.0482686	0.228276	0.485175	0.0971767	-0.134371	0.0370348	-0.130608
72795	-0.379392	-0.396465	-0.433017	-0.530122	-0.349227	-0.28444	-0.50579	-0.533711	-0.666859	-0.276575	-0.446732	-0.304428
22222	-0.168842	-0.17174	-0.152294	-0.268327	-0.0764204	-0.32001	-0.264373	-0.373773	0.0490683	0.0679772	-0.205143	-0.0085794
22678	1.21874	1.05818	1.26602	1.33282	1.38169	1.20518	1.02908	0.680796	0.809939	1.17978	1.28405	1.22164
80982	-0.404492	-0.0818504	-0.104527	-0.357279	-0.130692	-0.471005	-0.0190297	0.592862	0.651055	-0.202561	-0.346131	-0.117837
574428	0.433567	1.03321	0.90446	1.10863	0.482942	1.06798	0.120325	0.450766	0.0946446	0.862545	1.0498	0.800923
23996	-0.0372474	-0.165727	-0.0016441	-0.0578781	0.0146117	-0.108037	0.245286	0.243675	0.404817	0.041294	-0.0308999	-0.0050321
211228	-0.969372	-1.1698	-1.01945	-0.64294	-0.975887	-0.269921	-0.979466	-1.4876	-1.33468	-0.647282	-1.05401	-0.958557
75580	0.916078	0.964012	1.09406	0.862423	1.09658	0.86762	0.275382	0.335432	0.196558	0.993737	1.06375	0.755517
52443	0.0241631	0.112198	0.185015	0.206087	0.264407	0.409555	0.386604	0.165937	0.0819846	0.322786	0.301535	0.1922
65019	-0.276623	-0.184136	-0.293684	-0.358519	-0.183083	-0.407641	-0.702719	-0.658603	-0.512533	-0.186255	-0.26658	-0.329968
66107	-0.260226	1.77873	-0.197122	0.90252	0.244146	2.54308	1.01337	0.607518	0.318728	0.239195	1.1695	-0.085202
76123	-0.0778223	0.0201675	0.15415	-0.200106	-0.161808	-0.105496	-0.156349	-0.0545353	-0.202931	0.130238	-0.180665	-0.0165863
11472	4.15768	4.18507	4.15482	3.95294	3.67727	3.11657	4.00394	3.60109	3.7053	3.97262	3.70252	3.72535
78100	0.384128	0.443934	0.528937	0.305164	0.4786	0.32462	0.00321473	-0.0609073	-0.0773426	0.483156	0.355875	0.373824
11739	0.796913	0.17046	1.10802	1.26484	1.01897	1.25527	1.02646	0.838185	0.783986	1.19293	1.05274	1.19823
68271	-0.475163	-0.26163	-0.0692529	-0.266157	-0.0207013	0.220085	-0.0133284	0.0476082	0.247199	0.00052796	-0.407814	-0.371827
12183	0.505212	0.364746	0.657541	0.519952	0.516229	0.334783	0.692138	0.467333	0.415578	0.709561	0.969028	0.351121
14601	-0.211244	-0.111814	-0.270609	-0.178651	-0.8507	-0.0986001	-0.203528	-0.27883	-0.132604	-0.343389	-0.319696	-0.429294
11566	-0.209051	0.210649	-0.194182	-0.103982	0.129813	-0.121623	0.245941	-0.0271356	0.352277	-0.212514	-0.700071	-0.073141
14744	-0.499289	-1.0421	-0.98393	-0.775284	-0.730578	0.131521	-1.45837	-1.70298	-1.97591	-1.01195	-0.976908	-1.11961
68735	-0.032861	-0.069009	0.00879112	-0.0601682	-0.0477166	0.0698169	-0.0724327	-0.166683	-0.116067	-0.140856	-0.0002685	0.170561
68735	-0.158606	-0.229527	-0.224679	-0.378975	-0.13431	-0.158853	-0.206145	-0.417103	-0.49215	-0.14623	-0.275637	-0.12777
14894	-0.514763	-0.506331	-0.38525	-0.497578	-0.430273	-0.598043	-1.18555	-1.19513	-1.17959	-0.290393	-0.469496	-0.591762
83435	-1.08415	-1.12629	-0.789433	-0.805658	-0.678477	-1.27534	-1.07237	-1.24164	-1.28974	-0.817758	-0.965159	-1.33883
258293	0.182912	0.348133	0.168847	0.260326	0.513335	0.378339	0.2165	0.223922	-0.006636	0.476379	0.727438	0.420649
96957	-0.507331	-0.47066	-0.50871	-0.186606	-0.434615	-0.496413	-0.298393	0.65021	0.468117	-0.303364	0.0526023	-0.0873304
320129	1.45781	1.5483	1.13404	1.2012	0.959088	1.2785	0.166777	0.888524	0.83526	1.08268	1.24073	1.17339
18776	-0.482474	0.0686796	-0.0876248	-0.686331	-0.150954	-0.449227	-0.248016	-0.197269	-0.121843	0.0331408	-0.341725	-0.129189
16443	0.8225	0.328362	0.704573	0.761498	1.01698	0.935858	0.668585	0.512574	0.60991	1.03895	1.05127	1.09677
18979	1.28454	3.58366	2.0325	1.54399	3.20233	4.4855	0.0753456	-0.494842	-0.123172	2.74519	2.71523	1.8559
19181	-0.205477	-0.370497	-0.154289	-0.211195	-0.162411	-0.253315	0.0280762	-0.137372	-0.107284	-0.369331	-0.224235	-0.276758
98258	-0.301167	-0.191092	0.0740482	-0.232374	-0.125989	-0.183638	-0.156422	0.0174685	-0.19084	0.190275	-0.110783	-0.0128362
245841	-0.511717	-0.630464	-0.460942	-0.77673	-0.551119	-0.720727	-0.694214	-0.551553	-0.633943	-0.360437	-0.548068	-0.686831
71665	0.509599	0.395422	0.0777226	0.25888	0.220059	0.292098	-0.0164127	0.385134	0.369228	0.313963	0.278667	0.203551
19366	-1.55204	-1.51296	-1.52798	-1.90925	-1.52367	-1.73776	-1.44071	-2.13373	-1.93223	-1.50856	-1.71783	-2.11854
19671	-0.0964647	0.085088	-0.107467	-0.267604	-0.147336	-0.126549	0.228276	0.257694	0.0952776	-0.184031	-0.174301	-0.296623
19671	-0.339822	-0.0214482	-0.148473	-0.378252	-0.148602	-0.303314	-0.0844545	0.0709935	0.0218492	-0.196961	-0.214964	-0.241373
100044903	2.43964	0.445361	-0.17728	0.373144	0.51044	0.450207	0.404269	0.0894724	0.274418	0.113932	1.65341	0.33906
20199	-0.295318	-1.37384	-1.83222	-1.07252	-1.23495	-1.19476	-1.50417	-1.37354	-2.21582	-1.0416	-0.584049	-1.31897
226791	-0.568741	-0.858756	-0.728438	-0.856715	-0.699359	-0.708386	-1.10116	-1.17474	-1.51382	-0.532396	-0.775706	-0.96856
26894	-0.124063	-0.128757	-0.318376	-0.419835	-0.102471	-0.277664	-0.244091	-0.085121	-0.192739	-0.123253	-0.193393	-0.443483
27275	0.0212388	-0.17174	-0.384025	-0.387653	-0.244302	-0.320252	-0.516258	-0.612724	-0.756113	-0.181066	-0.0472647	-0.267358
108673	-0.443727	-0.22331	-0.280163	-0.193115	-0.236704	-0.385344	-0.157367	0.00854771	-0.0094494	-0.41964	-0.371098	-0.311664
100045457	-0.0350542	0.0959081	0.214116	0.010584	0.0733701	-0.0241917	0.558017	0.611341	0.459255	0.0564145	0.125509	-0.157568
100047784	0.0914223	-0.0190701	0.227638	0.130634	0.233395	0.219722	0.406886	0.113049	0.0553984	0.334727	0.29115	0.0417928
74359	-0.437147	-0.310244	-0.25236	-0.245185	-0.27397	-0.0187472	-0.933668	-0.23104	-0.202867	-0.245021	-0.702274	-0.0142552
50918	0.0643724	0.0287285	0.126225	0.39484	0.0285053	0.861086	0.585495	0.672512	0.601048	0.0459883	0.194178	0.293831
207175	-0.571666	-0.621903	-0.349241	-0.527953	-0.204502	-0.61837	-1.02395	-1.33595	-1.58535	-0.35599	-0.515758	-0.596019
76498	-0.0971958	-0.124655	0.0196673	0.389054	-0.08192	-0.138889	0.0274219	0.0486914	-0.170584	-0.144006	-0.132445	0.0754925
56222	1.36423	0.824183	0.102708	0.88661	0.390318	0.325346	1.19591	2.15464	2.15254	-0.160313	1.30755	0.414973
66790	0.41529	0.414888	0.2732	0.124366	0.226779	0.25856	0.143878	0.113686	0.0794525	0.0820601	0.231775	0.313519
216440	-0.245056	-0.0222805	-0.150732	-0.205409	-0.122813	-0.210848	-0.0085617	0.106677	0.0908466	-0.0842469	-0.0024714	-0.168131
12879	1.47535	1.60252	1.75716	2.00249	1.8635	1.94067	1.32349	1.30016	1.10998	2.22042	1.79623	2.14324
100046233	0.8766	0.239185	0.815539	1.22723	0.857057	0.446577	0.432401	0.0767283	0.240236	0.79213	0.975637	0.548353
94216	1.39347	1.0168	1.57908	1.49626	1.32162	0.630239	-0.79693	0.207992	0.212383	0.571994	1.12397	0.475987
12847	0.125052	-0.110387	0.0270161	-0.134536	0.0806063	-0.171194	-0.283346	-0.232952	-0.112981	0.00497516	-0.0443274	-0.122804
21951	-0.744931	-0.850037	-0.563825	-0.671867	-0.433891	-0.535613	-0.717766	-0.54773	-0.44151	-0.579091	-0.450404	-0.522944
67731	0.448676	1.14451	1.1308	0.991039	0.245593	1.09266	0.806631	1.12811	0.87324	1.13549	1.05494	1.30323
16865	-0.307015	-0.213118	-0.236805	-0.348601	-0.26384	-0.330899	0.0520216	-0.0934046	0.109204	-0.599104	-0.410017	-0.20723
258322	-0.0606419	0.00426865	-0.008258	0.151124	-0.0033342	0.236782	-0.238857	0.118146	0.262391	0.00275156	-0.396799	-0.316489
16995	2.5939	3.10353	2.28456	2.71918	2.85137	2.45724	2.99705	2.95497	2.96948	2.69702	2.75195	2.7548
14182	-0.0072732	-0.507757	0.0431834	0.029628	-0.0243194	-0.325092	-0.077912	-0.308142	0.149083	-0.544996	-0.265356	-0.342739
666581	0.590018	-0.252356	0.321702	0.350725	0.0509377	0.0850615	-0.374286	-0.988673	-1.11946	0.0909545	0.0577425	0.123382
171285	-0.875063	-1.22188	-0.665238	-0.424536	-1.01569	-0.547954	-0.664118	-1.61887	-1.50179	-1.29509	-0.622234	-0.945077
230259	0.163068	0.0315821	0.126959	0.142446	0.0560031	0.0473129	-0.28858	-0.491656	-0.578239	-0.0535797	-0.089855	-0.109324
70311	0.155026	-0.377203	0.384166	0.645787	0.621878	0.869797	-0.328489	0.239852	-0.0541113	1.16495	0.641523	0.38888
17263	2.99673	2.8089	2.63657	2.50334	2.35786	2.44653	2.68301	2.4707	2.56463	2.99498	2.63005	2.51854
72475	-0.0253674	-0.0363347	-0.109549	-0.103646	-0.149362	-0.0683528	0.480161	0.336707	0.0147957	-0.245657	-0.193149	-0.129898
259116	0.0470093	-0.200705	0.297451	-0.0976536	-0.208482	-0.1182	-0.0048543	0.10502	0.0642604	0.205841	0.115019	-0.832981
72774	-0.816577	-0.544141	-0.74681	-0.783962	-0.618416	-0.88261	-0.554859	-0.45661	-0.51747	-0.953398	-0.863089	-0.600276
72774	-0.540229	-0.798116	-0.587341	-0.871468	-0.804388	-0.913825	-0.450833	-0.450238	-0.668758	-0.877795	-1.01216	-0.664128
675857	0.259387	0.387813	0.142024	0.213319	0.184567	0.0712687	0.290102	0.550807	0.575728	0.181752	0.236076	0.256762
22273	0.343827	0.147868	0.564946	0.369673	0.645396	0.485778	1.1102	0.86877	0.877741	0.632958	0.536516	0.591098
22273	0.445264	0.165704	0.416501	0.54454	0.511525	0.471985	1.0945	0.705647	0.935274	0.441079	0.389653	0.40504
22370	2.62388	3.09355	2.9176	2.65337	2.74283	2.81313	2.68759	2.54461	2.08101	2.83253	2.67275	2.58807
23789	-0.510255	-0.390282	-0.510179	-0.405733	-0.55329	-0.67717	0.072565	-0.278193	-0.0617074	-0.839994	-0.642795	-0.5946
56715	0.948977	1.54687	1.12786	0.96833	0.996717	0.912265	0.9558	1.31163	1.0872	1.2413	1.09606	1.294
24084	0.890491	0.902658	0.664155	0.828754	0.537938	0.274531	-0.222501	0.406162	0.0655264	0.0931781	0.548265	0.223417
246703	-0.280331	-0.609865	-0.59616	-0.417304	-0.512333	-0.594704	-0.452142	-0.723597	-0.565579	-0.833323	-0.666293	-0.470038
75434	0.0357385	0.0808076	0.176196	0.044815	-0.0525408	0.0654612	0.510911	0.321414	-0.240848	0.136168	-0.226438	-0.107195
75669	-0.0770912	0.063329	-0.0354485	-0.119349	-0.112602	-0.190898	-0.155404	-0.166046	-0.0623404	0.041294	-0.0781059	-0.099746
64383	0.0563306	-0.250216	0.0747831	-0.163464	-0.114049	-0.102956	-0.102119	-0.266086	-0.10855	-0.120288	-0.0744343	-0.0263161
242620	0.0848426	1.34854	0.415766	0.401348	0.331544	0.588861	0.207994	-0.633115	-0.0205621	0.782495	0.239118	0.576731
236727	0.710645	-1.31748	0.938999	0.506934	1.01915	1.14856	0.770647	0.490272	0.0175764	1.3547	0.7737	0.84491
113865	-0.294587	-0.0575944	-0.150089	-0.645109	-0.25588	-0.055044	0.138644	0.0365846	0.190228	-0.156607	-0.353474	-0.0930061
66229	-0.125708	-0.0069421	-0.111876	-0.142491	-0.170492	-0.250321	-0.355313	-0.285202	-0.280094	-0.237398	-0.243327	-0.26115
66262	-1.29763	-1.02569	-1.26343	-1.34805	-1.10397	-1.23106	-1.11424	-0.364853	-0.522534	-1.03271	-0.77644	-0.810593
66262	-1.05856	-0.726062	-0.952575	-1.12242	-0.985294	-0.834698	-0.706579	-0.150753	-0.343394	-0.809605	-0.821968	-0.867035
100044565	0.278578	-0.0304847	0.30186	0.297209	0.577737	0.745662	0.117708	0.0480542	0.340883	0.307385	0.112082	0.400074
242384	1.39493	0.363319	1.0338	0.762221	0.14718	0.849471	0.614936	0.61389	0.486474	0.998926	0.856678	0.882512
12266	-1.37146	-0.793122	-2.53624	-1.32202	-1.95206	1.38303	-2.25656	-1.8438	-1.80057	-1.16019	-1.16326	-1.3218
14675	2.38335	1.79728	2.03617	2.10012	1.83106	1.88611	2.18317	1.2632	1.03149	1.6964	1.87811	1.6388
68662	0.0658346	-0.121801	0.495868	0.603119	0.165994	0.582327	1.99017	0.254508	-0.608623	0.666126	0.0467277	1.82469
80707	-0.599446	-0.845201	-0.89746	-0.71092	-0.64519	-0.72726	-0.650379	-0.769476	-0.659263	-0.850371	-0.740459	-0.642844
246278	1.53652	2.34054	1.80057	1.76999	-0.163979	0.772522	2.07086	2.31414	2.31206	1.90616	2.13491	1.54118
235626	-0.363747	-0.565009	-0.46594	-0.0144866	-0.307257	-0.585461	-0.888525	-0.777122	-0.802322	-0.435298	-0.192659	-0.374074
15505	-0.270827	-0.342857	-0.302314	-0.897503	-0.326506	-0.383409	-0.23326	-0.409457	-0.490251	-0.305465	-0.292159	-0.314765
69219	-0.545347	-0.878018	-0.531491	-0.768775	-0.566315	0.0255348	-0.469152	-0.715314	-0.860559	-0.387861	-0.666293	-0.298752
18845	0.696024	0.55166	0.589197	1.16648	0.803508	0.612211	1.15404	0.791032	0.906156	0.629066	1.01529	0.727139
19141	-0.267756	-0.346384	-0.162582	-0.22009	-0.142833	-0.077548	-0.229697	-0.585325	-0.396567	-0.0661801	-0.192741	-0.177433
22654	-0.0142707	0.360465	-0.151664	0.129738	0.0128956	-0.0205102	0.434364	0.45204	0.139588	-0.0921222	-0.0179736	-0.0304547
19882	2.94263	3.36036	2.86364	2.83416	2.95412	2.65136	3.01681	2.92438	2.90835	2.80949	2.84062	2.71436
20135	-0.88676	-0.834817	-0.886436	-0.963314	-0.606838	-0.795716	-0.340265	-1.08871	-1.10047	-0.991858	-1.12083	-1.20396
263876	0.331947	0.423245	0.257033	-0.0933145	0.0972497	-0.254676	0.38595	0.302298	0.214282	0.0509296	0.051868	-0.0653369
72033	-0.438609	-0.325837	-0.265465	-0.218427	-0.111878	-0.292425	-0.824409	-0.505037	-0.227554	-0.299658	-0.205143	-0.256184
20510	0.612681	1.32214	0.796433	0.736186	0.521294	0.591038	1.3176	1.90996	1.89807	0.146545	1.07697	0.416392
20589	0.172572	0.121353	-0.0163417	-1.08481	-0.0800386	0.0739305	0.192947	-0.533074	-0.315542	0.159145	-0.0032057	-0.18098
74167	-0.707646	-0.556983	-0.649806	-0.513778	-0.0434274	-0.0427867	-0.650379	-0.485921	-0.476958	-0.38712	-0.557614	-0.363313
30806	4.92165	4.83891	4.225	4.23802	4.18472	4.49923	4.31275	3.88082	4.156	4.23538	4.78453	4.8832
232536	-0.829224	-1.16196	-0.806335	-0.732616	-0.659663	-0.70403	-0.329797	-0.670072	-0.553552	-0.636164	-0.817562	-0.443483
404322	-0.0922872	0.184966	-0.0758668	-0.169973	0.134878	0.100306	-0.123709	0.627271	-0.463665	0.0968841	-0.382847	-0.0972629
76416	-0.363308	-0.245935	-0.411706	-0.368127	-0.207397	-0.156675	-0.0838002	-0.408182	-0.452271	-0.0261553	-0.17063	-0.406591
238130	-0.193698	-0.197138	-0.316906	-0.190222	-0.137748	0.108291	-0.307553	-0.379508	0.402285	-0.389529	-0.667761	0.294363
66714	0.109699	-0.606208	-0.0089929	-0.072583	0.145009	0.0952246	-0.0007108	-0.243147	-0.510507	0.115167	0.0709602	0.0871987
320473	-0.339183	-0.263057	-0.729173	-0.189499	-0.129969	-0.0056804	-0.670661	-0.346374	0.112369	-0.0839689	-0.357146	0.117706
258729	-0.214168	-0.297301	0.0101139	-0.410795	-0.136481	-0.457938	0.366977	0.464147	0.265556	-0.0884161	0.021761	-0.299461
93684	-0.605173	-0.822372	-1.05252	-0.769498	-0.386856	-0.748796	-1.04358	-1.12185	-0.96627	-0.484959	-0.504743	-0.487328
223881	-2.46077	-2.21781	-2.39808	-2.11174	-2.17855	-2.0804	-1.92027	-1.71317	-1.57079	-2.06149	-2.10195	-2.00147
13101	1.30209	1.79014	1.0485	0.68267	1.7804	1.22018	0.199489	-0.088307	0.241502	1.33691	0.992526	0.80518
70099	-1.54912	-1.34887	-1.5475	-1.599	-1.53525	-1.66299	-2.05243	-2.46698	-2.58929	-1.58227	-1.80228	-1.88906
67604	-0.318591	-0.20099	-0.17434	-0.174312	-0.393947	-0.357214	-0.477657	-0.443229	-0.509874	-0.0231905	-0.252139	-0.319326
218214	-0.0818432	0.0130334	-0.105262	0.126536	-0.229105	-0.228543	-0.785808	-0.797513	-0.77447	-0.320412	-0.291792	-0.27392
52004	-0.022041	0.0660043	-0.0203835	-0.0443183	-0.0301084	-0.455034	0.140607	0.104128	0.0478023	-0.0222022	-0.285672	-0.0934318
69677	1.1588	1.02751	0.761893	1.05367	0.00028388	0.21573	1.15142	3.08177	2.96025	-0.161054	1.17097	0.142537
432720	2.0434	-0.390044	-1.32295	-0.791194	-0.870962	0.540949	2.29308	-0.44599	1.61322	-0.977857	0.408011	-0.942239
674995	-0.130094	-0.528446	0.18575	0.190176	0.0574503	-0.448501	0.072565	-0.0857582	0.0231152	0.0353644	-0.332913	-0.403043
218639	0.43106	0.430023	0.426973	0.330476	0.46654	0.411732	1.05197	0.952244	1.17202	0.336292	-0.0656226	0.352844
70575	0.739157	1.21513	0.667829	0.694964	0.699306	0.567082	0.889721	1.14149	1.32267	0.589783	0.879442	0.828593
100046232	-0.612362	-0.829506	-0.701247	-0.384037	-0.766036	-0.464471	-0.598039	-0.446414	-0.404796	-0.663588	-0.678776	-0.342029
20813	-0.156413	-0.329672	-0.179393	-0.0551059	-0.187618	-0.088437	-0.233332	-0.197906	-0.214261	-0.207008	-0.194862	-0.017093
20916	0.61195	0.209935	0.855958	0.824415	0.896856	0.695573	0.423896	-0.0481633	-0.161722	1.51999	0.909549	0.987513
217835	0.736233	0.554513	0.668564	0.809228	0.59221	0.779781	0.674473	0.675698	0.401652	0.536416	0.45207	0.353249
21357	-0.160069	-0.122515	-0.0815008	-0.235904	-0.0301084	-0.14535	0.0339644	-0.0654314	-0.048143	-0.316706	-0.222032	-0.403043
213452	1.16538	1.06175	1.0169	0.990749	1.15447	0.943843	1.20703	1.2358	1.20683	0.956677	1.10855	1.20106
66412	0.936549	2.46146	1.67314	0.839602	1.33634	0.282516	1.44649	1.85325	1.21654	0.964089	1.35381	1.45363
65247	-0.253646	-0.497056	-0.163317	0.131598	-0.267216	-0.512202	0.0549003	-0.0806606	-0.292754	-0.245551	-0.598919	-0.017093
433375	-0.26973	0.0137468	-0.352181	-0.45708	-0.173627	-0.132283	1.05197	1.3626	1.31951	-0.320536	0.198568	-0.0665193
56284	0.059986	0.1336	0.0409788	-0.139599	-0.0858276	0.012468	-0.418775	-0.264812	-0.568744	-0.0506149	-0.115556	-0.344867
59049	0.88976	0.747135	0.87286	1.20554	1.02494	0.698477	1.2561	0.914012	0.93021	0.241418	0.510815	0.688827
59049	1.28527	0.881969	1.02718	1.27062	1.06691	0.903916	0.872056	0.949058	0.790316	0.613501	0.754608	0.666834
64164	0.40213	0.437514	0.342278	0.0751891	0.2948	0.296309	0.158926	0.2972	0.315563	0.167051	0.0459934	0.160983
110959	-0.146178	-0.101588	0.051267	0.495363	0.00444473	-0.032903	0.15958	-0.0583585	-0.19084	-0.0372733	-0.0366695	0.632779
65115	2.21009	1.69027	2.22209	2.15581	2.29635	2.23165	2.36309	2.08646	1.92086	2.40276	2.10355	2.2305
100047047	-0.0291011	-0.5313	-0.100853	-0.0943089	0.0570368	-0.0151176	-0.150533	-0.102325	-0.414291	0.185828	-0.0027468	0.102098
14272	0.0748817	-0.0468932	0.201182	-0.068726	0.142838	-0.16829	0.156963	0.429738	0.384561	0.056118	-0.0399215	0.0666242
52906	-0.64258	-0.768866	-0.491532	0.0600021	-0.205949	-0.149416	-0.13156	-0.153939	0.200356	-0.521277	-0.128039	-0.358347
68625	1.25018	1.74092	1.08965	1.48324	0.56833	0.178707	2.52861	2.74724	2.52439	1.03524	1.58953	1.46853
14860	1.76852	1.93425	2.04205	1.62571	1.85159	1.67021	2.29047	2.18332	2.30763	1.69343	1.84947	1.89208
68737	0.478894	0.461056	0.645048	0.538032	0.610783	0.726062	0.934733	1.24599	1.24355	0.692346	0.689336	0.868323
69068	0.326911	0.447501	0.306678	0.238992	0.329534	0.184787	0.0706023	0.325237	0.282014	0.472673	0.117012	0.580279
15574	-0.462735	-0.528446	-0.521937	-0.33486	-0.464284	-0.566102	-0.526726	-0.722323	-0.871953	-0.396014	-0.538522	-0.373246
16145	-0.763939	-1.01214	-0.338545	0.291423	-0.433788	-0.198779	-0.438403	-0.73889	-0.833466	-0.191972	-0.688322	-0.649938
18793	-0.977414	-1.35315	-1.0731	-1.15279	-1.23929	-1.35084	-1.24378	-1.25821	-1.20871	-1.33734	-1.25742	-1.58998
269470	-0.447382	-0.372719	-0.407737	-0.560496	-0.258051	-0.391152	-0.751787	-0.447972	-0.476958	-0.110899	-0.28812	-0.308968
19679	0.331216	0.515989	0.426789	0.807782	0.727528	0.757277	0.827567	0.613252	1.16252	0.866251	0.626837	0.80518
20016	-0.556496	-0.599074	-0.373737	-0.511801	-0.449088	-0.224913	-0.416812	-0.370588	-0.326303	-0.793298	-0.411669	-0.560545
234857	-0.304091	-0.631891	-0.562356	-0.308102	-0.780508	-0.561747	-0.215304	0.198434	0.409248	-0.587986	-0.466559	-0.38105
20446	1.94587	2.16682	1.69298	1.78409	1.37469	1.17469	0.849157	0.921658	0.826397	1.59411	2.0426	1.82469
100039544	-0.914541	-0.838067	-1.08118	-0.700072	-0.686437	-0.764283	-0.611778	-0.698747	-0.551811	-0.548702	-0.778643	-0.82163
235040	-0.516835	-0.496343	-0.56897	-0.619798	-0.710317	-0.683704	-0.418121	-0.282016	-0.312377	-1.01418	-0.768363	-0.732946
20687	0.698217	0.569495	0.378602	0.52863	0.703648	0.516267	-0.193714	-0.44068	-0.570643	0.454884	0.30227	0.602272
28028	-0.288373	0.307673	0.259972	0.149678	0.323745	0.405199	0.0588258	-0.0443401	-0.202234	-0.0467352	0.246462	0.256762
29849	-0.135212	0.347624	-0.11555	-0.0079779	-0.132863	-0.427449	0.125559	0.491547	0.471915	0.159145	-0.0017371	0.268822
50934	1.59964	1.1923	1.39609	1.15274	1.27748	1.39458	0.974119	0.953518	0.790316	0.960383	1.06449	0.972615
53881	-1.06076	-0.62119	-1.01504	-1.06601	-0.897736	-0.751942	-0.876749	-1.00205	-0.385806	-0.834064	-0.90568	-0.859231
54214	0.389556	0.632418	0.372408	0.697134	0.559647	0.570894	0.801906	1.15041	1.141	0.400221	0.808213	0.847748
54450	4.49471	4.4583	2.34041	4.4194	3.863	0.64258	4.38275	4.02483	4.2212	0.726905	4.19928	2.41851
104086	0.764745	0.732153	1.09406	1.07464	0.7818	0.914805	1.01534	0.917835	1.10935	0.592006	0.470428	1.00241
76645	-0.56049	-0.588373	-0.619571	-0.629922	-0.553018	-0.633977	-0.582664	-0.987399	-1.07135	-1.32252	-1.33893	-0.758487
66922	0.244218	0.148582	0.102561	0.0947152	0.202175	-0.0819036	-0.217267	-0.494842	-0.606724	0.0894721	-0.286468	-0.113439
12496	2.4182	2.50498	2.5087	2.75678	2.63428	2.79425	1.83642	1.84242	1.75818	2.3869	2.85549	2.8002
12642	-0.117666	-1.23472	-1.06134	-0.543863	-0.937535	-1.02054	-1.2778	-1.09445	-1.11566	-0.704354	-0.363755	-1.16076
83815	-1.23914	-1.33888	-1.18994	-1.47606	-1.51644	-1.39294	-1.65923	-2.38733	-2.33369	-1.2358	-1.34407	-1.58502
12957	-0.108893	0.00026335	-0.0709982	-0.236416	-0.300021	-0.192246	-0.286617	-0.230403	0.137689	-0.324118	-0.745599	-0.0513502
110511	0.130901	0.508141	0.213307	0.39484	0.396831	0.247671	0.304103	0.393418	0.430137	0.141356	0.449133	0.28514
214150	-0.688638	-0.329672	-0.38378	-0.680546	-0.539541	-0.415108	-0.267644	-0.38588	-0.0262592	-0.324859	-0.448935	-0.310813
98828	-0.171766	-0.0740029	-0.212554	-0.166357	-0.134853	-0.0376215	0.0764905	0.0404078	0.0376743	-0.100275	-0.111395	-0.0632085
13543	-0.435685	-0.445691	-0.389659	-0.180821	-0.425932	-0.554971	-0.57514	-0.581501	-0.345926	-0.594656	-0.578175	-0.284562
13709	0.262495	0.684354	0.376083	0.349279	0.583816	0.213552	0.206032	0.151918	0.0433713	0.44006	0.228838	0.466055
108012	0.448676	-0.0055153	0.935325	0.633493	0.628391	0.636046	0.822922	0.27681	0.223777	0.849532	0.676771	0.934303
18286	-0.404249	-0.459245	-0.577788	-1.08626	-1.12134	-1.96934	-1.30594	-1.11803	-0.977031	-0.797004	-0.677307	-0.804602
109050	1.16684	0.224203	0.892492	1.08259	1.13855	0.561275	0.902806	0.636447	0.511794	0.604607	0.76856	0.934303
16880	0.161606	-0.0055153	0.217349	0.295039	0.122577	0.212826	0.113128	-0.47254	-0.376943	-0.0320849	-0.157412	0.223417
69940	-0.434954	-0.375776	-0.519916	-0.642217	-0.476585	-0.531983	-0.333069	-0.315788	-0.322505	-0.595768	-0.355971	-0.44774
110350	-0.103044	-0.348666	0.075518	-0.0991	-0.418695	-0.487701	-0.328634	-0.264573	-0.18451	-0.384155	-0.246264	-0.334935
20170	-0.566548	-0.442124	-0.607183	-0.553987	-0.580788	-0.0427867	-0.409616	-0.445379	-0.486453	-0.412321	-0.234515	-0.894705
18115	-0.405711	-0.899421	-0.305883	-0.561219	-0.494676	-0.394782	-0.533923	-0.965734	-1.04603	-0.67693	-0.591393	-0.54139
18115	-0.529994	-1.16053	-0.457268	-0.374907	-0.564868	-0.52182	-0.662155	-0.786043	-0.941583	-0.510159	-0.81389	-0.798217
268512	-0.101582	0.159441	0.375348	-0.0036388	0.0748173	0.0882764	-0.147698	0.251322	0.0610954	-0.149724	0.0393846	0.0925907
72565	0.461754	1.53403	0.517914	0.557799	0.55627	0.407861	0.0306931	0.647661	0.706127	0.848956	0.634017	0.527778
13681	0.00515511	0.0658259	-0.0552902	-0.146831	-0.0518172	-0.110215	-0.0896885	-0.11953	-0.0376532	-0.144006	-0.211017	-0.138767
18300	3.20289	3.75845	3.38173	3.31726	3.47296	3.47373	2.43178	2.22983	2.05886	3.47305	3.20796	3.32095
56784	-0.237563	-0.0575944	0.0953597	-0.151893	-0.154572	-0.32364	-0.117821	0.11496	0.0819846	0.190275	-0.13832	-0.0773978
101358	-0.506599	-0.351203	-0.460942	-0.558326	-0.414354	-0.519764	-0.339611	-0.515869	-0.549754	-0.419074	-0.445356	-0.417517
101943	-1.15214	-0.435703	-1.20008	-1.43266	-1.48243	-1.20057	-0.790388	-0.419652	-0.59533	-1.1261	-0.885119	-1.14231
75764	0.59879	0.807061	0.713392	0.720999	0.741277	0.632417	0.759525	0.857938	0.846021	0.505286	0.60187	0.669672
665586	0.320524	0.351547	0.182626	0.517782	0.307584	0.792641	2.64899	2.33115	2.2247	0.37434	0.287257	0.323057
64450	0.200353	-0.0561675	0.0811765	0.0233363	0.190597	0.16927	-0.603273	-0.169869	-0.372512	-0.383414	-0.0641539	-0.0738505
434350	0.312208	0.0529845	-0.142741	-0.279898	-0.0315556	0.388502	0.253792	-0.0264984	-0.0743675	-0.570938	0.118691	0.0957123
76071	0.136749	-0.320962	-0.468659	-0.895334	-0.316031	-0.352574	-0.445963	-0.619813	-0.0927246	-0.284834	-0.573769	-0.278975
66284	4.66066	4.32204	-0.868799	3.48576	1.10333	0.447303	1.05629	-0.524153	1.0053	-0.163277	4.17211	1.84928
68312	0.348762	-0.425715	0.27026	0.0867601	0.477877	0.397214	0.865513	0.524681	0.550408	0.234747	0.267757	0.404331
68312	0.391895	-0.559123	0.0358346	-0.192392	-0.122732	0.270901	0.608394	0.186327	0.535216	-0.531654	-0.399002	-0.233481
12055	0.284009	0.398276	0.409428	0.310949	0.268387	0.175924	0.296972	0.0136453	0.310499	0.076779	0.0423219	0.224126
72026	0.0850051	0.88411	0.384901	0.105834	0.380704	0.132973	1.4177	1.25664	1.14932	-0.0657169	0.0459934	-0.147635
14299	0.353148	-0.0219238	0.234252	0.25888	0.295523	0.253478	0.436981	0.250047	0.294041	0.0805777	-0.0575451	0.200004
14299	-0.0628352	-0.689678	-0.698308	-0.547479	-0.446193	-0.719275	-0.0216467	-0.127176	0.128827	-0.551667	-0.984986	-0.762744
232370	-0.992766	-0.964341	-1.39571	-1.12314	-1.17199	-1.21436	-0.713187	-0.618459	-0.680153	-1.04415	-1.10394	-0.628654
68925	-0.808535	-0.554129	-0.773265	-0.847603	-0.647361	-0.928344	-0.360547	-0.483372	-0.343394	-0.620598	-0.645732	-0.55416
15218	1.41614	1.10241	1.05144	1.69658	1.30402	1.01644	1.74417	1.54612	2.07088	1.26057	1.04466	1.54728
69123	0.209126	0.31124	0.176196	0.22263	0.380911	0.266545	0.418662	0.279996	0.429504	0.422271	0.264085	0.549772
15932	0.447457	0.287697	0.239396	0.483069	-0.085104	0.321716	0.212574	0.368567	0.0959106	-0.0483913	0.24279	0.102807
16183	-0.270461	-0.108247	-0.173605	-0.187329	0.0190982	-0.0274585	0.110511	0.0834543	-0.0077754	-0.41158	-0.25067	-0.408719
14852	0.141867	0.152149	0.0108488	0.191623	0.0656816	0.130795	-0.112587	-0.255254	-0.483921	0.430424	0.249399	-0.0235965
71276	-0.122052	0.151435	-0.294125	-0.423813	-0.105366	-0.309121	-0.0942682	0.108588	0.0857826	-0.0187433	-0.0634196	-0.0646274
432508	-0.736158	-1.21618	-0.444775	-0.857004	-0.449088	-0.763557	-1.5925	-1.72146	-1.63282	-0.359696	-0.492994	-1.07349
16582	0.256646	0.268435	0.337134	0.208256	0.173954	0.342768	0.322488	0.532328	0.633331	0.294044	0.396996	0.131895
19063	-1.47162	-1.02569	-1.25314	-1.04503	-1.16765	-1.79729	-2.09234	-1.99163	-1.97401	-0.868159	-1.21483	-1.06072
71434	0.967985	0.385435	0.947817	0.935064	0.832453	1.04351	1.24956	1.16316	1.24102	0.920358	0.94039	1.19397
195018	-0.568741	-0.735336	-1.13115	-0.64077	-1.36013	-0.923988	-1.04489	-0.197906	-0.505443	-0.894101	-0.507681	-0.654195
233189	0.228865	0.31124	0.246173	0.218291	0.302759	-0.0855333	0.0280762	0.3246	0.246566	0.212511	0.402871	0.215612
71711	-0.146178	-0.362935	-0.408766	0.0115482	-0.111878	-0.0804517	0.0261134	-0.271821	-0.0446163	-0.197373	-0.248467	-0.271083
245688	-0.17563	-0.301581	-0.148987	-0.0860826	-0.191332	-0.205222	-0.222501	-0.591059	-0.58689	-0.145383	-0.359349	-0.289326
66526	0.36777	0.653678	0.769977	0.828031	0.809297	0.688314	0.514837	0.65021	0.572563	0.803249	0.828774	0.664705
20295	-1.56959	-1.5365	-1.48463	-0.947403	-1.34855	-1.09894	-1.74036	-2.32489	-1.81513	-1.30992	-0.628108	-0.767
230904	-1.06295	-1.12843	-1.30899	-1.07179	-1.11917	-1.22235	-0.56271	-0.730607	-0.710537	-1.08311	-1.05107	-1.00042
100044725	-0.511717	0.0986429	-0.11849	0.0404759	0.186979	-0.662652	0.17659	-0.0972278	0.0142531	-0.287058	0.0724288	-0.609499
74098	0.253722	0.164277	0.172522	0.155463	0.227502	0.291953	0.00059774	-0.158399	-0.340229	0.331845	0.280974	0.340479
279766	0.4767	0.443221	0.241968	0.570782	0.394479	0.428221	0.72027	0.413808	0.39279	0.316609	0.369722	0.41923
231440	1.12471	2.28382	0.992369	0.96771	2.23701	1.51816	1.18348	1.04974	0.965025	1.73494	2.11383	1.00889
668924	0.101657	0.245606	0.380584	0.568406	0.424972	0.519171	0.0980807	0.0384962	-0.177547	0.456737	0.553406	0.462507
50884	0.349493	-0.325124	0.756014	0.403518	0.459786	-0.218379	0.129485	0.157016	0.0591964	0.420048	0.109145	0.00206259
53314	-0.517566	-0.816665	-0.898195	-0.779623	-0.92451	-0.419463	-0.677203	-1.13268	-1.1663	-0.66507	-0.675105	-0.918827
231842	-0.549733	-0.615483	-0.668178	-0.113564	-0.143718	0.068365	-0.115139	-0.493567	-0.777635	-0.135112	-0.18047	-0.272501
231440	2.12647	1.66342	2.10975	2.41905	2.15907	2.5184	1.64538	1.65763	1.60563	2.37459	2.04933	2.10193
668786	0.84955	0.683213	0.423197	0.32003	0.411122	0.363385	1.04478	1.12939	0.884563	0.556058	0.578281	0.445303
266692	0.2391	0.620861	0.553188	0.559004	0.56037	0.381243	0.368285	0.208629	0.676375	0.14358	0.189919	0.463217
12405	-0.0043489	-0.146771	-0.151559	0.0997776	-0.329689	-0.32727	-0.0102441	-0.6911	0.318095	0.244383	-0.17577	0.0495969
12427	0.86271	0.34049	-0.158173	0.0947152	0.435907	0.384873	0.139364	0.0966728	-0.180079	-0.0231905	0.229572	0.692375
12554	0.491139	0.748561	0.662685	1.08404	0.684834	0.264367	0.725141	1.26192	1.30811	-0.0467352	0.526787	0.769707
243529	0.969447	0.699336	0.550984	0.68267	0.614642	0.603379	0.824296	0.33607	0.870075	-0.0943458	0.261882	0.206389
241715	-0.380854	-0.67755	-0.397743	-0.735508	-0.340544	-0.598679	-0.573832	-0.638212	-0.604825	-0.299658	-0.543019	-0.501926
230233	-0.714226	-0.875878	-0.578645	-0.40689	-0.498475	-0.382199	-0.518221	-0.568616	-0.387072	-0.279646	-0.209548	-0.459294
13014	-0.190043	-0.31799	-0.258116	-0.37195	-0.229286	-0.298751	-0.108335	0.171671	0.188962	-0.316459	-0.658215	-0.483213
94176	-1.25669	-1.33318	-1.26482	-1.15026	-1.26107	-1.07362	-1.22285	-1.82405	-1.45622	-1.12165	-1.23245	-1.33457
13113	3.23378	3.67997	3.35381	3.10681	3.37745	3.31765	2.51683	3.07285	3.04571	3.26626	3.07137	3.20247
67690	-0.577758	-0.41002	-0.471966	-0.631369	-0.809453	-0.63915	-0.332414	-0.0481633	-0.503544	-1.43073	-0.700071	-0.714185
13614	0.585631	0.76711	0.498807	0.359403	0.310719	0.403747	-1.04882	-0.342551	-0.406695	0.380023	0.487317	0.249667
13821	-0.996422	-0.429282	-0.750484	-0.827354	-0.77689	-0.743231	-0.735867	-0.402448	-0.595963	-0.605774	-0.678776	-0.795379
100048880	-0.333334	-0.394325	-0.0530856	-0.265434	-0.0894457	-0.226365	0.268839	0.499193	0.507996	-0.426404	-0.459216	-0.576863
14012	1.34741	1.78515	1.55685	1.3386	1.5995	0.948198	1.1259	1.64679	1.69551	1.52518	1.41255	1.26492
218210	-0.240487	-0.481361	-0.130983	-0.416581	-0.33186	-0.492783	-0.676549	-0.720411	-0.79979	-0.314482	-0.595064	-0.608789
218210	-0.943784	-1.21475	-0.721089	-0.843264	-0.627823	-1.014	-0.705336	-0.625468	-0.666226	-0.476064	-0.66923	-0.848589
69895	-0.585556	-0.205984	-0.701982	-1.16074	-0.821031	-0.825987	-0.435131	0.180592	-0.0496803	-0.608739	-0.88365	-0.810987
258938	-0.260226	0.299825	-0.571174	-0.152616	0.0169273	0.370354	0.497826	0.172875	0.23264	0.011646	-0.0847148	-0.0979724
70186	-0.386946	-0.223998	-0.940083	-1.14483	-0.6271	-0.473425	-0.235077	-0.369313	-0.252242	-0.333939	-0.290813	-0.25669
219151	0.867096	1.03678	1.00293	1.02474	1.11033	0.911176	0.377445	0.0971188	0.22441	1.01523	0.862552	0.934303
17698	-0.436416	-1.50011	-0.636088	-0.743464	-0.558355	-0.871802	-0.444291	-0.861233	-0.583303	-0.704354	-0.960753	-1.02808
171244	-0.0526001	-0.584093	-0.153764	-0.480222	-0.0438573	0.234604	-0.222864	0.123244	-0.192106	-0.118064	-0.166224	0.0197993
232339	-0.489785	-0.212405	-0.74534	-0.390546	-0.217528	-0.28081	-0.371669	-0.588511	-0.3972	-0.354507	-0.43278	-0.332097
20932	-0.215338	0.277709	-0.156115	0.100501	-0.18207	0.175803	-0.174086	-0.0902186	-0.205399	-0.0880455	0.00634038	0.0396644
20932	-0.357021	-0.219743	-0.160672	-0.0643868	-0.214922	-0.266473	0.0418154	0.153193	0.1801	-0.343945	-0.313087	-0.254853
433766	0.598059	0.25488	0.305535	0.857411	0.524913	0.637498	1.17628	1.49323	1.32964	0.924805	1.11736	0.610786
18440	1.22898	0.322654	1.46297	1.58594	1.22393	1.00918	2.00652	1.26256	1.39863	1.0182	0.999869	1.04569
72836	-1.00519	-0.485642	-0.429343	-0.887378	-0.732749	-0.642325	-0.0739865	0.389595	-0.272498	-0.324859	-0.680245	-0.640006
258060	0.0555995	-0.565544	-0.0876248	-0.37257	-0.277588	-0.381473	-0.234931	-0.217659	-0.358507	-0.431592	-0.476105	-0.928759
22240	0.433567	0.260587	0.562889	0.496086	0.429394	0.388067	-0.331106	-0.225943	-0.0661384	0.331739	0.401402	0.530616
239552	-0.773169	-0.596934	-1.65953	-1.76244	-1.82253	-0.516013	0.45072	-0.796238	-0.910566	-1.28916	-2.33466	-1.78083
258951	0.32025	0.180685	0.118141	0.389054	0.577737	0.199033	0.064714	1.08645	1.39484	-0.0780393	0.506409	0.250376
24044	0.363383	0.490306	0.373143	0.633493	0.483183	0.532157	0.823642	0.715205	1.09922	0.235489	0.377904	0.612047
26410	-0.105969	0.842018	0.243805	0.538755	0.323021	0.188144	0.522688	1.37981	1.22899	0.2177	0.381576	0.568218
58234	1.62376	1.73592	1.83996	1.63728	1.89401	1.6647	1.60154	1.71561	1.97847	1.84315	1.82451	1.6537
75732	0.0439022	0.377587	0.165908	-0.137429	0.0885662	-0.0935186	0.317254	0.290828	0.221878	-0.0335673	0.229572	0.360344
105732	1.05498	1.11426	0.617123	0.59209	0.975008	-0.361389	1.45368	1.35814	1.23682	0.260689	1.18859	0.945229
65256	2.542	2.01415	2.50135	2.48486	2.35062	2.40951	2.62086	2.30821	2.40068	2.23525	2.3936	2.54976
114479	0.848088	0.0843746	-0.0817458	0.129428	-0.123456	-0.203861	0.187958	0.0643383	0.19691	0.0961429	-0.141257	0.196457
76800	0.113355	0.632989	-0.319846	0.199578	0.087119	0.432059	0.461842	0.514486	0.600415	0.294785	0.411683	0.341188
52187	0.527145	0.19424	0.62341	0.893118	0.914947	0.768892	0.80336	0.792306	0.659917	1.09973	0.510081	0.849167
78255	-0.253646	0.276282	-0.103057	-0.225659	-0.0822094	-0.192972	0.0352729	0.031487	0.0243812	-0.24481	-0.0083459	-0.126351
66411	0.0919097	0.172838	0.379757	0.176797	0.168889	0.204599	0.425859	0.543797	0.548509	0.466743	0.144539	0.378081
68277	0.134556	0.301252	0.458389	0.373144	0.694241	0.5228	0.637181	0.894258	0.746006	0.589041	0.647398	0.57886
214240	0.117741	0.022932	-0.180219	-0.160881	-0.0313747	0.0290193	0.0895755	-0.0415788	0.0161521	0.0368468	0.126034	0.202842
665113	0.112624	-0.295161	0.109322	-0.361619	-0.1003	-0.736697	-0.19306	-0.27883	0.141487	0.117638	0.154672	0.0744283
237339	0.772056	0.696554	0.685466	1.08693	1.09875	1.04693	0.757563	0.678247	0.997309	1.0093	1.01676	0.954878
629147	2.80811	2.2115	3.44346	3.71356	3.34995	3.11657	3.3896	3.33602	3.20966	4.00079	3.57511	3.8339
79566	0.565161	0.863421	0.503217	0.483069	0.369333	0.298486	0.35978	0.910189	0.877671	0.216959	0.579107	0.519974
15182	-0.695218	-0.766726	0.195303	-0.784685	-0.167597	-0.847765	-0.703373	-0.823638	-0.811184	-0.17736	-0.739724	-0.764163
70771	-0.619917	-0.439983	-0.305883	-0.273389	-0.309428	-0.202409	-0.580374	-0.153939	-0.207298	-0.102499	-0.0707628	0.0957123
68975	-0.43203	-0.555556	-0.333221	-0.256394	-0.295438	-0.394056	-0.295122	-0.437494	-0.490884	-0.167725	-0.392026	-0.189494
15360	2.33803	1.78943	1.58716	2.14135	1.71311	3.06866	1.4105	2.19033	1.86199	1.59115	1.9978	1.12089
104444	-0.396207	-0.209075	-0.137596	-0.202998	-0.430273	-0.577717	0.134719	0.374939	0.555472	-0.235915	-0.436452	-0.202353
22213	0.0380536	-0.429995	0.410622	0.211872	0.169612	-0.356307	0.766722	0.711382	0.71942	-0.327083	-0.323367	-0.0802357
16206	0.595866	0.851293	0.997054	0.643721	0.771669	0.639883	0.676436	0.314405	0.290243	0.776565	0.939656	0.947074
19259	-0.442996	-0.0311981	-0.359529	-0.71092	-0.0988528	-0.503672	-0.244091	0.160202	0.144019	-1.20837	-0.528976	-0.216453
243659	1.20193	1.50192	0.952962	0.794041	0.912776	0.83713	0.690175	1.2409	1.16062	0.846238	1.18565	1.09181
71804	-1.00812	-0.878018	-1.36337	-1.35962	-1.27113	-1.10547	-1.0076	-1.64499	-1.62523	-1.26396	-1.30074	-1.59566
228993	-1.05345	-0.698238	-1.13189	-1.17666	-1.23567	-0.598043	-1.72138	-1.58955	-1.51888	-1.32252	-1.49387	-1.19197
104263	-1.25303	-0.905128	-1.05913	-1.20414	-1.17344	-1.07426	-1.33603	-1.0919	-1.00298	-1.30176	-1.1671	-0.852846
228139	-0.747855	-0.649726	-0.343362	-0.696456	-0.424484	-0.802757	-0.0720238	-0.138646	0.0199501	-0.157348	-0.426906	-0.476119
100045214	-0.458348	-0.118234	-0.464617	-0.387653	-0.329689	-0.252498	-0.304936	-0.36103	-0.449106	-0.394995	-0.136117	-0.178852
27355	0.685789	0.570922	0.711922	0.532246	0.728975	0.830597	0.804014	0.597252	0.691568	0.629808	0.546797	0.688118
27416	-0.230252	-0.906555	-1.12086	-1.10434	-1.01713	-0.883336	-0.637948	-0.339365	-0.316175	-0.969704	-0.9211	-0.852846
27416	-0.406651	-0.661854	-0.900399	-0.366681	-0.737814	-0.455276	-0.465881	-0.075563	0.0167851	-0.465687	-0.627374	-0.561176
74204	-0.014584	0.0786673	-0.136862	-0.261095	-0.245749	-0.306218	-0.494668	-0.0927674	-0.145264	-0.566491	-0.287386	-0.481085
217707	-0.115655	-0.380057	0.237191	0.00793229	-0.0691842	-0.343966	0.0902297	-0.212561	-0.215527	-0.231468	-0.147132	-0.110033
50783	-0.417042	-0.287313	-0.346302	-0.508788	-0.178452	-0.186257	-0.0785663	-0.13992	-0.24338	-0.219238	-0.404436	-0.277468
271278	0.459886	0.0751003	0.257033	-0.186606	-0.191477	0.139507	-0.163619	0.244312	0.0800855	0.152474	0.323565	0.105645
54638	-0.189938	-0.0703169	-0.0464717	-0.125135	0.00607289	-0.148932	0.0437781	0.123244	0.1168	-0.274754	-0.221298	-0.103648
207686	-0.415215	-0.777427	-1.24653	-1.12675	-1.52295	-1.12776	-1.14761	-1.17474	-1.20808	-1.18243	-0.686119	-0.933725
56275	0.0184364	0.314807	-0.222527	-0.158402	-0.106957	-0.100342	0.213228	0.227108	0.0180511	-0.115594	-0.0792074	-0.0490191
66765	-0.534381	-0.616909	-0.394069	-0.183713	-0.438233	-0.849217	-0.132869	-0.433033	-0.634576	-0.716955	-0.319696	-0.215035
56429	2.86806	2.67406	2.83645	2.72858	2.78552	2.94298	3.42362	2.87659	2.99444	2.78077	2.82774	2.90726
636687	-0.664512	-0.154618	-0.559416	-0.566282	-0.655321	-0.426723	-0.813941	-0.711491	-0.30668	-0.324118	-0.263888	-0.337772
66931	-0.81877	-1.06137	-1.28988	-0.857004	-1.02075	-0.722904	-1.01676	-0.784132	-0.93462	-0.76365	-0.904211	-0.944367
67009	-0.157144	0.183539	0.182075	0.208979	0.171783	0.322442	0.0195709	-0.0711025	-0.0123331	0.02647	0.0180894	0.397946
12966	-0.277772	-0.0433261	0.0596446	-0.466481	0.0950789	0.424799	0.0889212	0.433561	0.123067	-0.298176	-0.173567	0.385885
13074	0.051213	0.126466	0.110792	0.107733	0.145371	0.249849	0.321833	0.404887	0.191494	0.329621	0.0841778	0.19149
13190	0.786678	2.16754	1.20912	0.892395	1.86145	0.805915	2.7733	1.46455	1.32141	0.752847	1.08358	1.22306
258764	-0.0716081	-0.109673	-0.562356	-0.0745115	-0.0315556	-0.0361697	-0.0811832	-0.299221	0.261758	-0.0209669	0.0246983	-0.350543
223864	-1.06003	-0.584093	-0.994463	-0.859463	-0.870744	-0.817034	-0.912732	-0.681542	-0.734401	-0.917079	-0.833808	-0.946496
16763	2.93458	3.07072	2.75341	2.86722	2.63376	2.65015	3.07622	2.78739	2.79694	2.88899	2.75415	2.70354
13850	2.89145	2.58679	2.56108	2.36244	2.27226	2.17321	2.34084	1.84928	1.99595	2.20649	2.8386	2.27307
140494	1.14052	1.11169	0.736908	0.762221	0.00317839	-0.160305	2.42956	3.09261	2.82226	-0.070442	0.86549	1.29684
228812	0.0651035	-0.0597346	0.445896	0.0722963	0.442419	-0.066659	-0.402419	-0.522242	-0.45417	0.10652	-0.217626	-0.0575327
257734	0.127245	0.489593	0.193098	0.114241	0.409856	-0.264839	0.170048	0.130253	0.106039	0.0531532	0.0709602	0.24541
257734	-0.121078	-0.135119	0.614183	-0.236506	-0.28989	-0.0231028	0.501097	0.264066	-0.116146	-0.209973	0.236181	-0.679736
70357	0.125783	-0.024064	0.175461	1.04716	0.617537	0.0959505	-0.488125	0.0862863	-0.545956	-0.151418	0.159812	0.270241
216136	-0.502944	-0.604068	-0.456778	-0.480222	-0.457048	-0.332351	-0.370361	0.112412	0.159844	-0.692495	-0.505478	-0.456963
18362	-0.281219	-0.44355	-0.666708	0.247309	-0.448364	-0.624177	-0.0020193	-0.117618	-0.202867	-0.155865	-0.0149548	-0.286691
17939	-0.218555	-0.211691	-0.398478	-0.285683	-0.323177	-0.292425	0.221734	0.283819	0.537115	-0.410097	-0.23525	-0.405172
665057	-0.173959	-0.224533	-0.334838	-0.414845	-0.26794	-0.379537	-0.353808	-0.475726	-0.36773	-0.321647	-0.405244	-0.353381
70730	0.263957	0.462483	0.522323	-0.0065315	0.514782	0.206293	-0.0798747	0.21755	0.0750215	0.593489	0.34486	0.505785
77310	-0.541691	-0.350807	-0.471231	-0.545309	-0.702598	-0.791868	-0.988625	-0.438768	-0.483288	-0.597621	-0.34246	-0.506626
70546	-0.631614	-0.793122	-0.846018	-0.749249	-0.923063	-0.845587	-0.700756	-1.21042	-1.18149	-0.847406	-0.821968	-0.930888
21408	0.00223079	0.00090542	0.0799273	0.0665108	-0.0901693	-0.219105	-0.231006	0.283819	0.0275462	-0.0372733	-0.0208293	-0.0795262
320595	-0.270461	-0.398605	-0.0890945	-0.84688	-1.77839	-0.461568	-0.624863	-0.218933	-0.137668	-0.42418	-0.302072	-0.586796
140630	0.24568	0.569495	0.404008	0.540201	0.309996	0.605557	2.21719	2.54079	1.74729	0.305162	0.659881	0.623556
667182	-0.176152	-0.0083689	-0.0452119	-0.200347	0.0181333	-0.18426	-0.504482	-0.234162	-0.430116	0.0497649	0.049665	-0.121917
245403	0.563699	0.936902	0.687671	0.681513	0.585697	0.94965	0.790929	0.931216	0.720369	0.709116	0.95067	0.534873
26457	-0.573859	-0.725348	-0.355304	-0.277728	-0.316302	-0.441242	0.344078	-0.0570841	-0.0162366	-0.762909	-0.6964	-0.72727
57370	-0.940129	-0.499196	-1.00769	-0.773837	-1.00845	-0.914551	-0.654304	-0.790504	-0.528231	-1.07347	-0.456278	-0.646391
63955	1.5838	1.77068	1.56193	2.10085	1.61385	1.51661	1.8567	1.72326	1.62525	1.93506	1.59531	1.64647
271457	0.0534063	-0.447117	0.140187	0.160445	0.147904	-0.169742	-0.349425	-0.294123	-0.55102	0.26384	0.0665543	-0.073141
629065	0.11701	-0.0083689	0.226903	0.18873	0.0408069	-0.0492365	-0.319984	-0.0341448	0.00982208	0.196205	0.0577425	0.253214
66071	0.0519441	-0.0042923	-0.0048986	-0.374636	-0.105366	-0.293151	0.348003	0.858575	0.437416	-0.120584	0.057218	-0.062499
11423	2.01562	1.08886	2.25296	2.20137	2.2978	2.2861	2.50113	2.06544	2.52538	2.40869	1.88839	2.36175
76082	0.189387	0.224917	-0.0192812	-0.0723419	0.121853	-0.0978742	-0.148571	0.0155569	0.159211	-0.178101	-0.501072	0.0907461
67886	-0.0043489	0.432044	0.116028	0.0825114	0.176849	-0.123282	-0.136794	0.406799	0.322807	0.386376	0.340454	0.219869
66293	-0.591405	-0.212405	-0.815153	-0.69745	-0.860831	-0.637171	-0.678512	-0.304318	-0.349091	-0.831841	-0.586416	-0.498112
226562	-0.441534	0.199234	-0.131717	-0.0318432	0.0379124	-0.0782739	0.543623	0.322051	0.575728	-0.0617329	-0.107479	0.419939
14205	-0.619186	-0.900848	-0.615083	-0.401394	-0.607079	-0.451405	-0.294468	-0.48847	-0.546589	-0.569307	-0.722206	-0.529506
11889	-1.18577	-0.456392	-1.36558	-1.70097	-0.46356	2.2469	-1.45118	-1.48378	-1.53091	-0.920044	-1.18031	-1.51123
14430	0.17312	-0.0432072	0.143372	0.14069	0.178296	0.250091	0.258371	0.215447	0.197191	0.409671	0.0772753	0.0380089
12124	1.19462	1.36138	1.21825	1.62354	1.68271	1.55072	0.0450866	0.444394	0.147817	1.36953	1.26569	1.33373
78798	-0.228059	-0.37863	-0.26767	-0.320397	-0.294955	-0.182083	-0.395222	-0.396713	-0.251609	-0.180325	-0.316758	-0.357638
258433	0.0497509	0.690062	0.207061	-0.0303968	0.28684	-0.0318141	0.158926	0.407436	0.340883	-0.0498737	0.021761	0.310681
80752	-0.257302	-0.273758	-0.0572849	-0.0643868	0.00752014	-0.288588	-0.382792	-0.623557	-0.581404	0.0212816	-0.0927922	-0.0888506
15424	0.505944	0.423959	0.539226	0.652296	0.665296	0.402295	-0.327835	-0.121441	-0.000306	0.0991077	0.416823	0.239025
21580	-0.0901287	-0.250725	-0.153554	-0.109948	-0.0504905	-0.497138	-0.0606562	-0.0249691	-0.123461	-0.237398	0.0570082	-0.100101
193740	2.51403	2.81175	2.57753	2.58911	2.57265	2.51967	2.45992	2.59431	2.60008	2.53565	2.48196	2.64483
18642	0.874094	-0.422148	1.03793	1.092	1.02011	1.0989	1.44869	1.36706	1.45244	0.958901	1.19006	1.19194
18750	-1.22744	-1.06993	-1.15908	-1.1282	-0.944771	-1.17444	-1.16069	-1.71572	-1.98667	-0.855559	-1.40281	-1.30194
270162	0.376543	0.273429	0.986031	0.438954	1.02928	0.680111	1.03475	1.527	1.36318	0.699163	1.26569	0.830924
67544	-0.698873	-0.345813	-0.509444	-0.486731	-0.315941	-0.682978	-0.43644	-0.656054	-0.742187	-0.379708	-0.205877	-0.443483
20482	0.566623	0.184966	0.314353	0.320351	0.142838	0.134607	0.0496663	0.037859	-0.204133	0.14358	0.228104	0.142774
71834	0.204739	0.259874	-0.0391229	0.39267	0.241251	0.276708	0.48147	0.899675	1.13024	0.167298	0.254539	0.523521
109593	-0.38451	-0.258063	-0.0883597	-0.21105	-0.184964	-0.286617	-1.14761	-0.150116	-0.212362	-0.519054	-0.4974	-0.271437
384864	-0.788796	-1.33175	-0.596895	-1.00092	-0.727684	-0.901484	-0.71057	-1.04857	-1.00109	-0.618375	-1.05915	-1.02241
72058	3.6196	0.667946	0.406948	0.522121	-0.0033342	2.65415	-0.469152	1.21732	0.60365	0.410412	2.81216	0.129057
20393	-0.890854	-1.00049	-1.73816	-0.0267809	-1.00628	-1.37697	-1.44464	-1.12312	-0.774048	-0.847406	-0.691406	-0.678672
73873	0.49644	0.914786	0.411357	0.438954	0.333875	0.214278	-0.213341	-0.160311	-0.482655	0.283667	0.370561	0.346154
27205	0.171841	-0.0740029	0.103443	-0.0737883	0.368609	0.249123	0.209957	0.51576	0.197191	0.0146108	0.281709	0.344736
20618	2.80665	1.28861	2.10378	2.38795	2.50837	2.43274	2.37683	1.96603	2.13292	2.68368	2.39287	2.29081
100046684	0.501244	0.488472	0.675913	0.572473	0.4112	1.06217	1.49425	1.40083	1.44294	0.508745	0.578648	0.586664
74617	-0.969372	-0.9515	-0.960496	-1.17882	-1.05838	-1.20275	-1.12144	-0.928139	-0.67952	-0.932459	-1.18839	-1.28917
100044735	-0.513179	-0.681117	-0.735052	-0.603164	-0.769654	-0.993678	-0.447562	-0.520967	-0.724463	-0.308553	-0.43278	-0.364732
76448	-1.4029	-1.3981	-1.25608	-1.41914	-1.18987	-1.19113	-1.54997	-1.50927	-1.31569	-1.18363	-1.23849	-1.30691
66722	-0.385241	-0.370069	-0.549863	-0.33703	-0.296041	-0.140497	-0.0068443	0.0243867	-0.177547	-0.302623	-0.0531392	-0.161647
76967	-0.481889	-0.513821	-0.629964	-0.527953	-0.814519	-0.671363	-0.63664	-0.819178	-0.821312	-0.627022	-0.58919	-0.642844
76967	-0.726654	-0.484928	-0.752689	-0.820122	-0.666175	-0.87898	-0.677203	-0.882261	-1.00995	-0.673224	-0.76616	-0.724432
12309	1.17561	1.30859	0.358446	0.951697	1.33393	2.67447	-1.30986	0.18923	-0.0696199	0.46452	0.399934	0.829302
77305	-0.335405	0.125753	-0.161112	-0.103439	0.00462564	0.0269867	-0.273532	-0.211924	-0.309845	-0.222574	-0.1486	-0.292366
67302	0.129682	0.383294	0.0137883	0.148955	0.22099	0.485778	0.7556	0.655945	0.803609	0.0472236	0.266288	0.32558
83669	0.242755	0.116478	0.093155	0.159802	0.187703	-0.150142	-0.330452	-0.549004	-0.463032	-0.332271	-0.0428588	-0.054411
22589	-0.0957337	-0.606922	-0.169931	-0.162018	-0.282654	-0.378085	-0.463918	-0.762467	-0.726995	-0.111393	-0.468027	-0.559126
675933	-0.0365163	-0.105393	-0.109671	-0.0853594	-0.239236	-0.208942	-0.261756	-0.357843	-0.193372	-0.227762	-0.31015	-0.298752
18390	-0.54754	-0.492062	-0.335278	-0.391993	-0.580788	-0.651763	0.00313295	0.0244778	-0.419988	-1.77168	-0.281511	-0.431422
631037	2.24006	2.75325	2.75709	2.51813	2.77756	3.03671	1.7638	1.77296	1.83098	2.8749	2.73139	2.85058
13353	0.184415	0.410523	0.0826218	0.289357	0.125471	0.143717	0.0817245	0.134076	0.318728	0.059824	0.247441	0.420547
67610	0.143329	0.319801	-0.0810109	-0.0745115	0.0768435	0.0640094	-0.215304	-0.373773	-0.235404	0.215476	0.151735	0.237606
67610	-0.0409028	0.0751003	-0.17581	-0.119349	0.0133092	-0.134171	-0.285309	-0.499302	-0.606724	-0.0150373	-0.219829	-0.0993913
76251	0.201084	-0.0176433	0.299656	0.140999	0.157311	0.0661872	0.226313	0.139811	0.18643	0.359269	0.184045	0.216322
13495	-0.490516	-0.50205	-0.719619	-0.598102	-0.620024	-0.669911	-0.482237	-0.470628	-0.115513	-0.810346	-0.611953	-0.599566
226747	-0.848013	-0.731769	-0.749749	-1.01683	-0.901354	-0.849217	-0.803473	-0.698747	-0.828908	-0.84963	-0.760285	-0.853556
244710	-0.57459	-0.49991	-0.596895	-0.648002	-0.493229	-0.605847	-0.825063	-0.742713	-0.570643	-0.606516	-0.538627	-0.495097
231855	-0.306284	-0.213832	-0.437426	-0.719598	-0.698739	-0.533435	-0.310824	-0.342551	-0.426318	-0.756238	-0.503275	-0.463348
259023	0.319519	0.560934	0.0666995	0.0329728	0.275985	0.0577482	0.447449	-0.249519	0.113635	-0.152159	0.315487	0.255343
17117	-0.436416	-0.688964	-0.423464	-0.391269	-0.341268	-0.37869	0.155	-0.37696	-0.263636	-0.132147	-0.411926	-0.273211
17164	-0.275579	-0.718927	-0.119959	0.00142357	-0.108984	-0.397685	0.0653683	-0.2629	-0.168052	-0.407874	-0.353474	-0.339191
72344	-0.0942715	0.217069	-0.343362	-0.15117	-0.183517	0.122084	0.686249	0.933765	1.29609	0.204173	0.244259	0.163821
70646	-0.22221	-0.213832	-0.336748	0.00648591	-0.0264903	-0.217653	-0.141374	-0.32216	-0.244646	-0.0254141	-0.214689	0.108483
18168	-1.985	-1.84683	-2.76699	-2.19925	-1.68721	-1.96643	-2.16431	-2.25224	-2.11201	-2.14673	-2.23846	-2.45482
20823	-0.494171	-0.26163	-0.444775	-0.351654	-0.122009	-0.182083	-0.107353	-0.147567	-0.387705	-0.129182	-0.314556	-0.344158
18256	-0.220017	0.203514	0.18134	0.109179	0.326639	-0.0673849	0.0719107	0.253233	0.397221	-0.376002	0.220026	-0.208649
18412	-0.415337	-0.657812	-0.326985	-0.345708	-0.405153	-0.290558	-0.435713	-0.475025	-0.0661384	-0.349319	-0.692728	-0.630073
666756	-0.558628	-0.653864	-0.596711	-0.564835	-0.433891	-0.610239	-1.19864	-1.32066	-0.914012	-1.30992	-0.977643	-0.781332
218165	0.475969	0.220815	0.514975	0.241523	-0.0576062	0.458192	2.0569	0.973431	0.797279	-0.292246	0.361749	0.329127
22437	2.67067	1.61464	2.79236	2.81608	2.88393	2.74997	2.77723	2.66122	2.53994	2.87565	2.64033	2.86264
75480	-1.87079	-2.2121	-2.52154	-1.95553	-1.98317	-2.23721	-2.06028	-2.08381	-1.94276	-1.93845	-2.28913	-2.26965
75604	1.73635	-0.305148	-0.68508	-0.389823	-0.600325	0.00811237	-0.942828	-0.940883	-0.458601	-0.737708	1.36115	-0.200136
544752	-0.148371	-0.243795	-0.0932099	-0.175487	-0.0576062	-0.275547	-0.386063	-0.36995	-0.335798	-0.0602505	-0.237893	-0.0632085
105855	-1.37658	-1.28725	-1.32736	-1.22222	-1.61702	-1.13451	-1.64222	-1.97506	-2.10441	-1.51819	-1.43218	-1.50059
108062	-1.05637	-0.925817	-1.04884	-1.29598	-1.16982	-1.10765	-0.51037	-0.458521	-0.568744	-1.12387	-1.00922	-1.10668
111173	-0.141792	0.484599	-0.255912	-0.0238881	0.5184	0.117729	-0.250895	0.136534	0.632065	-0.0617329	0.0511336	-0.398077
11593	-1.14483	-1.43733	-1.00034	-1.09855	-1.06345	-1.29422	-1.58007	-1.52838	-1.62396	-1.20244	-1.27945	-1.11677
230075	0.0197767	0.048704	0.536286	0.61469	0.0444251	-0.0789998	-0.0242637	0.510026	-0.159823	0.249324	0.336048	0.314228
11774	-0.610413	-0.445096	-0.358427	-0.505533	-0.386132	-0.408574	-0.708607	-0.31069	-0.307454	-0.375113	-0.53485	-0.444699
14296	1.16976	1.11597	1.30864	0.909752	0.860494	0.784863	1.06375	1.01788	0.948567	0.816312	1.21135	0.956297
14537	-0.864828	-1.18621	-1.05261	-1.2092	-1.09601	-0.824535	-1.62325	-1.29835	-1.25365	-1.38404	-0.972502	-1.87803
26901	0.223016	-0.0033751	0.246989	-0.0042173	0.0798827	-0.0372586	0.133992	0.0633471	-0.108391	0.268843	0.156875	0.343884
68760	4.34191	3.78199	3.85058	3.69645	3.76712	-0.0427867	4.03011	3.43287	3.5749	3.5179	3.49214	3.42897
14960	1.71368	0.959731	0.620797	2.19559	1.40918	2.02766	-0.0962309	1.43779	0.683339	0.664644	2.48172	1.82965
57890	2.39286	2.81746	2.03735	2.08256	2.06696	2.10425	2.45795	2.17886	2.18166	2.00307	2.42738	2.18074
118449	2.61766	1.83326	2.95183	2.92167	2.90792	2.91413	2.69544	2.54143	2.6121	3.03458	2.60435	2.92507
15874	-0.316519	0.060832	-0.0486763	-0.225337	-0.329689	-0.206764	-0.567289	-0.0207636	-0.286424	-0.0424617	-0.160349	-0.245542
114715	-0.298827	-0.293632	-0.253182	-0.405733	-0.360227	-0.515105	-0.562971	-0.647133	-0.561148	-0.186699	-0.35788	-0.430397
214669	-0.0985118	0.0215944	-0.0244253	-0.0029156	-0.190753	-0.0383475	0.0791075	0.0831003	-0.338963	-0.126323	-0.126676	-0.209359
677086	-0.576783	-0.100667	-0.198499	-0.0521959	-0.351398	-0.121286	0.0280762	0.135917	0.338747	0.0605652	-0.161084	0.080577
71302	0.773518	1.07459	0.248214	0.552495	0.774563	0.779781	0.828876	0.672512	0.908055	0.965572	0.46235	0.585245
16558	0.0453644	0.418965	0.260707	0.305164	0.0921843	-0.0056804	-0.0609016	-0.0921302	-0.199702	0.442284	0.0863808	0.348283
72404	0.424063	0.214216	0.609774	0.694964	0.641416	0.556919	-0.0609016	0.0263894	-0.0395522	0.670574	0.421963	0.516427
207728	1.41248	0.891957	1.39086	1.30028	1.45839	1.70462	1.25545	1.0823	1.44294	1.56298	1.52344	1.67853
414085	-0.706915	-0.442124	-0.510914	-0.483332	-0.580064	-0.357033	-0.495322	-0.318337	-0.464931	-0.653952	-0.483448	-0.172466
73699	-0.331141	-0.130006	-0.925385	-0.35294	0.0798827	-0.182083	-0.228389	0.0582495	0.145918	-0.148453	-0.376972	-0.322874
381110	-0.192967	-0.482788	-0.103057	-0.408626	-0.314493	0.0429573	-0.659538	-1.0594	-1.1049	0.0272112	-0.155943	-0.137703
276770	-0.483936	-0.294536	-0.361293	-0.281163	-0.367197	-0.398826	-0.215304	0.0983932	-0.0807879	-0.407318	-0.4225	-0.286894
74206	-0.325292	-0.215258	-0.451389	-0.175758	-0.263116	-0.244513	0.0130285	-0.273096	0.0395733	0.0983665	0.112082	-0.27463
50788	-0.907961	-0.597647	-1.01357	-0.773837	-0.933917	-0.818728	-0.404382	-0.633115	-0.702941	-1.11646	-0.824171	-0.78048
50995	-0.489785	-0.383726	-0.318131	-0.399948	-0.445904	-0.527446	-0.529997	-0.610175	-0.585835	-0.400165	-0.45974	-0.62085
53601	-0.0017901	0.122899	0.478231	0.179329	0.132707	-0.500768	0.00910296	0.131591	-0.0674044	-0.449381	0.0665543	0.119834
76279	2.63484	3.43242	2.1611	1.74215	2.83979	4.25157	-0.704027	-0.0774746	-0.564946	1.79646	2.20194	1.42242
54325	0.405298	-0.0083689	0.358813	-0.139599	-0.0930638	0.24017	0.860934	1.47475	1.52017	-0.185513	0.281709	0.0552727
258491	-0.162353	-0.381912	-0.0016441	-0.224212	0.150798	-0.0194732	-0.18848	-0.280901	-0.47316	0.208805	-0.11629	-0.664128
68031	0.181345	0.237758	0.168847	-0.0441375	0.124748	-0.0920667	-0.0255722	0.397241	0.0307112	0.240677	-0.0237666	0.0190898
67014	0.583438	0.612924	0.4303	0.273072	0.353494	0.253388	0.686831	0.942049	0.939002	0.322209	0.376925	0.470784
12514	-1.9205	-1.88322	-1.96156	-1.8268	-1.95929	-1.78422	-2.1015	-1.98207	-1.85248	-2.1786	-1.89701	-1.96316
258178	-0.663781	-0.344386	0.0350997	0.0129946	0.221713	0.458192	-0.255867	-0.470628	-0.273131	0.251795	-0.0685598	-0.316489
623205	0.205836	0.683641	0.465493	0.224745	0.421434	0.193589	0.861588	0.756623	0.643459	0.26106	0.587796	0.475703
67657	0.117741	-0.0226372	0.105189	0.0260121	0.10738	0.275982	0.440252	0.376213	0.331388	-0.125476	-0.0700284	0.120544
13555	-0.848013	-1.24257	-0.992994	-0.896057	-0.820308	-0.876803	-0.882637	-1.28943	-1.15491	-1.23431	-1.28606	-1.3218
69464	-0.902113	-0.181015	-0.142006	-0.0325664	-0.745774	0.0444091	-0.167544	-0.0373308	-0.100321	-0.244068	-0.0971981	-0.333516
13713	-0.815114	-0.779567	-0.968008	-0.788301	-0.836951	-0.676535	-0.807398	-0.975929	-0.913731	-0.589344	-0.860572	-0.838657
408069	0.0110037	-0.233094	0.465187	0.139282	0.26685	0.124884	0.0960525	0.0181057	0.604846	0.27016	0.357343	0.246971
69833	-0.26666	-0.317888	-0.265098	-0.539524	-0.194806	-0.333077	-0.208762	-0.25844	-0.317441	-0.344427	-0.344558	-0.294394
140795	1.77144	2.28382	2.27501	2.28598	2.42805	2.19245	0.911311	1.64807	1.6493	2.12555	1.8458	1.96445
17143	0.174765	0.0558382	0.081397	0.0585557	0.192768	-0.0383475	0.303515	0.26534	0.151615	0.212511	0.218558	0.0758472
17384	-0.681327	-0.0476066	-0.723294	-0.37319	-0.785574	-0.454308	-0.618975	-0.73889	-1.04666	-0.605774	-0.421766	-0.322164
210105	-0.655739	-0.878018	0.126225	-0.247354	-0.0395155	-0.670637	-0.397185	-1.2735	-1.03147	-0.149195	-0.620031	-0.305137
18314	-0.111086	-0.0928573	-0.248073	-0.0358208	-0.0687319	-0.0615774	-0.103428	-0.004961	-0.538359	-0.307812	-0.250507	-0.0362487
72413	0.482549	0.346197	0.196993	0.00142357	0.391042	0.313005	0.152383	0.218824	0.112369	0.153957	0.170827	0.0644958
72584	-0.910155	-0.833073	-0.793842	-1.0096	-1.01134	-1.17589	-1.2163	-1.30791	-1.29986	-1.03474	-1.08045	-0.856393
238871	0.165992	0.288411	0.00717439	0.624091	0.792654	1.1217	1.29993	1.55695	2.03417	0.671315	1.01602	1.03079
72925	1.98857	1.69526	1.87082	2.09434	2.06117	2.79425	2.03531	0.430375	0.543445	2.12428	1.93906	2.07938
22051	-0.504991	-0.508946	-0.687468	-0.633249	-0.502757	-0.583706	-0.760947	-0.606989	-0.280094	-0.437522	-0.539379	-0.438517
227358	-0.77856	-1.14341	-0.649806	-0.311718	-0.249367	-0.86301	-0.464572	-0.519056	-0.499113	-0.305465	-0.263888	-0.526491
56795	0.103851	-0.573391	0.0189324	0.067234	-0.0445809	-0.340336	-0.1839	-0.275644	0.162376	-0.151418	-0.0076116	0.153179
24136	1.41394	1.56899	1.19621	1.77903	1.57272	1.88393	0.688866	0.581392	0.927045	1.7253	1.53151	1.62674
75452	-0.763939	-0.527733	-0.761507	-0.892441	-0.833333	-0.939233	-0.483546	-0.25398	-0.148429	-0.903737	-0.785986	-0.537984
57913	-0.862634	-1.02355	-1.09	-0.849773	-0.962138	-0.802757	-1.01807	-1.31747	-0.739655	-0.926714	-1.28238	-1.06923
101861	0.147715	0.327648	0.0475927	0.0122714	-0.001887	-0.0593996	-0.0785663	-0.336816	-0.2035	-0.172913	0.0180894	-0.212197
58869	0.593673	0.194954	0.548779	0.893842	0.233291	0.580875	0.736627	0.787209	0.60991	0.790648	0.755342	0.758355
52504	-0.57459	-0.295874	-0.574701	-0.677508	-0.506978	-0.701852	-0.883945	-1.04411	-1.07388	-0.573532	-0.891728	-0.682574
59030	0.39482	0.477465	0.516591	0.337708	0.460365	0.289049	0.476236	0.335432	0.525657	0.81659	0.375579	0.787443
75778	-0.0942715	-0.036192	-0.398478	0.0607253	0.363544	0.127166	0.511565	0.594136	0.389625	0.400035	0.270694	0.219869
64658	0.270171	0.455349	0.280549	0.111349	0.345453	0.353367	0.215191	0.0123709	-0.0313232	0.471191	0.210807	0.302877
76014	0.32025	0.460343	-0.166257	0.172097	0.147904	0.134529	0.319216	0.227108	0.489639	-0.0009544	0.126768	-0.105776
66156	-0.343256	-0.384765	-0.304689	-0.378252	-0.278131	-0.208942	-0.418121	-0.501851	-0.495948	-0.271493	-0.253057	-0.288535
66258	-0.850937	-1.11701	-0.712271	-0.757927	-0.679201	-0.784609	-0.65823	-0.817266	-0.889044	-0.724261	-0.904211	-0.859941
545750	-0.0664905	-0.298728	-0.0009093	-2.28e-05	-0.0597771	-0.0260066	0.145187	-0.078749	0.362405	-0.287799	-0.319696	-0.227805
66306	-0.114011	-0.329404	-0.316172	0.0072091	-0.0214249	-0.117474	-0.184554	-0.0092939	-0.132604	-0.0343085	0.17817	-0.205812
117171	-0.375493	-0.110565	-0.357031	-0.544586	-0.317098	-0.297506	-0.274841	-0.475089	-0.373778	-0.181066	-0.296491	-0.278177
68066	-0.353073	-0.518459	-0.693899	-0.560496	-0.391921	-0.424545	-0.368398	-0.545181	-0.0914586	-0.883725	-0.685385	-0.686831
66513	-0.29873	-0.152657	-0.266095	-0.124773	-0.365147	-0.386693	-0.305736	-0.33038	-0.525699	-0.421639	-0.389162	-0.29784
258618	-0.320175	-0.0319115	-0.304414	-0.227828	-0.398434	-0.430353	-0.10261	-0.15139	-0.362384	-0.576867	-0.0289068	-0.129189
11907	-1.0805	-1.22902	-0.485928	-0.669698	-0.713935	-1.25356	-0.872169	-1.40604	-1.0321	-1.05939	-0.8462	-0.696763
68338	0.712108	-0.295161	-0.372757	-0.373913	-0.398434	1.98992	-0.191097	-0.334267	-0.502278	-0.483476	0.261882	-0.644263
546387	-0.964254	-1.68631	-1.01773	-1.02912	-0.873132	-1.63032	-1.10827	-1.70361	-1.62206	-0.78218	-1.38372	-1.24802
69994	0.248604	0.784767	0.57799	0.789702	0.536852	0.607009	0.82037	0.901268	0.770693	0.512401	0.605983	0.65832
100046560	1.58026	0.871823	1.98265	1.60546	1.96782	1.82353	1.7036	1.1708	1.32331	1.6929	1.38539	1.63516
68938	-0.18127	0.182112	-0.109671	-0.239399	-0.0243194	-0.225639	0.480161	0.488998	0.890331	-0.375261	-0.139788	0.0233466
71011	-0.504406	-0.568397	-0.556477	-0.468651	-0.222593	-0.400589	-0.246054	-0.0169404	-0.0920916	-0.527207	-0.64206	-0.446321
18949	-0.72839	-0.573391	-0.818534	-0.821423	-0.996149	-0.834698	-0.798239	-0.61591	-0.699776	-0.792557	-0.647201	-0.670513
19082	-0.306284	-0.26163	-0.418075	-0.352217	-0.238754	-0.283714	-0.121092	0.0397706	0.0836123	-0.243624	-0.213954	-0.165372
19158	-0.39182	-0.250929	-0.342627	-0.207579	-0.417248	-0.526176	-0.347462	-0.324709	-0.130705	-0.710284	-0.340991	-0.329968
19354	-2.45346	-2.34337	-2.52154	-2.55	-2.70825	-2.38893	-2.47638	-3.12011	-2.87035	-2.89757	-2.42204	-2.61445
212139	-0.152758	-0.176021	-0.441836	-0.197454	-0.296403	-0.415108	0.241361	0.114323	0.425073	-0.927456	-0.595799	-0.356928
20184	-0.408635	-0.117521	-0.403622	-0.303763	-0.50553	-0.206764	-0.146608	-0.163497	-0.178813	-0.429616	-0.338054	-0.342473
216850	-0.268512	-0.297015	-0.253119	0.0375831	-0.217528	-0.299079	0.727467	0.627908	0.418743	-0.196039	-0.0995479	-0.120557
27216	-0.345762	-0.330831	-0.167726	-0.519274	0.176125	-0.171466	-0.0838002	0.0206546	0.156398	-0.287799	-0.507681	-0.212906
233280	0.51033	0.713604	0.60169	0.482346	0.565436	0.379791	0.0398526	-0.19918	-0.271232	0.708375	0.292724	0.461798
27762	0.512249	0.544704	0.601047	-0.220596	0.613557	-0.232898	1.6879	1.2581	0.794747	0.331845	0.538719	0.826464
74180	0.17379	2.57418	0.192363	0.364948	-0.0858276	0.290501	0.412774	0.541249	0.351882	0.586077	3.27551	-0.198007
330662	0.041709	0.00090542	0.0821319	-0.141768	-0.18207	0.204115	0.122288	0.599234	0.447228	0.184346	-0.0502019	-0.112871
74270	0.600618	0.640907	0.695754	1.00594	0.771979	0.795752	1.61463	1.47539	1.39104	0.730081	0.742951	0.744166
74490	1.99442	1.8408	1.94557	2.16563	2.13209	2.16151	2.17335	2.07945	2.03037	2.23366	1.83993	2.16594
330577	-0.0445582	-0.175307	-0.395538	0.113518	-0.359358	-0.0528662	-0.231006	-0.472667	-0.821312	-0.0424617	-0.108947	0.0758472
98403	0.23252	0.214929	0.168113	0.243693	0.283945	-0.0760961	-0.093614	-0.136734	0.0528664	0.369646	0.0445248	0.190781
193385	-0.924045	-1.45874	-0.0178114	-0.687055	-0.394816	-0.348322	-0.866935	-0.592971	-1.53787	-0.235174	-0.38505	-0.640006
66606	-0.354535	-0.333685	-0.430078	-0.257479	-0.219698	-0.297797	-0.136794	-0.386518	-0.219958	-0.0357909	-0.246264	-0.649938
56207	-0.522537	-0.403243	-0.355855	-0.476365	-0.355499	-0.465405	-0.881983	-0.731244	-0.83777	-0.225538	-0.401415	-0.468598
76737	-0.635757	-0.740568	-0.0295983	-0.916161	-0.369489	-0.0427867	-1.24182	-0.87334	-0.923859	-0.602068	-0.580818	-0.716155
56386	0.208395	-0.276612	0.304065	0.459204	0.227502	0.347124	0.289121	-0.166683	-0.220591	0.734317	0.363952	0.615752
228880	-0.164142	-0.0770943	-0.292068	-0.123809	-0.235618	-0.219226	-0.18281	-0.201092	-0.197803	-0.222018	-0.139177	-0.27999
77125	0.185731	0.482617	0.2732	0.266112	0.356308	0.257108	-0.0072532	0.712019	0.724484	-0.0202257	0.112082	0.262437
12581	-0.850206	-0.823799	-0.729908	-0.57496	-0.733473	-0.643777	-0.675894	-1.16072	-1.03147	-0.906702	-0.786721	-0.854265
100046395	0.0753386	0.219923	0.171787	0.0912026	-0.0055051	-0.0531566	-0.0510878	-0.489744	-0.509874	0.0991077	0.114285	-0.0193633
13019	0.254453	0.166417	0.105648	-0.0072547	0.132707	0.19613	0.0149912	0.0244778	-0.0610744	0.243642	0.258211	0.0722999
258268	-0.303067	-0.181728	0.292307	0.0679572	-0.0373447	0.356561	0.0371538	0.00924863	0.135347	0.107706	-0.268294	0.102807
640502	-0.221235	-0.0069421	-0.330869	-0.429116	-0.334031	-0.514561	-0.776649	-0.986125	-0.63274	-0.340424	-0.498869	-0.456112
18141	-0.434223	-0.529873	-0.743135	-0.513489	-0.79281	-0.790416	-0.698793	-0.986125	-0.827009	-0.811087	-0.655278	-0.801764
231871	0.301973	0.79636	0.589197	0.515613	0.435183	0.423347	0.380716	0.0461426	-0.135136	0.299973	0.309613	0.346154
170823	-0.665975	-1.04852	-0.121429	-0.484561	-0.346333	-0.693141	-0.668698	-0.944069	-1.00298	-0.161054	-0.884385	-0.560545
70059	1.90157	2.52924	1.54821	1.71973	1.43523	0.112647	2.42851	3.65207	3.65466	0.25476	2.44207	1.89634
239759	3.2431	3.7827	3.2377	3.04172	3.1922	3.09551	1.46808	2.24704	2.50956	3.27664	3.27478	2.75409
17713	-0.16811	-0.35366	-0.289716	-0.42092	-0.186412	-0.298232	-0.0838002	-0.0054707	0.0610954	-0.0743333	-0.160979	-0.095844
72144	-0.39182	-0.404937	-0.375109	0.114241	-0.717915	0.271627	-0.172778	-0.419652	-0.601027	-0.346206	0.589387	-0.0717221
18045	-0.567644	-0.162942	-0.610123	-0.461419	-0.534475	-0.316381	-0.4834	-0.629292	-0.425052	-0.181066	-0.307947	-0.532876
18293	0.718687	0.314093	0.670034	0.661697	0.708713	0.428429	1.17497	0.990476	1.30242	0.592747	0.652538	0.598016
72117	-0.153489	-0.43713	0.0005605	0.0462614	0.0625157	-0.0811777	-0.712532	-1.06195	-1.12136	0.398553	-0.330711	-0.0539854
238266	3.07861	2.47002	2.55058	2.0618	2.39476	2.0371	2.10466	1.88893	1.77527	2.57546	2.85255	2.50365
21934	0.629496	0.484599	0.210001	0.69641	0.166718	0.0981283	0.172665	0.545072	0.496602	-0.0572857	0.197997	0.466764
73274	-0.351611	-0.611916	-0.119224	-0.271943	-0.0605007	-0.50585	-0.503827	-0.5318	-0.665593	-0.0861925	-0.501072	-0.369698
665962	0.179883	0.00304566	-0.156703	-0.257479	-0.42955	-0.214024	0.05948	0.769367	0.764996	0.0828013	0.156141	-0.265407
56640	-0.385241	-0.103253	-0.252237	-0.160571	-0.328242	-0.175549	-0.0628643	-0.0061079	0.126295	-0.0520973	-0.13318	-0.0703031
24061	-0.169677	-0.303632	-0.180587	-0.298701	-0.223497	-0.340699	-0.176922	-0.138646	-0.167989	-0.441557	-0.356962	-0.355115
56737	-0.83266	-0.957207	-0.541779	-0.638601	-0.556908	-0.640954	-0.64279	-0.859321	-0.480123	-0.76643	-0.792742	-0.650648
227738	-0.213437	-0.243082	-0.277958	-0.130197	-0.328242	-0.240157	0.345386	0.285731	0.106672	-0.265563	-0.431312	-0.050438
26425	-0.383778	-0.435703	-0.295779	-0.465939	-0.198713	-0.340699	-0.549625	-0.571943	-0.585202	-0.137335	-0.317676	-0.720885
75410	0.041709	-0.0162165	0.187219	0.0802514	-0.0547117	-0.0927926	0.0496663	0.162751	0.298472	-0.460499	-0.194128	-0.0376676
236930	-1.58713	-1.2283	-1.48242	-1.41965	-1.15173	-1.48949	-0.98012	-1.84953	-1.65814	-1.13499	-1.30001	-1.54387
258277	-0.391089	-0.458532	-0.0508809	-0.18299	-0.0713551	-0.291388	-0.0212105	-0.17879	-0.111794	-0.0824865	-0.498869	-0.204393
75965	-0.157144	-0.0311981	-0.215677	-0.125858	-0.0496463	-0.368648	-0.647108	-0.699384	-0.775736	-0.0628447	-0.274902	-0.317198
70719	-1.85617	-1.67062	-2.06518	-1.70097	-2.19085	-1.35519	-1.39491	-1.5698	-1.63599	-2.11708	-1.98366	-1.71982
66385	-0.18127	0.125039	-0.189773	0.0281816	0.0661338	-0.0122138	-0.319329	-0.187711	-0.200968	0.139874	-0.0362499	-0.0211725
117005	0.250797	0.4953	0.220289	0.0368599	0.37078	-0.18789	0.0810702	0.339893	0.312398	0.107261	0.19506	0.315647
11841	0.770594	0.130033	0.745726	0.677607	0.294076	-0.0760961	0.287158	-0.126539	-0.19084	0.238083	0.145126	-0.0107078
14309	-0.459079	-0.452825	-0.421994	-0.190765	-0.0170831	-0.233624	-0.0759493	-0.238049	0.0143322	0.136909	-0.149947	-0.0341203
259051	-0.417408	-0.0105092	-0.285307	0.0910993	0.0219927	-0.0811777	-0.234931	-0.0507121	-0.241481	-0.198114	-0.204408	-0.0908777
12235	-2.21659	-2.15503	-2.2004	-2.48925	-2.06784	-2.07097	-2.37105	-3.31382	-3.10139	-2.27644	-2.45949	-2.54776
81015	-0.080381	-0.108247	-0.150089	-0.158402	-0.260221	-0.139978	-0.25325	-0.521604	-0.0294242	-0.3256	-0.52971	-0.50166
70882	-1.16457	-0.329404	-0.580727	-0.443339	-0.663281	-0.229268	-0.246054	-1.39585	-1.31126	-0.931162	-0.559817	-0.410848
238831	-0.962061	-0.640452	-0.754893	-0.879423	-0.69512	-0.896403	-0.798239	-0.9052	-1.14098	-0.687307	-0.87851	-0.938692
269966	-0.0418428	-0.0949593	-0.0578098	-0.0296737	-0.046993	-0.150245	0.344078	0.160281	0.0881563	-0.136965	0.0371816	-0.0843911
218232	0.312208	-0.0675821	0.314353	0.148955	0.132707	0.0117421	-0.24082	-0.448963	-0.377576	-0.204043	-0.0692941	-0.116418
16365	-4.18831	-4.36232	-4.24556	-4.26757	-4.24812	-4.27999	-3.63048	-3.54003	-3.4141	-4.33031	-4.28427	-3.97025
16365	-4.21974	-4.0206	-4.63284	-4.16054	-4.20688	-4.28216	-3.74824	-3.82805	-3.51791	-4.41258	-4.21451	-3.8617
16545	2.68163	2.57062	3.36336	2.97302	3.18568	2.62729	3.2581	0.791669	0.455457	2.80136	2.99501	2.32983
104027	0.0409779	0.354758	0.0858063	-0.0473918	0.102749	0.0590315	0.0913201	0.154467	0.0105254	-0.0498737	0.255273	-0.0388501
224907	-0.354535	-0.323697	-0.318376	-0.445509	-0.467178	-0.420625	-0.263064	-0.244422	-0.375045	-0.542772	-0.478308	-0.493146
16998	-0.435685	-0.37863	-0.344097	-0.328352	-0.349227	-0.214024	-0.159039	-0.201729	-0.461133	-0.202561	-0.242593	-0.0752694
103406	-0.203933	-0.403599	-0.397743	-0.282067	-1.11265	-0.556665	-0.325872	-0.267361	0.0142531	-0.421215	-0.501806	-0.600985
216892	2.81103	3.41619	3.11718	3.18256	3.13807	3.37573	2.33365	2.9607	2.94759	3.87775	3.37593	3.78636
19703	-1.3605	-1.27325	-1.51696	-1.20703	-1.44118	-1.39948	-1.44136	-1.52838	-1.1011	-1.58861	-1.3705	-1.36863
232337	-0.0404154	-0.291772	0.267321	-0.0528158	0.12529	-0.0114879	-0.0687525	-0.259077	-0.284525	0.00960767	-0.182379	-0.101756
100047496	-0.285083	-0.204557	-0.223577	-0.209025	-0.345609	-0.523998	0.0764905	0.339893	0.249731	-0.33746	-0.263153	-0.40801
27528	3.78556	2.52139	3.98727	3.70416	3.64519	3.18771	2.80798	2.10176	1.94302	3.33593	3.28359	3.35714
28106	-0.534381	-0.702519	-0.613797	-0.546755	-0.632165	-0.547228	-0.339611	-0.48847	-0.302249	-0.717696	-0.668496	-0.796798
74390	-0.347956	0.0886551	-0.144945	-1.13471	-0.0930638	-0.796224	-0.887871	-0.450875	0.0307112	-0.386379	-0.748536	-0.315779
666519	-0.977414	-0.840921	-1.07897	-1.15496	-1.07647	-0.980611	-0.97096	-1.24101	-1.02387	-1.17428	-1.14139	-1.40197
98415	0.175392	0.0665393	0.161079	0.0522278	0.114134	0.05283	0.0352729	-0.378234	-0.566212	-0.037891	-0.0598704	0.0510159
56055	-0.344026	-0.331545	-0.379224	-0.28038	-0.504083	-0.483346	-0.572523	-0.296672	-0.306047	-0.551667	-0.345397	-0.686121
56448	0.402862	0.0758137	0.373878	0.394116	0.0545558	2.44653	-0.372978	0.278721	0.412413	-0.0661801	-0.0333127	0.121963
68444	0.769132	1.28576	0.459859	0.289977	0.603788	1.48529	0.0836872	0.279996	0.433302	0.584594	0.40948	0.294363
12826	0.253356	1.5647	-0.0295983	0.496954	-0.0434274	-0.129815	1.33723	0.932597	1.41193	0.112449	0.26794	1.25995
12988	-0.136674	0.0686796	-0.179484	0.140999	-0.341991	-0.235318	-0.0347316	0.0665331	0.31493	-0.312259	-0.183113	-0.5272
93960	3.10566	2.992	2.83719	3.39102	2.47725	2.1005	1.09646	1.9603	1.76388	2.37126	3.03539	2.54216
258756	0.25957	-0.0575944	-0.0310392	0.183668	0.331704	0.0248089	0.390529	0.530416	0.335819	0.139874	-0.0744343	0.195038
665700	2.49301	2.1781	2.53442	2.42143	2.5659	2.94307	2.58619	2.22863	2.38928	2.49052	2.63739	2.76568
240058	1.97175	2.47288	2.12068	1.91909	2.02644	2.08802	2.04054	2.37639	2.07373	1.99139	1.97609	1.98857
212980	0.655083	0.840592	0.57156	0.332645	0.793378	0.714447	-0.490742	0.0149197	0.215548	0.600901	0.455007	0.476697
170767	-0.225134	-0.236661	-0.217698	-0.249524	-0.233447	-0.373004	-0.221847	-0.235501	-0.259205	-0.409356	-0.319696	-0.246251
100044466	-0.768325	-0.529873	-0.871739	-0.817229	-0.258051	-0.731616	-0.213341	-0.407545	-0.165014	-0.54129	-0.949739	-0.602404
105148	-0.288738	-0.662568	-0.447225	-0.433214	-0.388303	-0.568099	-0.251288	-0.5318	-0.461766	-0.713248	-0.640592	-0.960685
17294	4.69429	4.03596	4.60016	3.06052	4.54538	3.08608	3.71411	2.99384	2.99064	2.64439	2.8361	3.20034
70335	-0.699604	-0.217399	-0.520468	-0.866406	-0.610456	-0.32969	0.518762	0.750251	0.0657796	-0.616151	-0.622968	-0.549903
17524	-0.192236	-0.525593	-0.411706	-0.553264	-0.380343	-0.506213	-0.219884	-0.477	-0.382007	-0.433075	-0.442877	-0.427717
17961	0.0804561	0.247033	-0.0920341	-0.0947609	-0.0728023	-0.0964223	-0.443637	-0.554739	-0.606091	-0.056421	0.11355	0.134024
75430	-0.896995	-0.599074	-0.769591	-0.629922	-0.779061	-0.454308	-0.972923	-1.05303	-1.14921	-0.765133	-0.773503	-0.883353
20762	0.565161	1.18588	0.737642	0.930001	0.701477	1.51806	2.86817	2.25997	3.07546	1.63932	1.3237	0.783896
258521	0.375812	-0.447831	-0.215199	-0.681269	-0.376001	-0.0303622	-0.0847816	-0.0443401	-0.582037	-0.139559	-0.71182	-0.0993913
70829	-0.594329	-0.768866	-0.466822	-0.66102	-0.542435	-0.690237	-0.251288	0.137263	-0.0768995	-0.558338	-0.672167	-0.378922
76142	0.95775	0.377587	0.767038	1.37838	1.26301	1.22623	1.16254	0.858575	0.716888	1.8098	1.2209	1.55793
21809	-0.195434	-0.561192	0.102341	-0.0162946	0.0504208	-0.127637	-5.65e-05	-0.207464	-0.148429	-0.0180021	-0.277289	0.105645
235534	-0.207223	0.175691	0.0457555	-0.125135	-0.0245606	-0.0448809	-0.834877	-0.464893	-0.53013	-0.406391	-0.0105489	-0.0270256
73067	-0.670361	-0.476367	-0.365408	-0.755758	-0.643019	-0.611836	-0.196331	-0.129088	-0.0750005	-0.644317	-0.630311	-0.469024
73067	-0.739813	-1.18265	-1.09882	-0.808623	-0.965033	-1.00312	-0.45345	-0.352746	-0.333266	-1.11201	-1.08118	-0.745007
208263	-0.141792	-0.143204	0.0409788	0.111349	-0.0105705	-0.18789	-0.238857	-0.0462517	-0.0224611	0.148027	-0.276371	-0.0156741
435391	-0.205964	-0.310856	0.118876	0.128705	-0.548948	-0.658296	-0.0775195	-0.208738	0.106461	-0.211455	-0.265356	-0.192332
329877	0.00076864	-0.802397	-0.135392	-0.204686	-0.0735259	-0.169742	-0.632714	-0.858047	-0.509241	-0.344872	-0.0832461	0.05882
373864	0.222285	-0.0640151	0.0718436	-0.101993	-0.0149123	-0.044155	-0.442328	-0.117618	-0.147796	0.015352	0.0335101	-0.39453
26371	-0.185656	-0.162644	-0.0826644	-0.0749936	-0.0793149	-0.0412512	-0.0236094	-0.132274	-0.245279	-0.18922	-0.135015	-0.0859114
101869	-0.043553	0.155716	-0.154499	-0.0904217	-0.0894457	-0.164297	0.560634	0.336848	0.227196	-0.1382	-0.0089579	-0.0873304
58998	-0.301654	-0.599074	-0.327685	-0.216619	-0.270714	-0.38353	-0.126981	-0.0825722	-0.364157	-0.274705	-0.458586	0.997446
107071	-1.15141	-1.25399	-1.13336	-0.972715	-1.06706	-1.21944	-1.02919	-0.936423	-0.642805	-1.31881	-1.31396	-1.27498
353371	0.170379	0.1921	0.0530307	-0.0477534	-0.0121987	-0.151351	0.134555	0.044231	0.125029	-0.052962	-0.236718	0.148922
64685	0.0836241	0.224203	0.071568	0.088769	0.0814506	0.0477666	-0.342882	-0.580227	-0.743453	-0.241697	0.147916	0.398655
66086	-0.351611	-0.538434	-0.457268	-0.271943	-0.480927	-0.184696	-0.070061	-0.185162	-0.198436	0.13765	-0.1486	0.0907461
66161	0.101135	0.428001	0.277609	0.309606	0.28286	0.221102	0.351929	0.263429	0.271253	0.330998	0.302514	0.721463
67849	-0.877256	-0.737476	-1.08191	-1.12097	-1.05114	-1.13741	-0.89703	-1.66347	-1.7341	-1.15389	-1.46082	-1.59495
66314	-0.354048	-0.398605	-0.310293	-0.465035	-0.222593	-0.232898	-0.0072532	0.0302126	0.0769205	-0.164019	-0.196331	-0.0887493
52064	0.0643724	-0.816665	0.069639	-0.06511	0.168165	-0.151593	0.335573	0.0754539	-0.0363872	0.0998489	-0.0516706	0.290107
11826	-0.172497	0.478892	0.176196	0.363742	0.554581	0.330946	0.591384	0.954155	0.938439	0.17831	0.358078	0.422068
52538	1.32859	1.38278	1.29982	1.28075	1.35057	1.83819	1.19133	1.10645	1.18721	1.15837	1.27671	1.211
15258	0.201815	0.382224	0.671748	0.275754	0.541556	0.307924	0.69042	1.09753	0.806853	0.478108	0.785449	0.409652
218461	-0.403517	-0.775287	-0.734317	-0.258925	0.0256108	-0.135623	-0.841419	-1.20978	-1.57965	0.0902133	-0.614891	-0.428584
68720	4.18911	4.27567	3.36777	3.7179	2.91143	0.14241	3.93459	3.70878	3.74328	0.0924369	3.69261	3.27697
68720	3.24895	3.26595	1.93108	3.31292	1.50036	-0.183534	3.34446	3.62913	3.78063	0.0998489	3.21622	2.45966
17161	-0.698873	-0.615483	-0.788698	-0.83097	-0.786297	-1.0278	-0.744591	-0.501851	-0.51747	-0.920044	-0.77901	-0.937273
15115	-1.18431	-1.43448	-1.28033	-0.920726	-0.799106	-0.91931	-0.44102	-0.101051	-0.0920916	-1.3151	-1.20455	-1.27143
68854	1.1588	-0.511324	1.22193	1.48469	1.02204	0.982317	2.09419	2.07499	1.9025	1.81869	1.81276	1.73955
83409	-0.14435	0.197807	-0.232028	-0.106332	-0.128401	-0.325999	0.339498	0.339256	0.274418	-0.218867	-0.0643008	-0.0227688
15260	0.247873	0.0601186	0.0799273	0.0722963	0.179743	0.206293	-0.354005	0.494096	0.266189	0.448954	-0.0538735	0.248957
116905	-0.914541	-0.55841	-0.646867	-1.13182	-0.600325	-0.535613	-0.698793	-0.13546	-0.58267	-0.582797	-0.789658	-0.646391
69151	-0.0414511	-0.0918382	-0.0001744	-0.317359	-0.036621	0.0110161	0.00059774	0.0748167	0.0693245	-0.104723	0.063617	0.115577
16004	0.0526752	0.261015	0.367448	0.193069	0.431806	0.194194	1.5649	1.42823	1.21633	0.453402	0.0988642	0.698169
16432	0.59338	0.55808	0.528019	0.336261	0.434976	0.286992	-0.0249179	0.186964	0.151615	0.505074	0.261358	0.473149
19053	0.345472	0.0979295	0.772182	0.273665	0.335974	0.249365	0.0712565	0.041045	0.149083	0.439319	0.241729	0.321323
19053	0.391895	-0.13393	0.692815	0.217658	0.0446964	-0.0310881	-0.400456	-0.38588	-0.412392	0.0424058	-0.242409	-0.164662
100047016	-0.258033	-0.224533	-0.355855	-0.189499	-0.373831	-0.418737	-0.0164127	-0.0022847	-0.0401853	-0.713248	-0.462887	-0.270373
71449	-0.334065	-0.583379	-0.427138	-0.299424	-0.441128	-0.637244	-0.176049	-0.1036	-0.0863946	-0.70213	-0.598736	-0.662709
75869	-0.138867	0.020881	0.642108	0.184391	0.192768	-0.109489	0.514182	1.34986	1.329	0.0309172	0.236508	0.0602389
319586	-1.47601	-0.98503	-1.15981	-0.718875	-0.240683	-0.757023	-0.913386	-0.696835	-0.702378	-0.739932	-0.592861	-1.02028
71729	0.719418	1.02679	0.454347	0.366346	0.434218	0.474308	1.08272	0.844557	0.915651	0.731537	0.643359	0.927918
71768	-0.0920783	0.298398	0.0659646	-0.0991	-0.172663	2.35361	1.08927	0.40425	0.499134	-0.768839	-0.419563	-0.680445
73673	-2.53095	-2.86273	-1.96377	-2.59049	-2.47596	-1.79801	-2.21469	-2.0203	-2.34495	-2.08299	-2.23112	-2.4527
71963	-0.149102	-0.328691	-0.11408	-0.394162	-0.218251	-0.227091	-0.185863	-0.305593	-0.192106	-0.367849	-0.237452	-0.35409
72075	-0.323099	-0.114667	-0.426403	-0.470901	-0.271076	-0.354129	-0.10539	-0.203641	-0.0876606	-0.580573	-0.586987	-0.304428
20408	-1.27277	-1.82472	-1.09367	-1.29598	-1.29356	-1.09023	-1.45837	-1.51755	-1.64802	-1.34638	-1.35875	-1.08626
27053	-0.997153	-1.15304	-0.541044	-0.992241	-0.59526	-0.0427867	-1.32033	-1.30154	-1.49483	-0.415286	-0.0363465	-1.13834
74011	0.141867	0.21921	0.195303	-0.100546	-0.643019	-0.48262	0.17659	0.418269	0.342782	-0.423439	-0.145663	-0.216453
74069	-0.193698	0.0749576	-0.229272	-0.16491	0.20507	-0.150349	-0.172778	-0.139374	-0.124691	-0.289004	-0.109682	-0.461929
20662	-1.09366	-1.01071	-0.903339	-1.1687	-0.887605	-0.892047	-0.961801	-0.819815	-0.870054	-0.704354	-0.912288	-0.973456
66573	0.473776	-0.1111	0.42385	-0.0246113	0.138496	0.106114	-0.0321147	-0.632478	-0.228187	-0.16476	0.0599454	-0.239156
214359	2.73251	3.04254	2.75919	2.58018	2.68096	2.91113	2.84134	2.47388	2.44752	2.64587	2.53814	2.65476
20740	0.0645552	-0.17828	-0.0058084	-0.0108707	-0.0091233	-0.157401	-0.344845	-0.325983	-0.186409	-0.0409793	-0.256838	-0.186048
633778	-0.26242	0.199234	-0.513119	-0.382591	0.222437	-0.0564959	0.26426	0.0843747	0.121864	0.553464	-0.133914	0.119834
100045981	0.743544	0.145728	0.335665	0.705812	0.530702	0.489407	0.0437781	0.225834	0.426972	0.626843	0.233244	0.354668
76708	-0.395476	-0.116808	-0.718884	-0.452017	-1.23495	-0.937055	-0.719075	-0.159036	-0.328202	-0.716955	-0.440124	-0.796798
209239	0.0870358	0.0579784	0.18428	0.454865	0.393936	0.129344	0.612319	0.831175	0.768161	0.34148	0.389653	0.787443
12481	-0.409366	-0.325837	-0.20888	-0.141045	-0.591642	0.232426	0.0418154	-0.197269	-0.575707	-0.354507	-0.227906	-0.115
93837	-0.704722	-0.370782	-0.704922	-0.593763	-0.0735259	-0.830343	-1.13518	-1.04029	-1.1663	-0.588727	-0.638389	-0.210068
67443	-0.0888406	-0.0885089	-0.0134022	-0.0058083	-0.0181686	-0.190189	-0.0004654	-0.081935	0.0832506	-0.115544	-0.0468451	0.032688
13143	0.65007	0.626996	1.14403	0.825138	0.181552	0.675247	1.14553	1.07905	0.985281	0.747288	0.471057	1.13863
93709	-0.36477	-0.268764	0.351097	0.197408	0.00534926	-0.150867	0.200143	0.318228	0.135157	-0.402685	-0.108213	-0.178852
432987	2.97041	3.16513	3.09983	3.03642	2.99802	3.62908	3.32287	2.86003	3.00646	3.01178	2.81963	3.33514
209003	-0.494171	-0.581952	-0.427138	-0.736232	-0.358635	-0.721453	-0.73216	-0.927502	-0.99792	-0.526466	-0.896868	-0.509464
108943	-0.409366	-0.457819	-0.38378	-0.741294	-0.650256	-0.603125	-0.592151	-0.358481	-0.551653	-0.585021	-0.646466	-0.707405
100044257	1.4695	1.07958	1.80513	1.8593	1.60601	1.60662	1.60808	1.34349	1.17835	1.5615	1.7195	1.86512
13803	-1.04854	-1.3132	-0.961027	-1.11591	-1.06365	-0.960078	-1.3614	-1.06514	-1.08148	-1.14398	-1.17003	-1.06959
17912	1.05864	0.972573	0.428994	1.25978	0.484872	0.991755	0.749712	0.672795	0.699164	0.689104	0.537691	0.355094
17912	0.709914	0.568781	0.708247	0.677607	0.628391	0.488681	0.22893	0.497919	0.294674	0.380764	0.403605	0.239734
234678	-0.734696	-0.542715	-0.737991	-0.4889	-0.602496	-0.476812	-0.580374	-0.324709	-0.27503	-0.287058	-0.378441	-0.50166
20843	-0.0259157	-0.217399	0.135043	0.0896529	0.0321234	-0.222735	-0.107353	0.199708	0.169339	0.255501	-0.0766373	0.0538537
218820	-0.209294	0.0758137	0.199712	1.04571	0.244869	0.186692	-0.107353	0.0200173	-0.252875	0.274525	-0.0728608	0.33906
55950	-0.484667	-0.205271	-0.309348	-0.229274	-0.31582	-0.297942	-0.681783	-0.589148	-0.522323	-0.408615	-0.376238	-0.469024
66276	-0.984725	-1.0207	-1.03488	-1.20341	-1.03016	-0.889143	-0.582337	-0.666886	-0.729527	-0.839994	-0.788923	-0.903928
223664	-0.530725	-0.399319	-0.44404	-0.324736	-0.551119	-0.769364	-0.34092	0.172946	0.256694	-0.646466	-0.868964	-0.344867
73284	3.3089	1.06246	3.2512	3.21288	3.24936	3.32618	3.62186	3.2997	3.1318	4.29579	3.26418	3.30889
57314	0.0541373	-0.170314	0.162234	0.078805	0.0707168	0.207745	0.270148	0.0430274	0.190228	0.0555621	0.0107463	-0.0341203
212772	-1.0264	-0.976469	-1.13776	-1.07035	-1.19876	-1.12289	-1.25229	-1.22189	-1.21694	-1.11943	-1.25668	-1.23951
58250	-0.32383	-0.789555	-0.813684	-0.727553	-0.439681	-0.555939	0.110511	-0.408182	-0.0870276	-0.242586	-0.969565	-1.19552
113845	-0.416677	-0.219539	-0.257381	-0.332691	-0.211738	-0.535613	-0.0955767	-0.237412	0.0807185	-0.333012	-0.302806	-0.307265
66208	-0.301898	-0.259347	-0.267547	-0.11718	-0.149386	-0.177848	-0.0680983	-0.11507	-0.101587	-0.123253	-0.201471	-0.115141
67978	-0.782216	-0.428569	-0.506505	-0.149723	-0.103195	-0.335255	-1.01807	-1.1021	-1.16946	-0.227021	-0.293995	-0.317907
14000	-0.416433	-0.462527	-0.35806	-0.379698	-0.455021	-0.468101	-0.496631	-0.65924	-0.883347	-0.489159	-0.423969	-0.587269
14793	-0.665975	-0.92653	-0.718884	-0.889548	-0.794257	-0.814372	-0.512987	-1.27095	-1.30556	-1.01343	-1.30735	-1.09619
75747	0.326098	0.453209	0.273935	0.450525	0.0907371	0.365998	0.251829	-0.441317	-0.428217	0.0390704	0.373498	0.209227
15483	-0.834854	0.00375907	-0.515323	-0.454187	-0.133587	-0.507463	-0.817866	-0.304956	-0.381375	-0.0661801	-0.446732	-0.393111
109910	0.0117348	0.0258749	0.299656	0.0578325	0.392489	0.328976	0.153692	0.0888352	0.0123541	0.540122	0.412417	0.602272
71159	-0.78514	0.0351492	-0.738726	-0.437071	-0.0112941	-0.515287	-0.0707153	0.119739	-0.17818	0.196946	-0.710352	-0.257603
16391	-0.165186	0.297685	0.198243	0.254621	0.286116	0.29776	-0.674586	-0.652231	-0.58267	0.265878	0.2002	0.332675
209737	-0.900651	-1.02498	-1.11498	-1.15713	-0.809996	-0.732341	-0.620283	-0.844283	-1.27011	-0.614113	-1.04593	-0.83038
19134	-1.73042	-0.734533	-1.00532	-0.954635	-1.19316	-1.16655	-1.26755	-1.22571	-1.2201	-1.17502	-1.17003	-0.993321
19206	0.277847	-0.0511737	0.12402	0.333368	0.236186	0.175803	-0.0190297	0.0550634	-0.116779	0.0109048	0.175233	-0.285981
232947	0.683514	0.811025	0.45251	0.561174	0.700593	0.770344	1.35882	1.42823	1.53283	0.550277	0.754608	0.403621
232947	0.970909	0.667946	0.83979	0.838879	0.946063	0.832775	1.58911	1.39574	1.46826	0.460073	0.824368	0.401493
100044022	-0.531456	-0.634031	-0.65789	-0.515658	-0.658215	-0.135623	-0.103428	-0.200455	-0.284525	-0.178101	-0.391659	-0.31507
239126	2.62168	2.0805	2.89377	2.53982	2.61764	2.75795	2.67058	2.34644	2.16837	2.9468	2.87972	2.93358
19879	0.307821	0.303392	0.75381	0.160526	0.17323	0.556193	0.478199	0.264066	0.124396	0.683174	1.08358	0.59234
270148	-0.0808684	-0.220252	-0.0417474	-0.0869866	-0.0472342	-0.195875	-0.387153	-0.645859	-0.695345	0.11732	-0.144194	-0.140984
76577	-0.553957	-0.153905	-0.324255	-0.552035	-0.776076	-0.330173	-0.251942	-0.827461	-0.335165	-1.26396	-0.420297	-0.595309
100042547	-0.125708	-0.491349	-0.127308	-0.26688	-0.15819	-0.492783	-0.585608	-1.19768	-1.08338	-0.0824865	-0.29326	-0.694635
26932	0.142598	0.318374	-0.0927689	0.389054	0.368609	0.41754	-0.306899	-0.494842	-0.0142321	0.364458	0.262617	0.316357
20492	-0.958406	-0.742185	-0.561253	-0.920645	-0.373107	-0.510205	-1.44464	-1.54049	-1.33489	-0.258892	-0.628843	-0.923438
74044	-0.555216	-0.402886	-0.98785	-0.668975	-0.512043	-0.776261	-0.626172	-1.00779	-1.24163	-0.73919	-0.736542	-0.464945
29876	0.450382	0.211362	0.289367	0.519229	0.532149	0.530786	-0.0164127	-0.24251	-0.0117001	0.501686	0.505675	0.630651
100045042	2.96319	2.02557	2.84086	2.79873	2.8492	3.01639	2.94275	3.01296	2.62983	2.86675	2.72939	2.9045
110876	1.71953	1.38778	1.64889	1.73419	1.71166	1.36634	2.79358	1.69713	1.73666	2.57472	2.0705	1.88428
53975	-0.41229	-0.605495	-0.494747	-0.441531	-0.621311	-0.489879	-0.475695	-0.475089	-0.649135	-0.524242	-0.607548	-0.518687
76332	0.0709521	-0.176021	0.229842	0.151124	0.208688	-0.301862	0.0876127	-0.0354192	0.00285903	-0.122511	-0.27784	0.0928745
54351	-0.089885	-0.268764	-0.20741	-0.342092	-0.172663	-0.299684	-0.136794	-0.078749	-0.0781655	-0.147712	-0.259482	-0.0710126
76559	-0.556313	-0.748891	-0.463147	-0.702965	-0.67703	-0.635792	-0.163619	0.031487	-0.0667714	-0.865195	-0.477574	-0.801055
56075	-0.422003	-0.37649	-0.244889	-0.700795	-0.299297	-0.322188	-0.471769	-0.742076	-0.882714	-0.229244	-0.62664	-0.335644
66705	0.567354	0.508141	0.400334	0.666036	0.347624	-0.260484	0.621479	2.02083	1.66188	-0.227762	1.02263	0.903796
52898	-0.604564	-0.868031	-0.876883	-0.74491	-0.76097	-0.864462	-0.399802	-0.42921	-0.0458823	-0.786627	-0.636291	-0.691087
100044333	-0.668899	-0.564117	-0.668913	-0.833139	-0.765312	-0.579895	-1.03246	-1.378	-1.38089	-0.654694	-0.739724	-0.747135
100044333	-0.499289	-0.537542	-0.399948	-0.551818	-0.0434274	-0.693867	-0.783845	-0.909023	-1.00931	-0.428998	-0.693462	-0.587505
67148	0.680671	0.444648	0.66342	0.679054	0.165753	0.312521	-0.0563218	-0.16286	-0.356687	0.115414	0.272897	0.213484
84543	0.203277	0.249173	-0.458003	-0.119349	-0.359358	-0.0942445	0.0141916	-0.0838466	0.140221	-0.677671	-0.237452	-0.215035
258709	0.139673	-0.127598	-0.0653335	-0.222284	0.450379	0.398665	-0.114468	-0.0361272	-0.0775325	-0.066839	0.143657	-0.0844137
94315	0.353879	0.653915	0.427083	0.424089	0.719658	0.431333	1.0644	1.14022	1.04352	0.542875	0.614354	0.870451
69301	0.986262	0.110771	0.598751	0.924216	0.406962	0.638224	0.709148	0.683982	0.93059	0.0535979	0.686317	0.59234
13437	-0.313595	-0.394529	-0.237246	-0.208543	-0.200884	-0.280084	-0.124218	-0.228491	-0.199069	-0.23258	-0.382847	-0.163953
234852	0.20357	0.556368	0.0431834	0.321074	0.183361	0.195404	0.469693	0.722214	0.580792	0.0361056	0.375806	0.447017
234852	0.254891	0.22135	0.356094	0.246706	0.265855	0.19008	0.578953	0.777651	0.884001	0.306644	0.246462	0.219869
258414	-0.0024298	0.126545	0.204122	-0.25097	0.14718	0.111921	0.125232	0.207227	0.242768	-0.171431	0.112816	-0.0163836
52009	0.0934937	0.806348	-0.186686	-0.131127	-0.2663	-0.166959	0.834764	0.405525	0.287711	-0.139855	-0.178707	0.00596466
634594	-2.32845	-2.20782	-2.31577	-2.25421	-2.17349	-2.51306	-2.16365	-2.20764	-1.91476	-2.4232	-2.47344	-2.20722
70257	-0.31301	-0.263974	-0.168167	-0.23735	-0.186954	0.122084	-0.165581	-0.113795	-0.2549	-0.122141	-0.179442	-0.150709
218442	0.627059	1.79728	0.569356	0.497822	0.881298	0.644757	0.519977	1.13066	0.971566	-0.0467352	0.658413	0.579427
233902	-0.0394407	-0.0076555	0.250419	0.0874833	0.174678	-0.130541	0.283233	0.44758	0.397854	-0.241103	-0.136117	-0.102229
18193	0.219361	0.609446	0.257033	0.167034	0.401987	0.977962	0.523342	0.434199	0.353543	0.2219	0.308144	0.362029
72690	3.17072	3.67988	3.22796	3.29508	3.18243	2.98779	3.44325	3.14995	3.0742	3.37003	3.26646	3.28175
21452	0.581245	0.544525	0.716331	0.685563	0.64214	0.517719	0.272765	0.738781	0.756767	0.439319	0.659147	0.800214
105841	-0.894729	-0.98289	-1.20611	-0.888825	-0.992531	-0.749038	-1.06321	-0.930688	-0.961839	-0.794781	-0.986454	-0.530038
433406	-0.394745	-0.150338	0.143127	-0.120434	-0.0434274	-0.360663	-0.0275349	-0.157125	-0.204133	-0.0467352	-0.4225	0.453994
22287	-0.19516	-0.100399	-0.11408	0.327583	-0.140099	0.247671	1.40527	0.636829	0.94287	0.351116	0.938921	0.4994
382793	-0.426599	-0.0740029	-0.206675	-0.280621	-0.558355	-0.339611	-0.516258	-0.418378	-0.433281	-0.0832277	-0.234515	-0.241994
328365	0.114086	-0.221679	0.0240766	-0.261095	-0.270352	-0.343966	-0.15933	-0.0949339	0.0579304	-0.44271	0.163484	-0.100101
67003	0.0493853	-0.22066	0.0899006	0.089033	0.111433	0.0825207	-0.0896885	-0.207818	-0.185143	0.184593	0.141944	0.116878
23936	1.06712	0.419678	1.00955	1.15411	1.0054	1.13041	1.60481	1.21859	1.35052	1.3384	1.36482	1.44086
57274	0.013197	-0.245935	0.403273	0.400625	0.139944	0.227345	0.626059	0.541249	0.501666	0.36211	0.361749	0.611495
242747	-0.559237	-0.451398	-0.283837	-0.176482	-0.216804	-0.264839	0.15958	0.0404078	0.107305	-0.212197	-0.219829	-0.469734
100048280	1.72831	1.62035	1.83555	1.43624	1.70008	1.4153	1.04739	0.92357	0.736511	1.64525	1.52858	1.66364
100044885	0.606832	0.364032	0.273935	0.450073	0.702201	2.72384	0.294573	0.141723	0.03625	0.485088	0.240312	0.377067
66237	-0.247798	0.113625	-0.0200161	-0.0541175	0.0494904	-0.100052	0.111166	0.199071	-0.0933576	0.214735	-0.177238	0.126219
11655	-0.0862296	0.545239	0.5429	0.386161	0.207964	1.06108	1.54593	1.73537	1.99302	0.874404	0.496549	0.802342
100048669	-0.157144	-0.0320899	-0.186098	-0.162018	-0.0510935	-0.100052	-0.285309	-0.204278	-0.2687	-0.222574	-0.251221	-0.0993913
11807	2.07703	3.38248	2.59541	1.84556	3.08221	4.40165	0.0980807	-0.454061	-0.116146	2.67478	2.11089	1.59482
12010	-2.43445	-2.44824	-2.57298	-1.41675	-2.15902	-1.26155	-2.91735	-3.15643	-3.06658	-1.77539	-2.06443	-2.10222
12010	-2.70159	-2.7921	-2.64603	-2.37093	-2.52356	-2.23009	-2.79304	-2.96081	-2.9058	-2.42268	-2.24874	-2.26043
12075	1.48559	1.54544	1.42549	1.71105	1.46418	1.63421	1.76641	1.44098	1.62398	1.88911	1.84727	1.60901
14681	-0.247432	-0.659001	-0.0420624	-0.0860826	0.0415305	-0.341062	0.0176082	-0.235501	0.0300782	-0.155124	-0.198681	-0.0298635
140740	0.156488	-0.0311981	0.0417136	-0.217703	-0.0597771	-0.16103	0.339498	0.569285	0.392157	-0.271493	-0.343194	-0.393111
226641	-0.704722	-0.305148	-0.330134	-0.682715	-0.402776	-0.387522	-0.259793	-0.193445	-0.318074	-0.139065	-0.457747	-0.203683
100046469	-1.44238	-1.51795	-1.28121	-1.10152	-1.41658	-1.30002	-1.31117	-1.16199	-1.15491	-1.47076	-1.15902	-1.30052
15953	-0.983262	-0.847342	-0.840139	-0.227828	-1.02003	0.368176	-1.81559	-2.16622	-1.77462	-0.693236	-0.797735	-1.14728
218103	-0.233907	0.125753	0.109322	0.0708499	0.223812	1.25309	0.287813	-0.0405168	-0.167419	-0.0676625	0.0371816	0.281593
245472	0.113355	-0.243082	0.426789	-0.0303968	0.0952856	-0.277906	-0.202219	-0.230403	-0.200335	-0.0685273	-0.253148	0.134733
19070	0.626571	0.534538	0.659011	0.297209	0.484389	0.655405	-0.0255722	-0.104874	-0.290222	0.443766	0.31769	0.315647
19227	2.85636	2.67477	2.71446	2.77631	2.68204	2.96775	3.42013	4.23702	4.39021	2.41684	2.72257	2.44405
19227	2.08946	2.17467	2.32865	2.26501	2.00762	2.49444	4.1433	3.9318	4.10789	2.28046	2.43619	2.32202
73642	-0.381585	-0.0904113	-0.210349	0.0607253	0.246317	-0.206764	0.166777	0.182504	0.265556	0.112449	0.167156	0.141118
100038965	2.7043	2.61271	2.71091	2.62561	2.51163	2.75723	2.80143	2.50001	2.60767	2.62901	2.63911	2.57261
26570	-0.0031304	-0.174492	-0.0662084	0.201989	0.0662544	0.260556	3.27576	3.6081	3.73695	-0.291209	0.133102	-0.950043
20608	0.236176	0.246319	0.137248	-0.252417	-0.0033342	-0.010036	0.224351	0.557816	0.170605	-0.0268965	0.0665543	0.307134
74102	0.175496	0.180685	-0.197856	0.195962	0.0335707	0.0240829	-0.270915	-0.457884	-0.436446	0.0991077	0.23251	0.0864893
74392	0.612681	0.301252	0.136513	0.590824	0.42071	0.480696	0.363051	0.21755	0.235805	0.115414	0.222964	0.373824
211187	0.210588	0.46177	0.213675	-0.0296737	0.118235	0.36745	0.158271	0.355186	0.256694	0.170263	0.222964	0.4994
76608	-0.118397	-0.285173	-0.224312	0.139553	0.00100751	-0.0746442	0.354546	0.272349	0.402918	0.00868117	0.0599454	0.126929
66601	4.28781	2.62626	2.56161	1.73998	2.35134	2.18955	3.32549	3.72471	3.63377	2.44871	1.73198	1.53877
56378	-0.177614	-0.0966894	-0.136127	-0.216438	-0.143175	-0.416197	0.173465	0.385771	0.332021	-0.219115	-0.0984832	-0.0121268
622271	-0.222106	0.0223078	-0.140536	-0.117903	-0.214814	-0.359816	-0.57972	-0.621008	-0.601027	0.0294348	-0.332669	-0.233481
12301	-0.446505	-0.877305	-0.551752	-0.653426	-0.357332	-0.47536	-0.690942	-0.9052	-0.896007	-0.290171	-0.57465	-0.555697
52335	0.1084	0.0607528	0.283488	0.115929	0.080335	0.0680746	-0.180629	-0.0467296	-0.006636	0.0724244	-0.0155422	0.0950029
12846	-0.521059	-0.355533	-0.581646	-0.515658	-0.594743	-0.50222	-0.831605	-0.803885	-0.526965	-0.546108	-0.489047	-0.613046
330788	0.0336671	0.0522711	0.0909504	0.0498774	0.0147564	-0.224913	-0.416812	-0.525428	-0.654832	-0.0898985	0.0548052	0.00277205
100048649	-0.342838	-0.0155031	-0.243419	-0.138152	-0.0040579	0.225893	-0.133523	0.195248	-0.194638	-0.109911	-0.0002685	-0.0319919
258722	0.0629103	-0.307289	-0.044267	-0.417304	-0.122009	0.169996	0.62933	0.473068	0.465585	0.139874	0.249399	0.270951
244885	-0.424719	-0.304435	0.0806621	-0.0153906	-0.0633952	-0.272099	0.175544	-0.0456145	0.207319	-0.212938	0.593059	-0.0277351
13605	-1.13752	-1.19263	-1.2987	-1.5641	-1.43032	-1.42924	-1.61081	-2.89518	-2.64753	-1.61603	-1.75088	-1.96813
13807	-2.4403	-2.36691	-2.60531	-2.14212	-2.43906	-2.1951	-1.8856	-1.73739	-1.76259	-2.39133	-2.22671	-2.21534
243382	0.52422	0.632275	0.245275	0.422321	0.511164	1.82803	0.487358	0.362559	0.476346	0.46452	0.323565	0.548826
16970	-0.138867	1.59966	-0.39462	-0.126822	-0.0565207	-0.113845	-1.78092	-0.882261	-0.861192	0.313315	-0.0797581	0.815113
14130	-1.98849	-1.82757	-1.47066	-1.14917	-1.50775	-0.804209	-1.84438	-2.37905	-2.33862	-1.03419	-1.33746	-1.35728
14130	-2.03236	-1.90176	-1.345	-1.00815	-1.35073	-0.926166	-1.86335	-2.1127	-2.09555	-0.834064	-1.08192	-1.22177
69982	1.2977	1.39777	1.13962	1.02402	1.29702	1.21658	0.259026	0.925481	0.689669	0.870698	0.831711	1.13012
18514	0.334384	0.210411	0.221942	0.242005	0.361952	0.282371	0.626059	0.705647	0.622922	0.113339	0.108851	0.15584
234353	-0.255109	-0.552702	0.207061	0.197408	-0.0843803	0.199033	-0.393914	-0.0298756	-0.505443	0.32295	0.00560607	-0.413685
72630	1.95713	2.20036	1.89475	2.27875	1.81251	1.87046	1.3719	1.39701	1.19734	1.98241	1.96476	1.69272
21687	2.73061	2.14471	2.76958	2.78354	2.71677	2.72892	2.93752	2.493	2.48234	3.0224	2.53753	2.77821
72958	0.105313	0.154717	-0.159643	0.116308	-0.0080378	-0.784609	0.176999	0.391931	0.35924	0.177675	-0.24553	0.175882
21981	1.46073	1.74662	1.53204	1.20698	1.40629	1.09048	0.785695	1.43779	1.26026	1.01323	1.15114	1.22802
320295	0.93728	0.644403	1.00514	0.470052	0.555305	0.97288	0.880561	1.05547	1.24355	0.924064	0.94039	0.732105
22333	0.299048	0.211362	0.0595344	0.181188	-0.0268521	0.090748	1.73239	1.56778	1.25722	0.0850249	0.10483	0.125611
22417	2.06826	2.26171	1.98326	1.78554	1.92513	1.79435	2.18971	2.03931	2.01645	1.72444	1.83931	1.82043
75064	0.636075	0.637269	0.461329	0.0947152	0.719568	0.393584	0.490629	-0.0226752	0.171871	-0.0320849	0.152469	0.370276
14455	-1.24864	-1.0792	-1.39277	-1.33214	-1.49256	-1.51635	-1.07237	-0.80261	-0.728894	-1.46483	-1.28312	-1.43461
18189	0.071537	0.0230212	-0.210349	-0.287732	-0.135195	0.0446511	0.0459278	0.0206546	-0.477591	-0.200152	0.166421	0.177301
100041269	-0.331872	-0.454965	-0.518998	-0.302317	-0.362253	-0.542872	-1.00891	-0.885447	-0.989691	-0.358213	-0.857068	-0.406591
103268	-1.17188	-1.04852	-1.18847	-1.17015	-1.13291	-1.19041	-1.27584	-1.70489	-1.78474	-1.08607	-1.26274	-1.41545
59054	-0.233176	-0.477794	-0.306618	-0.347155	-0.304362	-0.325818	-0.259139	-0.411368	-0.426951	-0.231468	-0.327039	-0.342739
11534	-1.2618	-0.947754	-0.5438	-0.971449	-0.598878	-0.772268	-1.21376	-1.81321	-1.89425	-0.436039	-1.30221	-0.790413
66120	-0.814871	-0.710367	-0.890111	-1.00526	-0.815242	-0.293877	-0.95395	-1.1913	-1.23403	-0.717696	-0.995266	-1.20049
66190	-0.349692	-0.579241	-0.12492	-0.514212	-0.147517	-0.510568	-0.860392	-0.963823	-1.01438	-0.205844	-0.485835	0.15176
11488	0.234714	0.247033	0.747931	0.741248	0.507546	0.451659	0.578953	0.0327614	-0.173749	0.600901	0.520361	0.534873
66360	-0.382316	-0.865177	-0.428608	-0.343539	-0.467178	-0.420189	-0.746553	-1.07661	-1.06312	0.0123872	-0.467293	-0.468315
97484	0.291738	0.301252	0.107118	0.129428	0.430841	0.260012	0.404923	0.333521	0.27695	-0.126959	0.17303	0.250376
66403	-0.109624	-0.355087	-0.283102	-0.0514899	-0.202572	-0.0501439	-0.230352	-0.457743	-0.437079	-0.310776	-0.137585	-0.204629
117600	1.10835	1.03892	1.35053	1.52085	1.31439	1.49555	1.8024	1.54102	1.51954	1.58966	1.66883	1.32167
271564	-0.973758	-0.733909	-0.830586	-0.924984	-0.948389	-0.996582	-0.637294	-0.758644	-0.716867	-0.98601	-0.898336	-0.699601
258684	-0.837047	0.0722466	0.0799273	-0.112117	-0.341991	-0.143608	-0.0046362	0.250047	-0.0135991	0.256983	-0.225703	0.170916
14610	-0.699604	-0.357762	-0.374962	-0.676207	-0.302915	-0.373418	-0.744591	0.0926584	-0.428217	-0.0113313	-0.40003	-0.349833
68925	-0.255109	-0.855189	-0.619676	-0.485357	-0.428826	-0.465342	-0.291066	-0.381101	-0.109183	-0.161795	-0.9211	-0.740041
78833	-0.820963	-1.00429	-1.03562	-1.20341	-1.0989	-1.00602	-0.981167	-1.31428	-1.30936	-1.00973	-1.14213	-1.22603
14767	0.0153902	-0.108484	0.0520019	0.122197	0.0451487	0.180885	0.0800889	0.16357	0.356075	-0.278905	-0.161818	-0.0312824
79555	-0.0811121	0.157143	0.24454	0.288531	0.0952236	-0.0759146	-0.067444	-0.188348	-0.246545	0.207323	0.089318	0.220579
71233	0.927776	0.425386	1.39168	1.73925	1.74567	1.49555	1.12067	1.10581	0.758736	2.16558	1.64827	2.12834
237859	-0.236393	-0.200633	-0.307878	-0.129619	-0.213427	-0.174533	-0.215108	-0.13546	-0.238316	-0.218867	-0.269762	-0.0805904
16511	0.65289	0.545239	0.263647	0.464989	0.377293	0.270175	0.627367	0.601783	0.870075	-0.0372733	0.305207	0.148922
78787	0.360002	0.599458	0.471617	0.193069	0.54445	-0.14506	0.22137	0.67761	0.271253	0.511957	0.855209	0.316357
93698	-0.427643	-0.487782	-0.556477	-0.42092	-0.310152	-0.384618	-0.652996	-0.661279	-0.735667	-0.271493	-0.478216	-0.281015
241624	-1.50379	-1.12914	-1.62646	-1.78124	-1.27185	-1.014	-1.37332	-1.60867	-1.59548	-1.27211	-1.60989	-1.37218
71907	2.09604	2.73674	1.04923	2.3706	0.951128	0.30865	2.36243	4.09301	4.23069	0.503803	2.50448	0.922952
231296	0.735502	-0.834946	-1.20905	-0.918372	-1.46868	-0.683704	-1.38379	-1.18875	-1.1682	-1.33882	0.507878	-0.985517
20345	-1.36562	-1.15696	-1.37586	-1.05733	-1.21468	-0.0238288	-0.914695	-1.47677	-1.2967	-1.22171	-1.01656	-0.610918
20345	-0.983262	-0.480648	-0.794577	-0.324012	-0.657492	-0.198053	-0.878057	-0.872703	-0.837137	-0.831841	-0.680245	-0.405172
27279	-1.39193	-1.37741	-1.55444	-1.45942	-1.37316	-1.05901	-1.32556	-1.38756	-1.23087	-1.37811	-1.0922	-1.39743
29861	-0.0277434	-0.181728	-0.156703	-0.0267809	-0.0416864	-0.0419772	-0.128943	0.0187429	-0.0990546	-0.330789	-0.247733	-0.0703031
68837	-1.15068	-0.11324	-0.390394	-0.786855	-1.72701	-0.41656	-0.255213	-0.179427	-0.177547	-0.840735	-0.368161	-0.432841
100045551	0.0870358	0.245606	0.133573	0.00648591	0.092908	-0.0652071	0.239398	0.690991	0.619405	0.0702008	0.093724	0.157436
76509	3.15376	4.01782	3.4791	3.59978	3.77968	3.92831	2.31664	2.48726	2.44626	3.888	3.7606	5.33513
258758	0.138942	-0.0090823	-0.521202	-0.162018	0.446761	0.490133	0.326413	0.717258	0.52034	-0.317447	0.142923	-0.129898
76927	-0.11328	-0.242368	-0.100118	-0.112117	0.0856717	0.0770762	0.0908839	0.208629	0.106672	0.227335	0.0320414	0.304296
66878	0.107506	-0.151765	0.30039	0.30661	0.172507	0.128618	0.508948	0.799953	0.651688	0.11319	0.0305728	0.401493
380686	0.399937	0.139307	0.202652	0.119304	-0.24792	-0.0172954	-0.0425826	0.462873	0.268088	0.0516708	0.241321	0.123382
258902	0.11043	0.103637	-0.0111975	0.125089	0.212306	0.244041	0.469039	-0.52033	-0.427584	0.416342	0.241321	0.460379
13057	-0.780754	-1.12985	-0.818828	-1.02912	-0.922339	-0.939233	-1.42239	-1.62205	-1.28974	-1.19058	-0.974705	-1.26434
93712	0.488398	0.426812	0.489254	0.856959	0.565436	0.313731	0.167431	0.652759	0.450393	0.153215	0.438118	0.348283
69543	3.63112	4.08488	3.80698	3.6935	3.70651	4.06827	4.00263	3.44307	3.44347	3.52583	3.56685	3.70846
13684	-0.329679	-0.504904	-0.476375	-0.556157	-0.570657	-0.651254	-0.967689	-1.17601	-1.22517	-0.604199	-0.723276	-0.602404
69740	-0.80561	-0.579812	-0.922446	-0.807104	-0.821031	-0.935603	-0.715804	-0.800062	-0.9726	-0.964516	-0.894665	-0.886901
70086	-1.02493	-0.947041	-1.43906	-1.38855	-0.892127	-0.775172	-1.09592	-1.10018	-0.78713	-1.17057	-1.44907	-0.757068
380855	-0.877987	-0.627611	-0.795312	-0.909074	-0.810177	-0.970448	-1.35631	-1.6622	-1.70372	-0.91189	-0.799204	-0.903431
545428	0.652159	0.292691	1.00955	1.16938	1.04086	1.14783	0.674473	0.80505	1.01123	1.04266	1.09386	0.949912
100034684	6.42548	7.06868	6.40722	6.35032	6.61929	6.40288	4.89764	4.67414	4.86813	6.43267	6.55056	6.61643
75677	0.553464	0.392569	0.376293	0.59661	-0.0098469	0.306472	0.385868	0.5113	0.801077	0.371375	0.808213	1.11947
106628	-0.0666733	-0.609775	-0.288246	-0.256032	-0.12418	0.0389646	-0.271569	-0.122079	0.0560314	-0.277669	-0.081288	-0.124223
106628	-0.430567	-0.68183	-0.230926	-0.215534	-0.306533	-0.517465	-0.184554	-0.466168	-0.004737	-0.653952	-0.600939	-0.355509
114664	0.427718	-0.853762	-0.344097	-0.369574	-0.126351	0.392132	0.248558	0.263429	-0.178813	-0.246292	0.283912	-0.246961
11650	-0.354535	0.0173139	-0.0721924	0.00286995	0.0567267	0.0531203	0.523996	0.862398	0.856782	0.167298	-0.114087	-0.0220593
100040823	-0.440656	-0.608348	-0.563825	-0.618351	-0.377268	-0.623451	-0.350733	-0.466168	-0.443409	-0.351098	-0.453708	-0.534029
78329	0.337796	-0.0146877	0.27089	0.138267	0.125471	0.312037	0.104696	0.443119	0.0828075	0.0205404	0.601136	0.13828
12325	-0.0738013	-0.217399	-0.149355	0.00648591	0.0285053	-0.219831	-0.0181574	-0.185162	-0.19084	0.0931781	0.0201088	-0.0525664
15926	0.801299	0.815622	0.972068	0.495363	0.773116	0.551838	1.33919	1.03635	1.08783	0.483791	0.52183	0.373824
105727	-0.436051	-0.932951	-0.773339	-0.642488	-0.739503	-0.547863	-0.865626	-0.580227	-0.581404	-1.11424	-0.790667	-0.77173
630218	-0.081321	-0.0468139	-0.0042687	0.00276664	-0.0547117	-0.0251769	0.366977	0.143157	0.0779491	-0.102993	-0.0729657	-0.034475
74022	0.359728	0.285557	0.293042	0.154017	0.335323	0.151744	0.303515	0.269163	0.292775	0.256983	0.154672	0.194328
19155	-0.0074821	-0.0326249	-0.02642	0.174829	0.152366	0.200082	0.0385441	0.193336	0.44976	0.180428	0.18331	-0.0210458
100042757	-0.635269	-0.335825	-0.846753	-0.958251	-0.612627	-0.443419	0.130793	0.206718	0.241502	-0.447899	-0.235984	-0.62156
100042757	-0.238294	-0.434989	-0.474905	-0.713089	-0.485993	-0.282262	0.214537	0.215001	0.2453	-0.708801	-0.212486	-0.480376
19348	-0.899919	-0.959347	-1.02423	-1.25187	-1.10397	-1.17444	-1.04685	-1.94002	-1.90628	-1.11409	-1.42543	-1.47576
19348	0.103851	0.283417	-0.225782	-0.412242	-0.221146	-0.411962	-1.04162	-2.02094	-1.95502	-0.332271	-0.697746	-0.521761
20174	-0.90416	-1.48513	-1.29576	-1.11374	-0.955522	-1.20901	-1.05209	-1.39585	-1.01837	-1.08963	-1.11924	-1.49704
72043	-0.260372	-0.665065	-0.324664	-0.286407	-0.256086	-0.314112	-0.868243	-1.1639	-1.08781	-0.379893	-0.158881	-0.501502
229541	0.318057	0.105064	0.355506	0.341323	0.376569	0.579423	0.919162	0.530416	0.538381	0.406706	0.512284	0.36531
26568	0.948246	1.06175	1.07642	0.985687	1.01843	0.621528	0.226313	-0.0041963	-0.195904	0.695774	0.682645	0.727139
26950	2.54346	3.01079	2.70858	2.43279	2.69072	2.43346	2.76545	1.36005	2.27598	2.5762	2.62418	2.42064
74351	-0.858248	-1.60427	-1.75433	-1.40952	-1.39559	-1.60855	-1.78681	-0.738253	-0.528231	-1.46705	-1.12157	-1.12173
50523	0.189387	0.182112	0.502482	0.32686	0.221713	-0.267017	-0.294468	0.151918	-0.164887	0.486756	0.323565	0.385885
50880	-0.682497	-0.639025	-0.714557	-1.06311	-0.749392	-0.700128	-0.611124	-0.759918	-0.73649	-0.668035	-0.685385	-0.640006
52840	0.239727	0.393282	0.17739	0.156548	0.240011	0.314457	0.365014	0.376213	0.517491	0.165075	0.299752	0.362945
17974	-0.196622	0.213502	0.198977	-0.436107	-0.22404	-0.494235	-0.166236	0.22201	-0.0230941	-0.212197	0.2751	-0.0880398
54378	0.687251	-0.238801	0.845669	1.22289	0.950404	0.889398	1.06113	0.70947	1.05491	0.26736	0.68852	0.65903
76425	0.625109	1.00539	0.797168	0.875762	0.996717	0.602653	0.794855	0.982192	1.13847	0.671562	0.794261	0.786024
12401	-0.899919	-0.0583078	-1.22154	-0.685608	-0.420866	1.25962	-0.312133	-1.00269	-0.771938	-1.05198	-0.24553	-1.05434
66965	0.0336671	0.19424	-0.288981	-0.0123171	-0.0995765	-0.0942445	0.35062	0.46797	0.319994	-0.44864	-0.175036	-0.280306
12418	-0.501482	-0.480648	-0.843814	-0.69067	-0.506978	-0.857202	-0.550933	-0.357206	-0.0230941	-0.575014	-0.364489	-0.789704
67177	-1.52207	-1.50047	-1.59069	-1.39795	-1.53941	-1.38596	-1.74886	-2.09294	-2.07972	-1.38955	-1.51149	-1.62333
100039354	-1.28812	-1.08134	-1.07457	-1.14122	-0.980229	-1.27099	-0.502519	-0.710853	-0.70484	-1.07125	-1.02684	-1.11748
67289	0.329754	0.168557	0.465003	-0.198177	-0.177728	0.0204533	0.204723	0.523407	0.677641	0.445248	0.272897	0.333384
83602	-0.899188	-0.556983	-0.558681	-0.467204	-0.293589	-0.340336	0.268185	1.01724	0.777023	-0.367108	-0.868964	-0.717338
13009	3.26924	3.6443	3.41296	3.42016	3.04602	1.92894	3.42493	3.07986	3.2776	3.08363	3.14517	3.62425
244329	-0.646966	-0.37863	-0.873209	-0.731892	-0.981676	-0.539243	-0.216613	-0.691737	-0.302882	-1.03345	-0.780846	-0.5946
67684	-0.0806247	0.0835185	-0.0949736	0.164142	0.0948376	-0.134534	0.00706752	-0.0972278	0.0690871	-0.197373	-0.0068773	-0.0844925
105651	0.486204	0.177118	1.11904	0.827308	1.21887	1.12823	1.11805	0.646387	0.448494	1.34062	0.932312	1.03505
54630	1.59086	2.10904	1.72605	1.49481	1.62699	1.36489	1.8338	1.76977	1.73286	1.42882	1.56236	1.48627
69890	0.784972	0.21921	0.759689	0.289543	-0.0434274	0.607735	1.70099	1.73345	1.9101	0.305162	0.840401	0.338882
258570	0.151371	-0.584806	0.0497973	-0.0152098	0.204346	-0.379537	0.247249	0.0690819	0.120756	0.0679772	-0.104541	-0.588215
239833	-0.215631	-0.400746	-0.614532	-0.445509	-0.419419	-0.0986001	-0.172778	-0.276919	0.0484353	-0.350801	-0.215423	-0.349833
17311	0.270536	-0.20099	-0.250768	-0.0137634	-0.0894457	-0.245239	-0.346154	-0.359118	-0.439611	-0.330048	-0.0083459	-0.073141
13885	-0.791093	-1.28752	-1.21052	-1.21281	-1.1264	-1.20928	0.787004	0.755348	0.677641	-1.12313	-0.917337	-1.2239
72273	0.186358	0.10221	0.282019	0.317458	0.245593	0.108291	0.267531	0.025115	-0.000306	-0.129182	1.1482	0.183686
17975	-0.485124	-0.788525	-0.32436	-0.43891	-0.298031	-0.355763	-0.0203382	-0.180064	-0.120577	-0.471405	-0.58919	-0.788994
18027	1.27613	2.14899	1.8598	1.01787	0.928696	-0.0427867	1.47135	1.24982	1.17431	1.48664	1.04305	0.910181
114643	-0.564355	-0.940799	-0.585872	-0.522167	-0.689331	-0.415592	0.489321	-0.276282	0.0237482	-0.699166	-0.645732	-0.319326
18549	0.518372	0.16071	0.498807	0.880101	0.640693	0.607735	1.01766	0.842079	0.426339	0.826226	0.825837	0.697341
20911	-0.220894	0.173551	-0.450654	-0.364511	-0.234171	-0.419463	-0.132869	-0.0704653	0.211117	-0.741414	-0.275637	-0.64781
226105	0.367039	1.46411	0.48558	0.344939	0.6501	0.696208	0.0457408	0.326512	0.218713	0.485181	0.806744	0.122672
217082	1.45196	1.81797	1.74516	1.78626	1.60239	1.83021	1.04609	1.05866	0.944769	1.29392	1.54473	1.3951
223752	-0.918928	-0.739616	-1.1407	-0.772391	-0.949837	-0.91984	-1.13321	-0.840843	-0.784598	-0.728814	-0.920856	-0.945077
73431	0.456376	0.503555	0.415451	0.359403	0.368609	0.455869	0.600543	0.243038	0.244034	0.478751	0.468225	0.520595
56612	-0.881186	-0.934378	-0.995117	-0.893164	-0.917997	-0.831172	-0.91077	-0.833833	-0.692179	-0.871865	-0.898924	-0.588215
632823	-0.0337382	-0.215377	-0.080276	-0.143938	-0.0858276	-0.0165694	0.144532	0.0455054	0.150982	0.146545	-0.070518	0.0950029
65086	1.0835	1.65959	1.56217	1.61414	1.53003	1.59428	0.547549	0.588402	0.861846	1.43253	1.3472	1.86371
110956	-0.621704	-0.233807	-0.438896	-0.751579	-0.466455	-0.145786	-0.488125	-1.10082	-0.951078	-0.590209	-0.566426	-0.7145
65112	0.946784	0.722165	0.739847	0.678331	0.843308	0.582327	0.552783	0.134076	0.595351	0.652044	0.5557	0.651226
67860	2.08873	2.40162	2.52854	2.35562	2.52009	2.17636	1.87387	1.88638	2.11428	2.39101	2.27455	2.2048
67914	0.184086	-0.411447	0.51277	0.310949	0.291905	0.421895	0.758217	0.309307	0.283913	0.488979	0.471162	0.546934
68018	0.0183145	0.0408565	-0.108936	0.0845906	0.0835008	0.0531203	-0.0759493	0.159565	0.12946	0.470449	0.0768347	0.259599
667618	-0.557775	-0.180403	-0.325725	-0.252236	-0.234774	-0.351226	-0.641219	-0.241873	-0.321239	-0.366366	-0.29903	-0.345577
142688	1.16391	0.839878	1.05731	1.04499	0.832453	0.957636	0.221734	0.295926	-0.168685	1.05526	0.869161	0.857681
68380	0.353148	0.31338	0.051267	0.172097	0.309272	0.471985	0.457263	0.868133	0.988447	0.229559	0.0819749	0.440514
80915	-0.815114	-0.492776	-0.615687	-0.582734	-0.799323	-0.650311	-0.933668	-0.944069	-0.84403	-0.59095	-0.613697	-0.616357
69065	-2.39571	-1.46587	-2.41572	-1.68434	-1.7849	-2.13485	-2.17674	-1.22699	-1.26378	-1.81854	-1.80786	-1.59197
15569	-0.420698	0.00108377	-1.01798	-0.170334	-0.0149123	-0.0531082	-0.288943	-0.296318	-0.272893	-0.542031	-0.70668	-0.430713
100048642	-0.985699	-0.0110837	-0.68361	-0.75178	-0.64519	-0.0427867	-1.2621	-1.37673	-1.30176	-0.703983	-1.47991	-1.21397
71300	-0.163602	0.00304566	0.129164	-0.0376288	0.215201	-0.247538	-0.261101	-0.0371715	-0.44784	0.0197992	-0.256545	0.182977
238328	0.823231	0.864134	0.662685	0.454141	0.815086	0.75147	1.18282	1.18928	1.08656	0.918135	0.752405	0.683506
192192	0.125052	0.195667	-0.0530856	-0.148277	-0.11622	-0.192972	0.370902	0.149369	0.261758	-0.336718	-0.0854491	-0.212197
99663	0.389702	0.488166	0.414296	0.564066	0.953299	0.514089	0.236912	0.205443	-0.0376532	0.448954	0.459413	0.0417928
232784	0.0943466	0.0465638	0.0902155	0.052047	0.0117172	-0.0537736	0.0836872	-0.0118428	-0.0319562	-0.0825924	-0.044205	-0.0823641
52428	0.204008	1.63105	1.16534	-0.18751	0.943168	-0.270647	-1.76391	-1.33085	-1.37946	1.09232	0.845663	-0.727507
50907	0.0358604	0.0223078	0.345218	0.385438	0.260789	0.00956424	0.304169	0.604332	0.783353	0.308126	0.0555395	0.036117
71979	0.0577927	-0.0007354	-0.0832155	0.0896529	0.268025	-0.0305696	0.0300389	0.170397	0.222511	0.28728	-0.142726	0.504366
73804	-1.24718	-1.30892	-1.47801	-1.60189	-1.56926	-1.37697	-0.837494	-1.55706	-1.52141	-1.6605	-1.53352	-1.62404
20443	0.696755	0.863421	0.966189	0.736909	1.00902	0.59975	-0.459993	-1.17219	-1.20238	0.450437	0.247196	0.663996
50768	-0.0131218	-0.123228	-0.0001744	-0.182267	0.122577	0.244041	0.203415	0.314405	-0.0167641	0.151733	-0.24039	0.0666242
50932	0.198891	0.598031	0.272465	-0.104886	0.158758	0.0589278	0.65092	0.796129	1.25178	-0.245551	0.0195581	0.217741
54446	-0.531456	-0.227386	-0.062639	-0.176482	-0.0735259	-0.365744	-0.470461	-0.078749	-0.326303	-0.0113313	-0.246999	-0.163243
54633	-0.241218	-0.633318	-0.050146	-0.16925	-0.217528	-0.261572	-0.101465	-0.238049	-0.0503133	-0.488665	-0.211751	-0.476828
55991	1.11557	1.1866	1.38801	1.0769	0.975442	1.10554	2.11316	1.36699	1.80312	1.58596	1.14902	1.58205
66684	-0.0352004	-0.155332	-0.0552902	0.0267353	-0.123456	-0.0143916	0.0176082	-0.300256	-0.504177	0.509733	-0.0442356	0.0552727
56428	-0.424426	-0.709653	-0.312497	-0.671867	-0.341991	-0.476812	-0.167544	-0.239961	-0.328202	-0.0928634	-0.242593	-0.456254
77015	2.10774	2.47288	2.21989	2.36988	2.33108	2.46976	1.30909	1.39382	1.22836	2.28936	2.52211	2.46321
12345	-0.0159243	-0.0086067	0.0096546	0.153113	0.0338601	-0.135478	0.276036	0.357097	0.583957	-0.0979282	-0.142579	0.221998
12633	0.0219699	0.273429	0.622267	0.193069	0.252106	0.679602	-0.631406	0.0818259	0.0459033	0.633514	0.593793	0.420649
12953	-0.267537	-0.316563	-0.191977	-0.245908	-0.209568	-0.190794	-0.162964	0.0110965	0.271886	0.206582	0.089318	0.300749
67646	-0.12717	-0.635458	-0.0295983	-0.191668	-0.138652	-0.364292	0.00968451	-0.0250647	-0.103556	-0.264822	-0.157412	-0.0036132
13386	0.134434	-0.158899	0.111037	0.113415	-0.117357	0.165931	1.3791	1.12556	1.38091	0.00882941	1.41549	1.66435
13688	0.729653	1.0061	0.359181	0.762944	0.527083	0.927146	0.9944	0.94396	1.32457	0.863039	0.936718	0.887478
270120	-1.20332	-0.0583078	-0.403622	-0.263988	0.118958	-0.020925	0.228276	0.330476	0.394056	0.627584	-0.0935266	0.122672
232664	0.0144764	-0.121088	-0.0567599	0.0556629	-0.0235958	-0.45213	0.140607	0.044231	0.140854	-0.542031	0.0305728	0.025475
17260	1.80214	1.29218	1.71527	1.73795	1.82686	1.8783	2.2414	1.75123	1.75445	1.86428	2.445	1.91656
218952	0.173157	-0.309714	0.310434	0.400625	0.783247	0.110288	0.343424	0.16976	0.299919	0.0255435	0.804542	0.0446307
258340	0.0687589	0.187819	0.126225	-0.267604	-0.153848	-0.423819	-0.119784	0.229657	-0.0230941	0.0894721	-0.191925	0.183686
72486	0.595866	0.881969	0.732498	0.59661	0.878042	0.502474	0.335573	0.387046	0.196558	0.406706	0.45721	0.390141
268885	3.0384	3.98246	2.38377	3.16394	2.7023	3.70022	2.98135	3.11427	3.2622	2.53358	2.73065	3.17161
211586	0.806417	0.954024	0.806721	1.2793	0.900474	1.32351	0.876636	1.16316	1.31318	1.18941	0.893067	1.10812
70620	0.279309	0.110771	0.224698	0.329752	0.442419	0.201937	-0.60131	-1.10146	-1.10743	0.368905	-0.0267038	0.294363
319155	-0.46756	-0.197423	-0.672587	-0.536631	-0.263261	-0.144479	-0.375595	-0.709579	-0.282626	-0.205526	-0.322021	-0.22142
23801	2.08069	2.5114	1.39536	2.31997	1.67837	0.475615	3.04547	2.93139	2.91992	0.317021	2.71229	2.22341
56774	0.412366	0.382739	0.547064	0.470558	0.525998	0.624512	0.757563	0.550169	0.618139	0.36954	0.389506	0.516781
100048834	-2.90454	-2.92694	-2.94997	-2.66354	-2.56931	-2.49201	-2.35862	-2.29494	-1.95439	-2.54994	-2.55275	-2.71946
104318	-0.440071	-0.32013	-0.399213	-0.427429	-0.340544	-0.43008	-0.197639	-0.0080195	0.139588	-0.539066	-0.506212	-0.387435
66607	0.421139	0.25702	0.878739	0.893118	0.92363	1.52532	0.434364	0.875142	0.948567	1.20424	0.794995	0.814403
319625	0.203277	-0.879445	-0.226517	-0.488177	-0.410012	0.229523	-0.718421	-0.383969	-0.214894	-0.459758	-0.349803	-0.561255
66066	1.46994	1.49194	1.45018	1.47203	1.35829	2.10969	1.40003	1.08733	1.04162	1.60115	1.88766	2.01695
14680	-0.12505	0.0508443	-0.103057	-0.1072	0.00733923	-0.134171	0.134719	0.49537	0.480144	-0.0764828	-0.10601	0.0332792
320127	0.649235	0.264155	0.440017	0.395563	0.33677	0.268723	0.477544	0.738781	0.382662	0.0968841	0.366889	0.368148
67993	-0.168842	-0.934378	-0.408976	-0.26688	-0.631441	0.0248089	0.790929	0.945872	0.870075	-0.3004	-1.12597	-0.6471
68045	-0.366781	-0.643544	-0.338953	-0.603888	-0.302915	-0.671508	-0.637948	-0.775211	-0.764975	-0.279646	-0.451873	-0.629186
66492	-0.310671	-0.13821	-0.235335	-0.331425	-0.224523	-0.215476	-0.0995022	0.0104593	-0.0484143	-0.10917	-0.303688	-0.244123
78394	-1.0688	-1.20547	-0.92759	-1.01177	-0.788468	-1.03288	-1.00236	-1.17282	-0.992857	-0.715472	-1.14139	-1.21326
11998	-0.227328	-0.493489	-0.294125	-0.603164	-0.126278	-0.276212	0.300897	0.170397	-0.154759	-0.378967	-0.225703	-0.198953
68311	1.96968	2.76609	2.48959	1.88461	1.94828	1.65018	1.34377	1.68184	1.64804	2.49541	1.89987	2.69095
12051	-0.431298	0.188533	-0.502096	-0.377529	-0.483822	-0.361389	-0.729543	-0.471265	-0.443409	-0.364143	-0.255076	-0.509464
271305	-0.31725	-0.0996857	-0.133759	-0.49107	-0.0691842	-0.232898	0.0418154	-0.181339	-0.418722	-0.0461677	-0.49226	-0.149763
258933	-0.180539	-0.952213	-0.230191	-0.489623	-0.406394	-0.390426	-0.162702	-0.106786	-0.18451	-0.169948	-0.423234	-0.187365
94089	0.269074	0.117192	0.5429	0.569129	0.67615	0.403747	0.70784	0.441208	0.318728	0.826226	0.370561	0.890316
258778	-0.0759946	0.301252	-0.158908	-0.308825	-0.273247	-0.157401	0.0950057	0.207355	0.205782	-0.232209	-0.708883	-0.185946
434585	-0.844358	-0.698952	-0.89599	-0.727553	-0.573138	-1.02126	-0.171469	-0.0698281	-0.0952566	-0.52816	-0.726507	-0.713081
70831	-0.560699	-0.278039	-0.363204	-0.671144	-0.504083	-0.215476	-0.085763	0.0665331	0.0117211	-0.0958282	-0.520164	-0.618012
104718	-0.0950026	-0.424288	-0.0875198	-0.155509	-0.0959583	-0.290247	-0.0759493	-0.359118	-0.19717	-0.147712	-0.150069	-0.0937156
15929	-0.325566	-0.467806	-0.354508	-0.341369	-0.324142	-0.369478	-0.162964	-0.360966	-0.223124	-0.299447	-0.529123	-0.018512
16180	0.100926	-0.716074	0.33199	-0.438277	0.577014	-0.313114	-0.346154	-0.305593	-0.0661384	0.454884	0.191388	-0.13152
18946	2.28831	0.64155	0.315823	0.516336	0.699306	2.05961	0.419534	-0.436219	0.222638	0.0197992	2.06389	-0.0419244
67488	-0.519759	-0.984317	0.0828668	-0.0260577	-0.141547	-0.431804	-0.174741	0.155104	0.736511	-0.44864	-0.220563	-0.120675
16578	-0.931356	-0.0397591	-0.196387	-0.630646	-0.626376	-0.781705	-0.460647	0.167211	-0.0477813	-0.630975	-0.362286	-0.307265
19059	0.391164	-0.0204969	0.189424	0.138107	0.172362	-0.055044	0.319216	-0.195994	0.121231	0.0346232	0.0694915	-0.0128362
19156	-0.239025	-0.523452	-0.344832	0.3089	0.221713	0.0932283	1.35162	1.12376	1.53853	-0.99787	0.134321	0.142774
71472	-0.620648	-0.678263	-0.62776	-0.772391	-0.865896	-0.669911	0.0849957	0.0561467	0.225043	-0.861489	-0.544396	-0.432132
66860	-1.13313	0.0108932	-0.776205	-1.22222	-1.81602	-1.52651	-0.402419	-0.308142	-0.211729	-1.7702	-0.806547	-1.46937
19349	0.062033	0.134076	0.252938	-0.0029156	0.197653	0.0240829	-0.077912	0.357097	0.368735	0.129682	0.2002	0.239532
108138	-1.31371	-1.34887	-1.13115	-1.22872	-1.12568	-1.60709	-1.20584	-1.60803	-1.25239	-1.00306	-1.37931	-1.23241
26951	-0.5522	-0.787415	-0.588689	-0.45708	-0.527963	-0.391878	-0.287271	0.0754539	0.0300782	-0.367478	-0.383765	-0.643553
73988	-0.78514	0.431093	-0.737256	-0.342815	-0.512043	0.858182	1.94175	2.27954	2.21901	-0.610222	-0.213954	-0.773386
74055	3.61887	3.32826	3.36357	3.4496	3.61914	3.53906	3.10042	2.9263	2.70325	3.32766	3.55088	3.5714
280621	1.98711	1.57969	1.4174	1.92728	1.32958	1.53621	1.34508	1.27977	1.20493	1.32135	1.72904	1.69982
50524	0.606832	0.453922	0.528937	0.669652	0.47643	0.579423	0.119671	0.097756	0.0180511	0.302197	0.435181	0.436257
50883	-0.979607	-0.711793	-1.06428	-1.11301	-1.02292	-0.9719	-0.58888	-1.3659	-1.30683	-1.07866	-1.01142	-1.55309
53311	3.25206	3.2505	3.29472	3.7895	3.13503	3.08051	3.51653	3.11809	3.09572	3.43624	3.50976	3.63667
53311	3.33327	2.89451	3.28436	3.10223	2.92482	3.09624	3.33334	2.86994	3.01722	3.21419	3.12424	3.07033
217207	-0.400593	-0.242368	-0.256647	-0.30087	-0.433168	-0.405671	-0.251288	-0.161585	0.10414	-0.357472	-0.540725	-0.525072
54380	-0.413021	-0.0682956	0.0767428	-0.0411001	-0.26384	-0.134171	-0.0105245	-0.0551725	-0.128299	-0.0467352	0.0195581	0.0141235
76426	-0.508062	-0.4533	-0.804865	-0.159993	-0.373107	-0.77009	-0.286617	-0.171781	-0.758645	0.208805	-0.208814	-0.200845
171185	-0.0180932	0.0627345	-0.0489212	-0.0716188	0.621878	-0.405671	-0.514295	-0.145109	-0.180079	0.0464824	-0.086367	0.274498
56177	-0.0116597	-0.212048	0.0973806	0.893118	-0.153366	0.415362	0.202924	0.866222	0.872607	0.0348703	0.220614	0.310681
66720	-0.815846	-0.837354	-1.13776	-0.720321	-0.957073	-0.682978	-1.34061	-1.25362	-1.40811	-0.428627	-0.338788	-0.752102
66966	0.0965399	0.157143	0.262912	0.132321	0.13922	0.132973	0.484741	0.497282	0.324425	0.0968841	0.141454	0.0332792
12424	1.91839	1.58967	1.71503	1.74287	1.74326	1.77794	1.15593	1.23452	0.978318	1.78089	2.04921	1.59056
12550	4.64969	5.02119	4.65086	4.3977	4.65754	4.59675	3.94571	3.61065	3.7762	4.59894	4.19928	4.30428
67210	0.0857826	0.34477	0.336399	-0.0188258	0.296247	0.0923208	0.0601343	-0.0838466	-0.228821	0.346669	-0.114087	0.206389
67291	-0.579707	-0.298728	-0.674792	-0.671144	-0.736367	-0.765734	-0.871515	-0.678356	-0.644071	-0.61541	-0.512087	-0.759196
225791	0.982606	1.14165	0.828032	0.916261	0.713327	0.770072	0.759002	0.829264	0.709925	0.930735	0.933781	0.781768
13011	-4.06256	-3.38281	-3.8039	-3.80401	-3.33853	-2.56388	-3.1182	-3.69742	-3.21913	-3.42604	-3.42659	-3.50484
100044746	-0.133019	-0.105393	-0.8481	-0.659573	-0.72175	-0.501204	1.54593	0.680159	0.543445	-0.823687	-1.05768	-0.891867
13108	-0.234638	0.275569	-0.175075	-0.0224417	-0.402052	0.993932	0.217808	-0.32662	0.0190006	0.0887309	-0.0296411	0.105645
67686	-0.207589	-0.0433261	-0.0898294	-0.0094243	0.103039	0.159107	0.306131	0.112412	0.0819846	0.274031	0.159812	0.427034
13610	0.0746075	-0.549135	0.496603	0.304441	-0.210291	-0.494235	0.0771447	-0.352109	-0.432015	-0.25148	-0.650872	0.176592
226610	-0.470777	0.123612	-0.363939	-0.0036388	0.0625157	-0.0172954	-0.406999	-0.138009	-0.606724	-0.262598	-0.114822	0.0715904
14133	0.695293	0.0223078	0.819949	0.893118	0.810745	1.92458	0.0634055	-0.46107	-0.651667	0.978913	0.416089	1.36992
27029	0.785946	1.53617	0.946348	0.791148	0.833901	0.704284	1.04674	1.40211	1.45814	0.778789	0.996198	0.954878
71382	-0.23537	-0.0126494	-0.225047	-0.0810202	-0.0974056	-0.173371	-0.0229552	0.433561	0.464952	0.0916957	0.114285	0.193619
70405	4.32042	5.54055	4.62882	3.93507	4.58421	5.05336	3.82322	3.40483	3.49134	4.84205	3.91951	4.45894
232035	0.436491	0.137881	-0.23901	-0.182629	0.309272	-0.303314	-0.0785663	0.555267	-0.007269	-0.519054	0.324299	-0.351962
101744	1.13906	0.889104	0.562742	1.7689	0.639969	-0.241609	2.96049	3.26019	2.87657	0.237712	1.56529	0.43271
22688	-0.503675	-0.262344	-0.350711	-0.974162	-0.203055	-0.661291	-0.0124872	-0.0621817	-0.0939906	-0.481994	-0.538522	-0.518687
22129	-0.0558899	-0.190824	0.146801	0.140999	0.223161	0.0552982	-0.0576303	-0.213199	-0.0452493	-0.0118872	-0.031844	0.149632
22235	0.210588	-0.473157	-1.48683	-0.651377	-1.38691	-1.56426	-0.0818375	-0.875889	-0.797891	-1.261	-0.400324	-0.284562
674873	-0.369644	-0.402172	-0.173054	-0.295085	0.0591388	0.0846985	-0.0822113	-0.326541	-0.368081	0.272178	-0.193393	-0.295204
22419	2.42356	2.13892	2.82763	2.46461	2.6502	2.69843	1.56098	1.25428	1.20177	2.31752	2.12403	2.48804
22688	0.505944	0.195667	0.093155	0.293593	0.0574503	-0.0630293	-0.0334231	0.373664	-0.100954	0.297008	0.137783	0.237606
56458	0.282234	0.174265	0.307739	0.550085	0.324468	0.328008	0.156374	0.186646	0.438366	0.256772	0.546797	0.73849
24017	-0.677672	-0.375063	-0.292656	-0.446232	-0.488163	-0.343966	-0.569906	-0.849763	-0.66496	-0.467911	-0.506946	-0.343448
26905	-0.616261	-0.818805	-0.578523	-1.12242	-0.578617	-1.15919	-0.517567	-0.383331	-0.521901	-0.837029	-0.629577	-1.04369
52477	-0.0410856	0.057265	0.00864415	0.0267353	0.168889	0.068365	0.0143369	0.1105	-0.0268922	0.0260994	-0.0300082	0.35254
629862	0.0286958	-0.0672968	-0.0097278	-0.0224417	0.0617921	0.0465869	-0.0707153	-0.202366	-0.242747	-0.0441912	0.0969759	0.164176
105670	-0.26242	-0.573391	-0.311028	-0.412965	-0.408565	-0.247417	-0.639911	-0.898191	-0.824477	-0.706578	-0.501806	-0.522234
100044361	-0.33772	-0.177368	-0.238128	-0.150447	-0.266855	-0.255765	-0.266859	-0.360392	-0.299717	-0.0911957	-0.150069	-0.172821
258915	-0.200278	-0.360795	-0.454329	-0.50481	-0.32173	-0.286527	0.272111	0.0289382	-0.0927246	-0.102911	-0.140963	-0.20794
100047052	-0.0094665	0.191315	0.0793557	0.200301	0.0798827	0.266545	0.268839	0.477528	0.387093	0.22643	0.126034	0.346154
11764	0.0681323	0.695769	0.496603	0.232363	0.264528	0.248832	0.354546	0.462873	0.316829	0.385705	0.275394	0.286244
14282	-1.49429	-1.72413	-1.85794	-1.8579	-1.30441	-1.2826	-1.66577	-1.5424	-1.60054	-1.28842	-1.89627	-1.17494
14615	0.00954157	-0.176556	-0.0574948	0.110047	-0.190174	-0.0495995	-0.207453	-0.081935	-0.387072	-0.108676	0.152469	-0.265204
209683	-0.134481	0.227057	-0.216228	0.111349	0.0632393	0.0353349	-0.285963	-0.127813	0.134524	-0.0002132	-0.0754134	0.368148
68969	-0.289226	-0.344243	-0.146782	-0.0434143	-0.183083	-0.256491	-0.102773	-0.225305	-0.40353	-0.131962	-0.319329	0.364601
15354	-0.367256	-0.220966	-0.119041	-0.351373	-0.0800386	-0.126186	0.183787	-0.325346	-0.280094	-0.186699	-0.336732	0.0779756
69179	0.177933	0.389715	0.200447	-0.0344467	0.271463	0.106404	0.189021	0.383222	0.353543	0.410412	0.259155	0.295782
16202	0.102023	-0.137675	0.0894807	0.0571093	0.139944	0.0153717	-0.464572	-0.401173	-0.1402	-0.126032	-0.132323	-0.125358
76608	-0.121321	0.0995601	0.0534717	-0.191668	-0.135034	-0.0855333	0.257717	0.176769	0.217447	0.0331408	0.00854333	-0.0256067
19119	-1.83862	-1.37883	-1.98508	-2.4162	-1.66903	-1.62742	-1.68213	-1.59465	-1.63725	-1.74945	-1.69661	-1.78934
19258	-1.2428	-0.94936	-1.2186	-1.42182	-1.23133	-1.04377	-1.10443	-0.68664	-1.07515	-0.877795	-0.972502	-0.774805
19300	-1.56447	-1.07421	-1.5853	-1.11663	-1.34349	-1.45247	-0.586263	-0.609538	-0.609889	-1.15278	-1.10468	-1.34451
228889	-0.41357	-0.653829	-0.496217	-0.817229	-0.585853	-0.485523	-0.423355	-0.452786	-0.428217	-0.437522	-0.603876	-0.129189
71801	0.794719	0.919067	1.00367	1.08983	0.98948	0.658429	0.35978	0.443119	0.177568	1.182	0.916158	1.12373
71856	-0.27631	-0.258301	-0.470496	-0.115733	-0.163979	0.0393276	-0.179881	-0.0602701	-0.68585	-0.172913	-0.146397	-0.43426
226123	-0.641118	-0.674934	-0.684198	-0.950296	-0.743845	-0.605787	-1.08349	-0.965097	-0.81878	-0.790519	-1.04667	-0.909071
72544	-0.231714	-0.595507	-0.167726	-0.0395091	-0.0199776	-0.150867	-0.048798	0.379399	-0.735224	0.107261	0.20534	-0.0135457
72098	-0.211244	-0.14035	-0.368348	-0.561942	-0.242854	-0.497138	-0.271642	-0.358481	-0.279461	-0.285576	-0.20766	-0.404463
227743	0.612681	0.724305	0.645048	0.499702	0.655165	0.369628	0.793546	0.600508	0.701696	0.457849	0.367624	0.29933
229007	0.592211	0.538105	0.413562	0.452695	0.433736	0.515541	0.631947	0.561639	0.62257	0.294044	0.542391	0.527069
234582	-0.0379785	-0.409877	-0.0832155	0.0101019	-0.259208	-0.113119	-0.55355	-0.245696	-0.17818	-0.336274	-0.357146	-0.373246
100040023	0.967985	1.81297	0.813335	0.162695	0.125471	0.837027	3.22604	1.62414	1.76965	0.0976253	0.281709	0.849471
27412	1.1895	0.972573	1.26381	0.945188	1.23262	0.579133	0.541006	0.569285	0.530151	0.390251	0.905877	0.841363
244416	0.802761	0.582336	0.462063	0.63277	0.756473	0.405925	-0.297821	-0.312602	-0.442143	0.257725	0.485114	0.412844
74144	3.3418	3.67997	3.36399	3.30062	3.14673	3.33362	3.35493	3.07365	3.17245	3.46416	3.1404	3.36825
74201	-0.938667	-0.647586	-0.891581	-0.778177	-0.894841	-0.728712	-0.851233	-1.0199	-0.924492	-0.662106	-0.942396	-0.838657
676549	-0.0752635	0.113625	-0.131717	-0.163464	0.038636	-0.0165694	-0.227735	-0.807708	-0.898539	-0.128441	-0.296198	-0.185946
53895	-0.311158	-0.304673	-0.402244	-0.531568	-0.177004	-0.439167	0.124251	0.0544263	0.0243812	-0.510489	-0.507995	-0.522234
76257	0.77498	0.891244	0.659011	0.66676	0.794101	2.22149	0.771956	0.30867	0.781454	0.812884	0.724501	0.629232
54636	-0.399862	-0.343673	-0.142741	-0.195284	-0.187714	-0.521094	-0.187826	0.0104593	0.0250142	-0.307441	-0.221298	-0.259731
76651	-0.423257	-0.0540273	-0.0927689	-0.462142	-0.556184	-0.50222	0.134719	-0.0742886	0.0984427	-0.101017	-0.443795	-0.529329
56264	2.72403	2.99938	2.59877	2.59913	2.58001	2.85305	2.38337	2.29865	2.26078	2.54367	2.42224	2.44405
66880	-0.841433	-0.715717	-0.782819	-0.8787	-0.746601	-0.757334	-0.68826	-0.900102	-1.00172	-0.754015	-0.718744	-0.709534
12961	-0.312133	-0.135356	-0.542514	-0.0528158	-0.191477	-0.293877	-0.0113968	0.111137	-0.0946236	0.333327	-0.200737	0.257471
269713	0.188656	-0.340819	-0.0163417	-0.718152	-0.395539	-0.712015	-0.426626	-0.681542	-0.261737	-0.185513	-0.741927	-0.598857
13180	0.0490198	-0.646159	-0.385985	-0.546032	-0.320282	-0.304524	-0.581029	-0.716588	-0.63331	-0.23295	-0.21836	-0.295914
270627	-0.279234	-0.698952	-0.473435	-0.261095	-0.16615	-0.314203	-0.529997	-0.474451	-0.737756	-0.158089	-0.468027	-0.427875
16728	1.06814	0.511709	0.848609	0.917707	0.78976	0.544578	0.82953	0.931216	1.22329	0.479344	0.644461	0.733524
217615	0.0446333	0.249173	-0.0652845	-0.275559	-0.0286611	-0.066659	0.172665	0.324175	0.378864	-0.0254141	0.0483013	0.0574011
319888	-0.0350542	0.0287285	0.2732	-0.25314	-0.231276	-0.456486	-0.272878	0.141086	-0.0427173	0.0109048	-0.76616	-0.050438
70354	1.34083	0.847726	1.31305	1.14913	1.26301	1.35472	1.15665	1.29761	0.959328	1.81573	1.18785	1.41674
30841	-0.399131	-0.0747163	-0.221372	-0.236506	-0.212462	-0.282262	-0.480274	-0.186436	-0.004737	0.00719877	-0.0311097	-0.111452
18127	0.131632	0.141448	0.168113	0.217658	0.323021	0.284694	-0.0190297	0.462873	0.516225	0.203617	0.373498	0.302877
20753	1.47358	1.99989	1.65201	1.96561	1.52672	1.51782	1.6722	1.7239	1.86896	1.45615	1.54458	1.67499
103511	1.29405	0.882683	1.37258	1.45359	1.27821	1.17324	0.419971	0.301661	0.121231	1.45254	1.49774	1.1138
224530	-0.370619	-0.697525	-0.277223	-0.664636	-0.300744	0.477792	-0.316713	0.0276638	-0.0338552	-0.33746	-0.661153	-0.609499
224530	-0.801955	-0.642592	-0.709331	-0.660296	-0.339097	0.290501	-0.458684	0.187601	-0.0173971	-0.18329	-0.686119	-0.569769
320068	-0.894802	-1.08348	-0.540309	-0.5887	-0.701633	-0.821631	-0.678512	-0.577041	-0.370613	-0.778474	-0.72871	-0.649229
21946	2.21447	2.42651	1.48582	1.46219	2.06045	1.9587	2.13475	1.06503	1.30432	2.00325	1.51925	2.05881
22290	-0.120347	-0.273901	-0.0995053	-0.396332	0.00227385	-0.661926	-1.10443	-0.845303	-0.374411	0.339257	-0.201716	-0.337063
23945	4.37554	4.20326	3.80943	4.56114	4.33842	3.8275	3.54728	3.31817	3.10458	4.341	4.00763	3.49264
20740	-1.39559	-0.056881	-1.25828	-1.31768	-1.23929	-0.649585	-0.719729	-0.346374	-0.137035	-0.95488	-0.401939	-0.653486
58861	0.450382	-0.0982589	0.324641	0.415812	0.371504	0.306472	-1.04031	-1.19067	-0.888411	0.670574	0.571029	0.0382454
216805	0.0643724	-0.081137	-0.0516158	-0.125135	-0.301468	-0.135623	-0.0824917	-0.0532609	-0.001572	-0.564267	-0.235331	-0.380341
66245	0.280772	0.300539	-0.0067883	0.0455382	0.218095	-0.0143916	0.616245	0.485812	0.70043	-0.321153	-0.0568108	0.0474685
66245	-0.0080043	-0.044753	-0.213289	-0.235783	-0.205226	-0.264839	0.445486	0.440571	0.766262	-0.187737	-0.292526	-0.083783
78330	-0.209782	-0.223106	-0.238275	-0.0976536	-0.156019	-0.310573	-0.10539	-0.443229	-0.15919	-0.330048	-0.192659	-0.469024
14200	0.38166	-0.429282	0.102708	0.241523	0.0733701	-0.0408364	-0.573832	-0.661789	-0.706739	0.323692	0.0342444	-0.0319919
258817	-0.285083	0.169271	-0.0200161	0.201024	-0.379981	0.0044827	0.201452	0.0651171	-0.0737345	-0.307812	0.191388	0.0297318
14693	0.124483	-0.0201799	0.0954413	0.14382	0.152064	0.0740918	-0.070061	0.0123709	0.258593	-0.0507796	-0.0782528	-0.0691502
68682	0.0386802	-0.25949	-0.0258951	-0.0528158	-0.0112941	-0.0151176	0.221734	0.375576	0.756134	-0.209232	0.00413743	0.221288
240215	-0.121321	-0.0732894	-0.20594	-0.316781	-0.418695	0.567082	-0.364473	-0.315788	-0.316808	-0.679153	-0.428374	-0.411557
78914	-0.112548	-0.157472	-0.515323	-0.47299	-0.376001	-0.044155	-0.45803	-0.598706	-0.692813	-0.355249	-0.249936	-0.305846
66531	-0.633807	-0.783134	-0.704187	-0.886655	-0.631441	-0.624903	-0.278112	-0.447052	-0.476958	-0.647282	-0.570832	-0.596019
246104	0.0365915	0.138594	0.154885	0.154017	0.103039	0.331879	0.576336	0.498556	0.514326	0.136909	0.151735	0.11274
69036	0.36119	-0.454965	0.069639	-0.702242	0.0842245	-0.28444	0.170048	0.25387	-0.0756335	-0.246292	0.0188238	0.080104
69226	-0.317981	-0.746037	-0.562356	-0.730446	-0.620659	-0.645229	-0.364473	-0.715951	-0.777002	-0.592433	-0.510618	-0.635749
19043	0.472314	0.0137468	0.421829	0.350002	0.508269	0.506394	0.67709	0.582667	0.480144	0.31875	0.282653	0.816532
17762	0.792526	0.871982	0.716331	1.18456	1.09296	1.11226	2.70591	2.47834	2.1652	1.70847	1.24807	1.31883
107338	-0.215631	-0.14035	-0.309558	-0.30087	-0.279036	-0.27718	-0.113241	-0.143744	0.161743	-0.377485	-0.379175	-0.311522
71177	-0.932087	-0.54212	-0.4885	-1.04937	-0.641572	-0.459632	-0.37223	-0.256528	-0.24186	-0.0079959	-0.621499	-0.345293
20262	2.93532	2.25243	2.56161	2.82115	2.65961	2.86394	3.0579	2.80905	2.82669	2.49763	2.60508	2.66399
20302	-3.47185	-2.97117	-3.26597	-3.43157	-3.26399	-3.17294	-2.41292	-2.5135	-2.26963	-3.3371	-3.2386	-3.22602
72136	-0.0981097	-0.161039	0.0380392	-0.106252	0.0711992	-0.0819036	-0.245399	-0.213836	-0.135769	-0.0958282	-0.124368	-0.108614
26754	-0.119615	-0.0744487	0.138927	0.0889297	0.135361	-0.0541567	-0.140356	-0.13546	-0.0309012	0.029583	-0.0062654	0.102186
26968	0.529582	0.588757	0.654846	0.586305	0.42867	0.320385	0.525959	0.486449	0.521289	0.140318	0.412233	0.536292
20522	-0.571666	0.0116066	-0.564854	-0.729723	-0.747945	-0.0935186	-1.19478	-1.59593	-1.74866	-0.746602	-0.260216	-0.237028
27204	0.304897	0.270575	0.258094	0.0469846	0.299141	0.241863	0.234949	0.210541	0.400386	0.305162	0.0885837	0.293654
27204	0.139673	-0.0845002	-0.0692529	0.0838674	-0.205226	0.0400535	-0.0471624	0.144272	-0.19084	-0.0995342	-0.224235	0.00358287
74106	0.0548684	-0.235947	0.376818	0.34277	0.409132	0.455288	0.50306	0.464784	0.46875	0.374093	0.510815	0.620718
28253	1.51556	2.47431	1.42622	1.59244	2.59014	4.31944	0.149766	0.198434	0.0142531	2.16067	2.0752	1.1741
225348	-1.17042	-1.16766	-1.09808	-1.25693	-1.06706	-1.04667	-1.00236	-0.866968	-0.847899	-1.03715	-1.21262	-1.00467
108857	-0.0178739	0.416111	-0.0968108	0.105473	0.19512	0.174352	-0.0595931	0.0429566	0.0737555	0.247348	0.060588	0.376662
54128	-0.0494321	-0.330118	-0.2346	-0.439723	-0.239236	-0.173371	0.568485	0.443757	0.952365	-0.446416	0.0342444	-0.359057
74721	-0.451038	-0.20313	-0.220638	-0.251693	-0.187135	0.00811237	0.427167	0.146821	0.0566644	0.0805777	-0.306478	-0.0234783
55934	-0.0504068	0.25702	-0.236805	0.119304	0.135059	0.377613	0.0221879	-0.0857582	-0.0446163	0.152196	0.0683493	0.116287
258067	0.070221	0.0808076	0.0167278	-0.253863	0.0371888	-0.154981	0.188367	-0.145655	-0.0984216	-0.210879	-0.216892	0.0730094
258067	-0.0387096	-0.056881	0.162234	0.143892	0.0234399	-0.044155	0.389875	-0.0430657	-0.0591754	-0.091381	-0.0281725	-0.185946
67088	1.37873	0.874122	1.74589	1.80868	1.64581	1.57976	1.74482	1.31035	1.33407	1.28325	1.49994	1.61184
67219	0.118472	0.180685	0.477496	0.0600021	-0.0824989	-0.021651	-0.0242637	-0.263537	-0.342128	-0.153536	-0.346131	-0.251217
67299	-0.45518	-0.37863	-0.535165	-0.488177	-0.344886	-0.415834	-0.569906	-0.768839	-0.69028	-0.370073	-0.367426	-0.493855
100040340	0.00734834	0.0229023	0.161058	0.217513	0.189693	0.212826	0.274073	0.258968	0.392157	0.250807	0.246462	0.41852
233833	-0.368913	-0.293654	-0.454958	-0.417384	-0.419212	-0.243787	-0.234212	-0.170697	-0.15938	-0.417695	-0.248152	-0.35007
93759	0.0278185	0.148582	0.0505322	-2.28e-05	0.129813	-0.144334	-0.104736	-0.287114	-0.360485	0.06353	0.171561	0.0448967
94213	-0.275579	-0.498483	-0.263995	-0.608227	-0.37166	-0.567119	-0.437094	-0.476363	-0.516204	-0.779215	-0.541092	-0.805312
228361	-0.473701	-0.0747163	-0.44698	-0.468651	-0.780508	-0.454308	-0.248016	0.00918491	-0.272498	-0.698425	-0.365958	-0.495984
13347	-0.0876918	-0.386477	0.0762529	0.0795282	0.0162036	-0.219831	0.0738735	0.613252	0.731447	0.371128	0.0232296	-0.141959
76295	0.192311	0.208508	-0.262526	0.0773587	0.0147564	-0.703304	-0.187898	-0.576404	-0.200019	0.468967	-0.0098146	0.215612
59057	-0.153489	-0.300154	-0.189773	0.140999	0.0632393	-0.043429	0.10266	-0.0424285	0.0997087	0.0353644	0.0283698	-0.0057416
69608	-0.13375	-0.483501	-0.272814	-0.261818	-0.241407	-0.290973	-0.202873	-0.201092	-0.372512	-0.290023	-0.187519	-0.427875
16818	-2.36866	-2.08368	-2.38853	-2.07847	-2.53675	-1.85464	-2.32198	-2.60271	-2.58106	-2.49732	-2.25241	-2.20722
269615	2.24445	2.83672	2.3119	2.00466	2.24063	2.07884	2.58946	2.23111	2.27724	2.12802	1.81423	2.28016
98221	-1.01689	-0.761911	-1.06428	-0.757927	-0.54533	-0.704756	-0.991242	-1.04156	-1.00298	-0.494965	-0.902008	-0.559836
17222	-0.776124	-0.681652	-0.672587	-0.654872	-0.277588	-0.696771	-0.802164	-0.95745	-1.1087	-0.611704	-0.696033	-0.649229
17312	2.88268	3.24836	3.05398	3.2999	2.7497	3.42291	2.46973	2.18778	2.08797	2.21727	2.7146	3.01659
100043416	-0.444458	-0.0904113	-0.469761	-0.429598	-0.674135	-0.418737	-0.428589	-0.543269	-0.566212	-0.385638	-0.430577	-0.756359
68219	-0.423988	-0.0055153	-0.0660684	-0.329798	-0.0906517	-0.385707	-0.463264	-0.561748	-0.699143	0.0835425	-0.192659	-0.278
269003	-0.586287	-0.663995	-0.676996	-0.64077	-0.621311	-0.784609	-0.581029	-0.587236	-0.721298	-0.648764	-0.601673	-0.475409
18242	0.370276	0.257179	0.237852	0.279129	0.371504	0.0428665	-0.0236094	-0.40882	-0.494682	0.441542	0.0157816	0.183686
18405	-1.11266	-0.569824	0.00836857	-0.517828	-0.289166	-0.472457	0.590729	0.987927	0.863745	0.162851	0.0562739	0.0552727
20933	0.619992	0.578769	0.430464	0.361573	0.46847	0.513363	0.777844	0.935039	1.01187	0.366681	0.528439	0.535582
269109	0.536649	0.363319	0.104913	0.230675	0.117511	0.295583	0.355854	0.596048	0.401019	0.289596	0.443993	0.236896
252966	0.0453644	0.264868	-0.0935038	0.078805	-0.0047815	0.14604	0.0836872	0.0639843	0.0598294	-0.0313437	0.091521	-0.0355392
244631	0.127245	0.182826	0.15562	0.0932689	0.237633	-0.0521402	0.181824	0.150644	0.223777	0.059824	0.023964	-0.18169
235380	0.113355	-0.128936	0.045388	0.402072	-0.0785913	0.242589	0.0588258	-0.137372	0.107938	0.164333	-0.0076116	0.122672
329910	-0.334248	-0.610489	-0.216228	0.280575	0.00028388	-0.0143916	-0.187171	0.171432	0.280326	0.425236	0.0570082	-0.215744
56631	-0.195404	0.085088	0.260707	-0.717429	0.291905	-0.364292	0.0339644	0.0767283	-0.0609953	0.0323996	-0.305009	-0.282434
625347	-0.630883	-0.64673	-0.729173	-0.464312	-0.572104	-0.791384	-0.537194	-0.590422	-0.803588	-0.419733	-0.570391	-0.453889
100763	0.0672967	0.0822344	-0.0009093	0.00865548	0.145009	0.10684	0.0562088	-0.0863954	-0.0428439	0.0716832	0.174499	0.0719958
58240	-0.64258	-0.411447	-0.513119	-0.940895	-0.0684606	-0.6808	-0.490088	-0.034782	-1.13971	-0.378473	-0.635451	-0.42078
103583	-0.13704	0.00176152	-0.0799611	-0.0178133	0.179381	0.0589278	-0.278112	0.118784	-0.0018885	0.00910471	-0.0280676	-0.0567444
108017	1.41979	1.40276	1.64742	1.18023	0.926525	1.0937	1.31793	1.28741	1.47246	1.18645	1.78265	0.807309
224650	0.941666	0.998256	0.772182	0.810675	0.555124	0.728966	0.613628	0.427189	0.551041	0.512945	0.470218	0.517136
65964	0.421139	0.961158	0.805251	0.637832	0.864293	0.608461	1.03496	1.24153	1.10175	0.759518	0.831711	0.703726
66132	-0.382316	-0.676123	-0.286042	-0.420197	-0.17411	-0.411478	-0.0026735	-0.231677	-0.432015	-0.393791	-0.570832	-0.503078
77974	0.993573	1.27292	0.676648	0.98858	0.88166	0.555467	1.93913	1.91697	1.7221	0.730611	0.932312	0.903796
68114	-0.115473	-0.0896979	0.326111	0.010825	-0.0510935	-0.124734	-0.0098702	-0.217022	-0.0895596	-0.267787	-0.397533	-0.263988
66431	-0.339914	-0.503477	-0.186588	-0.189499	-0.199437	-0.146512	-0.0255722	-0.39735	-0.352256	-0.0898985	-0.172098	0.0779756
11771	-0.0504068	-0.660428	-0.169931	-0.256032	-0.122009	-0.460842	0.230893	0.0920212	0.552307	-0.588727	-0.244796	-0.304428
11975	0.679209	0.956164	0.575969	0.49681	0.624049	0.393584	0.731393	0.933765	1.31571	0.29182	0.664287	0.760484
78541	0.0520659	-0.18696	-0.0007255	0.155897	0.185351	-0.0229214	0.38595	0.0809339	0.0697766	0.408188	0.316222	0.402912
14369	-0.0526001	-0.0996857	0.15415	-0.175758	0.120406	-0.101504	-0.10539	-0.301133	-0.232619	0.019058	-0.0083459	-0.0766883
666114	0.111161	0.105064	0.368734	0.269728	0.258618	0.244767	0.235473	0.151281	0.130093	0.362605	0.46235	0.231043
78749	-0.24463	-0.364362	0.015699	0.412919	-0.151677	-0.14748	-0.6844	-0.671347	-0.180633	-0.232394	0.100333	-0.0969791
14768	-0.603833	0.212075	-0.327195	-0.416581	-0.163255	-0.250321	-0.245399	-0.351471	-0.38897	-0.418251	-0.17063	-0.149763
14955	2.22544	2.26813	2.21034	1.96706	2.19178	2.12721	2.3886	1.93226	2.15697	1.95211	1.87958	2.06356
383883	-0.494902	-0.312996	-0.560886	-0.619798	-0.724066	-0.476812	-0.431206	-0.477	-0.416823	-0.622081	-0.457013	-0.237028
69073	2.107	2.44292	2.01792	2.11603	2.12543	2.17442	2.0641	1.96986	1.88225	2.24192	2.03893	2.04391
100048721	1.50094	0.416111	0.983826	1.02836	1.08862	1.11516	0.392492	0.0525147	-0.19084	1.12122	1.12984	0.926499
18707	-0.49344	-0.111814	-0.313232	-0.378975	-0.245749	-0.516013	-0.986008	0.170397	-0.0496803	-0.025167	-0.32557	-0.317907
16332	-0.0884229	-0.273045	0.0747831	0.063618	-0.120996	-0.139543	0.180516	0.236666	0.185164	-0.269084	-0.0513768	0.0479415
104806	-0.116935	-0.447831	-0.206675	-0.465035	-0.343438	-0.259758	-0.312133	-0.693649	-0.608623	-0.159571	-0.600204	-0.128479
71238	-0.44874	-0.390877	-0.221372	-0.280621	-0.427668	-0.63434	-0.113241	-0.791141	-0.0319562	-0.219185	-0.435718	0.0978407
192199	3.61321	4.42406	3.80649	4.02092	3.65821	3.84807	3.11547	3.1748	3.20839	3.99449	3.75502	3.76295
71687	1.09665	0.632989	1.02351	1.14985	1.16026	1.37723	1.2247	0.72986	0.688403	1.46736	1.35234	1.47208
19385	-0.20832	-0.181015	-0.468186	-0.475883	-0.190753	-0.50222	-0.425318	-0.714677	-0.904236	-0.415582	-0.633039	-0.774095
74039	-0.297511	-0.591227	-0.555742	-0.459973	-0.363596	0.191048	0.00321473	-0.568757	-0.253508	-0.464946	-0.709617	-0.654905
14107	0.224479	0.232764	0.250419	0.0715731	0.443866	-0.16466	0.0954637	-0.357843	-0.143365	0.290338	0.24793	0.184396
320183	0.757434	0.459629	0.811865	0.932171	0.705095	0.585231	0.597272	0.422092	0.67321	0.614983	0.794445	0.607239
20658	-0.229765	0.0292381	-0.0975456	-0.231685	-0.261669	-0.303858	-0.713187	-0.573855	-0.477169	-0.254551	-0.165122	-0.203801
240725	2.90973	2.66479	2.68424	2.47944	2.80361	2.3533	2.42328	2.2139	1.99366	2.51849	2.53459	2.64128
74782	0.249335	0.0829478	0.775121	0.977732	0.811468	0.594668	-0.170815	-0.563022	-0.819413	1.25019	0.625368	0.0176709
66695	2.97626	2.16976	2.30252	3.14297	2.37193	2.38103	1.45826	1.22051	1.16885	2.18661	2.70936	2.13575
100044207	-1.34003	-0.678263	-0.724322	-1.31695	-1.19515	-1.0895	0.947949	1.19311	1.05744	-1.28471	-1.12597	-0.610918
12509	1.21655	0.425386	0.884618	0.678331	0.651547	1.10863	0.645032	0.625359	0.728282	0.695033	1.06669	0.883222
67054	-0.580877	-1.17836	-0.812949	-0.53651	-0.441851	-0.64898	-0.981428	-1.05133	-1.10047	-0.472914	-1.12083	-0.687777
12660	-0.52049	-0.761019	-0.971682	-1.19329	-1.2306	-0.870995	-1.15284	-0.911572	-0.906768	-1.53672	-0.976908	-1.12812
77630	1.99149	1.48052	2.59982	2.36481	2.46278	2.1881	1.35031	1.27403	1.00174	2.96459	1.9721	2.39084
218311	0.309284	0.555227	0.347423	0.310949	0.147904	0.0277126	-0.900956	-1.17282	-1.28847	0.015352	-0.0252352	0.169497
67472	-0.0759946	0.157143	-0.0905643	-0.137429	-0.0091233	0.104662	-0.113896	-0.174966	-0.171217	-0.0335673	-0.0699367	0.0644958
74998	-0.10012	-0.19885	0.0946248	0.0665108	-0.263116	-0.020925	-0.0216467	-0.364853	-0.335165	0.227335	0.420494	0.589502
99662	3.01573	0.674366	-0.214024	0.388331	0.624049	0.225893	0.355266	0.0716307	0.149083	0.0383292	2.32825	-0.123513
258834	0.0943466	-0.210265	0.165908	0.538032	0.230397	0.379065	0.664659	0.279996	0.3719	0.442284	0.283912	0.364601
226169	-0.578245	-0.619763	-0.695368	-0.578576	-0.635059	-0.664829	-0.333723	-0.178152	-0.102853	-0.605774	-0.469496	-1.00609
56282	-0.370619	-0.327264	-0.26473	-0.246631	-0.148783	-0.044155	0.179862	-0.0373308	0.0629944	-0.0958282	-0.22093	-0.117364
269593	0.436199	0.761403	0.526182	0.383269	0.487827	0.37863	0.389221	0.728586	0.777656	0.43691	0.370928	0.709402
17095	-0.492709	-0.14035	-0.273864	-0.203963	-0.367318	-0.325455	-0.352042	-0.652231	-0.72383	-0.410838	-0.447467	-0.368989
635676	-1.45426	-1.17673	-1.35602	-1.53335	-0.897736	-1.50474	-1.72596	-1.47887	-1.68663	-1.52227	-2.13125	-1.41474
70099	-0.978145	-1.03481	-1.20243	-1.16436	-1.12857	-1.09241	-1.50483	-1.87884	-1.6765	-1.2773	-1.20308	-1.37076
17190	-0.102313	-0.290167	-0.270609	-0.412603	-0.320282	-0.476812	-0.778612	-0.630566	-0.523642	-0.472914	-0.263153	-0.51443
319481	-0.825349	-0.846628	-0.606448	-0.660369	-0.643019	-0.845587	-0.319329	-0.375048	-0.60166	-0.742155	-0.76616	-0.561255
17879	3.39973	3.59615	3.4076	3.3146	3.664	3.30865	3.24285	3.32391	3.37994	3.23328	3.1475	3.23298
258401	-0.169572	0.0758137	-0.579258	-0.0115939	-0.18207	0.0640094	0.133955	0.192779	0.0480133	-0.0039192	-0.191191	-0.256893
100047223	-0.467121	-0.948646	-0.664504	-0.517105	-0.605391	-0.757749	-1.40211	-1.69979	-1.04919	-0.319671	-0.753676	-0.657743
258255	-0.0167772	0.0237346	-0.245623	0.0361368	0.164547	0.137329	0.067331	0.148732	0.203047	-0.0476501	-0.318962	0.182977
67952	-0.502213	-0.74461	-0.631434	-0.89461	-0.769654	-0.627081	-0.285309	-0.457247	-0.483288	-0.709542	-0.715387	-0.855684
234378	-0.946708	-0.639739	-0.96279	-0.821568	-0.680648	-1.12507	-0.974886	-0.816629	-0.906768	-0.945986	-0.922569	-0.942948
193452	-0.172497	-0.345813	-0.518998	-0.483838	-0.563421	-0.849943	-0.732814	-0.918581	-0.994756	-0.699166	-0.684651	-0.671932
57908	0.86271	0.741427	0.875983	1.23157	1.16749	1.07524	0.941537	0.617076	0.553952	1.29763	1.07624	1.0762
433463	1.75682	1.71452	0.747931	1.54761	0.954023	-0.0136657	3.56232	3.29715	3.29765	-0.0113313	2.36349	1.86512
104799	-0.188743	-0.04832	-0.002379	-0.195491	-0.157467	-0.243061	-0.0962309	0.0818259	0.0351422	-0.189961	-0.166958	-0.0525664
59029	-0.45189	-0.730699	-0.370063	-0.765159	-0.436062	-0.712596	-0.675306	-0.643947	-0.61432	-0.504415	-0.669125	-0.671341
66079	-0.0862296	-0.129649	-0.224312	-0.149	-0.012638	-0.0032606	-0.246054	-0.502488	-0.283259	-0.0427088	-0.185316	-0.124365
67841	0.241293	0.105777	0.204856	0.123643	0.17106	0.00157895	0.00059774	-0.0150288	0.168073	0.203617	0.233978	0.0545632
117167	1.69102	1.35139	2.36099	1.94392	2.10531	2.72529	1.59206	1.51338	1.56448	2.75261	2.48172	2.36459
66510	-0.0357853	-0.0269177	-0.338953	-0.21915	-0.127074	-0.066659	-0.124364	-0.0118428	0.0908466	-0.101758	-0.0120175	-0.0071605
14550	0.142598	0.446788	0.53996	0.127259	-0.380343	-0.1182	0.0339644	0.349451	0.297206	-0.168466	0.381576	0.214193
277328	-1.47382	-0.835927	-1.28988	-0.399948	-0.0434274	-0.547228	-0.979793	-1.26673	-1.27825	-0.490888	-1.84414	-1.00297
11630	1.59614	1.80896	1.63419	1.36507	1.53537	1.19647	1.52221	1.4671	1.83344	1.42734	1.6379	1.64288
80879	-0.44168	-1.7177	-0.356485	-0.291986	-0.295534	-0.239916	0.120325	0.0359474	0.0528664	0.0307937	-0.527066	-0.536424
70840	0.0300118	-0.174594	0.283488	0.149678	0.144285	0.123536	0.301552	0.26534	0.0459033	-0.0402381	-0.117759	0.310681
239447	3.31913	2.68048	2.69609	2.79222	2.5185	2.01928	0.804014	0.855389	0.473181	1.90171	2.81069	2.05952
237987	2.18962	2.57632	1.44092	2.26718	1.3057	0.352932	3.19594	3.55904	3.58116	0.492685	2.0918	1.19255
22222	-0.462004	-0.645446	-0.521937	-0.292192	-0.434615	-0.490605	-0.751133	-0.864419	-0.996022	-0.346354	-0.457747	-0.479666
16598	0.379613	0.425029	0.488397	0.265147	0.478456	0.454381	0.889721	1.32628	1.07454	0.4156	0.537495	0.683388
71363	-0.321637	-0.199563	-0.0288346	-0.143938	-0.140099	-0.331625	0.314637	0.216276	-0.0832295	-0.0313437	-0.554677	-0.811697
320119	0.204008	0.293404	0.202652	0.211872	0.17323	0.109743	0.115091	0.112412	0.0294452	0.171745	0.089318	0.127638
19216	1.53896	1.81654	1.6849	1.78915	1.78257	1.19284	-0.0811832	0.091384	0.325058	1.56743	1.47717	1.00525
13640	0.151127	0.306959	0.116916	-0.0484766	-0.0525408	0.0306164	-0.0661355	0.0308498	-0.0919107	0.0822083	-0.255566	0.160983
226412	-0.248529	-0.188862	-0.431547	-0.190945	-0.231276	0.119906	-0.714495	-1.03646	-0.501012	0.0249876	-0.321899	-0.454835
98999	-0.0131218	0.0173139	-0.0332439	0.0260121	-0.036621	-0.293877	-0.449525	-0.188985	-0.0667714	-0.438263	-0.209548	-0.0766883
234594	-0.448113	-0.72945	-0.496217	-0.352036	-0.513249	-0.613288	-0.401391	-0.363578	-0.224263	-0.0513561	-0.358615	-0.984098
20649	1.17927	0.747135	1.00367	0.795488	1.04086	0.935858	0.668585	0.614527	0.836526	0.780271	0.452804	0.570346
74111	-0.618454	-0.65258	-0.767386	-0.634262	-0.590195	-0.726534	-0.312133	-0.320886	-0.301616	-0.557596	-0.50609	-0.742169
74269	-0.880911	-0.355801	-0.151559	-0.019549	-0.51349	-0.099326	-0.372978	0.00791051	-0.637108	0.208805	-0.378441	-0.283853
224826	-0.64916	-0.49777	-0.545453	-0.782516	-0.616969	-0.554487	-0.395222	-0.227217	-0.421887	-0.542772	-0.628108	-0.550613
53328	0.0664194	-0.156402	0.0470047	-0.108502	0.0683047	0.0146458	1.28227	1.16188	1.23025	0.046606	-0.0231138	-0.053808
54390	-1.64269	-1.66705	-1.70068	-1.72917	-1.72267	-1.56499	-1.06059	-0.777122	-0.55536	-1.37736	-1.30808	-1.30761
666173	-0.757359	-0.671842	-0.494012	-0.673314	-0.651703	-0.742505	-0.688979	-0.486558	-0.280727	-0.584279	-0.758082	-0.577573
100048313	1.40736	1.41632	1.198	1.03848	1.22357	1.13912	1.43209	1.49769	1.43345	1.32283	1.18051	1.1436
107338	-0.0109286	0.22777	-0.512384	0.149678	0.160929	0.361643	0.0463951	0.107314	0.360506	0.323692	0.208277	0.481663
258506	-0.477356	-0.139637	-0.224312	-0.31895	-0.260221	-0.250321	-0.0628643	-0.177452	0.269354	-0.0624741	-0.955613	-0.465477
12465	-0.339274	-0.486355	-0.618206	-0.4889	-0.369248	-0.319647	-0.473078	-0.521604	-0.566845	-0.427886	-0.460684	-0.376793
67098	-0.330263	-0.528446	0.267321	-0.313165	-0.0648424	-0.100778	0.213228	0.164025	0.185797	0.101554	0.0526023	0.0127046
12578	-2.47101	-2.24135	-2.70526	-2.57386	-2.44123	-2.13267	-2.13879	-2.1178	-2.0601	-2.59812	-2.57845	-2.35763
12751	0.0706597	0.0525768	-0.0371632	-0.0189704	-0.0945111	-0.0893081	0.00321473	-0.139156	-0.0642394	-0.340128	-0.229816	-0.156554
100044576	-0.196622	-0.0147896	-0.251502	-0.258925	-0.237686	-0.155223	0.125559	0.111774	0.287711	-0.290764	-0.335116	-0.160642
108679	-0.397486	-0.705373	-0.175075	-0.123689	-0.309841	-0.386796	-0.28858	-0.329807	-0.277562	-0.420686	-0.557614	-0.36757
67693	0.315863	0.326489	0.2969	0.217658	0.481185	0.618624	0.345713	0.303572	0.168073	0.431907	0.3274	0.279464
229801	1.95055	1.23511	0.775305	1.58087	1.42944	1.41643	0.338762	0.455864	0.343415	1.44513	0.329623	0.888188
245219	-0.108162	-0.0033751	-0.170876	-0.196731	-0.117667	-0.19515	-0.666735	-0.863145	-1.04793	0.0427764	-0.327314	-0.279292
69700	1.94836	1.76731	2.61525	2.01696	2.02499	1.86215	2.17532	2.4331	2.38485	1.90319	2.15686	2.11415
16975	-2.39644	-1.78405	-2.26948	-2.53264	-2.16698	-2.28366	0.124251	0.706921	0.613708	-1.69333	-2.39781	-2.06816
100044175	0.812265	0.276282	0.477496	0.791872	0.318679	0.621528	0.072565	0.196522	0.526353	0.852168	1.36923	0.764031
17227	1.76778	1.6018	1.23295	1.5599	1.4374	1.55944	0.268839	1.27148	1.2695	2.10406	1.67324	1.77786
70415	0.972371	1.02822	1.20429	1.00087	1.28906	0.967073	0.527267	0.164662	0.273152	1.34655	0.734782	0.970486
100041386	-0.190043	-0.31585	-0.117755	-0.445509	-0.344162	-0.232172	-0.297085	-0.817903	-0.710537	-0.59095	-0.491526	-0.362604
99377	0.153564	0.228484	-0.0692529	-0.0166562	-0.199437	-0.0637552	0.380716	0.354548	0.237704	-0.204043	0.0254326	0.185815
66641	0.0395158	0.0166005	0.0666995	-0.0658332	0.13126	-0.122556	0.0921924	-0.025224	-0.241481	0.163592	0.147329	0.110611
18503	-0.0292056	0.797787	-0.0229556	0.181498	-0.140099	0.117729	-0.0002434	0.0614355	-0.107555	0.280702	-0.0156891	0.160983
378702	0.524952	0.471044	0.330226	0.328065	0.478022	0.278644	0.410811	0.37239	0.4371	0.466496	0.79059	0.812275
330222	2.78618	2.89379	2.69021	2.65508	2.71895	2.55179	2.14457	1.96858	1.82781	2.54581	2.60141	2.13614
229603	0.628034	0.618007	0.921362	0.590824	0.600893	0.335509	0.244632	0.0295754	0.0262802	0.424495	0.600402	0.497271
22144	-2.104	-1.87251	-1.92188	-1.93528	-1.89851	-1.71816	-0.601965	-0.235501	-0.233884	-1.58342	-1.83239	-1.77161
14792	-0.0672216	-0.624044	-0.527816	-0.561942	-0.515661	-0.493509	-0.427935	-0.146292	0.0876816	-0.656917	-0.461419	-0.547775
22343	-0.450306	-0.363648	-0.302209	-0.496132	-0.292061	-0.690963	-0.761601	-0.798787	-0.844101	-0.316706	-0.552474	-0.391692
213742	0.908036	1.05033	0.653866	-2.8245	0.514058	-5.43059	-5.27526	-3.00183	-5.35426	-5.86756	-3.05796	-2.76281
22774	0.288082	0.150009	-0.29927	-0.530122	0.11534	0.0719947	0.923741	0.937588	0.655486	-0.229986	0.277303	0.366729
56484	-0.562893	-0.0033751	-0.41391	0.00978044	0.243422	0.134425	0.194909	0.769367	0.568955	0.045	0.217823	0.25889
24058	-0.565817	-0.554843	-0.825442	-0.93294	-0.831886	-0.378811	-1.0547	-0.892456	-0.882081	-0.87483	-0.708883	-0.743588
56736	-0.488597	-0.524968	-0.0479414	-0.3704	-0.355161	-0.360905	-0.559438	-0.606352	-0.515571	-0.282907	-0.262419	-0.163243
56878	-0.525242	-0.084704	-0.352034	-0.431406	-0.310996	-0.368043	-0.85843	-0.407545	-0.357953	-0.202376	-0.414213	-0.368753
381678	-0.192967	-0.181728	-0.435222	-0.702965	-0.430997	-0.245965	-0.838802	-0.812806	-0.484554	-0.397497	-0.726507	-1.09974
74954	-3.99677	-3.54333	-3.95822	-3.70132	-3.28642	-3.59688	-3.18101	-3.20677	-2.97859	-3.8048	-3.80549	-3.6148
75744	1.4059	1.34283	1.35641	1.34213	1.35708	1.29883	0.816445	0.635554	0.319361	1.65785	1.2316	1.3011
75863	0.227403	0.632989	0.119611	0.242246	0.730422	0.189032	-0.282037	0.264703	0.151615	0.302938	0.245727	-0.0213499
65969	-0.638925	-0.930811	-0.654215	-0.843987	-0.895565	-0.825987	-1.34257	-1.20405	-1.78538	-0.931903	-1.0944	-1.03305
66204	-0.664366	-1.00287	-0.560151	-0.710197	-0.560285	-0.779164	-0.755058	-0.895642	-0.713792	-0.461092	-0.607443	-0.532167
66381	0.530069	0.813482	0.578909	0.54454	0.595828	0.591764	0.258371	0.469882	0.220612	0.603865	0.437384	0.33906
11699	2.44864	3.5208	2.30955	3.26446	2.88168	5.14846	-0.8846	0.0142825	-0.30668	3.26245	2.03756	2.85554
12229	-1.77648	-1.57788	-1.54415	-1.46015	-1.73208	-0.956655	-0.961147	-1.2958	-1.38912	-1.33067	-1.38886	-1.36437
246317	0.883253	0.575202	1.09259	0.801996	1.05026	0.983769	0.838035	0.140449	0.381396	0.957912	1.30681	1.17481
68991	-0.241949	-0.448544	-0.219168	-0.201793	-0.130692	-0.28081	-0.337648	-0.454698	-0.457968	-0.270752	-0.249201	-0.288819
68991	0.154945	0.25274	0.18428	0.142952	0.272367	0.106356	0.125559	0.0805515	0.109837	0.32295	0.157691	0.356087
215707	-0.941591	-1.12129	-1.13409	-1.00164	-1.10686	-1.33196	0.0522833	-0.303235	-0.0522123	-1.2395	-0.932849	-1.51123
66244	-0.189312	0.127893	0.118729	-0.0038196	-0.129727	-0.128121	0.211266	0.150134	0.184531	0.0218375	0.122362	0.127638
77446	-0.517566	-0.212405	0.101974	-0.456356	-0.15023	-0.379537	-1.64745	-0.780308	-0.591532	-0.0535797	-0.625905	-0.24838
214230	-0.0789189	-0.0219238	-0.338218	0.0809746	-0.025043	0.0102902	-0.181937	0.0646215	-0.10222	-0.098793	0.0291042	-0.0603706
16362	-0.62635	-0.528874	-0.397008	-0.268327	-0.65315	-0.586792	-0.629279	-1.03519	-0.965637	-0.305588	-0.553575	-0.615884
12576	0.216437	0.393996	0.433403	0.292689	0.326096	0.366206	0.380061	0.589756	0.576994	0.293747	0.42435	0.45298
16541	-2.49075	-2.54598	-3.12487	-1.94468	-2.75962	-1.81979	-2.19964	-2.35292	-2.50067	-2.81752	-2.0189	-2.2129
12816	0.138821	0.0331279	0.938264	0.618306	0.836795	0.602653	0.0607885	-0.358481	-0.437712	0.762482	0.35514	0.25818
16149	0.105313	0.105777	0.0365695	0.569852	0.221713	1.18485	0.321179	0.132802	0.108571	-0.0795217	0.222229	0.181558
64661	3.79203	3.69067	3.57794	3.65631	3.69005	3.4955	3.68728	3.29332	3.5097	3.24773	3.68783	3.44795
71810	-0.590673	0.138594	-0.667443	-0.837478	-0.881816	-0.402767	-0.559438	-0.262263	0.0819846	-0.760685	-0.558348	-0.446321
73711	-0.341961	-0.193143	-0.301033	-0.702242	-0.44547	-0.392483	-0.0020193	0.0168313	0.0927456	-0.353488	-0.316024	-0.505916
20354	-0.111086	0.147155	0.323172	-0.0181026	0.0798827	-0.0194732	0.122288	0.354548	0.574462	0.145062	0.0790376	0.151051
381598	-0.0251324	0.295545	0.0284858	-0.126581	-0.11622	-0.14143	-0.0766035	0.041045	-0.006636	-0.156607	-0.11115	-0.116418
28081	-0.157144	-0.152478	-0.215494	-0.175035	-0.208844	-0.410752	0.124905	-0.174329	0.0667925	-0.151418	-0.344662	-0.182399
108958	0.247142	0.224203	0.293042	0.153294	0.185532	-0.349774	0.538389	0.623448	0.932742	-0.33746	-0.21836	-0.110743
227801	0.130169	0.267722	0.129899	0.120027	0.13126	0.166366	0.177899	-0.0282684	-0.0914586	0.105778	0.159812	-0.171757
227801	-0.314326	-0.156759	-0.219168	-0.237953	-0.403499	-0.283714	-0.142028	-0.443229	-0.0977886	-0.184031	-0.249936	-0.183818
76295	-0.0416339	0.163563	0.360834	-0.0340128	0.314337	0.153118	0.164814	0.603694	0.775757	0.412318	0.445053	0.40236
56047	-1.68948	-1.94926	-1.83306	-1.94353	-2.11477	-0.463745	-3.01352	-2.38988	-2.49371	-2.17514	-2.04656	-1.02596
258769	0.0190456	0.276282	-0.0596994	-0.189499	-0.0684606	-0.197327	-0.100156	0.154467	-0.0477813	-0.422698	-0.0795746	-0.0628143
83675	0.0229099	-0.234521	0.397517	0.200921	0.125592	0.0308583	-0.0582846	-0.234226	-0.418089	0.435613	0.118415	0.130274
77219	-0.0450804	-0.133012	0.100014	0.14561	0.102605	0.05675	0.179571	0.135351	0.0902136	0.141504	0.180832	0.227572
67179	0.275654	0.880971	-0.002379	0.289254	-0.42159	0.275257	1.02057	1.27021	0.965839	-0.625046	0.733313	0.107064
12984	-1.21501	-1.19691	-0.756363	-1.25838	-0.753734	-0.727986	-1.78877	-1.52647	-1.72714	-1.00207	-1.28752	-1.12126
93891	0.208395	0.281276	0.145331	0.339877	0.325192	0.352206	0.13341	-0.0118428	-0.0110671	0.411894	0.321362	0.317776
69288	0.00807942	0.92192	-0.0641087	0.443293	0.0798827	0.534415	-0.445599	-0.0704653	-0.0167641	0.171004	0.408011	0.446899
69372	0.383854	0.787086	0.416011	0.280013	0.471943	0.319103	0.67251	0.867496	0.728915	0.383581	0.360427	0.539839
242443	-0.451038	-0.589086	0.00203025	-0.127304	-0.228237	-0.0172954	-0.0214286	0.20385	0.0084154	-0.264822	-0.45995	-0.451997
208715	0.920465	0.789761	0.674321	0.798174	0.574119	0.676263	0.723542	0.733471	0.720306	0.924212	0.880176	0.827984
170765	1.62596	2.01915	1.95166	2.00756	2.09084	1.9166	1.39676	1.04782	0.640294	2.04254	1.85388	2.13969
226049	0.634613	1.63034	0.905195	0.738355	0.772393	0.808819	0.453991	-0.102963	-0.191473	0.546793	0.483646	0.839235
217303	-0.457617	0.348337	0.124755	-0.196731	0.209412	0.0894171	0.0293846	0.0722679	-0.002838	-0.202561	-0.101604	-0.252636
239650	1.05352	-0.496343	0.518649	0.799827	0.808574	0.518445	0.072565	0.357734	-0.0965226	0.529004	0.728173	0.881803
70375	-1.90661	-2.05301	-2.16071	-1.80511	-1.88693	-1.5962	-1.52576	-1.30218	-1.53091	-1.97774	-2.31189	-2.32286
27643	0.706259	0.182112	0.830237	0.69858	0.859228	0.673795	0.930938	0.569923	0.648523	1.01004	0.706143	0.886414
72240	-1.3276	-1.0792	-1.16936	-1.08698	-1.11482	-0.794772	-0.834222	-1.11548	-1.4252	-0.86223	-1.30662	-1.11322
18021	0.280772	0.436087	-0.0244253	0.3406	0.302759	0.436414	0.444832	0.563551	0.836526	0.184346	0.358078	0.368857
18208	0.902188	0.628708	1.16093	0.9705	1.11756	0.805189	0.6342	0.520079	0.542179	0.939629	0.589387	0.528488
258734	-0.221479	-0.195759	-0.280898	-0.230721	-0.0872748	-0.259032	0.0810702	0.00918491	-0.214894	-0.183197	-0.0803089	-0.149561
21672	-0.0547933	0.244464	0.248949	0.0874833	0.149532	0.0596538	0.229584	0.220736	0.256694	0.127718	0.147329	0.175173
69277	-0.972296	-0.768153	-1.10616	-0.963314	-0.953744	-1.17444	-0.946033	-1.08107	-1.19478	-1.43073	-0.91596	-1.38211
22064	0.178421	0.683641	0.373143	0.473667	0.275985	0.517719	0.200143	0.395329	0.134524	-0.145489	0.0592111	0.0247656
73149	-0.698873	-0.790269	-0.431547	-0.223489	-0.608285	-0.403493	-1.24116	-2.13819	-2.03668	-0.558338	-0.761754	-0.503078
105439	-0.014584	-0.501337	-0.0935038	0.346386	-0.0351738	-0.298958	-0.673278	-0.64777	-1.20555	-0.210714	-0.100135	-0.27463
381522	0.270536	0.410404	0.230577	0.0968848	0.541556	-0.0093101	0.508294	-0.173692	0.30227	0.324433	0.0530429	0.244701
243676	-0.241949	-0.248931	0.0505322	-0.309549	-0.0098469	0.0603797	0.0910148	0.220736	0.0921126	0.0674831	0.193591	0.488757
75221	0.695293	0.60117	0.834646	0.44257	0.485403	0.689765	1.03889	1.27658	1.22836	0.409671	0.593793	0.519974
279499	-0.217677	0.152862	-0.2662	-0.0207242	-0.0049624	0.0066605	-0.117167	0.181229	0.164275	-0.0261553	-0.586252	0.173754
216551	0.777905	0.891244	0.69208	0.517059	0.64214	0.718803	0.515491	1.3849	1.33723	0.749882	0.87063	0.961973
66084	-0.315057	-0.454251	-0.392599	-0.710992	-0.457771	-0.624994	-0.0785663	-2.7397	-2.61082	-0.200338	-0.584049	-0.298752
245902	-0.427643	-0.198707	-0.625555	-0.157678	-0.504807	-0.0971482	-0.144645	-0.217659	-0.211096	-0.338942	-0.158146	-0.125799
21766	0.0351293	-0.365075	0.0358346	-0.0723419	0.032847	-0.0623033	0.139298	-0.101688	0.0921126	-0.473099	-0.108213	-0.295914
11819	0.769132	1.23796	0.349627	1.15781	0.854886	1.04693	0.130793	0.608792	0.812471	0.962607	0.879442	0.700888
234373	0.321712	0.132887	0.625941	0.723892	0.616089	0.544578	1.15927	0.74579	0.840324	0.737282	0.429306	0.629942
234373	0.4767	0.161423	0.594341	0.519952	0.548069	0.321716	0.805323	0.541886	0.715622	0.503803	0.330908	0.372405
234373	0.487667	-0.129649	0.523793	0.569852	0.770945	0.488681	1.11086	0.833724	0.780821	0.80399	0.569561	0.710821
211232	-0.506031	-0.160326	-0.26473	-0.598825	-0.277588	-0.633342	-0.220538	-0.314832	-0.257939	-0.148453	-1.00775	-1.52826
14573	-0.620648	-1.73697	-0.86586	-0.930047	-0.535923	-0.910196	-0.93514	-0.64777	-0.665593	-0.96081	-1.08706	-0.935854
195208	0.0629103	-0.62547	0.131369	-0.0849978	-0.0949935	-0.0910296	-0.134759	-0.099458	-0.263636	-0.0402381	-0.252261	-0.0316765
330260	0.174034	0.678647	0.436343	0.216935	0.405225	0.339139	0.0908839	0.041045	-0.211729	0.603865	0.153938	0.287269
100046825	-1.14337	-0.611202	-0.777675	-0.8288	-0.747221	-0.908018	-0.772069	-0.271184	-0.274397	-0.805157	-0.882182	-0.832272
70920	-0.517566	-0.497056	0.00864415	-1.07469	0.195663	-0.16466	-0.282037	-0.355358	-0.49848	-0.539807	-0.564223	-0.338482
16000	0.255915	0.0273017	0.2416	0.369528	0.417092	1.02515	0.124905	-0.097865	-0.0787985	0.433389	0.248665	0.317066
71116	-0.317104	-0.149523	-0.167433	-0.483838	-0.283739	-0.232414	-0.329143	-0.469354	-0.408594	-0.168466	-0.302929	-0.632202
268396	-0.0292056	-0.0768565	0.0358346	0.00142357	0.0994206	0.0131939	-0.219884	-0.357843	-0.0490473	-0.298917	-0.020095	0.037536
19221	1.36862	1.62178	1.54527	1.50855	1.57489	1.48975	1.49228	1.31736	1.30558	1.29392	1.34794	1.18829
319634	0.178421	0.0965026	0.556128	0.160526	0.355584	0.0262607	0.527267	2.42864	2.24623	0.221406	0.415207	0.0793946
19274	0.284281	-0.338679	0.531142	0.394116	0.622602	0.405925	0.440907	0.407436	0.0389403	0.682433	0.607745	0.344736
19361	-0.741276	-0.67969	-0.973152	-1.21715	-0.821031	-0.88624	-0.953296	-1.61568	-1.59105	-0.748826	-1.11129	-1.31968
71765	0.0738764	0.0354346	0.0328951	0.00657631	0.0626191	0.054987	0.166973	0.0503198	0.0633901	-0.0561739	0.241321	0.170916
71957	-0.901382	-1.00857	-0.853367	-0.855558	-0.581672	-0.364383	-0.693559	-0.269272	-0.308579	-0.539529	-0.791126	-0.564566
20316	-0.494537	0.115765	-0.0468391	0.216211	-0.144682	-0.0615774	-0.150533	0.267889	0.271886	-0.001325	0.0766878	0.122672
20403	-0.28289	-0.0418993	-0.086155	0.00503952	-0.315217	-0.256128	-0.452796	0.344353	0.544078	-0.0231905	0.13558	-0.188075
27049	-0.13375	0.168557	-0.300739	-0.203963	0.100868	0.0821578	0.247903	0.152237	-0.0211951	0.00793997	-0.26095	0.0389549
20658	0.568085	0.701476	0.811865	0.343493	0.621155	0.388502	0.554091	0.557816	0.599782	0.55717	0.270694	0.450446
74121	-1.09731	-0.753171	-1.14658	-0.694287	-0.0105705	-0.113119	0.210611	-0.0609073	0.541546	-0.503192	-0.429109	-0.390273
242669	-0.807073	-0.77172	-0.909953	-0.828077	-0.891947	-0.804935	-0.736085	-0.481461	-0.507975	-1.40998	-1.08852	-0.813825
74277	-0.595791	-0.278752	-0.326775	-0.307586	-0.394092	-0.3561	-0.569252	-0.091493	-0.174382	-0.28602	-0.258013	-0.236724
215512	0.059986	0.0822344	0.206326	0.245139	0.0654102	0.14241	-0.474386	-0.462982	-0.459867	0.0976253	0.120159	-0.134865
209225	0.62584	0.643066	0.444426	0.482346	0.399906	0.53378	0.418008	0.481352	0.508629	0.269007	0.529999	0.450535
76206	-0.0172646	-0.0201912	-0.244154	-0.384761	0.00100751	0.045861	0.162197	0.282545	0.0395733	-0.0503678	0.0143129	0.140409
74742	-0.585881	-0.415727	-0.284572	-0.496132	-0.502016	-0.351679	-0.522146	-0.336179	-0.0154981	-0.224797	-1.11643	-0.530038
258308	0.0460955	0.020881	0.114466	0.368082	0.382358	-0.339611	0.156381	0.239215	0.347756	-0.241845	0.287583	-0.284562
76892	-0.419601	-0.374349	-0.302797	-0.731531	-0.468264	-1.62161	-0.85843	-0.847852	-0.853596	-0.348331	-0.480511	-0.67004
22138	3.86062	3.95107	5.26596	4.57995	3.84093	4.10239	4.63267	4.15864	4.13195	4.05786	3.98964	4.15434
59079	-0.6901	-0.270191	-0.637313	-0.944511	-1.38248	-0.871721	-1.16847	-0.756668	-0.756746	-1.6064	-0.861621	-1.08676
12589	-0.358922	-0.252356	-0.361275	-0.333253	-0.307981	-0.433982	-0.731506	-0.7185	-0.857394	-0.402685	-0.505792	-0.441355
67229	-0.131556	-0.0460609	0.0509521	0.0889297	0.0554242	0.0422313	0.0346913	0.0576123	-0.188941	-0.0067605	-0.0088704	-0.0021055
12865	1.65049	0.31552	1.70411	1.88968	1.66115	1.90849	2.43898	2.13935	2.08164	1.96738	1.74447	1.99035
67528	0.147715	0.857	0.524161	0.757158	0.648653	0.14483	1.79716	1.92653	1.774	0.990031	0.366522	0.525366
13138	1.05133	0.683641	1.02498	1.0609	1.11105	1.21244	1.22731	0.941411	1.43788	0.868474	0.861818	0.969777
218030	-0.203202	-0.0889845	-0.0244253	-0.794087	0.0248872	-0.127637	0.554746	0.717754	0.595984	-0.0602505	0.0731631	0.168788
207921	0.202546	0.369026	0.391515	0.273343	0.682663	0.659276	0.365014	0.368567	0.507363	0.79213	0.303738	0.937141
403174	-0.0621041	-0.0533139	-0.428608	-0.169973	-0.687161	-0.388248	-0.329143	-0.197906	-0.339596	-0.4983	-0.11629	-0.311522
56307	-0.910886	-1.36243	-0.918771	-1.17882	-1.07937	-0.886966	-1.13779	-1.64117	-1.43026	-0.765874	-1.0709	-0.635749
109065	-0.607397	-0.397178	-0.536145	-0.64069	-0.546488	-0.214659	-0.758984	-0.808345	-0.98526	-0.582138	-0.60767	-0.612336
17069	-0.241827	-0.374349	-0.244276	-0.260372	-0.433891	-0.277997	-1.06255	-0.237412	-0.291488	-0.424498	-0.421949	-0.367491
14164	0.99211	0.244179	1.16461	1.25978	0.623326	1.47015	1.50995	1.12429	1.45814	1.42586	1.13792	1.23725
320011	-0.400593	-0.697525	-0.595425	-0.803488	-0.474415	-0.86664	-0.591497	-0.711491	-0.356687	-0.679153	-0.743396	-0.880515
17122	0.600984	0.565928	0.81407	0.357957	0.459786	0.355835	0.489321	0.248136	0.280115	0.331104	0.395528	0.446189
72162	-0.353073	-0.519291	-0.255177	-0.162018	-0.305086	-0.0572218	-0.466535	-0.483372	-0.570579	-0.222079	-0.399002	-0.205102
18092	0.192311	1.22155	0.706778	0.257433	0.459063	0.590312	-0.01445	0.150644	0.509262	0.698739	0.372764	0.601563
241452	-0.197353	0.244179	-0.849693	0.402795	0.577014	0.0364238	0.212574	0.688442	0.597883	0.454884	0.0856465	0.206389
215008	-0.182001	0.450355	-0.0339787	0.0795282	-0.242854	0.156929	0.126213	0.223922	0.332021	-0.0721097	0.126034	-0.0156741
237928	0.139673	-0.115381	0.0439183	0.117857	0.188427	0.0480388	0.413755	1.03763	0.916284	0.245124	-0.0905893	0.226727
28135	0.19816	0.450865	0.23822	0.346747	0.0914607	0.852375	1.14161	0.895533	0.800444	0.159392	0.513018	0.45494
57296	-0.119859	-0.105987	0.146801	-0.25314	-0.280483	-0.249595	-0.15773	-0.331718	-0.295286	-0.318188	-0.0397117	-0.376793
100978	-0.843626	-0.636885	-0.647748	-0.703688	-0.836228	-0.655392	-1.02134	-0.491019	-0.531397	-0.71273	-0.777689	-0.823048
72194	0.0889549	0.142161	0.138088	0.198855	0.222644	0.254204	0.249212	0.397241	0.301004	0.19324	0.212263	0.390851
75547	0.0592549	-0.0062287	-0.0868899	-2.28e-05	-0.26384	0.0879652	-0.348116	-0.366127	-0.144631	-0.249998	-0.0663569	0.3121
64337	-0.461273	-0.268764	-0.367613	-0.426706	0.0878426	0.204841	-1.59446	-1.21934	-1.07641	-0.132147	0.658413	-0.0021942
243819	-0.478087	0.127893	-0.308823	0.00648591	-0.737091	-0.16829	0.178553	0.0461426	0.188329	-0.687307	-0.107479	-0.198007
11363	-0.0192142	0.13574	0.36212	0.398745	0.496209	0.50925	1.42097	1.34221	1.36129	-0.0467352	0.5993	1.73884
11464	1.84735	2.11475	2.08296	2.39446	1.76738	2.46105	1.09167	1.86663	1.15382	1.97305	2.0426	2.06307
208666	0.877331	0.0865149	0.232782	0.707981	0.412027	0.224441	0.289775	0.536788	0.695999	0.113932	0.128971	0.581698
258094	-0.238294	-0.258777	-0.23901	-0.13092	-0.352845	-0.718549	-0.159039	-0.373773	-0.778268	-0.172913	-0.152272	-0.0213499
11787	-0.565086	-0.869457	-0.781349	-0.505533	-0.48806	-0.800579	-0.555513	-0.687277	-0.7175	-0.737708	-0.698288	-0.612336
68292	-1.17846	-1.3503	-0.934295	-1.10731	-1.04029	-0.953752	-0.828989	-0.625468	-0.559882	-1.03419	-0.977129	-1.00609
14403	-0.0825743	-0.298728	0.210001	-0.0831898	0.0118619	-0.131267	0.618208	-0.16286	-0.0243601	-0.279646	0.128971	0.496562
14789	0.281503	0.145728	0.214961	0.235738	0.267922	0.130795	-0.154459	-0.387155	-0.326936	-0.21442	0.132643	-0.186656
68774	-0.461273	-0.69378	-0.227986	-0.053539	-0.250091	-0.0789998	-0.534577	-1.25439	-1.03843	-0.0787805	-0.55688	-0.245542
69207	0.0555995	0.25702	-0.390394	-0.0853594	-0.0568825	-0.0289103	0.0562088	0.203532	0.501666	-0.179584	0.161281	0.132605
71063	-0.549002	-0.588373	-0.768856	0.278406	-0.20016	0.0335201	-0.682437	-0.726783	-0.0889266	0.375576	-0.403408	-0.32713
18717	0.00954157	0.168557	0.2416	-0.0998232	0.39466	0.226619	0.437635	0.573746	0.544078	0.103555	0.0188238	0.289397
16495	0.999421	0.126466	1.27484	1.28003	1.33103	0.975784	1.50798	1.1759	1.19037	1.36508	1.19006	1.23086
16553	0.412366	-0.0711492	0.388576	0.795488	0.42071	0.675973	0.678399	0.561639	0.339617	0.525298	0.593059	0.385175
27402	0.364845	-0.101826	0.315088	0.174989	0.382358	0.339865	0.348003	-0.081935	-0.183877	0.451178	0.325768	0.512879
270035	0.221554	0.334782	0.254093	0.138107	0.335323	0.283242	0.508294	0.361558	0.564334	0.634255	0.293458	0.716497
226432	-0.526339	-0.809531	-0.306618	-0.655877	-0.411459	-0.492057	-0.247362	-0.591697	-0.415557	-0.531654	-0.618562	-0.754939
545512	-0.283621	-0.0533139	-0.332339	-0.333414	-0.215357	-0.299684	-0.41027	-0.334267	-0.464298	-0.218126	-0.362286	-0.282434
74778	-0.0387096	0.0865149	0.0409788	-0.11501	-0.0590534	0.139507	0.380716	0.131528	0.221878	-0.0120725	0.104004	0.0985502
71868	-0.245605	-0.0197835	-0.59763	-0.112117	-0.330413	-0.0318141	-0.186881	0.0587592	0.0686915	-0.569456	-0.0648882	-0.179561
20111	0.399937	0.884823	0.175094	0.409303	0.516229	0.636046	1.0016	0.796767	1.01377	0.290338	0.519535	0.585718
26930	-0.612606	0.288411	-0.642457	-0.476606	-1.04391	-0.710563	-0.640565	-0.510772	-0.563047	-1.04753	-0.0472647	-0.759906
211666	0.201815	0.212313	0.219064	-0.0549854	0.215924	0.399391	1.58126	1.46519	1.44294	0.00108386	0.23765	0.136861
100039354	-0.288007	0.431806	-0.164052	0.0838674	0.130537	0.524978	2.19495	1.74747	1.5879	-0.0246729	0.587918	0.273789
140630	-0.501482	-0.624757	-0.747545	-0.428875	-0.224764	-0.743957	-0.325872	0.272987	0.32759	-0.330789	-0.233046	-0.532167
74302	-0.0401717	0.273429	0.0747831	-0.104162	-0.0091233	0.108291	0.539698	0.673149	0.847287	-0.174396	0.010012	-0.0986818
258739	-0.162262	-0.230686	0.0652297	-0.835309	-0.0807622	-0.110759	-0.136794	-0.0736513	-0.0680374	0.0401822	-0.125653	-0.254765
54698	-0.795375	-1.13057	-0.970213	-1.03057	-1.27113	-0.0035026	-0.556821	-0.342551	-0.210463	-0.59058	-0.789658	-0.517977
404314	-0.219286	-0.778854	-0.0849302	0.394116	-0.406394	0.0654612	-0.0052905	0.135634	0.0167851	-0.282611	-0.402674	0.0240561
76804	-0.119128	-0.134643	-0.108936	-0.104162	-0.145165	-0.20749	0.00190623	0.00345009	-0.0230941	-0.0384263	-0.0854491	-0.018512
67027	0.169648	-0.0233506	0.154885	0.298334	0.238357	0.299212	0.384641	0.22902	0.235172	0.0702008	0.178905	0.276829
12526	-1.911	-0.68183	-0.610858	1.57292	-0.497571	1.03894	-0.624209	-0.289663	-1.17326	0.0138696	0.219292	-0.284562
67268	-0.275579	-0.47494	0.190894	-0.23958	0.0444251	0.190322	0.0640598	0.0225662	-0.216793	0.037588	0.314019	0.102807
74548	1.94397	2.48144	1.81277	2.01613	1.8231	1.14638	2.8734	3.10089	3.1875	1.12864	1.67617	1.60688
217664	-0.0409028	-0.250929	0.0666995	-0.0231649	0.102315	-0.14506	-0.459993	-0.366127	-0.392056	-0.114062	-0.153006	-0.347823
94043	-0.382316	-0.729807	-0.40301	-0.512765	-0.224185	-0.450243	-0.551878	-0.625752	-0.658314	-0.17946	-0.35788	-0.380518
94280	-0.501064	-0.357703	-0.461047	-0.224935	-0.752468	-0.313477	-0.635331	-0.421564	-0.351069	-0.670259	-0.42764	-0.43627
67590	-1.79988	-1.56289	-1.46772	-1.71833	-1.9716	-2.01652	-1.04685	-1.40668	-1.40051	-1.43666	-1.6466	-1.51975
381802	-0.88676	-0.634031	-1.08191	-1.00598	-1.41947	-1.25574	-1.25229	-0.779671	-1.02767	-1.76724	-1.06062	-1.31542
67767	0.0440241	-0.237374	0.00717439	-0.216112	-0.0246812	-0.0407975	0.05948	0.111137	0.164275	0.0205404	-0.0995479	0.0602389
16783	-0.244727	-0.137211	-0.325725	-0.245908	-0.261488	-0.200775	0.00256048	0.103703	0.211117	-0.294915	-0.305866	-0.292366
13924	-3.10851	-2.79353	-2.57665	-2.59773	-3.46154	-2.93628	-2.86501	-2.91494	-2.36394	-2.93018	-3.22465	-2.44489
69769	-0.44592	-0.17174	-0.434487	0.00214676	-0.14227	-0.0187472	-0.229043	-0.70257	-0.668758	-0.0669213	-0.220563	-0.266116
16069	-4.55092	-4.51214	-4.7247	-4.48381	-4.74453	-4.71918	-3.57814	-3.66556	-3.28813	-4.86768	-4.68741	-4.58536
16069	-2.6215	-2.34265	-2.9654	-2.72211	-2.81173	-2.80997	-2.67484	-2.5256	-2.28418	-2.9413	-2.70393	-2.75564
17101	0.022701	-0.164606	-0.44404	-0.292192	-0.34778	-0.285165	0.26426	0.524044	0.344048	-0.351542	-0.520164	-0.608789
259013	0.117741	0.00233225	-0.155968	0.229952	0.0400833	0.341317	-0.163619	0.144909	0.290243	-0.0569892	0.0151522	-0.188784
252967	-1.38024	-0.972902	-1.57943	-1.46955	-1.43322	-0.221283	-1.03573	-0.904563	-1.0397	-1.38626	-1.24053	-1.37076
252967	-1.45846	-1.12795	-1.50006	-1.69808	-1.63945	-0.550132	-1.00498	-0.985487	-1.12072	-1.58194	-1.31763	-1.17636
17527	-0.281427	-0.666135	-0.450654	-0.330521	-0.367318	-0.375181	-0.652996	-0.656691	-0.573175	-0.370073	-0.471699	-0.158277
72248	-0.585556	0.190673	-0.305148	0.269728	-0.156019	-0.580621	-0.12427	-0.041154	-0.172483	-0.632458	-0.241858	-0.0461812
224023	-0.273508	-0.379968	-0.442693	-0.368127	-0.316251	-0.312509	-0.429243	-0.340639	-0.537094	-0.323377	-0.426759	-0.588658
20878	-0.467852	-0.763694	-0.599834	-0.566282	-0.590195	-0.293877	-1.03442	-1.65901	-1.3229	-0.68916	-0.841549	-0.964055
18596	0.273461	0.115527	0.310679	0.434434	0.254518	0.328492	0.249866	0.261517	0.4288	0.180393	0.351469	0.252032
258603	-0.220017	-0.0383322	-0.230926	-0.188776	-0.494676	-0.592962	0.0640598	0.0174685	0.231374	-0.0469089	-0.0839804	-0.4747
99946	0.40213	1.10955	0.905195	0.369528	-0.26601	-0.0020507	0.582224	1.01469	0.926412	0.273216	0.691457	0.184396
21887	0.339258	0.258447	0.116671	0.259603	0.431565	0.209196	0.599889	1.1536	1.12707	0.193981	0.248665	0.284431
21958	-0.733965	-0.0411859	-0.0251602	-0.0860826	-0.380343	-0.308395	-0.080529	0.134714	-0.32567	-0.122511	-0.224235	-0.0362487
73078	-0.852399	-1.33318	-0.668913	-0.84688	-0.737091	-0.789981	-0.609161	-0.931962	-1.00172	-0.576867	-0.88578	-0.868454
100036529	1.37154	0.958305	1.51441	1.47746	1.37445	1.28068	1.37975	1.34667	1.2005	1.55631	1.5462	1.44654
74996	0.0984407	-0.103966	0.18428	0.162213	0.0849481	0.159954	0.0397072	-0.149638	-0.235863	0.251795	0.137049	0.177443
23833	-0.64916	-0.671842	-1.22007	-0.449687	-0.936269	-0.174985	-0.452796	-1.09254	-1.12959	-0.599196	-0.47023	-0.766291
23993	3.3067	3.74133	2.51237	3.37909	1.51121	-0.0114879	4.16783	4.45494	3.99411	-0.0394969	3.58686	2.72429
26388	-2.46881	-2.08739	-2.26779	-2.41693	-2.26278	-2.03031	-4.09565	-3.98926	-3.84454	-2.21855	-2.2436	-2.21502
108652	-0.302263	-0.183155	-0.591261	-0.585808	-0.534475	-0.532709	-0.893105	-0.655417	-0.557877	-0.0467352	-0.323661	-0.442774
75705	-1.25522	-0.992164	-0.886436	-0.827595	-1.04825	-1.30728	-0.552242	-0.481461	-0.282626	-1.07273	-1.07971	-1.11393
110886	-0.220748	-0.0905897	-0.153764	-0.124412	-0.146612	-0.0586737	0.177245	-0.130999	-0.0351212	-0.103346	-0.4974	0.197876
72667	-0.024088	0.21588	0.033777	0.123643	-0.0462091	-0.214024	0.210757	0.37685	0.186747	-0.0403863	-0.171915	0.0233466
72667	-0.260957	-0.161039	-0.546923	-0.214087	-0.64519	-0.25395	-0.509061	-0.031596	0.0737555	-1.28842	-0.490057	-0.380341
78243	-0.582266	-0.650369	-0.471966	-0.365234	-0.552928	-0.552471	-0.444727	-0.497072	-0.404163	-0.744824	-0.764691	-0.655614
68092	0.107993	-0.0939784	0.12402	-0.0077369	0.139944	-0.335255	-0.501865	-0.395438	-0.448473	0.0576004	-0.26095	-0.209359
11931	0.717956	0.911933	1.29982	0.846473	0.720472	1.37795	1.43013	1.45818	1.56005	1.80313	0.77091	1.57282
57908	-0.238294	0.276282	-0.316172	0.0789497	0.237633	0.551838	-0.274186	0.411259	0.709925	0.328139	0.385982	0.177301
320273	-0.496364	0.0265883	-0.281632	-0.211918	-0.181346	0.278886	-0.080529	-0.018852	-0.150961	0.19917	-0.124368	0.260309
68473	0.386047	0.0736735	-0.904808	-0.756481	-0.17411	-0.269195	-0.161656	0.183141	0.0315552	-0.519795	-0.225703	-0.163322
100044104	0.690906	1.32143	0.820275	1.06668	1.05895	0.859634	0.8943	1.78188	1.76514	0.489721	0.872833	0.884641
14841	-0.858248	-0.639025	-1.02386	-1.1781	-0.931746	-0.827439	-0.940211	-1.62779	-1.75753	-0.774027	-1.40208	-1.08626
80907	-0.132288	-0.398605	-0.0317741	-0.0716188	0.160205	-0.260484	-0.286617	-0.215747	-0.14653	0.29775	-0.0582794	0.0907461
15563	0.20547	-0.209551	-0.008258	-0.167803	-0.386132	-0.222009	0.0457408	0.0773655	-0.691546	-0.133629	0.199465	-0.134865
241694	-1.07903	-0.47494	-1.81165	-1.16147	-1.13002	-1.15629	-1.28631	-1.05749	-0.60799	-2.6085	-0.95855	-1.61836
216987	-0.0950026	-0.242368	-0.171401	-0.138876	0.0632393	0.0255348	-0.680474	-0.696835	-0.637108	0.201393	-0.0883863	-0.158987
239555	0.113355	0.174265	0.269526	-0.0947609	0.0111383	-0.118926	-0.0223009	0.0333986	-0.0528453	0.048706	0.023964	0.0304413
207932	-0.198816	-0.219539	-0.285307	-0.156232	-0.085104	-0.134897	0.153692	0.394692	0.22441	-0.0772981	0.0202924	-0.336354
192176	0.374106	0.28413	0.314476	0.561794	0.429876	0.0763503	-0.314096	0.193336	0.283913	0.269337	0.392905	0.187943
237500	0.0278185	-0.164606	0.253358	0.0730195	0.033028	-0.0005989	-0.244745	-0.143106	0.00918907	0.369646	0.199465	0.267404
225341	1.55431	1.42345	1.08786	0.966884	0.885097	0.960249	0.764759	1.1982	1.04162	0.993885	1.56309	1.20225
71843	-0.10341	0.110771	0.139452	-0.130197	0.10521	-0.169742	-0.0059447	-0.250794	-0.0876606	-0.270752	-0.259727	-0.165372
233744	1.85186	1.58111	1.89434	2.31491	1.80066	1.89191	1.89007	1.61876	1.76957	1.90138	2.21369	2.00844
224045	0.0384192	0.0187407	-0.0129822	-0.175035	0.0885662	-0.0564959	0.326413	0.320777	0.382662	-0.026367	4.62e-05	-0.211487
26893	0.341695	0.0519857	0.434138	0.139553	0.516229	-0.0383475	0.486704	0.228382	0.247199	0.238083	0.167302	0.0500699
27057	-0.432761	-1.37455	-0.308333	-0.440446	-0.25588	-0.664829	-0.597385	-0.753546	-0.604825	-0.155865	-0.665559	-0.741602
74127	2.35338	3.14777	2.42198	2.35975	2.66467	2.2527	1.21881	2.34134	2.22484	2.62809	2.50742	2.49034
29813	0.0899602	0.416825	0.147536	0.117857	0.00100751	0.0734465	0.367267	0.542027	0.866277	-0.122511	-0.0920579	0.120632
29813	0.187925	0.484599	0.168113	0.117857	0.125471	0.162011	0.520725	0.562913	1.08909	-0.116582	0.0195581	0.244701
74342	0.541035	0.444648	0.405233	-0.322566	0.369514	0.230884	0.177245	0.238648	0.272519	-0.124735	0.243524	0.33567
68817	-0.0036178	0.331215	-0.0303044	0.130875	0.195663	0.56926	0.329684	0.455226	0.516225	0.223629	0.223698	0.203551
76485	-0.0387096	0.0230212	0.157089	0.0773587	0.00245476	0.0966765	-0.499248	-0.676444	-0.761177	0.149509	0.0070747	-0.0284445
229615	-0.132288	-0.867317	-0.158173	-0.284237	-0.355016	-0.464562	0.05948	-0.33535	0.00982208	-0.511642	-0.663355	-0.625816
72322	-0.108162	0.215642	-0.168461	-0.141045	0.105933	-0.362841	-0.147917	0.0384962	0.0680585	-0.121029	-0.172833	-0.285981
76709	-0.0909294	-0.24219	-0.0664052	-0.150157	-0.133876	-0.414382	-0.402419	-0.228491	-0.225022	-0.348578	-0.243572	-0.27392
56220	0.059986	-0.550776	0.338604	0.0556629	0.00245476	-0.204587	-0.668698	-1.40477	-1.47331	0.451178	-0.293995	0.0503064
56220	-0.184194	-0.556983	0.295981	-0.107778	-0.0431337	-0.342514	-0.676091	-1.06896	-0.872586	0.333327	-0.317493	-0.271083
66664	0.504847	0.752723	0.415766	0.410027	0.683145	0.451659	0.425205	0.918472	0.913752	0.535428	0.277303	0.413554
66743	-0.0650284	0.00019201	0.0115837	-0.37102	-0.22404	-0.253224	0.257717	0.0117337	0.181999	-0.484217	-0.328508	-0.277468
56404	-0.361115	-0.390044	-0.41832	-0.33703	-0.357911	-0.378811	-0.172778	-0.11507	-0.258572	-0.211455	-0.336585	-0.30088
224836	-0.206126	-0.392185	-0.20888	0.0245657	-0.664004	-0.115297	-0.261101	-0.381147	-0.304702	-0.118064	-0.149335	-0.233906
67454	-0.618454	-0.606922	-0.710906	-0.343539	-0.62927	-0.530532	-1.44791	-1.63352	-1.75373	-0.626422	-0.749166	-0.934435
225995	-1.27569	-1.51438	-1.52211	-1.68072	-1.50992	-1.4728	-1.60754	-1.8712	-1.93793	-1.39534	-1.64024	-1.82695
67640	-0.109624	-0.375063	0.0402439	-0.45708	0.0234399	-0.114882	0.423896	0.0238406	-0.007269	0.219182	-0.615625	-0.256893
67723	0.0972709	0.150009	-0.196387	-0.225659	-0.155296	0.0219051	-0.354005	-0.889907	-0.766874	-0.328565	0.0474621	-0.14125
67808	0.785946	0.926677	0.775856	0.829478	0.856333	0.57289	0.731393	1.06496	1.05554	0.885522	0.645929	0.790991
108797	0.801299	0.455349	0.724415	0.709428	0.632733	0.428429	0.00583172	-0.436219	-0.533929	0.497874	0.538352	0.646259
69707	-0.502944	-0.656861	-0.14568	0.108456	0.324468	1.19937	0.414737	0.124518	-0.0952566	1.02339	0.438118	0.873289
100048006	-0.682058	-0.147484	-0.589546	-0.364511	-0.361529	-0.255506	0.317908	0.149369	0.224199	-0.255927	-0.13318	-0.0539854
170745	-0.0365163	0.817762	0.15268	0.6306	0.434459	0.559823	0.0974264	-0.037968	-0.0332222	0.348892	0.560014	0.378081
70078	0.180614	0.512422	0.565681	0.233568	0.611024	0.486504	0.134064	-0.331081	-0.455436	0.947783	0.258211	0.545515
100048871	0.0804561	-0.387904	0.0387741	0.2907	0.259342	-0.0073397	0.0899026	0.0607186	0.0388348	-0.113154	0.420494	0.0354076
270109	-0.0043489	-0.0183567	-0.159643	0.488131	-0.124903	0.641854	-0.554204	0.0748167	0.0440043	-0.17736	0.328705	0.39227
268903	0.409685	0.932622	0.490724	0.425455	0.616451	0.491767	0.537081	0.73687	0.635863	0.459702	1.10267	1.18333
20850	0.0936156	0.252026	-0.0647386	-0.03112	-0.160904	0.0699206	0.287813	0.363469	0.461576	0.117638	0.131908	0.265985
233887	0.209126	0.397563	0.149741	0.3905	0.273814	0.403021	0.36436	0.225834	0.228209	0.0798365	0.23765	0.520684
109151	-0.0277434	0.0679662	-0.163317	-0.261818	0.219542	-0.104408	-0.149225	-0.244422	-0.276296	-0.108429	-0.515024	-0.062499
72665	0.828349	0.591611	0.642843	0.677607	0.636351	0.874153	0.539044	0.313767	0.264923	0.472673	0.654007	0.733524
78651	0.315132	0.193527	0.251889	0.264665	0.282498	0.242589	0.357163	0.0633471	-0.0977886	0.289596	0.283177	0.226254
66964	0.17111	-0.0297713	0.0522469	0.0137178	-0.0214249	-0.132356	-0.289888	-0.160311	-0.159823	0.152474	-0.280043	-0.112162
21848	-0.398985	-0.293836	-0.256059	-0.121519	-0.547501	-0.327028	-0.50121	-0.485284	-0.625714	-0.110652	-0.298401	-0.083783
252912	-0.168842	0.166417	-0.11555	-0.453464	-0.315217	-0.0180213	0.0581716	0.0257522	0.114901	0.164333	-0.171364	-0.992611
54645	-0.461273	-0.340819	-0.518263	0.184391	0.0248872	-0.17192	0.378753	0.303572	0.554206	-0.14623	-0.0326599	-0.0759789
22601	0.293931	0.610873	0.66489	0.636386	0.717397	0.464	1.47593	1.38044	1.52523	0.524557	0.817025	0.834268
22788	0.171841	-0.107622	-0.349976	-0.0674604	-0.134455	0.0762466	0.270802	-0.0986615	-0.107917	-0.0259082	-0.112619	0.326289
23893	0.493515	1.29504	0.850262	1.49481	0.905298	1.12097	-0.433169	0.934402	0.799178	1.16377	1.0053	0.678895
56698	-0.61553	-0.55841	-0.255912	-0.129474	-0.140823	-0.377359	-0.33634	-0.372499	-0.486453	-0.339127	-0.242593	-0.346996
24082	-0.428374	-0.786702	-0.291186	0.00214676	0.00173114	-0.116749	0.0470493	0.666777	0.644092	0.497133	0.267757	0.59163
57319	0.822318	1.65673	-0.0295983	0.654672	0.958606	0.502474	0.783078	1.44134	0.688403	0.819555	1.85021	1.02895
75497	2.82931	1.30288	0.440017	1.26122	0.470641	1.43022	3.72392	2.96644	2.93557	0.410412	1.93025	0.828593
101100	-1.11632	-0.581239	-1.33177	-1.15134	-1.00556	-0.84341	-0.887217	-0.861233	-0.877861	-1.52042	-1.03418	-1.32393
75654	0.628765	0.838451	0.357711	1.19541	0.639969	1.31334	0.775227	1.09498	1.41952	1.27613	1.10561	0.970486
59308	4.10379	4.25784	4.04562	4.12795	3.97178	4.0385	3.83449	3.50806	3.29258	4.21092	3.72492	3.8339
109754	-0.173959	-0.234164	-0.02663	-0.118144	-0.151677	-0.14506	-0.402419	-0.382694	-0.385964	-0.176619	-0.332179	-0.116773
15463	-0.328217	-0.406453	-0.314702	-0.193838	-0.262392	-0.259032	-0.819829	-0.743988	-0.849165	-0.0765569	-0.163287	-0.0603706
66220	-0.440071	-0.290167	-0.441836	-0.718152	-0.516385	-0.307669	-0.102119	-0.40181	-0.382007	-0.716213	-0.645732	-0.785447
11605	-0.967179	-2.00378	-1.06795	-0.715982	-1.68576	-1.05702	-1.14703	-1.30366	-1.19542	-1.35365	-1.2036	-0.989064
68038	-0.334796	-0.10682	-0.409501	-0.408626	-0.316664	-0.32364	-0.0458539	-0.41774	-0.366815	-0.0328261	-0.214689	-0.118547
78639	-0.039197	-0.475654	0.103443	0.498256	-0.119114	0.204115	0.180516	0.034673	-0.0977886	0.439319	0.0540709	0.0838879
68655	2.92545	3.41316	3.60293	3.66222	2.77988	2.74731	1.75137	1.62768	1.53536	3.73692	3.45983	3.48129
81489	0.432105	0.187819	0.201672	0.184481	0.209864	0.147038	-0.0360401	0.236029	0.121231	0.143765	0.0678393	0.0225583
70821	0.0351293	0.228199	0.259727	-0.134536	-0.0100881	0.449481	-0.515604	-0.0812978	-0.481389	0.0739068	-0.0680703	-0.0901682
73442	-0.0825743	0.0344358	0.141657	0.697857	0.255724	0.532238	0.17749	0.109226	-0.0414513	0.823261	0.80087	0.675348
16173	1.22825	0.562361	-0.191977	0.318905	0.0625157	-0.0782739	0.0333101	1.83286	1.75058	-0.389344	1.28405	0.501528
71083	0.324088	0.463196	0.282753	0.0990544	-0.0713551	-0.0250387	0.0543278	0.0042289	-0.0199291	-0.0120725	0.0601552	0.384466
224224	0.141867	0.16713	0.158559	0.216418	0.253966	0.445125	0.510257	-0.409457	-0.253508	-0.440487	-0.0098146	0.0935839
227618	1.8928	2.08851	2.75856	1.76449	1.71329	1.81714	1.63164	0.381311	0.836526	2.57175	2.52798	1.87094
195434	-0.140329	-0.0647285	0.334195	-0.034736	-0.211377	0.117729	-0.157076	-0.0818439	-0.38264	0.307385	-0.0832461	0.163821
381686	-0.245605	-0.0889845	-0.327195	0.082421	-0.119114	0.113373	-0.413541	0.335432	0.299738	0.0724244	-0.149335	-0.403753
71934	0.0931769	0.835915	0.0750281	-0.0658332	0.294593	-0.390426	0.373228	1.26009	0.969377	0.054318	0.567148	0.189788
100043866	0.022701	-0.234521	0.291572	-0.296531	0.23112	0.14241	0.453337	0.127704	0.121864	0.037588	0.279506	0.324161
74241	-0.0138529	0.0494175	0.5113	0.22366	0.244869	0.149579	0.105277	0.335432	0.380763	0.383729	0.396996	0.526359
22746	0.0592549	0.205655	0.0556763	0.0231193	0.0545558	-0.126186	-0.185863	-0.462345	-0.747251	-0.101017	-0.0289068	0.0871987
22746	0.674823	0.46605	0.545105	0.9206	0.820875	0.591764	0.158926	0.0104593	-0.288956	0.775824	0.525502	0.599434
432572	-1.30323	-1.29655	-1.49261	-1.27067	-1.4817	-1.30305	-1.46606	-1.62842	-1.72588	-1.30942	-1.38131	-1.49397
54368	-0.910886	0.206368	-0.648336	-0.347155	-1.19659	0.964895	-0.955165	-0.980262	-0.830069	0.480085	-0.276371	0.829302
67201	-0.490516	-0.361202	-0.247387	-0.41311	-0.515903	-0.565013	-0.639257	-0.6637	-0.536698	-0.517201	-0.442938	-0.477183
85305	-0.502944	-0.826494	-0.423923	-0.706581	-0.334393	-0.693141	-0.408307	-0.302407	-0.346559	-0.43191	-0.601673	-0.375374
677553	-0.0409028	-0.440697	0.334195	0.0737427	0.0560031	-0.066659	0.493246	0.202257	0.207319	0.710598	0.354406	0.461798
258710	-0.333334	0.0636857	-0.496217	0.152571	0.324468	-0.288795	0.370248	0.625359	1.0739	-0.140208	-0.333648	-0.0269242
14114	0.362652	0.628423	1.07128	0.292689	0.479807	0.757277	0.654846	0.0155569	0.152248	0.354328	0.360281	0.282302
17151	-0.748586	-0.665421	-0.523407	-0.723937	-0.598788	-0.611927	-0.539157	-0.410731	-0.462399	-0.682118	-0.546599	-0.607725
17199	-0.353658	-0.187578	0.0233417	-0.455633	-0.292785	-0.542872	-0.107447	0.0716307	-0.370613	-0.0810041	-0.0781059	-0.227096
239114	3.63203	3.76701	3.44769	3.52481	3.45704	3.53543	3.20183	2.99894	2.88936	3.49381	3.45175	3.42524
17828	-0.355997	-0.703946	-0.302944	-0.292192	-0.362253	-0.41293	-0.182592	-0.423475	-0.510507	-0.447157	-0.346131	-0.42078
171257	0.256646	0.105064	0.283488	0.129428	0.155863	0.249849	0.0535918	0.151918	-0.304781	0.761741	0.937453	0.282302
18146	-0.234273	-0.088717	-0.105629	-0.329798	-0.198472	-0.176638	-0.3253	-0.491019	-0.358523	-0.165607	-0.244184	-0.244974
78887	-1.18533	-0.95578	-1.30025	-1.30032	-1.35666	-1.4561	-1.38837	-1.30536	-1.19035	-1.40679	-1.1983	-1.25795
224617	-0.774174	-0.488495	-0.468291	-0.412965	-0.423037	-0.603125	-0.437748	0.0518774	-0.007902	-0.656917	-0.784518	-0.236319
21681	-0.123515	0.276282	0.121815	-0.122965	-0.13612	-0.2087	0.125559	-0.208738	-0.295919	-0.0368286	-0.13811	-0.312941
257880	0.316594	0.0102987	-0.137596	0.151847	-0.0467518	-0.055044	-0.21465	0.285093	-0.250343	0.050312	0.0430562	0.379499
232943	1.53906	1.93425	1.58254	1.57328	1.45173	1.46475	1.46873	1.73027	1.78754	1.56085	1.65551	1.69272
22324	-1.97607	-2.23421	-1.83296	-1.75882	-2.13658	-1.66735	-1.73316	-1.89286	-1.91768	-2.05779	-1.95942	-1.90144
73533	-0.223672	-0.580526	-0.512384	0.173543	-0.139376	0.197581	0.0267677	0.312493	-0.002838	0.480085	0.170827	0.036117
246729	-1.73408	-2.22066	-2.27315	-1.03708	-2.49188	-1.71018	-2.3403	-2.69191	-2.58423	-1.48039	-1.70462	-2.14479
56538	0.641193	1.14022	0.938264	0.731124	0.798443	0.713721	1.12185	1.68248	1.4632	0.775824	0.955076	0.615752
102193	0.0263564	0.0743869	-0.0200161	-0.0144866	-0.265287	0.0301626	0.172011	0.234117	0.357974	-0.218867	-0.0281725	-0.0646274
100046777	-0.217824	-0.0518871	-0.347771	-0.0766811	-0.188582	0.103936	0.459225	0.151281	-0.0699364	-0.503489	-0.807281	-0.0816546
59045	-0.323099	-0.185295	-0.469656	-0.460696	-0.502998	-0.409881	-0.469807	-0.320886	-0.272498	-0.267787	-0.367793	-0.331299
63872	-0.350149	0.43894	-0.459473	-0.208302	-0.332584	-0.725808	1.34246	0.790395	0.677641	-0.928197	0.192612	0.0533216
63872	-0.524145	0.369026	-0.62482	-0.47516	-0.302192	-0.559569	1.25806	0.708833	0.821333	-0.852594	-0.169161	-0.0575327
107392	-0.089885	0.134313	-0.224312	-0.0896985	-0.211738	-0.374455	0.259026	0.239215	0.442797	-0.394532	-0.238187	-0.186656
64930	-0.951095	-0.840921	-0.748279	-0.684885	-0.662557	-0.759927	-0.451487	-0.746537	-0.685217	-0.73252	-0.827842	-0.676898
66174	0.0358604	0.187106	-0.175075	0.0187802	-0.136481	0.224441	0.404923	0.230931	0.297206	-0.120288	0.606276	0.0084478
209773	0.406639	0.253453	0.623002	0.61128	0.582803	0.593942	0.226967	0.0760911	-0.0566434	0.230671	0.229572	0.434128
52276	-0.874917	-0.682645	-0.849876	-0.862893	-0.605511	0.0874813	-0.51037	-1.07406	-1.08717	-0.558461	-0.960753	-1.00751
11732	-1.87883	-2.16787	-2.07326	-1.75593	-2.15612	-2.30472	-1.1921	-0.771388	-0.75548	-1.81912	-1.25285	-1.8986
319475	0.441121	0.943561	0.796727	0.568044	0.679527	0.626972	1.14749	1.46328	1.33027	0.704298	0.855454	1.06626
99382	0.840046	0.735007	0.996319	1.07392	1.01408	0.948924	0.74644	1.22369	1.2062	1.24056	1.1504	1.24079
12176	-1.90881	-2.90982	-2.06623	-1.91841	-2.6547	-2.06225	-1.94906	-1.96869	-1.92337	-1.8925	-1.95878	-1.90774
14595	0.0734195	0.00019201	-0.0490437	-0.239296	0.0901582	-0.102714	0.454646	0.110146	0.0305705	-0.0489843	0.578372	-0.087229
228852	-1.64562	-2.47107	-2.0762	-1.57947	-1.47085	-1.85754	-1.24574	-1.76332	-1.69399	-1.40849	-2.07618	-1.6815
68731	0.358997	0.261301	0.217349	0.372421	0.168647	0.215367	0.548857	0.579481	0.589021	0.37854	0.179849	0.24612
15139	2.20789	4.07164	2.34114	2.51017	3.20016	4.74339	0.681016	-0.185799	-0.209197	2.76298	2.4663	2.03469
68953	0.00241356	-0.0140762	-0.0810109	-0.180097	-0.0778677	-0.172646	-0.0026735	0.162751	0.162376	0.144403	0.168624	0.261728
623818	-0.289469	-0.115381	-0.434487	-0.548925	-0.37166	-0.23072	-0.195677	-0.206189	-0.192739	-0.367108	-0.360818	-0.534295
18671	-0.328217	-0.211691	-0.32646	0.961822	0.46051	0.315183	0.399035	0.148732	0.0585634	-0.0876749	0.1253	0.615752
231134	1.37066	0.17914	1.30901	1.71949	1.69755	1.79119	2.18382	2.10813	1.9772	2.11048	1.51371	1.47492
71217	0.136749	-0.184701	-0.137806	0.377483	0.0468854	0.090869	0.111275	-0.0656408	-0.0039232	0.115414	-0.316024	0.134733
18973	-1.41825	-1.2119	-1.10249	-1.36886	-1.25416	-1.14508	-1.33852	-2.12353	-2.08352	-1.04531	-1.22217	-1.43319
208624	-0.38451	-0.332258	-0.735787	-0.452741	-0.465008	-0.243787	-0.226426	-0.128451	-0.0294242	-0.401944	-0.340991	-0.680445
16624	-0.102313	-0.572678	-0.0641087	-0.135983	-0.333308	-0.0579477	0.226313	0.354548	0.187696	0.148768	-0.0994011	0.17872
19109	-2.85994	-2.37975	-2.42086	-2.92172	-2.82041	-2.98274	-2.96576	-2.92895	-2.77033	-2.66854	-2.60342	-2.57614
19172	-0.363308	-0.368336	-0.201531	-0.372466	-0.228671	-0.292606	-0.151188	-0.236966	-0.220212	-0.237398	-0.309415	-0.23419
97863	0.223991	0.542385	0.431199	0.207694	0.438439	0.187176	-0.370361	-0.0462517	-0.0154981	0.32384	0.227369	0.627104
68628	-0.103776	0.0672528	-0.388925	-0.98067	-0.0141886	-0.201683	-0.0432369	-0.306867	-0.101587	-0.318188	-0.495932	-0.215744
381798	-0.27631	-0.13607	0.353302	-0.156232	-0.334031	-0.433256	-0.26241	-0.519693	-0.255316	0.246607	-0.0795746	-0.195879
19290	0.11795	0.172124	0.103117	0.139372	0.0993402	0.0621945	0.0320016	0.0155569	0.0104551	0.108743	0.0341526	0.197876
19362	-1.17554	-1.35957	-1.27298	-1.5679	-1.28053	-1.42416	-1.50221	-2.16176	-1.97465	-1.39219	-1.66056	-1.85958
108112	-0.571666	-0.235234	-0.505127	-0.364728	-0.600597	-0.423275	-0.146608	0.0232034	0.0838836	-0.598084	-0.284612	-0.513721
52685	1.52872	0.824896	1.84363	1.6098	2.15958	1.97322	2.74386	2.75361	2.57602	1.98546	2.09473	2.03114
20195	-0.175502	0.0306309	0.133757	0.315289	-0.0974056	-0.125771	0.37679	0.171742	0.0691662	-0.119423	0.804542	-0.0478366
20338	-1.82035	-2.03731	-1.72714	-1.56212	-1.85147	-1.67315	-1.75344	-1.45638	-1.35937	-1.79763	-1.94988	-1.88725
74019	-0.0109286	-0.148911	-0.17581	-0.368127	-0.229105	-0.245239	-0.6844	-0.652868	-0.789662	-0.0565445	-0.105276	-0.119256
20673	-0.453962	-0.384337	-0.406562	-0.249524	-0.244302	-0.208216	-0.189134	-0.0500749	-0.279461	-0.0246729	-0.465825	-0.266826
240880	0.519103	0.663665	0.315088	0.266835	0.445314	0.363095	0.072565	0.0110965	-0.116146	0.163592	0.293458	0.414263
194908	1.60548	1.1709	1.13889	0.997258	1.17835	1.31843	0.616245	0.748976	0.330122	1.39992	1.35381	1.1592
77987	-0.774905	-0.596221	-1.01798	-0.668252	-0.684266	-0.706208	-0.770106	-0.974655	-0.570643	-0.756979	-0.786721	-1.209
245386	2.88268	2.13187	3.18772	3.29773	2.87091	3.32055	2.3926	2.08583	1.60056	3.11802	2.70789	2.87044
242050	1.36204	1.57184	0.458879	1.69297	-0.0434274	1.52459	0.222388	-0.0029219	-0.44784	0.571253	0.624634	1.26846
76487	0.579051	0.737147	0.457654	0.403518	0.541556	1.93184	0.561942	0.759809	0.531418	0.585335	0.502003	0.13899
76640	0.424063	0.411831	0.776591	0.359403	0.322297	0.392132	0.47231	0.313767	0.193393	0.42153	0.678239	0.520684
230279	-0.537305	-0.190289	-0.721089	-0.734062	-0.755181	-0.055044	-0.992551	-1.17856	-1.34607	-0.648764	-0.661153	-0.709534
100044491	-0.962792	-0.928671	-0.754893	-0.901119	-0.700599	-0.731097	-0.763564	-1.05176	-1.03907	-0.600586	-0.710352	-0.629364
66864	-0.462735	-0.185295	-0.373492	0.243693	0.396831	-0.255402	0.0743408	0.0903485	-0.229454	0.375576	0.17817	0.0525235
77045	0.404506	0.495443	0.520241	0.691348	0.419806	0.732596	0.739898	0.80505	0.566486	0.62625	0.711283	0.985385
12931	-1.21575	-0.928671	-1.30238	-1.41097	-1.65103	-1.69566	-1.60166	-1.4704	-1.38026	-1.72276	-1.42631	-1.43106
93842	1.60183	1.8836	1.53351	1.09706	1.54016	1.13839	1.62902	1.34094	1.45307	0.920358	1.25321	1.08045
67120	0.255184	0.190673	-0.56897	0.250925	-0.170854	0.121358	-0.0550133	-0.229129	-0.133237	-0.314482	0.0151522	-0.353381
13172	2.84174	1.28647	3.04516	2.22524	2.78335	1.98871	2.76414	1.39545	1.33715	2.09442	2.23132	1.59766
98432	-0.304091	-0.569111	-0.138331	-0.256756	-0.0843803	-0.145786	-0.299702	-0.185162	-0.132604	-0.235174	-0.0678255	0.124091
100041187	0.078994	0.0108932	-0.23313	-0.0569483	-0.72696	-0.115442	-0.191097	-0.0526237	-0.0939906	-0.160313	-0.056566	-0.0273803
224792	2.95579	2.97084	3.24504	3.25289	3.27686	3.19497	2.74648	3.0856	2.72794	3.06539	3.16904	3.26136
243312	-0.531456	-0.230954	-0.56603	-0.158402	-0.417248	-0.585703	-0.425972	0.160202	0.271886	-0.210714	-0.317493	-0.285981
100046378	0.228865	0.934762	-0.278693	0.176436	-0.32173	0.156203	0.135373	-0.0437029	0.155202	0.0865073	0.116488	0.0701715
13858	0.383122	0.541672	0.355506	0.264665	0.141391	0.00085302	0.838689	0.866859	0.806141	0.0991077	0.0922553	0.130476
69752	-0.875063	-0.645446	-0.812214	-0.851219	-0.957073	-1.01691	-0.997784	-1.22253	-1.24796	-1.15204	-1.03125	-1.04511
17000	0.112806	0.355329	0.43916	0.347398	0.235281	0.347705	0.814482	0.799953	0.713723	0.302567	0.488996	0.423486
14071	0.156488	0.0800942	-0.229456	-0.235783	-0.305086	0.498845	-0.21465	-0.184525	-0.311744	0.0865073	0.159078	0.0609484
170936	-0.307746	-0.386477	0.0130534	-0.0094243	0.116064	-0.259758	-0.287271	-0.324709	-0.313643	0.16211	0.0114806	-0.152601
100046320	0.17111	-0.649726	0.540695	0.535862	0.387424	-0.251772	0.0921924	-0.459796	-0.20983	0.242901	-0.355677	-0.0227688
232989	-0.304091	-0.232024	0.0733133	0.109179	-0.0720787	-0.0804517	-0.14772	-0.203003	-0.285791	-0.206902	-0.0774634	-0.237129
70363	-0.189312	-0.160326	-0.587341	-0.425982	-0.745774	-0.281536	-0.0954949	-0.014519	-0.0477813	-0.356879	-0.193393	-0.896124
72224	-0.223087	-0.202536	-0.106732	-0.0824666	-0.119838	-0.386796	-0.408307	-0.29938	-0.258572	-0.829617	-0.457747	-0.115
70556	-0.671823	-1.89178	-0.925385	-1.28369	-1.10903	-0.736697	-0.174086	-0.220845	-0.407961	-0.602068	-1.05548	-0.950043
70556	-1.20561	-1.86538	-1.24065	-1.26922	-1.07575	-0.57191	-0.748058	-0.166046	-0.332	-0.610963	-1.06943	-1.06994
320707	0.907305	0.515989	1.16755	0.760774	0.908434	1.03604	1.46742	0.177406	0.797912	1.39324	1.05347	0.968535
21415	1.33718	1.74092	1.28513	1.36681	1.4678	1.3402	1.12721	1.24536	1.15366	1.35396	1.43899	1.631
72805	0.189387	-0.0654419	0.0255463	0.257433	0.174587	0.229523	0.236781	0.214364	0.213016	-0.169207	0.180373	0.19149
73046	0.0190456	-0.143775	0.195303	0.0511791	0.141391	0.332605	0.276472	0.341804	0.367469	0.130979	0.363218	0.280883
23805	-0.158606	-0.111814	-0.0479414	-0.0940377	0.0683047	0.152573	0.342769	-0.01248	0.231374	0.0902133	-0.0707628	0.173044
23959	1.45708	1.20729	1.62905	1.37259	0.999611	1.07088	0.0365814	0.365381	0.502299	1.28132	1.37217	0.801633
26466	0.262495	-0.198137	0.69355	0.591548	0.878042	0.467629	-0.202873	-0.173692	0.0927456	0.389658	0.209012	0.0907461
101513	0.474507	0.797668	0.658276	0.527997	0.650534	0.524833	0.620825	0.979006	1.05998	0.632031	0.523299	0.641293
59025	-0.695949	-1.34388	-0.548393	-0.458526	-0.53462	-0.776624	-0.693559	-0.656691	-0.771305	-0.46297	-0.619205	-0.830143
231474	-0.571666	-0.686681	-0.377167	-0.519274	-0.301468	-0.547954	-0.535689	-0.345737	-0.361372	-0.593174	-0.822702	-0.987645
106878	-0.406117	-0.409307	-0.545453	-0.568451	-0.551843	-0.479958	-0.444291	-0.398624	-0.383273	-0.459017	-0.521633	-0.495984
100045732	0.770594	0.630135	0.69208	0.720999	0.539385	1.32714	0.328572	-0.141195	-0.223756	0.80399	0.672365	0.744875
110532	-0.68352	-0.327978	-0.757098	-0.519997	-0.619863	-0.696045	-0.261101	0.234117	0.242135	-0.487923	-0.437186	-0.74075
66075	0.289544	-0.110387	0.411908	0.430999	0.341112	0.333331	0.135373	-0.194082	-0.316808	0.807696	0.32283	0.424196
238247	0.172572	0.184252	0.252623	0.318181	0.218095	0.272353	-0.0033277	0.0563379	0.202255	0.344445	0.325033	0.510042
66148	-0.227571	-0.281606	-0.153323	-0.255206	-0.126893	-0.271554	-0.117821	-0.308779	-0.497847	-0.139241	-0.282099	-0.163687
11537	0.61195	1.43629	1.26234	2.47112	3.39915	3.07228	3.09977	3.48831	3.70277	3.09615	3.06486	4.86192
226777	0.798375	0.40113	0.57009	0.73257	0.674703	0.99974	0.632601	0.88024	1.01946	0.148027	0.677505	0.714368
14219	-0.197171	-0.512751	-0.281632	0.10267	-0.0271335	-0.0099553	-0.289692	-0.298584	-0.286677	-0.114358	-0.11474	-0.0882763
78571	-0.339183	-0.572678	-0.328665	-0.493239	-0.443299	-0.355581	0.239398	0.243675	0.00349204	0.113932	-0.233781	-0.622269
14451	-0.110209	-0.539148	0.240865	0.232845	0.103142	-0.0964223	-0.246054	-0.304318	-0.258572	-0.0316731	0.00296253	0.0432117
16625	0.196698	1.11169	0.556863	0.168481	0.618984	3.18843	0.552783	1.34476	0.526986	1.00486	0.908814	0.627104
14814	0.726729	0.994689	0.509831	0.600949	0.605235	0.742033	0.853737	1.22178	1.2676	0.268101	0.53156	1.00596
225152	3.08372	1.88931	3.00253	3.0786	3.31377	3.19134	3.10762	2.92375	3.02166	3.19214	2.8922	3.11521
80837	1.7634	1.5697	1.96048	2.12327	1.55294	1.89554	1.15404	0.992388	1.1391	1.80517	1.60137	1.60617
15247	-0.150272	-0.132027	-0.207042	-0.295808	-0.411749	-0.294167	-0.491397	-0.388429	-0.440244	-0.372111	-0.0744343	-0.218759
13874	-0.179077	0.0301553	-0.423464	0.0780818	-0.139376	-0.786061	0.234164	0.970086	0.654853	-0.285576	-0.177973	-0.0490191
15529	-0.501482	-0.59408	-0.402887	-0.347878	-0.26601	-0.48758	-1.07433	-1.10273	-1.20175	-0.383414	-0.473902	-0.467605
217682	2.5632	2.7668	2.78134	2.4798	2.3622	2.20624	2.09812	1.89658	1.9139	1.58596	2.25261	2.37027
230648	-0.0745324	0.398989	-0.32646	-0.0231649	0.0531086	0.277434	0.207994	0.0958444	0.344681	0.0578122	0.0672886	0.314938
16589	-0.0049581	-0.0097958	0.478231	0.0992955	0.0531086	0.144588	-0.0419284	0.472431	-0.0794315	-0.453087	-0.355677	0.0912528
19215	-0.209782	-1.30963	-0.721089	-0.661743	-0.577893	-0.503672	-0.547008	-0.87334	-1.06945	-0.490888	-0.443061	-0.452706
19733	2.26346	3.12066	2.18168	1.20409	2.76164	1.90913	1.11086	0.940137	0.673843	3.26774	2.28419	1.57566
19895	-0.252602	-0.0724741	-0.372757	-0.316178	-0.201711	-0.30041	0.303515	0.625359	0.34542	-0.239621	-0.168549	-0.179136
104394	-0.108162	0.0465638	-0.379371	-0.068726	-0.137205	-0.0412512	0.157486	0.0729051	0.184531	-0.0157785	-0.25581	-0.159696
102626	2.20351	2.12188	2.3044	1.97386	2.29345	2.12857	2.36897	2.21836	2.31712	2.20115	2.26436	2.3951
26992	-0.108893	-0.681117	0.262912	-0.068726	0.137049	-0.177727	0.0143369	0.0607983	0.0819846	-0.0550621	-0.101604	-0.062499
74002	-1.08927	-1.66349	-1.77343	-1.55199	-1.94555	-1.64573	-2.01579	-2.14966	-1.83855	-1.36551	-1.90802	-1.55522
100045329	-0.820963	-0.789555	-0.736522	-0.659573	-0.578376	-0.539969	-0.518221	-0.703844	-0.611788	-0.932644	-0.686707	-0.707202
620016	0.0274008	0.0722466	0.00790927	0.300282	0.110709	0.112829	-0.176049	-0.0092939	-0.0667714	0.00393748	-0.0714971	0.0928745
53318	3.95712	3.98246	3.74819	4.00429	3.87313	3.767	3.5669	3.2946	3.30461	3.88827	3.68746	3.76579
53814	-0.271192	-0.281606	-0.209614	-0.116637	-0.0702696	-0.0833555	-0.12642	-0.443866	-0.354788	-0.107687	-0.496666	-0.488889
210135	-0.233907	-0.132503	-0.426403	-0.339199	-0.486716	-0.309847	-0.209416	-0.11507	-0.0667714	-0.653211	-0.454076	-0.512302
66727	-0.369157	-0.267338	-0.233865	-0.519274	-0.379861	-0.179905	-0.27942	-0.308843	-0.290996	-0.57835	-0.382725	-0.482583
76969	-1.96291	-2.04373	-2.00786	-1.99386	-1.92528	-2.07024	-1.6697	-1.73675	-1.58282	-1.95624	-2.07691	-2.30158
12454	0.150315	0.254167	-0.0295695	0.199578	0.36282	0.531512	0.55998	0.339256	0.711191	0.21177	0.116488	0.709402
12568	-0.817308	-0.781708	-1.05031	-0.570621	-0.77689	-0.656844	-0.45803	-0.285202	-0.268067	-0.946727	-0.643529	-0.755649
12739	2.61803	3.55084	3.0672	3.07065	3.12852	2.93209	0.450066	0.271075	0.257327	3.10394	2.90542	2.92933
238037	-0.929711	-0.925817	-0.832709	-0.664636	-0.428826	-0.510931	-0.815904	-0.339365	-0.456829	-1.11646	-0.839591	-0.80744
77697	-0.287276	-0.0804236	-0.371287	-0.228551	-0.246473	-0.134897	0.49848	0.604332	0.195925	-0.153642	-0.180176	-0.323583
77574	0.310015	-0.686824	0.0123185	0.349279	0.0668574	0.00303082	-0.320638	-0.314655	-0.226921	-0.39972	-0.115556	-0.305846
13132	-1.13094	-1.32889	-1.00108	-1.228	-1.27257	-1.33342	-1.79728	-2.00437	-1.97401	-1.43221	-1.50341	-1.53535
97820	0.481087	0.759976	0.677138	0.252371	0.500671	0.565631	0.175282	0.519584	0.408615	0.615354	0.489153	0.450564
67621	1.4653	1.58183	1.87009	1.82242	1.44271	1.71914	1.01861	0.812059	0.804875	1.25597	1.54106	1.36897
13506	3.53041	3.68639	3.29061	3.13284	3.34488	3.42219	3.34708	3.04736	3.07356	3.28701	3.35409	3.36139
67789	-0.356729	-0.0925516	-0.307353	-0.245185	-0.386856	-0.519643	-0.112587	-0.375685	-0.31301	-0.499041	-0.542193	-0.297776
319278	0.573934	0.73572	0.553188	0.760774	0.532149	0.980865	0.234164	0.283819	0.130093	0.417577	0.488786	0.294363
319278	0.519103	1.00753	0.324641	0.787532	0.670361	0.476159	0.200798	0.492821	0.254162	0.603124	0.625368	0.389432
110253	-0.0299366	-0.111814	-0.400682	-0.210472	-0.285548	-0.266291	-0.490088	-0.199817	0.0667925	-0.539066	-0.374035	-0.136284
97884	-0.198085	0.0643991	0.0373044	-0.368127	-0.307257	-0.361389	0.242669	0.293377	0.118066	-0.222574	-0.136851	-0.0795262
668455	-0.771981	-1.09062	-0.833525	-0.924261	-0.883987	-0.708386	-0.336994	-0.362941	-0.321872	-0.929679	-0.641326	-0.709534
17216	-0.987649	-0.904415	-1.06281	-1.05444	-0.93464	-0.910196	-1.1234	-1.85208	-1.71195	-0.986752	-1.12083	-1.27924
17281	0.505212	0.585507	0.168847	0.796934	0.589315	0.742759	0.520071	0.804413	0.933375	0.929994	0.859615	0.6193
171247	0.00515511	0.778525	0.335665	0.219104	0.28692	0.196856	0.315945	0.366655	0.501033	0.23623	0.274366	0.278755
18223	0.199622	0.137881	0.498807	0.298655	0.181914	-0.0956964	0.609702	0.815883	1.12201	0.0272112	-0.0656226	0.0552727
78334	-0.701066	-0.0989723	-0.273549	-0.499025	-0.386856	-0.698948	-0.677857	-0.616548	-0.60166	-0.470135	-0.349068	-0.202264
319817	-0.714226	-0.18476	-0.481274	-0.223489	-0.177547	-0.134574	-0.023464	-0.0773949	0.251208	-0.242798	-0.0889738	-0.294495
72842	0.922658	0.533111	0.845669	0.903243	0.93955	1.24874	0.344732	0.136625	0.118066	1.28577	1.0006	1.25853
228875	-0.584094	-0.676123	-0.760038	-0.506257	-0.675582	-0.63434	-0.198294	-0.13992	-0.0560104	-0.709542	-0.738256	-0.803183
73340	-1.09073	-1.07777	-1.17304	-1.03997	-1.16837	-0.81292	-1.21061	-1.12918	-0.799157	-0.693236	-0.911554	-1.48427
22695	-1.30055	-0.382821	-0.490968	-0.680546	-0.401949	-0.530967	-1.03442	0.0638932	0.0401359	-0.344995	-0.322511	-0.747845
244859	4.00561	3.85452	3.36703	3.55157	3.55642	3.69018	2.80241	2.39296	2.21568	3.37695	3.93346	3.59146
22758	0.267856	0.245708	0.249072	0.22263	0.216286	0.161865	-0.0206653	-0.097865	-0.292754	0.0986841	0.0687572	0.141276
56626	-0.668168	-0.815952	-0.672312	-0.789748	-0.598788	-0.55231	-0.386455	-0.540083	-0.60799	-0.618375	-0.51584	-0.498822
217140	-0.103776	0.241325	0.0725785	-0.0795739	0.021269	0.0117421	0.25968	0.26534	0.39912	-0.28854	-0.285917	-0.0660463
26417	0.0972709	-0.243795	-0.199326	-0.180097	-0.154572	-0.245239	0.16416	0.692265	1.00364	-0.544996	-0.199268	-0.151182
75393	1.09373	1.00361	1.00734	0.833817	1.10815	1.31334	1.35555	1.2358	1.12771	1.75495	1.30608	1.294
64242	0.671898	0.813482	0.531362	1.07609	0.816534	0.597572	0.495863	0.513849	0.473814	0.394847	0.575435	0.437676
277010	-0.429836	-0.124655	-0.531491	-0.236506	-0.635059	-0.58788	-0.564672	-0.366764	-0.359219	-0.622081	-0.352006	-0.555579
67154	0.0525838	-0.0939784	-0.281632	0.0958723	0.208417	0.211789	0.100043	-0.0303216	0.19276	-0.0639565	-0.0524049	0.211198
66422	-0.879449	-0.719335	-0.647601	-0.855558	-0.723945	-0.754603	-0.652996	-0.828098	-0.744086	-0.671424	-0.779377	-0.791832
105787	-0.453962	-0.659001	-0.574114	-0.565558	-0.421108	-0.648859	-0.637294	-0.780308	-0.881448	-0.626676	-0.516768	-0.50166
14944	-0.389627	-0.221679	-0.468291	-0.123689	-0.368765	0.391406	-0.628789	-0.745262	-0.620017	-0.0891573	-0.45481	-0.42149
15460	1.00235	1.66173	1.13815	1.27496	1.5322	1.29665	2.16158	2.21709	2.18039	1.28503	1.54033	1.61681
638068	0.262495	0.519556	0.255563	-0.0419679	0.228588	0.172174	0.153983	0.186964	0.269987	0.00126916	0.312795	-0.278177
16477	-0.536939	-0.0013367	-0.5085	-0.37102	-0.220525	-0.307306	-0.233623	0.152555	0.150349	-0.18329	-0.231578	-0.174392
18805	0.601715	0.0472772	0.537021	0.785363	0.477877	0.395036	-5.65e-05	0.488361	-0.0262592	0.342963	0.537251	0.35254
16516	1.26773	0.914073	0.0924202	0.330476	0.50248	0.46037	0.711111	0.104128	0.506097	0.216217	0.683379	0.553319
215051	-0.62211	-0.0661553	-0.125104	-0.406456	-0.186412	-0.198779	-0.152496	0.0818259	-0.0636064	-0.0572857	-0.135382	-6.58e-05
20024	0.330485	0.254167	0.496603	0.274067	0.409132	0.286871	-0.0818375	-0.411368	-0.499746	0.431166	0.221495	0.229092
26912	-0.891147	-0.044753	-0.729908	-0.540143	-0.430364	-0.572636	0.218462	0.358372	0.120598	-0.722143	-0.901274	-0.903928
20466	-0.399497	-0.148911	-0.402362	-0.138876	-0.328363	-0.334408	-0.0923055	-0.218933	-0.201601	-0.437416	-0.379298	-0.428584
20716	-0.835585	0.642976	0.151945	0.401348	0.802785	2.20552	1.76903	1.9877	2.13102	0.274772	0.410948	0.45896
320634	0.152833	-0.304435	-0.319846	0.00431633	-0.270985	-0.679348	-0.333886	-0.490382	-0.166786	-0.274458	-0.167876	-0.504497
629974	-0.924045	-0.83022	-0.690224	-0.0759579	-0.93247	-0.621273	-1.33407	-1.30982	-1.39292	-0.719919	-0.968097	-1.1494
192775	-0.0438271	-0.163893	-0.166257	-0.0257865	-0.0047815	0.0451351	-0.158385	0.0276638	0.0661594	0.252536	0.348531	0.134834
20467	0.158681	0.223173	0.168323	0.218381	-0.0512383	0.126025	0.467731	0.594136	0.461154	-0.0318378	0.06582	0.104581
236915	0.526414	0.459629	0.642108	0.6805	0.470641	0.628061	-0.0105245	0.119421	0.242135	0.597195	0.357068	0.637746
258530	-0.379392	0.0872283	0.228372	-0.21915	0.30493	-0.487701	-0.0458539	0.257056	0.0781865	0.282184	-0.182379	-0.238447
54648	0.785946	1.46055	0.995584	0.684116	0.9135	0.707188	0.996363	1.46455	1.57081	0.765447	0.886785	0.998155
56016	2.5651	2.18766	2.64156	2.71773	1.86302	2.26759	2.46724	2.80523	2.79631	1.74816	2.41355	2.60448
258479	-0.211453	0.0273017	0.150475	-0.400671	0.0760234	0.00541604	-0.176049	-0.111246	-0.0470076	-0.0472795	0.264819	-0.0433434
56440	-0.128998	-0.20841	-0.13789	-0.0337235	0.0091483	-0.233987	-0.537194	-0.570032	-0.618751	-0.123994	-0.0878968	0.207808
12354	0.233983	0.0422833	-0.208145	-0.130197	-0.296403	-0.0085841	0.402306	0.46797	0.778922	-0.38712	0.0951926	-0.51443
67050	-0.37793	-0.246649	-0.275753	-0.305933	-0.139376	-0.129815	0.0300389	0.0359474	-0.00537	-0.0646977	-0.292526	-0.185237
100134861	-0.609681	-0.780994	-0.720354	-0.802765	-0.773272	-0.656118	-0.744591	-0.537534	-0.455436	-0.859265	-0.997469	-0.571897
12819	3.50117	3.35038	3.44971	3.53928	3.58513	3.63029	3.0049	2.55226	2.55703	3.56255	3.13783	3.32166
83961	0.118472	0.0237346	-0.0986479	-0.40284	0.0205454	0.0966765	-0.450833	0.440571	-0.0895596	1.36508	0.0805063	0.694503
77626	-0.369888	-0.43927	-0.524877	-0.519274	-0.510596	-0.466649	-0.419429	-0.573218	-0.384539	-0.279646	-0.328508	-0.403753
93886	-0.902113	-1.26041	-1.01137	-1.23379	-0.980229	-1.04812	-0.921238	-1.13587	-1.28024	-0.725108	-0.884385	-1.04298
93885	-0.742007	-1.239	-0.657155	-0.820122	-0.963586	-0.835424	-0.809361	-0.992497	-1.0954	-0.998611	-0.893196	-0.669803
13418	-0.0913472	-0.168173	-0.383045	-0.053539	-0.163979	-0.0492365	0.124905	0.0289382	0.188962	-0.333754	0.0283698	-0.331387
13418	-0.0701459	-0.175307	-0.0663133	-0.0513694	-0.011873	0.0252444	-0.0216467	-0.0768374	-0.0117001	0.167298	0.126768	0.0957123
269700	0.434298	0.787799	0.0169115	0.309503	0.46051	0.236056	-0.128289	-0.0800234	0.197824	0.703928	0.421229	0.518821
209032	0.162337	0.110771	0.213675	-0.0528158	0.0950789	0.124988	-0.408307	0.0646215	0.226309	0.0331408	0.0180894	0.149632
70258	0.705528	0.55594	0.855958	0.908305	0.671809	0.946021	0.249866	0.234117	0.111103	0.732834	0.939656	0.93856
70349	-0.518297	-0.663995	-0.433752	-0.628476	-0.385409	-0.650553	-0.833568	-0.740802	-0.745985	-0.356546	-0.537053	-0.418652
18125	0.0877669	-0.0654419	-0.125838	0.18873	0.250658	0.226619	0.628676	0.456501	0.497235	0.181381	-0.0964638	0.331256
18195	-0.230983	-0.584806	-0.321316	-0.205409	0.0560031	-0.61474	-0.0733323	0.0117337	0.319994	-0.29447	-0.620765	-0.164662
319196	-0.426181	-0.112527	-0.131717	0.155463	0.200728	-0.34687	-0.129816	-0.309416	-0.083953	0.0835425	-0.738256	-0.172733
18346	0.377274	-0.033481	0.0469627	0.282745	-0.0845612	-0.601673	-0.21196	-0.392252	-0.291804	0.074648	-0.0861834	-0.0711308
213435	1.06376	0.402485	0.78541	1.38344	1.06763	1.42223	1.42555	1.54866	1.36952	1.55334	1.37657	1.47161
329371	-0.101217	-0.732482	-0.0883597	0.245862	-0.0280581	-0.27355	0.225005	0.0640905	-0.225656	-0.28854	0.240587	-0.0065693
21453	-0.278503	-0.166033	0.0485725	0.0455382	-0.0004397	0.0269867	0.209957	-0.0532609	0.0629944	-0.0928634	-0.0303754	0.107773
[truncated: 25,414 more rows]

## Sheet: Multiple class SAM genes
	Row	Gene ID	Gene Name	Score(d)	Numerator(r)	Denominator(s+s0)	contrast-1	contrast-2	contrast-3	contrast-4	q-value(%)	GeneSymbol
1	8988	26570	8987	5.34041	2.1423	0.401149	-4.85801	-2.66929	11.9507	-4.42336	0	Slc7a11
2	4052	17153	4051	5.24606	2.0175	0.384574	5.30518	3.70158	-12.1299	3.12311	0	Mal
3	3184	14629	3183	5.15822	2.33978	0.453602	-2.96496	-3.80442	10.6946	-3.92523	0	Gclc
4	1748	11486	1747	4.96545	2.23046	0.449196	-3.78162	-3.27857	10.3686	-3.3084	0	Ada
5	1775	11529	1774	4.84681	2.473	0.510232	-2.39786	-3.07814	9.39338	-3.91737	0	Adh7
6	16399	76650	16398	4.728	1.69344	0.358172	-3.2755	-3.84344	11.6589	-4.53998	0	Srxn1
7	8010	239273	8009	4.46451	1.3319	0.298331	-4.86252	-4.47045	13.4649	-4.13189	0	Abcc4
8	10355	381801	10354	4.43079	1.22513	0.276504	-5.05525	-4.31775	14.9107	-5.53774	0	Tatdn2
9	3298	14870	3297	4.1728	1.25615	0.301032	-3.30717	-4.5421	12.4131	-4.56384	0	Gstp1
10	7368	230863	7367	4.09518	1.59505	0.389493	-2.82335	-3.6089	9.42235	-2.9901	0	Sh2d5
11	13793	68137	13792	4.03628	1.11269	0.275671	-6.15674	-3.14344	13.538	-4.23784	0	Kdelr1
12	5144	20197	5143	4.01275	1.51774	0.37823	3.63169	-0.637178	-8.61578	5.62126	0	S100a3
13	1851	11685	1850	3.97639	1.59434	0.400952	1.84502	5.14385	-8.63512	1.64625	0	Alox12e
14	12892	66805	12891	3.96446	2.14272	0.540481	2.82213	1.82943	-7.47819	2.82663	0	Tspan1
15	15139	72088	15138	3.85392	2.07896	0.539441	-2.87958	-1.90699	7.28354	-2.49697	0	Ush1c
16	3185	14630	3184	3.85348	1.43784	0.373127	-3.79527	-2.18945	9.13752	-3.1528	0	Gclm
17	16320	76408	16319	3.7927	1.16014	0.305888	-2.7832	-4.6884	11.0204	-3.54882	0	Abcc3
18	15845	74424	15844	3.78285	1.66285	0.439578	3.8133	3.0299	-7.80415	0.960957	0	Tmc5
19	16238	76072	16237	3.75412	1.69173	0.450634	-1.62099	-3.71188	7.72035	-2.38748	0	Rnf183
20	9574	319317	9573	3.71187	1.50061	0.404274	-2.89423	-2.47475	8.31151	-2.94253	0	Snhg11
21	3878	16975	3877	3.70648	1.53429	0.413947	-2.31718	-2.52509	8.14236	-3.3001	0	Lrp8
22	1466	108956	1465	3.684	1.73984	0.472269	2.33839	1.82465	-7.42169	3.25865	0	Apol7c
24	8071	23985	8070	3.64736	1.79586	0.492372	1.9593	2.4533	-7.21586	2.80326	0	Slc26a4
25	5506	20811	5505	3.62334	1.40915	0.388908	-3.3428	-2.63374	8.33535	-2.3588	0	Srms
26	3297	14867	3296	3.53478	1.53925	0.435458	-1.7139	-2.89344	7.48405	-2.87672	0	Gstm6
27	11778	59010	11777	3.53135	1.15218	0.326272	-3.26448	-3.30535	9.56976	-2.99994	0	Sqrdl
28	7569	233016	7568	3.50184	1.17522	0.335601	-3.0246	-2.7112	9.20192	-3.46612	0	Blvrb
29	6103	216188	6102	3.47047	1.14473	0.329849	-2.97408	-2.98215	9.29388	-3.33764	0	Aldh1l2
30	1778	11535	1777	3.45896	1.26542	0.365837	-3.36663	-2.44603	8.36713	-2.55447	0	Adm
31	6145	216643	6144	3.44756	1.92754	0.559103	2.36041	1.67793	-6.41505	2.37671	0	Gabrp
32	2878	140474	2877	3.40664	1.38451	0.406417	3.30629	2.42648	-7.54889	1.81612	0	Muc4
33	2399	12739	2398	3.40588	1.56409	0.459233	2.49424	2.37347	-7.01932	2.15161	0	Cldn3
35	11347	56277	11346	3.30166	1.07595	0.325882	2.83957	2.6823	-8.9481	3.42623	0	Tmem45a
36	4361	18104	4360	3.21766	2.44717	0.760543	-0.287717	-2.71483	5.1526	-2.15005	0	Nqo1
37	16605	77596	16604	3.19008	1.72327	0.540197	2.75235	1.93535	-5.97857	1.29087	0	Gpr110
39	4405	18190	4404	3.1677	0.959347	0.302853	-3.20361	-2.58111	9.35388	-3.56915	0	Nrxn2
40	9098	269181	9097	3.12983	1.04012	0.332326	3.48256	1.57525	-8.22417	3.16636	0	Mgat4a
41	5613	209086	5612	3.1096	1.23034	0.395658	1.87752	2.43158	-7.059	2.7499	0	Samd9l
42	3055	14302	3054	3.04798	0.90555	0.297098	2.8928	2.67648	-9.22692	3.65764	0	Frk
43	2852	13885	2851	3.04322	1.07642	0.35371	-2.39135	-2.86173	7.59953	-2.34645	0	Esd
44	15567	73652	15566	2.97963	1.10476	0.370771	-2.83681	-3.31746	6.95477	-0.800497	0	2210408F21Rik
45	14516	70152	14515	2.95536	0.879255	0.297512	-2.92879	-2.66461	8.94088	-3.34748	0	Mettl7a1
46	3791	16680	3790	2.94188	1.0399	0.353482	-1.95056	-1.91712	7.2836	-3.41592	0	Krt84
47	11089	54427	11088	2.9416	1.416	0.481371	-1.50873	-2.69622	5.85196	-1.64702	0	Dnmt3l
48	15764	74229	15763	2.93646	1.09791	0.37389	3.42765	1.36833	-6.87345	2.07748	0	Paqr8
49	15852	74442	15851	2.91692	1.06857	0.366334	2.30424	1.74679	-7.02645	2.97543	0	Sgms2
50	8914	26388	8913	2.90988	0.999568	0.343508	2.32555	2.54438	-7.4774	2.60746	0	Ifi202b
51	2875	14038	2874	2.89183	1.84265	0.637194	1.74314	1.55397	-5.1197	1.82259	0	Expi
52	7351	230770	7350	2.87646	0.91759	0.318999	-2.66152	-3.06528	7.97935	-2.25254	0	Tmem39b
54	4104	17250	4103	2.87072	0.854772	0.297755	-2.08448	-3.48253	8.6403	-3.07329	0	Abcc1
55	8895	26367	8894	2.86279	1.24449	0.434713	2.47171	1.74909	-6.08646	1.86566	0	Ceacam2
56	16154	75704	16153	2.81642	2.18139	0.774526	-0.838445	-1.77013	4.6246	-2.01602	0	2310039D24Rik
57	13390	67486	13389	2.76629	1.22753	0.443747	-1.64859	-2.56861	5.78309	-1.5659	0	Polr3g
58	3171	14609	3170	2.74397	1.0418	0.379671	-1.2352	-2.56551	6.38193	-2.58123	0	Gja1
59	1998	11898	1997	2.73924	1.03306	0.377133	-2.72092	-1.54064	6.43534	-2.17378	0	Ass1
60	11296	56078	11295	2.7292	1.25163	0.458607	2.49236	1.27606	-5.58212	1.8137	0	Car5b
63	16595	77577	16594	2.70382	1.62876	0.602394	1.3411	1.4366	-4.86674	2.08904	0	Spns3
64	2977	14160	2976	2.70255	1.09441	0.404955	1.95481	2.15024	-6.04675	1.9417	0	Lgr5
65	14273	69428	14272	2.68968	1.19507	0.444315	2.25514	1.8964	-5.63771	1.48617	0	1700016C15Rik
66	4331	18024	4330	2.68371	1.40446	0.523328	1.84387	-2.99044	3.92974	-2.78316	0	Nfe2l2
67	4653	18792	4652	2.67517	0.928348	0.347023	-3.88095	-0.851485	6.53923	-1.8068	0	Plau
68	10925	53328	10924	2.64766	0.713486	0.269478	-3.1363	-3.07796	9.30818	-3.09391	0	Pgrmc1
70	6269	217430	6268	2.64476	0.825745	0.312219	-1.88659	-2.89625	7.50826	-2.72542	0	Pqlc3
71	8478	246221	8477	2.63281	0.908728	0.345156	-2.91176	-1.67803	6.69204	-2.10225	0	Mpst
72	3380	15203	3379	2.62378	0.745226	0.284028	-2.14665	-4.07132	8.37341	-2.15545	0	Heph
73	15841	74411	15840	2.61927	0.880122	0.336018	-1.71491	-3.10542	6.82383	-2.0035	0	Ppapdc2
74	4877	19260	4876	2.6145	1.49719	0.57265	2.35784	1.55143	-4.73731	0.828043	0	Ptpn22
75	9286	27226	9285	2.59482	0.998512	0.384809	-3.20644	-1.53851	5.88446	-1.13951	0	Pla2g7
76	13819	68188	13818	2.57404	0.863149	0.335329	-2.79153	-1.43215	6.72131	-2.49763	0	Sympk
77	3139	14546	3138	2.56628	1.34656	0.524711	-1.28956	-2.27317	4.88225	-1.31952	0	Gdap10
78	12344	66102	12343	2.56074	0.798008	0.311632	3.92794	1.93368	-7.11333	1.25172	0	Cxcl16
79	3292	14862	3291	2.55986	1.82855	0.714315	-1.22674	-1.73918	4.35132	-1.3854	0	Gstm1
80	1809	11604	1808	2.55806	1.2228	0.47802	-1.55568	-1.86944	5.15186	-1.72673	0	Agrp
81	13610	67801	13609	2.55635	1.45902	0.570743	0.986817	1.63701	-4.68197	2.05815	0	Pllp
84	6575	22144	6574	2.52953	0.86835	0.343285	-2.82832	-2.16226	6.45198	-1.4614	0	Tuba3a
85	4953	19345	4952	2.49524	0.645878	0.258844	-4.31843	-2.0637	9.33055	-2.94841	0	Rab5c
86	4854	19227	4853	2.48308	0.900439	0.36263	-2.06048	-1.75366	6.06162	-2.24748	0	Pthlh
87	15898	74562	15897	2.47721	1.01349	0.409125	2.44384	1.7732	-5.45347	1.23643	0	Fer1l4
88	11025	54160	11024	2.45936	0.717199	0.291621	-3.05192	-2.42936	7.63367	-2.15239	0	Copg2
89	14228	69257	14227	2.44918	0.926663	0.378357	-2.3103	-2.13533	5.73606	-1.29043	0	Elf2
90	2351	12623	2350	2.44586	1.72508	0.705307	-1.48032	-0.83229	4.13961	-1.827	0	Ces1
91	2455	12830	2454	2.44409	0.888505	0.363532	2.22857	1.90601	-5.95513	1.82055	0	Col4a5
92	4853	19225	4852	2.4422	0.987045	0.404162	-2.03125	-1.67009	5.46873	-1.76739	0	Ptgs2
93	4287	17940	4286	2.43976	1.24081	0.508577	0.72459	1.45593	-4.63848	2.45796	0	Naip1
94	10977	53857	10976	2.43364	1.27904	0.525564	-2.66733	-1.34023	4.46934	-0.461777	0	Tuba8
95	8691	258633	8690	2.43185	1.15546	0.475137	-2.88174	-0.972084	4.71685	-0.863025	0	Olfr1153
96	6630	22270	6629	2.43018	1.19272	0.490795	4.16674	-0.676663	-3.63909	0.149012	0	Upk3a
97	2790	13710	2789	2.42456	1.05778	0.436276	2.06932	1.27614	-5.13499	1.78953	0	Elf3
98	15848	74430	15847	2.41545	0.84847	0.351268	2.4128	2.24385	-6.03954	1.3829	0	4930452B06Rik
99	4463	18383	4462	2.41481	1.1664	0.48302	2.03298	1.91266	-4.76993	0.824286	0	Tnfrsf11b
100	12098	635702	12097	2.41332	0.759773	0.314825	2.10032	2.84784	-6.77992	1.83175	0	Naaladl2
102	10697	50528	10696	2.40505	0.933438	0.388116	3.18916	0.840105	-5.34466	1.3154	0	Tmprss2
103	3349	15109	3348	2.3987	1.33491	0.556512	0.955257	1.4788	-4.43911	2.00505	0	Hal
104	8308	243197	8307	2.38558	0.811817	0.340302	-4.00765	-1.84246	5.61799	0.232124	0	Mfsd7a
105	7715	234757	7714	2.37686	0.730091	0.307167	-2.6185	-2.66395	6.86916	-1.58671	0	BC024137
107	5766	211666	5765	2.35396	0.764465	0.324757	-1.89738	-2.05423	6.4035	-2.45189	0	Mgst2
108	2219	12393	2218	2.35213	0.782744	0.332781	2.34183	2.0673	-6.23489	1.82576	0	Runx2
109	11654	57738	11653	2.34431	1.21642	0.518881	1.74608	1.42626	-4.52068	1.34834	0	Slc15a2
110	17304	99586	17303	2.33793	0.929458	0.397557	1.82213	1.76603	-5.30333	1.71517	0	Dpyd
111	1400	108114	1399	2.33379	1.11172	0.476355	-1.17896	-2.61411	4.56052	-0.767445	0	Slc22a7
112	2716	13522	2715	2.33138	0.7542	0.323499	3.76281	1.77682	-6.0555	0.515872	0	Adam28
113	7689	234564	7688	2.32777	1.98869	0.854333	-0.953565	-1.43201	3.76091	-1.37534	0	AU018778
114	11505	56615	11504	2.31246	1.07263	0.463849	-1.52189	-1.72365	4.73782	-1.49228	0	Mgst1
115	6381	218311	6380	2.30101	0.784735	0.341039	3.09304	1.68017	-5.81654	1.04333	0	Zfp455
117	2093	12124	2092	2.29309	0.709242	0.309295	1.11171	3.70092	-6.38995	1.57731	0	Bik
118	2114	12182	2113	2.275	1.09137	0.479725	0.567493	-0.184291	-3.89906	3.51586	0	Bst1
119	3195	14664	3194	2.27443	0.878858	0.386408	-1.61136	-1.65175	5.26661	-2.0035	0	Slc6a9
120	10943	53415	10942	2.27031	0.994993	0.438264	-1.3289	-1.89733	4.80379	-1.57756	0	Htatip2
121	2749	13615	2748	2.2677	1.2531	0.552585	1.29156	2.04634	-4.18881	0.850914	0	Edn2
122	13918	68441	13917	2.26048	0.96474	0.426784	-1.2618	-2.15418	4.84395	-1.42797	0	Rraga
123	3408	15275	3407	2.25606	0.934422	0.414183	-1.1974	-1.482	4.92463	-2.24523	0	Hk1
124	4587	18669	4586	2.25483	0.540304	0.239621	-3.55776	-3.88595	10.0338	-2.5901	0	Abcb1b
125	9875	320589	9874	2.25412	0.791414	0.351096	1.78984	1.40227	-5.63716	2.44504	0	9530020O07Rik
126	2280	12499	2279	2.24902	1.11076	0.493887	-0.324883	-1.78507	4.2899	-2.17994	0	Entpd5
127	12557	66447	12556	2.24389	0.618682	0.275718	-1.78442	-4.32054	7.32059	-1.21563	0	Mgst3
128	10974	53791	10973	2.23306	1.14702	0.513653	1.97942	1.10974	-4.29512	1.20595	0	Tlr5
129	6054	215456	6053	2.22928	1.30758	0.586547	-1.25045	-1.58311	4.06977	-1.23621	0	Gpat2
130	2317	12552	2316	2.22627	0.79786	0.358384	2.3654	2.06706	-5.42777	0.995302	0	Cdh11
131	16358	76509	16357	2.20773	1.06934	0.484359	1.19404	1.60375	-4.40787	1.61008	0	1600029D21Rik
132	3293	14863	3292	2.20263	0.926051	0.42043	-1.29741	-1.83838	4.78999	-1.6542	0	Gstm2
133	3085	14381	3084	2.20195	0.983629	0.446709	-0.72509	-1.63598	4.52886	-2.16779	0	G6pdx
134	7818	236690	7817	2.19578	0.828603	0.377361	-1.76009	-1.85789	5.18536	-1.56738	0	Nyx
136	7137	22779	7136	2.18901	0.83091	0.379582	1.98763	1.45507	-5.13748	1.69478	0	Ikzf2
137	5272	20443	5271	2.18346	0.863958	0.395682	2.25469	1.85411	-4.88141	0.772613	0	St3gal4
138	4561	18612	4560	2.18133	0.828731	0.379921	-1.92089	-1.5129	5.11994	-1.68615	0	Etv4
139	3180	14622	3179	2.17854	0.799476	0.366978	-3.32278	-1.71953	4.79258	0.249738	0	Gjb5
140	5782	212073	5781	2.17794	0.637367	0.292647	-2.60278	-1.26603	6.66776	-2.79895	0	4831426I19Rik
141	2711	13510	2710	2.17487	0.613851	0.282247	-2.70026	-1.76741	7.07028	-2.60261	0	Dsg1a
142	16179	75761	16178	2.17311	0.818053	0.376443	2.3381	0.784884	-5.04994	1.92695	0	Apol7a
143	2583	13090	2582	2.16483	0.579433	0.267658	-3.55874	-1.66403	7.61055	-2.38778	0	Cyp2b19
144	2800	13730	2799	2.16446	1.06275	0.491	1.23513	-0.570479	-3.69209	3.02744	0	Emp1
145	3600	16182	3599	2.1644	1.23933	0.572597	2.15999	0.913886	-3.89131	0.817433	0	Il18r1
146	16338	76459	16337	2.16159	0.757046	0.350227	-1.52825	-1.62268	5.43068	-2.27975	0	Car12
147	7735	235036	7734	2.15514	0.557566	0.258715	-4.65341	-3.63469	7.26459	1.02351	0	Ppan
148	4777	19156	4776	2.14937	0.949642	0.441824	-2.03908	-0.709853	4.45688	-1.70795	0	Psap
149	5270	20441	5269	2.13974	0.63563	0.29706	-4.28541	-1.38666	5.98654	-0.314463	0	St3gal3
150	2663	13393	2662	2.13569	1.02033	0.477752	-0.560883	-1.37512	4.18027	-2.24427	0	Dlx3
152	4209	17751	4208	2.12653	0.651019	0.306141	-2.08889	-2.41407	6.19163	-1.68868	0	Mt3
153	4531	18566	4530	2.12458	0.538668	0.253541	-5.55915	-1.63972	7.71224	-0.513375	0	Pdcd1
155	16923	80797	16922	2.11976	1.12313	0.529841	1.47927	1.18205	-4.04919	1.38787	0	Clca2
157	14873	71461	14872	2.1133	0.654556	0.309732	-1.40124	-2.59394	6.03696	-2.04178	0	Ptk7
158	6926	226040	6925	2.11215	0.91934	0.435262	-1.53838	-1.93622	4.46264	-0.988047	0	E030010A14Rik
159	7803	235661	7802	2.10701	0.54032	0.256439	-2.33125	-2.63703	8.09629	-3.12802	0	Dync1li1
160	3755	16592	3754	2.10531	1.35186	0.64212	-1.22697	-1.33728	3.71716	-1.1529	0	Fabp5
161	2602	13136	2601	2.1053	0.766229	0.363952	1.58339	0.937776	-5.03666	2.51549	0	Cd55
162	1908	11761	1907	2.10384	0.912125	0.433552	-2.84783	-1.64911	3.97904	0.517904	0	Aox1
163	11754	58860	11753	2.10097	1.1368	0.541085	1.95089	1.22251	-3.90718	0.733775	0	Adamdec1
164	1974	11848	1973	2.10056	0.741831	0.353159	-0.756529	-2.23855	5.15831	-2.16323	0	Rhoa
165	3658	16418	3657	2.10025	0.581508	0.276875	-1.77006	-1.78127	6.96605	-3.41473	0	Eif6
166	3244	14758	3243	2.09782	0.783776	0.373614	0.945896	2.39293	-4.9185	1.57967	0	Gpm6b
167	1119	104183	1118	2.09776	0.825903	0.393707	-1.25924	-2.00993	4.77088	-1.50171	0	Chi3l4
168	4279	17930	4278	2.09372	1.43131	0.68362	-1.35967	-0.266987	3.48011	-1.85345	0	Myom2
169	8422	244954	8421	2.08789	0.831074	0.398045	2.08555	1.79602	-4.65643	0.774864	0	Prss35
170	9170	26971	9169	2.08469	1.0832	0.519596	-0.780952	-1.34294	3.97056	-1.84666	0	Pla2g2f
171	15400	72852	15399	2.08408	0.733361	0.351887	-1.99717	-1.81464	5.222	-1.4102	0	Mblac2
173	7517	232441	7516	2.07758	1.06193	0.51114	1.5371	1.49477	-4.02568	0.993809	0	Rerg
174	1291	107094	1290	2.07736	0.662471	0.3189	-2.22881	-1.61179	5.76352	-1.92291	0	Rrp12
175	4397	18173	4396	2.07539	0.776556	0.374173	-2.27347	-0.720285	4.83975	-1.84599	0	Slc11a1
176	8217	241490	8216	2.06916	1.40508	0.679059	-2.1817	2.53109	-1.89339	1.544	0	Rbm45
177	10740	50798	10739	2.06501	0.570879	0.276453	3.4437	2.44242	-6.78002	0.89391	0	Gne
178	6811	224613	6810	2.05657	0.661998	0.321894	-2.66178	-1.01737	5.56761	-1.88846	0	Flywch1
179	2832	13849	2831	2.05496	0.671615	0.326827	-3.35868	-1.09571	5.29422	-0.83983	0	Ephx1
180	4207	17748	4206	2.05353	1.05505	0.513776	-0.823275	-1.64523	3.94989	-1.48139	0	Mt1
181	1100	103988	1099	2.04604	0.633848	0.309793	-0.9582	-2.39424	5.79477	-2.44232	0	Gck
182	7194	228775	7193	2.04219	0.90245	0.441903	-1.80813	-1.41001	4.28608	-1.06794	0	Trib3
183	14598	70426	14597	2.04196	1.09541	0.536449	-1.68147	-1.17321	3.85801	-1.00334	0	Tekt5
184	5660	209558	5659	2.03684	0.976214	0.479277	1.21318	1.22078	-4.08744	1.65348	0	Enpp3
185	8373	244152	8372	2.03658	0.730339	0.35861	-2.15224	-1.19482	4.9933	-1.64624	0	Tsku
186	2169	12314	2168	2.02223	0.734804	0.363364	1.96687	1.68734	-4.91481	1.26061	0	Calm2
187	17309	99681	17308	2.01904	0.870701	0.431244	2.12254	0.833596	-4.2535	1.29736	0	Tchh
188	2344	12608	2343	2.01546	0.78151	0.387758	-2.16657	-1.56217	4.59099	-0.862246	0	Cebpb
189	12226	64454	12225	2.01476	0.754995	0.374732	-1.38216	-1.96949	4.77132	-1.41966	0	Slc5a4b
190	14730	70835	14729	2.0124	0.668462	0.332171	2.83479	1.82216	-5.1555	0.498552	0	Prss22
191	5958	21418	5957	2.01215	0.612511	0.304406	-2.95932	-1.64901	5.80894	-1.20061	0	Tcfap2a
192	4417	18212	4416	2.01208	0.818023	0.406556	0.795679	2.24856	-4.39975	1.35551	0	Ntrk2
193	16839	78896	16838	2.01053	1.18746	0.590623	1.9201	1.06324	-3.57216	0.588822	0	1500015O10Rik
194	6802	22436	6801	2.00121	0.747388	0.373468	-0.894395	-2.0038	4.71373	-1.81554	0	Xdh
195	3645	16401	3644	1.99778	0.62385	0.312272	-2.02718	3.19134	-4.33924	3.17508	0	Itga4
196	6066	215707	6065	1.99325	0.618273	0.310183	-0.690791	-2.01244	5.56634	-2.86311	0	Ccdc92
197	10567	433375	10566	1.99152	0.682403	0.342655	-1.8564	-1.98374	5.1103	-1.27017	0	Creg1
199	904	100465	903	1.9883	0.711101	0.357643	-1.1733	-1.29083	4.85158	-2.38745	0	Mobkl2c
200	6487	21926	6486	1.98188	0.836962	0.422306	1.28199	2.27732	-4.18555	0.626239	0	Tnf
201	3254	14776	3253	1.97104	1.4905	0.756197	0.344539	-2.05536	2.94528	-1.23447	0	Gpx2
202	6777	224116	6776	1.97068	1.91891	0.973731	1.27234	0.713967	-3.08135	1.09504	0	Muc20
203	14606	70439	14605	1.96981	0.56038	0.284484	-1.2489	-1.8705	6.24456	-3.12515	0	Taf15
204	8	100034684	7	1.96718	0.988494	0.502493	2.74459	0.762721	-3.42853	-0.0787769	0	BC100530
205	15775	74251	15774	1.96708	0.623915	0.317179	-2.6577	-1.4428	5.42884	-1.32834	0	Ankrd9
206	15051	71920	15050	1.96461	1.4287	0.727217	-0.815524	-0.826053	3.27962	-1.63805	0	Epgn
208	7837	237175	7836	1.95183	0.663653	0.340016	1.1854	1.48592	-5.01426	2.34295	0	Gpr64
209	12866	66775	12865	1.95158	0.5762	0.295248	1.01756	2.28638	-5.8844	2.58047	0	Ptplad2
211	2201	12364	2200	1.94979	0.473777	0.242989	0.421907	3.04095	-8.02173	4.55887	0	Casp12
212	1880	11717	1879	1.94809	0.682662	0.350427	-1.68697	-1.27347	4.89539	-1.93495	0	Ampd3
213	4761	19124	4760	1.9463	1.09715	0.563712	-0.917981	-1.57608	3.59516	-1.10109	0	Procr
214	13137	67102	13136	1.94476	0.510995	0.262754	-1.84995	-2.12247	7.1015	-3.12908	0	D16Ertd472e
215	6035	215113	6034	1.94369	0.819072	0.4214	-1.56927	-2.04231	4.11988	-0.508297	0	Slc43a2
216	12137	63856	12136	1.93963	0.567585	0.292626	-2.62286	-1.88641	5.96441	-1.45515	0	Taf8
217	11849	60525	11848	1.93491	0.667353	0.3449	-2.76652	-1.75193	4.68729	-0.168835	0	Acss2
218	10997	53906	10996	1.93437	0.828376	0.42824	1.56672	0.400604	-4.03201	2.06468	0	Phgr1
219	2342	12606	2341	1.93188	0.577279	0.298818	-0.964232	-1.71724	5.67927	-2.9978	0	Cebpa
220	6792	22419	6791	1.92956	0.753722	0.390618	2.01741	1.96037	-4.27086	0.293081	0	Wnt5b
221	15558	73608	15557	1.92738	0.831364	0.431344	2.21306	0.96068	-4.02567	0.851934	0	Marveld3
222	4471	18405	4470	1.92277	0.746197	0.388084	-2.52168	-1.10023	4.27979	-0.657886	0	Orm1
223	1868	11699	1867	1.91986	2.08171	1.0843	0.598188	1.6975	-2.84888	0.553192	0	Ambp
224	4871	19250	4870	1.91701	0.609534	0.317961	-1.97305	-2.01609	5.32784	-1.3387	0	Ptpn14
225	6590	22184	6589	1.91642	0.568276	0.29653	-1.27049	-1.14896	5.65137	-3.23191	0	Zrsr2
226	120	100040792	119	1.91096	0.834971	0.436938	1.60421	1.43077	-4.04459	1.00961	0	Gm11627
227	14351	69656	14350	1.90514	0.882153	0.463038	-0.667261	-1.46387	3.85107	-1.71994	0	Pir
228	14630	70536	14629	1.90189	0.937386	0.492872	0.310455	1.98287	-3.62621	1.33289	0	Qpct
229	3191	14658	3190	1.8971	0.859305	0.452957	0.798518	1.70736	-3.9029	1.39702	0	Glrb
230	7441	231655	7440	1.89705	1.10154	0.580661	1.51568	0.752941	-3.45206	1.18344	0	Oasl1
231	16978	81879	16977	1.88631	0.6084	0.322535	2.54738	1.00051	-5.08805	1.54016	0	Tcfcp2l1
232	4898	19273	4897	1.88601	0.672746	0.356702	3.75009	1.0064	-3.5606	-1.19589	0	Ptpru
233	2827	13841	2826	1.88333	0.664701	0.35294	2.75239	0.979504	-4.52818	0.796288	0	Epha7
234	13419	67528	13418	1.88169	0.660343	0.35093	-1.35745	-2.04379	4.71189	-1.31064	0	Nudt7
235	7762	235330	7761	1.88108	0.75855	0.403253	-1.78614	-1.03789	4.1978	-1.37378	0	Ttc12
236	13431	67547	13430	1.87956	0.841174	0.447538	2.10295	2.16093	-3.2437	-1.02018	0	Slc39a8
237	7335	230673	7334	1.87932	0.668713	0.355828	-1.94066	-2.12281	4.53959	-0.476119	0	Ipo13
238	8725	258713	8724	1.87927	0.900945	0.479412	-2.169	-0.647526	3.64152	-0.824998	0	Olfr430
239	15588	73720	15587	1.87879	1.27422	0.678212	-0.794698	-1.61615	3.2041	-0.793247	0	Cst6
240	8273	242594	8272	1.87841	0.861947	0.458872	1.91102	0.457547	-3.76817	1.3996	0	1700024P16Rik
241	16103	75568	16102	1.87686	1.31675	0.70157	0.7792	0.899104	-3.18192	1.50362	0	Capsl
242	8212	24136	8211	1.87659	0.554272	0.295361	1.31761	3.00192	-5.61241	1.29289	0	Zeb2
243	10962	53614	10961	1.8751	0.596549	0.318143	1.2829	2.46285	-5.16769	1.42194	0	Reck
244	8135	24055	8134	1.87398	0.697211	0.372048	-1.46806	-1.26036	4.47073	-1.7423	0	Sh3bp2
245	2202	12365	2201	1.87181	1.34153	0.716702	-0.954806	-0.962343	3.17983	-1.26268	0	Casp14
246	11010	54123	11009	1.87102	1.04953	0.560941	0.619222	1.69608	-3.42349	1.10819	0	Irf7
247	11129	545260	11128	1.86701	0.740972	0.396876	2.36721	1.45865	-4.02598	0.20012	0	Arsi
248	6626	22259	6625	1.86378	0.656576	0.352281	-2.59269	-1.82374	4.37173	0.0446972	0	Nr1h3
249	3971	17084	3970	1.86286	0.872923	0.468594	0.68361	2.11397	-3.67564	0.87806	0	Ly86
250	16895	80288	16894	1.85824	0.606556	0.326415	-1.58084	-0.855213	4.93264	-2.49659	0	Bcl9l
251	1148	104681	1147	1.8545	0.594051	0.32033	-2.22676	-3.3177	4.14239	1.40207	0	Slc16a6
252	3157	14583	3156	1.85421	0.587316	0.316748	2.40812	0.987691	-5.12231	1.72649	0	Gfpt1
253	14784	71091	14783	1.85296	0.562211	0.303412	4.01401	0.992821	-4.76924	-0.237591	0	Cdkl1
254	7044	22700	7043	1.85196	0.656514	0.354496	1.74102	2.23435	-4.49126	0.515881	0	Zfp40
255	10565	433323	10564	1.84418	1.08259	0.587029	-0.539991	-1.69922	3.29559	-1.05639	0	Sgpp2
256	13357	67454	13356	1.84222	0.471398	0.255885	2.29965	3.09058	-7.06929	1.67906	0	Ikbip
257	5979	214424	5978	1.8419	0.848573	0.460704	-2.64795	-0.390307	3.44002	-0.401768	0	Parp16
258	6432	218772	6431	1.84172	0.642936	0.349095	1.86442	1.55157	-4.64469	1.2287	0	Rarb
259	5583	208820	5582	1.84144	0.540864	0.293719	2.43148	1.93983	-5.62855	1.25724	0	Gm11818
260	1548	109731	1547	1.84021	0.757856	0.41183	2.62778	1.10288	-3.73606	0.00540639	0	Maob
261	14854	71390	14853	1.83693	0.797454	0.434123	-1.49826	-1.1765	3.91517	-1.24042	0	5430425J12Rik
262	11714	58210	11713	1.83511	0.728992	0.397247	2.01623	0.923469	-4.10576	1.16606	0	Sectm1b
263	3686	16470	3685	1.8342	0.751161	0.409531	-0.987639	-1.20785	4.03588	-1.84039	0	Ush1g
264	16556	77296	16555	1.83091	1.3242	0.723247	2.07783	0.55489	-2.86468	0.231959	0	Fam162b
265	3606	16190	3605	1.83086	0.54896	0.299837	-1.48218	-1.11171	5.38149	-2.7876	0	Il4ra
266	16364	76527	16363	1.83071	0.732159	0.399932	-2.58133	-0.760477	3.90355	-0.561742	0	Il34
267	14901	71583	14900	1.82809	0.583295	0.319073	1.79304	0.760876	-4.97487	2.42096	0	9130008F23Rik
268	17109	93761	17108	1.82586	0.571252	0.312867	1.83049	1.63786	-5.18941	1.72106	0	Smarca1
269	6660	22333	6659	1.82209	0.583125	0.320031	-2.62313	-1.09829	4.93763	-1.21622	0	Vdac1
270	15034	71888	15033	1.82009	1.19118	0.654461	1.32787	0.702503	-3.16917	1.13879	0	Krt33a
272	8178	240916	8177	1.8188	0.957378	0.526379	-0.822207	-0.891652	3.43466	-1.7208	0	Vsig8
273	4867	19246	4866	1.8175	0.557397	0.306684	-0.865488	-1.41831	5.14173	-2.85793	0	Ptpn1
274	8024	239447	8023	1.81642	1.09707	0.603974	1.89152	0.842759	-3.14848	0.414196	0	Colec10
275	6469	219131	6468	1.81562	0.88127	0.485384	0.998012	1.49395	-3.61501	1.12305	0	Phf11
277	10587	433809	10586	1.81495	0.817172	0.450245	0.204474	-1.51712	3.47704	-2.16439	0	Rnf207
278	5028	19662	5027	1.81424	1.6166	0.891062	1.21822	1.10643	-2.87933	0.554682	0	Rbp4
279	5334	20539	5333	1.81196	0.505444	0.278949	-1.75122	-1.73855	5.99719	-2.50742	0	Slc7a5
280	15422	72948	15421	1.81035	0.443543	0.245004	1.28008	1.02219	-7.19897	4.89669	0	Tppp
281	10689	50498	10688	1.81007	0.843254	0.465869	1.73804	1.62378	-3.54595	0.18413	0	Ebi3
282	8303	242939	8302	1.8093	0.663752	0.366856	1.88477	1.3801	-4.34982	1.08496	0	Cpz
283	1948	11818	1947	1.80782	2.17068	1.20072	0.879418	1.26393	-2.70101	0.55766	0	Apoh
284	3295	14865	3294	1.80586	0.855752	0.473876	-1.58297	-1.0851	3.63514	-0.967074	0	Gstm4
285	16072	75475	16071	1.80384	0.514063	0.284983	-2.59076	-2.45319	5.64031	-0.596357	0	Oplah
286	10973	53761	10972	1.80355	0.644829	0.357533	-1.2708	-1.25069	4.44016	-1.91866	0	Bat2
287	2199	12359	2198	1.79715	1.00044	0.556681	-1.39979	-0.676538	3.3274	-1.25108	0	Cat
288	3460	15436	3459	1.79383	0.691795	0.385652	-1.9006	-1.65504	4.06487	-0.509236	0	Hoxd4
289	16505	77015	16504	1.79111	0.518899	0.289708	1.78878	1.72144	-5.62076	2.11054	0	Mpped2
290	4819	19216	4818	1.78874	0.839778	0.469481	1.6611	1.35419	-3.57423	0.55894	0	Ptger1
291	9476	29871	9475	1.78827	0.623513	0.348668	-0.983057	-1.45758	4.48403	-2.04339	0	Scmh1
292	15008	71839	15007	1.78819	0.94573	0.528874	-1.30274	-0.820861	3.40609	-1.2825	0	Osgin1
293	14912	71619	14911	1.78637	1.19189	0.667213	1.2978	0.135578	-2.97438	1.541	0	Arl14
294	11755	58861	11754	1.78359	0.787803	0.441696	0.89907	1.37753	-3.7466	1.46999	0	Cysltr1
295	1074	103655	1073	1.78071	1.2464	0.699947	-0.918085	-1.25718	3.04371	-0.868449	0	Sec14l4
296	11770	59001	11769	1.77869	0.44703	0.251326	-2.05535	-2.7376	7.11981	-2.32686	0	Pole3
297	2688	13448	2687	1.7763	0.52531	0.295733	-1.37008	-1.76151	5.39543	-2.26385	0	Dok1
298	7696	234669	7695	1.77561	1.01453	0.571372	-0.664092	-1.46994	3.2453	-1.11127	0	BC015286
299	3883	16981	3882	1.77406	0.703433	0.396511	2.46183	1.3219	-3.72424	-0.0594822	0	Lrrn3
300	2428	12795	2427	1.77306	1.30137	0.73397	-1.12466	-1.28804	2.95877	-0.546072	0	Plk3
301	5406	20687	5405	1.77136	0.482102	0.272165	1.38454	2.8624	-6.05291	1.80598	0	Sp3
302	13471	67605	13470	1.77097	0.456381	0.257701	-1.01208	-0.989265	6.32948	-4.32814	0	Akt1s1
303	4186	17533	4185	1.77019	0.917453	0.51828	0.650804	1.28263	-3.38198	1.44855	0	Mrc1
304	3776	16660	3775	1.7677	0.93778	0.53051	1.645	0.62856	-3.3198	1.04623	0	Krt31
305	13138	67103	13137	1.76744	1.13226	0.640622	-0.999134	-1.09161	3.12418	-1.03344	0	Ptgr1
306	2024	11964	2023	1.76735	0.551917	0.312285	-1.71049	-1.82933	5.03118	-1.49136	0	Atp6v1a
307	9342	27406	9341	1.76424	0.459328	0.260354	-2.62618	-1.64631	6.56862	-2.29613	0	Abcf3
308	2891	140494	2890	1.75984	1.19274	0.677751	-0.609429	-1.57884	2.98525	-0.796982	0	Atp6v0a4
309	13726	67998	13725	1.75686	0.621309	0.353648	-1.20896	-1.3593	4.37598	-1.80773	0	Fam134c
310	2354	12628	2353	1.75244	0.924301	0.527437	0.0946841	1.87537	-3.17263	1.20257	0	Cfh
311	16843	78906	16842	1.75186	0.939811	0.536466	1.75777	0.682873	-3.25203	0.81139	0	9130017N09Rik
312	9245	270624	9244	1.75106	0.857579	0.489748	0.709477	1.4504	-3.45017	1.29029	0	Spin4
313	7826	236899	7825	1.74977	0.714027	0.40807	-0.904757	-1.40859	3.87191	-1.55857	0	Pcyt1b
314	5564	20866	5563	1.74855	0.671192	0.383856	-0.88278	-2.02102	4.00766	-1.10386	0	Stim1
315	15631	73910	15630	1.74834	0.629175	0.359869	0.394782	1.3129	-4.12069	2.41301	0	Arhgap18
316	1831	11655	1830	1.74823	0.695949	0.398088	-1.6084	-1.60602	3.90913	-0.694708	0	Alas1
317	12215	64378	12214	1.74677	1.16691	0.668039	0.702138	1.61222	-2.97056	0.656196	0	Gpr88
319	15566	73649	15565	1.74595	0.633966	0.363106	1.66207	1.22106	-4.25378	1.37064	0	Cybrd1
320	11745	58801	11744	1.74375	0.678957	0.389365	0.00983555	1.74821	-3.78883	2.03078	0	Pmaip1
322	3483	15482	3482	1.74172	0.730229	0.419257	-2.98201	-0.93383	2.92362	0.992215	0	Hspa1l
323	2842	13865	2841	1.73986	0.816278	0.469163	0.649541	1.38924	-3.50034	1.46156	0	Nr2f1
324	2831	13848	2830	1.73949	0.678798	0.390228	-1.65966	-1.03654	3.98378	-1.28758	0	Ephb6
325	4438	18300	4437	1.73891	0.672556	0.38677	1.55352	1.4319	-4.01463	1.02922	0	Oit1
326	1816	11622	1815	1.73814	0.494679	0.284602	2.41985	1.20386	-5.55234	1.92863	0	Ahr
327	1388	108077	1387	1.73704	0.509592	0.293369	0.284908	-0.874092	4.61387	-4.02469	0	Skiv2l
328	2791	13711	2790	1.73653	0.650489	0.374592	2.29255	1.19821	-3.9747	0.483942	0	Elf5
330	16293	76279	16292	1.731	1.79505	1.037	1.13186	1.36449	-2.54893	0.052574	0	Cyp2d26
333	1159	104816	1158	1.72592	0.709245	0.410937	-1.43387	-1.38743	3.81074	-0.989436	0	Aspg
334	11646	57440	11645	1.7243	0.666358	0.386451	-1.74407	-0.894606	3.96343	-1.32476	0	Ehd3
335	6615	22239	6614	1.72377	0.88292	0.512204	0.280921	0.477409	-3.06016	2.30183	0	Ugt8a
336	3074	14362	3073	1.72345	0.625371	0.36286	2.01987	1.50516	-4.11584	0.590807	0	Fzd1
337	10686	50493	10685	1.72108	0.634	0.368374	-0.7544	-0.61439	3.93069	-2.5619	0	Txnrd1
338	11580	56847	11579	1.72082	0.85981	0.499651	1.46694	1.09287	-3.3626	0.802785	0	Aldh1a3
340	3604	16188	3603	1.7192	0.464507	0.270188	-2.39663	-1.6663	6.0001	-1.93717	0	Il3ra
341	15489	73246	15488	1.7187	1.42137	0.827	-0.731607	-0.855701	2.79373	-1.20642	0	Rassf6
343	12482	66341	12481	1.71281	0.570751	0.333225	-1.40914	-1.39009	4.53355	-1.73432	0	Eid3
344	14996	71816	14995	1.71276	0.843364	0.4924	1.73422	0.474126	-3.30834	1.1	0	Rnf180
345	10127	330286	10126	1.71174	0.611095	0.357001	-0.714986	-1.4432	4.16781	-2.00963	0	D630045J12Rik
346	14902	71584	14901	1.7086	1.23124	0.72061	-1.43154	-0.903137	2.84907	-0.514397	0	Gdpd2
347	6719	223726	6718	1.70803	0.537515	0.314698	0.526708	2.04895	-4.69481	2.11915	0	Mpped1
348	11549	56744	11548	1.69938	0.566875	0.333576	1.5186	1.60237	-4.49704	1.37607	0	Pf4
349	4800	19200	4799	1.69411	0.64223	0.379097	-1.09097	-1.46164	3.98022	-1.42761	0	Pstpip1
350	13571	67739	13570	1.69353	0.515496	0.304391	-1.73481	0.329892	4.50727	-3.10235	0	Slc48a1
351	6286	21762	6285	1.69155	0.380082	0.224695	-1.83247	-2.5939	8.86135	-4.43498	0	Psmd2
352	2217	12390	2216	1.69039	0.512988	0.303474	1.80924	1.16159	-4.96055	1.98972	0	Cav2
353	1627	110816	1626	1.6893	0.492517	0.291552	-2.15557	-1.70204	5.23782	-1.38021	0	Pwp2
354	10036	328443	10035	1.68922	0.89977	0.532655	1.33921	0.718548	-3.19868	1.14093	0	E130202H07Rik
355	1429	108687	1428	1.6855	0.68481	0.406294	0.301607	-0.883242	3.27768	-2.69605	0	Edem2
356	13537	67694	13536	1.68496	0.57725	0.342591	1.30832	1.75432	-4.32978	1.26714	0	Ift74
357	9344	27409	9343	1.68288	0.853749	0.507313	1.62607	1.59266	-3.03149	-0.187237	0	Abcg5
358	2358	12638	2357	1.6801	0.737884	0.439192	1.83776	1.10303	-3.46736	0.526576	0	Cftr
359	2481	12877	2480	1.67594	0.504831	0.301223	-2.86121	-1.83058	4.65987	0.0319156	0	Cpeb1
360	13658	67883	13657	1.67314	0.625297	0.373727	-2.03393	-1.75164	3.73753	0.0480433	0	Uxs1
361	10093	329738	10092	1.67101	0.734671	0.439657	-1.42771	-1.43921	3.49139	-0.624464	0	Aknad1
362	2413	12765	2412	1.66935	1.00993	0.604986	-1.16019	0.177079	2.75682	-1.77372	0	Cxcr2
363	15106	72016	15105	1.66708	0.654538	0.392625	-1.18264	-1.46042	3.81237	-1.16932	0	1600002H07Rik
364	11013	54128	11012	1.6667	0.519556	0.311727	-1.98957	-1.52181	4.73542	-1.22404	0	Pmm2
365	14740	70892	14739	1.66481	0.573516	0.344493	-0.790218	-2.06818	4.19443	-1.33604	0	Ttll7
366	10277	380855	10276	1.66476	0.506982	0.304538	2.4418	1.13311	-4.8098	1.2349	0	Rsl1
367	16593	77573	16592	1.66282	0.381144	0.229215	-5.24273	-1.39569	7.87174	-1.23332	0	Vps33a
368	9493	30805	9492	1.66194	1.30533	0.785427	-1.32397	-0.207014	2.65643	-1.12545	0	Slc22a4
369	13317	67416	13316	1.65752	0.699884	0.422247	1.61823	1.10211	-3.57094	0.850604	0	Armcx2
370	3221	14706	3220	1.65669	1.07328	0.647842	-0.661966	-1.31261	2.88939	-0.914811	0	Gng4
371	1564	109934	1563	1.6552	0.36967	0.223339	-2.24064	-2.29919	8.86839	-4.32855	0	Abr
373	5230	20363	5229	1.64838	0.765243	0.464239	1.96616	0.638864	-3.24442	0.639394	0	Sepp1
374	3956	170789	3955	1.6473	0.496306	0.301285	-1.52119	-1.7181	4.9057	-1.66642	0	Acot8
376	15965	74843	15964	1.64478	0.695315	0.42274	-1.33088	-2.44057	2.92907	0.842373	0	Zmynd17
377	10431	385658	10430	1.64384	0.874135	0.531764	-1.83261	-0.521752	3.01126	-0.656896	0	Fam55c
378	6298	217695	6297	1.63999	0.453358	0.27644	-1.83962	-1.73063	5.52632	-1.95608	0	Zfyve1
380	3917	170677	3916	1.63364	1.08097	0.661693	-0.957704	-0.470144	2.80115	-1.3733	0	Cdhr1
381	5511	20815	5510	1.63358	0.668474	0.409209	-0.578796	-1.27709	3.56129	-1.70541	0	Srpk1
382	17312	99738	17311	1.6323	0.522064	0.319834	-1.49615	-1.90844	4.49559	-1.091	0	Kcnc4
383	7617	233752	7616	1.63077	0.548697	0.336465	1.65816	0.876818	-4.24127	1.70629	0	Insc
384	12833	66737	12832	1.62915	0.487158	0.299025	-2.2158	-1.75636	4.82729	-0.855128	0	4921534H16Rik
385	7312	230316	7311	1.62808	0.493809	0.303307	-2.09429	-2.36117	4.56693	-0.111474	0	Megf9
386	17303	99571	17302	1.62642	1.74571	1.07334	1.15786	0.382089	-2.4624	0.92245	0	Fgg
387	14677	70676	14676	1.62492	0.76764	0.472417	1.26049	1.15545	-3.28714	0.871203	0	Gulp1
388	3869	16948	3868	1.62232	0.479434	0.295523	2.999	1.17924	-4.70265	0.52441	0	Lox
390	3651	16409	3650	1.62097	0.734503	0.453126	0.778729	1.21039	-3.34861	1.35949	0	Itgam
391	4032	171286	4031	1.62036	0.633254	0.39081	0.196392	1.11599	-3.5149	2.20252	0	Slc12a8
392	10935	53378	10934	1.61916	0.433483	0.267721	1.85248	1.13932	-5.6782	2.68639	0	Sdcbp
393	16863	791275	16862	1.6163	0.546796	0.338302	0.876208	1.60121	-4.18172	1.7043	0	Gm9885
394	9186	269881	9185	1.61626	0.399152	0.246961	-1.86786	-1.86689	6.68537	-2.95063	0	Map3k10
395	4106	17254	4105	1.61454	0.95763	0.59313	-0.685152	-0.459079	2.82874	-1.68451	0	Slc3a2
397	13750	68041	13749	1.61119	0.768294	0.476849	-0.811491	-1.30361	3.23724	-1.12214	0	Mid1ip1
398	3481	15476	3480	1.60952	0.642671	0.399294	1.18745	1.49601	-3.62344	0.939982	0	Hs3st1
399	2913	140630	2912	1.60905	0.573153	0.356207	-1.50177	-1.70699	3.94729	-0.738527	0	Ube4a
400	7740	235047	7739	1.60904	0.526303	0.327091	2.27909	0.633346	-4.23005	1.31762	0	Zfp809
401	1837	11670	1836	1.6072	1.50515	0.936508	0.54408	-1.46412	2.16454	-1.2445	0	Aldh3a1
402	3010	14226	3009	1.60518	0.494153	0.307849	2.39723	1.4552	-4.53281	0.680379	0	Fkbp1b
403	14445	69890	14444	1.60483	0.623431	0.388472	-0.554112	-1.1892	3.61621	-1.87289	0	Zfp219
404	11471	56489	11470	1.60256	0.489192	0.305257	-0.748279	-1.72193	4.61261	-2.14239	0	Ikbke
405	2929	140792	2928	1.60201	0.562616	0.351193	1.54828	1.97967	-3.90069	0.372736	0	Colec12
406	11184	546144	11183	1.59915	1.42385	0.890376	1.07177	0.823437	-2.55463	0.659432	0	Wdr72
407	8141	24060	8140	1.59911	0.832489	0.520594	1.33207	1.09226	-3.05243	0.628098	0	Slc35a1
408	17086	93695	17085	1.59868	0.809848	0.506572	-1.23868	-0.803152	3.11322	-1.07139	0	Gpnmb
409	5927	213948	5926	1.59687	0.644558	0.403639	0.368407	-1.76419	3.23644	-1.84066	0	Atg9b
410	2856	13982	2855	1.59627	0.797232	0.499433	-1.82348	1.26672	-1.7322	2.28896	0	Esr1
411	14084	68874	14083	1.59603	0.402573	0.252234	2.53023	1.86397	-6.33643	1.94223	0	Klhdc9
412	15691	74104	15690	1.59222	0.643706	0.404283	-1.61257	-0.900636	3.53718	-1.02397	0	Abcb6
413	15713	74137	15712	1.59217	0.541993	0.34041	-2.32393	-1.38018	3.922	-0.217886	0	Nuak2
414	2868	14017	2867	1.58954	0.738891	0.464845	0.41994	1.54886	-3.17621	1.20741	0	Evi2a
415	12217	64380	12216	1.58438	0.709509	0.447814	-1.06977	-1.22115	3.31406	-1.02315	0	Ms4a4c
416	15785	74270	15784	1.58422	0.488135	0.308124	-2.03329	-0.947857	4.53905	-1.5579	0	Usp20
417	7742	235050	7741	1.58418	0.538687	0.340041	2.43553	0.514693	-3.92537	0.975144	0	Zfp810
418	8173	24088	8172	1.58339	0.46221	0.291911	2.13013	1.43099	-4.89235	1.33123	0	Tlr2
420	14731	70839	14730	1.58314	1.01519	0.641251	0.93968	0.617043	-2.77361	1.21689	0	P2ry12
421	16253	76117	16252	1.58273	0.95916	0.606016	0.567423	1.24005	-2.82603	1.01855	0	Arhgap15
422	2797	13723	2796	1.58222	0.509997	0.32233	-1.21159	-2.36274	4.21104	-0.636698	0	Emb
423	1234	106039	1233	1.58177	0.483731	0.305816	-0.635691	-1.66645	4.51793	-2.21579	0	Gga1
424	3558	16004	3557	1.58042	0.640495	0.40527	-1.49965	-1.3043	3.49733	-0.693383	0	Igf2r
425	16597	77579	16596	1.57801	0.399213	0.252985	2.1805	3.00865	-6.10751	0.918353	0	Myh10
426	8286	242700	8285	1.57726	0.381628	0.241956	2.50955	1.21198	-6.7817	3.06018	0	Il28ra
428	12379	66168	12378	1.5745	0.611333	0.388271	-1.978	-0.638329	3.53215	-0.915817	0	Grina
429	13598	67775	13597	1.57365	0.873151	0.554856	0.348885	1.11639	-2.86972	1.40445	0	Rtp4
430	15038	71893	15037	1.57306	0.715818	0.455048	1.85008	0.528742	-3.1449	0.766069	0	Noxo1
431	2944	14089	2943	1.57286	0.72921	0.46362	0.366139	1.05128	-3.11962	1.70219	0	Fap
432	9712	319945	9711	1.57239	0.427956	0.272168	-2.9856	-1.86103	5.18759	-0.340962	0	Flad1
433	5465	20762	5464	1.57118	0.996553	0.634272	-1.36997	-0.895593	2.73233	-0.466775	0	Sprr2h
434	10279	380863	10278	1.57005	0.943102	0.600682	1.23648	0.376113	-2.78289	1.1703	0	Tmem171
435	1942	11807	1941	1.56965	1.68091	1.07089	0.825673	1.2972	-2.32906	0.206187	0	Apoa2
436	8388	244416	8387	1.56809	0.524512	0.334491	1.84463	1.73933	-4.02815	0.44419	0	Ppp1r3b
437	8129	240505	8128	1.56398	0.775436	0.495808	-0.943705	-1.42549	3.0566	-0.687402	0	Cdc42bpg
438	14332	69590	14331	1.56322	0.522313	0.334126	1.16174	0.959881	-4.08068	1.95906	0	Gpx8
439	6835	224807	6834	1.56305	0.521903	0.333901	-0.699282	-2.36062	3.984	-0.924102	0	Tmem63b
440	6236	217262	6235	1.56139	0.645578	0.413465	-0.521747	1.3821	-3.00459	2.14424	0	Abca9
441	2230	12408	2229	1.55779	0.928556	0.596073	-1.1135	-0.966378	2.82108	-0.741198	0	Cbr1
442	6014	214804	6013	1.55766	0.494324	0.31735	-0.579896	2.16419	-3.87558	2.29129	0	Syde2
443	7722	234836	7721	1.55735	0.671916	0.431448	0.228374	2.74938	-2.67321	-0.304547	0	Il17c
444	1941	11806	1940	1.55636	0.978271	0.628565	1.2255	1.09226	-2.7169	0.399136	0	Apoa1
445	4985	19383	4984	1.55621	0.437917	0.2814	-1.19641	-1.27012	5.01637	-2.54985	0	Raly
446	4382	18133	4381	1.55561	0.762153	0.489937	1.13233	0.627848	-3.06359	1.30341	0	Nov
447	10149	330671	10148	1.55548	0.606961	0.390208	0.247586	-1.05797	3.19537	-2.38498	0	B4galnt4
448	7240	229445	7239	1.55487	0.478144	0.307514	1.74729	1.35266	-4.5061	1.40615	0	Ctso
449	7968	23879	7967	1.55262	0.539685	0.347597	-0.353225	-1.21645	3.77807	-2.20839	0	Fxr2
450	9325	27380	9324	1.55159	0.443959	0.286131	-1.97852	-2.13117	4.87692	-0.767225	0	Tcl1b4
451	17219	97440	17218	1.55101	0.550935	0.355209	0.792018	1.96351	-3.78711	1.03158	0	B3gnt9-ps
452	2182	12333	2181	1.55049	0.567233	0.365841	-0.846076	-1.16031	3.72187	-1.71548	0	Capn1
453	3949	170765	3948	1.54986	0.641637	0.413997	0.429695	1.09934	-3.31258	1.78354	0	Ripply3
454	3921	17071	3920	1.5469	0.545667	0.352749	1.57346	-3.83357	1.52568	0.73443	0	Ly6f
455	1460	108927	1459	1.54555	0.771899	0.499432	1.01514	1.18558	-3.03533	0.8346	0	Lhfp
456	1099	103968	1098	1.5447	1.34921	0.873444	-1.49845	0.115649	-0.89922	2.28202	0	Plin1
457	16278	76222	16277	1.5445	0.576868	0.373498	0.530334	2.56458	-3.33859	0.243676	0	Magef1
458	2675	13423	2674	1.54388	0.671728	0.435091	-0.68717	-1.24172	3.26253	-1.33364	0	Dnase2a
459	2993	14184	2992	1.54336	0.565859	0.366642	1.65533	1.64837	-3.61388	0.310178	0	Fgfr3
460	16484	76933	16483	1.54322	1.04773	0.678924	0.58858	1.05134	-2.65521	1.01529	0	Ifi27l2a
461	12405	66205	12404	1.5428	0.576213	0.373486	0.934308	0.71405	-3.58857	1.94022	0	Cd302
462	12380	66171	12379	1.54254	0.44064	0.285659	-1.06146	-1.35277	4.86321	-2.44899	0	Pgls
463	12711	66615	12710	1.54137	0.492308	0.319396	-0.755791	-0.577255	4.02876	-2.69571	0	Atg4b
464	9913	320712	9912	1.541	0.854801	0.554706	1.02617	0.919121	-2.88487	0.939573	0	Abi3bp
465	3352	15115	3351	1.54042	0.51827	0.336447	-1.1055	-1.47614	4.03454	-1.4529	0	Hars
466	16447	76813	16446	1.53983	0.423717	0.275171	-1.58395	-1.67125	5.22308	-1.96788	0	Armc6
467	3427	15375	3426	1.53891	0.526776	0.342304	2.12715	0.395037	-3.82483	1.30264	0	Foxa1
468	2562	13040	2561	1.53874	0.637057	0.414011	0.642229	1.67287	-3.32937	1.01427	0	Ctss
469	933	100910	932	1.53652	0.456386	0.297026	-1.45693	-1.16961	4.63451	-2.00797	0	Chpf2
470	9362	276829	9361	1.53468	0.974664	0.635093	-0.53494	-1.30894	2.67947	-0.835585	0	Smtnl2
471	11328	56213	11327	1.53416	0.4108	0.267769	1.14622	2.2521	-5.40634	2.00801	0	Htra1
472	8093	240064	8092	1.53409	0.454797	0.296461	0.457383	0.994571	-4.38691	2.93495	0	Zfp799
473	13722	67993	13721	1.53183	0.596325	0.389289	-1.03206	-0.399058	3.39658	-1.96547	0	Nudt12
474	5687	209837	5686	1.53166	0.678373	0.442902	1.30815	1.50583	-3.13258	0.3186	0	Slc38a5
475	3290	14859	3289	1.53113	0.701255	0.457999	-0.744379	-1.09993	3.14324	-1.29893	0	Gsta3
476	3239	14745	3238	1.52697	0.561388	0.367647	1.6104	1.50909	-3.60894	0.489452	0	Lpar1
477	16537	77117	16536	1.52362	0.679158	0.445752	1.26731	1.39584	-3.1397	0.476554	0	6720457D02Rik
478	13717	67978	13716	1.52349	0.469901	0.308436	-0.261763	2.45512	-4.04512	1.85177	0	Tctn2
479	1120	104184	1119	1.52345	0.806448	0.529357	-0.990741	-1.16918	2.90263	-0.742708	0	Blmh
480	1969	118451	1968	1.52331	0.363486	0.238616	-1.71289	-2.96637	6.82768	-2.14841	0	Mrps2
481	6664	22339	6663	1.52258	0.50488	0.331594	-1.03364	-1.53182	4.04248	-1.47702	0	Vegfa
483	16729	78388	16728	1.52031	0.477384	0.314003	-0.321893	-1.08379	4.0516	-2.64593	0	Mvp
484	15899	74568	15898	1.51885	0.61313	0.40368	-1.19924	-1.24657	3.40168	-0.955872	0	Mlkl
485	4306	17988	4305	1.51763	0.661382	0.4358	0.987729	1.43847	-3.2047	0.778503	0	Ndrg1
486	1105	104079	1104	1.51687	0.633714	0.417779	-1.46811	-0.593773	3.27515	-1.21327	0	Nxph3
488	2813	13809	2812	1.51647	0.705573	0.465273	0.981765	1.06764	-3.10263	1.05322	0	Enpep
490	8063	239796	8062	1.51562	0.472454	0.311724	-1.44573	-1.13851	4.3125	-1.72827	0	1600021P15Rik
491	3013	14229	3012	1.51354	0.766862	0.506667	-0.612732	-0.933374	2.92078	-1.37468	0	Fkbp5
493	8032	239546	8031	1.51255	0.408275	0.269925	2.73835	1.46235	-5.185	0.984303	0	Zfp647
496	14226	69253	14225	1.51127	0.653867	0.432661	-1.69409	-1.19307	3.09769	-0.210524	0	Hspb2
497	3359	15139	3358	1.51009	1.71023	1.13254	0.68028	1.31501	-2.20578	0.21049	0	Hc
498	1780	11537	1779	1.50917	1.34534	0.891446	-2.34736	0.25447	0.877343	1.21555	0	Cfd
500	13777	68095	13776	1.50804	0.65145	0.431984	-1.75698	-0.480562	3.12887	-0.891331	0	Ociad1
501	14664	70620	14663	1.50796	0.527862	0.35005	0.825527	1.88239	-3.74432	1.03641	0	Ube2v2
502	1345	107747	1344	1.5079	1.0383	0.688572	-0.570326	-1.37248	2.53993	-0.597131	0	Aldh1l1
503	3590	16172	3589	1.50746	0.411006	0.272649	-1.06299	-0.778463	4.95646	-3.11501	0	Il17ra
504	9836	320427	9835	1.50685	0.813445	0.539831	-0.796762	-0.543484	2.79747	-1.45722	0	A830021K08Rik
505	17096	93726	17095	1.50416	1.21397	0.807074	-1.77691	-0.623825	2.13287	0.267865	0	Ear11
507	15538	73458	15537	1.50348	0.755433	0.502455	-0.501768	-1.45967	2.89184	-0.930405	0	1700055N04Rik
508	5882	213469	5881	1.50323	0.515106	0.342667	2.01313	2.07818	-3.32264	-0.768677	0	Lgi3
510	11337	56223	11336	1.50212	0.546004	0.363489	-1.09817	-0.849529	3.62668	-1.67898	0	Fscn3
511	2430	12797	2429	1.50169	0.712893	0.474726	2.39953	0.397755	-2.51184	-0.28545	0	Cnn1
512	10904	52858	10903	1.50034	0.503701	0.335725	-1.82081	-0.32445	3.81485	-1.66959	0	Cdipt
513	5838	212999	5837	1.50023	0.506934	0.337905	-0.803296	-1.29622	3.8744	-1.77488	0	Tnpo2
514	16222	75985	16221	1.50016	0.61515	0.410056	1.33608	1.33811	-3.28796	0.613768	0	Rab30
516	1041	102871	1040	1.49816	0.553694	0.369582	1.42407	1.71471	-3.49379	0.355012	0	D330045A20Rik
517	15506	73316	15505	1.49813	0.603391	0.402762	-0.410609	-1.4721	3.28655	-1.40384	0	Calr3
518	10727	50781	10726	1.49684	0.602598	0.402579	1.42771	0.889046	-3.34692	1.03016	0	Dkk3
519	7558	232947	7557	1.49657	0.456496	0.305028	-1.09165	-0.815197	4.2705	-2.36365	0	Lrrc68
520	9312	27359	9311	1.49572	0.507209	0.339106	2.58351	0.576781	-3.60718	0.44689	0	Sytl4
521	6180	216864	6179	1.49425	0.767902	0.513906	-0.280416	1.36454	-2.62576	1.54163	0	Mgl2
522	16630	77749	16629	1.49423	0.570729	0.381954	-0.359992	-2.17291	3.29628	-0.763385	0	9230112J17Rik
523	16648	77862	16647	1.49262	0.452251	0.302991	1.44813	1.10943	-4.39197	1.83441	0	Thyn1
525	1026	102580	1025	1.48982	0.429674	0.288408	-0.512224	-1.67586	4.5665	-2.37842	0	Alg9
526	1091	103836	1090	1.48957	0.532538	0.357512	0.0999911	-1.98974	3.43234	-1.54259	0	Zfp692-ps
23	817	100048506	816	3.66577	2.0214	0.551426	2.70241	1.8475	-6.86266	2.31276	0
34	1415	108176	1414	3.32821	1.0097	0.303375	-3.94338	-3.00764	9.8005	-2.84948	0
38	12648	665586	12647	3.18306	1.17183	0.368147	-3.04486	-1.76139	7.63259	-2.82634	0
53	12986	668830	12985	2.87333	1.08044	0.376025	-2.17942	-2.75836	6.78591	-1.84814	0
61	14829	71305	14828	2.72198	0.841774	0.309251	2.10423	1.93507	-7.75456	3.71527	0
62	739	100047868	738	2.70779	0.931991	0.344189	-1.84773	-2.30884	6.92382	-2.76725	0
69	12049	632433	12048	2.64518	0.680205	0.257149	3.978	4.13359	-10.0124	1.90079	0
82	310	100044207	309	2.54981	1.22414	0.48009	-1.2904	-2.21349	5.09409	-1.59021	0
83	595	100046684	594	2.53577	0.761359	0.300247	-3.04926	-1.66566	7.5335	-2.81859	0
101	384	100044697	383	2.41108	0.927458	0.384666	2.3359	1.67879	-5.58709	1.5724	0
106	281	100044005	280	2.37224	0.626292	0.264009	3.24103	3.99959	-8.46523	1.22461	0
116	63	100039358	62	2.29561	0.685547	0.298634	-1.3547	-1.93798	6.7845	-3.49182	0
135	299	100044160	298	2.19324	0.903334	0.411871	0.965084	2.24823	-4.78557	1.57226	0
151	12831	667353	12830	2.1304	0.645329	0.302915	-1.9598	-2.73072	6.26099	-1.57047	0
154	15891	74548	15890	2.12263	0.883131	0.416056	-0.710924	-1.85852	4.57879	-2.00934	0
156	12051	632638	12050	2.11769	0.569232	0.268799	2.55199	2.74805	-7.46857	2.16853	0
172	165	100041907	164	2.08169	0.645545	0.310105	-1.68401	-2.22303	5.97174	-2.0647	0
198	10111	330126	10110	1.98992	1.55253	0.780195	1.22752	1.2026	-3.29534	0.865219	0
207	14678	70678	14677	1.95591	0.808604	0.413416	-2.89339	-1.20354	3.86462	0.232307	0
210	13404	675010	13403	1.95101	0.721568	0.369844	-0.479175	-2.1997	4.5526	-1.87373	0
271	15642	73988	15641	1.82	1.43494	0.788432	-1.09399	-0.504082	2.9649	-1.36682	0
276	12133	638247	12132	1.81549	0.55979	0.308341	-0.200977	-1.3623	4.88485	-3.32158	0
318	330	100044280	329	1.74628	0.563018	0.32241	0.133944	1.75065	-4.53449	2.6499	0
321	13252	672857	13251	1.742	0.470839	0.270287	-1.21127	-2.19252	6.02823	-2.62443	0
329	11929	624275	11928	1.73237	0.779514	0.44997	-1.54011	-1.32226	3.57755	-0.71517	0
331	7812	236451	7811	1.72862	0.928209	0.536965	0.673187	1.2592	-3.25554	1.32314	0
332	12127	637970	12126	1.7261	0.92601	0.536476	-0.550745	-2.52865	2.74788	0.33151	0
339	827	100048556	826	1.71961	1.03221	0.600258	1.67488	0.68498	-3.03535	0.675488	0
342	15353	72704	15352	1.71673	0.728432	0.424313	0.228583	2.05597	-3.54614	1.26158	0
372	390	100044746	389	1.65501	0.867766	0.524327	-0.204737	-1.18274	3.04796	-1.66048	0
375	791	100048307	790	1.64535	0.568848	0.345731	-1.4292	-1.64169	4.19045	-1.11956	0
379	62	100039354	61	1.63987	0.626394	0.381977	-1.76304	-1.12549	3.79828	-0.909751	0
389	11990	627995	11989	1.62112	0.46653	0.287783	2.72691	0.508048	-4.95792	1.72296	0
396	473	100045556	472	1.61212	0.757054	0.469601	1.25735	1.81987	-3.07645	-0.000772838	0
419	72	100039623	71	1.58328	0.481557	0.304152	-3.48285	-1.03185	3.92547	0.589234	0
427	15411	72904	15410	1.57614	0.45625	0.289473	1.52695	1.30482	-4.93138	2.09962	0
482	10548	432817	10547	1.5207	0.875817	0.575929	-1.12831	-0.853028	2.7942	-0.812858	0
487	327	100044273	326	1.51672	0.532	0.350758	1.98371	1.00118	-3.73715	0.752257	0
489	14613	70455	14612	1.51576	0.463381	0.305708	2.98025	0.475875	-4.08556	0.629435	0
492	12029	630896	12028	1.51269	0.667335	0.441159	-1.59701	0.358853	2.87435	-1.63619	0
494	544	100046186	543	1.51204	0.612121	0.404831	-1.76397	-0.417824	3.28284	-1.10104	0
495	153	100041503	152	1.5117	0.462617	0.306024	-2.49936	-1.45166	4.19244	-0.241422	0
499	15542	73476	15541	1.5089	0.571081	0.378475	-0.863954	-0.871289	3.49986	-1.76462	0
506	183	100042314	182	1.5037	0.668481	0.444556	-0.506663	-1.97513	2.98611	-0.504314	0
509	12988	668838	12987	1.50222	0.504272	0.335684	1.45675	1.45562	-3.93982	1.02745	0
515	798	100048346	797	1.49838	0.868256	0.579461	0.673424	1.34949	-2.71317	0.690254	0
524	685	100047450	684	1.49202	0.467626	0.313418	-3.74592	-0.433448	1.40566	2.7737	0

## Sheet: Two-calss SAM WT vs. Nrf2-
35A vs.35B up	Row	Gene ID	Gene Name	Score(d)	Numerator(r)	Denominator(s+s0)	Fold Change	q-value(%)	Column A
1	8217	241490	8216	12.1739	2.39954	0.197105	5.27634	0	Rbm45
35A vs.35B down	Row	Gene ID	Gene Name	Score(d)	Numerator(r)	Denominator(s+s0)	Fold Change	q-value(%)
1	4331	18024	4330	-7.85946	-1.70856	0.217388	0.305966	0	Nfe2l2
2	6630	22270	6629	-6.87283	-1.5542	0.226137	0.340517	0	Upk3a
3	16602	77592	16601	-5.34951	-0.688518	0.128707	0.620491	0	4931406H21Rik

## Sheet: Two-calss SAM WT vs. Keap1-
	Row	Gene ID	Gene Name	Score(d)	Numerator(r)	Denominator(s+s0)	Fold Change	q-value(%)	ProbeID	GeneSymbol
48	3171	14609	3170	6.4513	1.59781	0.247672	3.02683	0	A_52_P174915	Gja1
60	15588	73720	15587	6.04995	2.03261	0.335972	4.09145	0	A_51_P417933	Cst6
131	14984	71791	14983	4.89753	1.4153	0.288982	2.66715	0	A_52_P158376	Cpa4
296	5281	20459	5280	3.53689	1.07628	0.304302	2.1086	0.088455	A_52_P375047	Ptk6
1	8988	26570	8987	14.8688	3.8869	0.261414	14.7936	0	A_51_P129502	Slc7a11
2	8010	239273	8009	14.6386	2.35371	0.160788	5.11137	0	A_52_P630867	Abcc4
3	1748	11486	1747	14.1674	3.95201	0.278951	15.4766	0	A_51_P430423	Ada
4	3185	14630	3184	10.7202	2.62823	0.245165	6.18266	0	A_51_P320089	Gclm
5	5506	20811	5505	10.5797	2.55754	0.241742	5.88705	0	A_52_P534235	Srms
6	10355	381801	10354	10.3048	2.12835	0.20654	4.37219	0	A_52_P677718	Tatdn2
7	3184	14629	3183	9.99041	3.87518	0.38789	14.6739	0	A_51_P365019	Gclc
8	3297	14867	3296	9.94978	2.44254	0.245487	5.43598	0	A_52_P415996	Gstm6
9	4279	17930	4278	9.85638	2.48627	0.25225	5.60326	0	A_51_P431785	Myom2
10	9286	27226	9285	9.80858	1.95367	0.19918	3.87359	0	A_51_P447835	Pla2g7
11	1775	11529	1774	9.54194	4.01287	0.420551	16.1434	0	A_51_P233797	Adh7
12	16320	76408	16319	9.53992	1.87705	0.196758	3.67324	0	A_52_P622067	Abcc3
13	16399	76650	16398	9.48895	2.81165	0.296308	7.02089	0	A_51_P330125	Srxn1
14	15139	72088	15138	9.40139	3.75564	0.399477	13.507	0	A_52_P431843	Ush1c
15	3878	16975	3877	9.25107	2.55256	0.275921	5.86676	0	A_51_P445765	Lrp8
16	13793	68137	13792	9.16356	2.08302	0.227316	4.23694	0	A_52_P596541	Kdelr1
17	3298	14870	3297	8.94779	2.06135	0.230375	4.17376	0	A_51_P374464	Gstp1
18	11505	56615	11504	8.84307	1.84	0.208073	3.5801	0	A_52_P549827	Mgst1
20	7569	233016	7568	8.63046	2.02588	0.234736	4.0724	0	A_51_P460844	Blvrb
21	11778	59010	11777	8.59524	2.00684	0.233483	4.01902	0	A_51_P209261	Sqrdl
22	11089	54427	11088	8.49677	2.2926	0.26982	4.89939	0	A_51_P496720	Dnmt3l
23	1778	11535	1777	8.46825	2.29901	0.271486	4.92121	0	A_51_P265571	Adm
24	13819	68188	13818	8.42709	1.57364	0.186736	2.97656	0	A_51_P183275	Sympk
25	3139	14546	3138	8.41807	2.18979	0.26013	4.5624	0	A_51_P267587	Gdap10
26	7368	230863	7367	8.35309	2.68901	0.321918	6.4487	0	A_51_P340038	Sh2d5
27	9493	30805	9492	8.11518	2.45002	0.301906	5.46425	0	A_51_P502225	Slc22a4
28	14228	69257	14227	8.08101	1.67728	0.207558	3.19823	0	A_51_P496273	Elf2
29	2351	12623	2350	8.05112	3.00892	0.373726	8.04959	0	A_52_P245962	Ces1
31	4405	18190	4404	7.84951	1.66948	0.212686	3.181	0	A_51_P431827	Nrxn2
32	16238	76072	16237	7.82964	2.62238	0.33493	6.15766	0	A_51_P432288	Rnf183
33	6103	216188	6102	7.8274	1.96218	0.25068	3.89649	0	A_51_P468658	Aldh1l2
34	4777	19156	4776	7.60982	1.76637	0.232117	3.40197	0	A_52_P508089	Psap
35	5766	211666	5765	7.51327	1.2854	0.171084	2.4375	0	A_51_P150120	Mgst2
36	9574	319317	9573	7.41185	2.62627	0.354333	6.17427	0	A_52_P70888	Snhg11
38	13918	68441	13917	7.00268	1.56844	0.223977	2.96583	0	A_51_P226417	Rraga
39	15567	73652	15566	6.86904	1.96679	0.286327	3.90897	0	A_51_P436610	2210408F21Rik
41	14516	70152	14515	6.77483	1.51465	0.22357	2.8573	0	A_51_P218137	Mettl7a1
42	7818	236690	7817	6.75947	1.44087	0.213163	2.71485	0	A_51_P449867	Nyx
43	7351	230770	7350	6.75543	1.58649	0.234846	3.00317	0	A_52_P357039	Tmem39b
44	15400	72852	15399	6.69404	1.31375	0.196257	2.48588	0	A_51_P420726	Mblac2
45	981	101744	980	6.54482	2.16878	0.331374	4.49644	0	A_51_P137800	C330005M16Rik
46	11025	54160	11024	6.50374	1.3006	0.199977	2.46331	0	A_52_P362015	Copg2
47	2711	13510	2710	6.47798	1.09764	0.169442	2.14005	0	A_52_P475111	Dsg1a
49	2852	13885	2851	6.4311	1.83637	0.285546	3.57111	0	A_52_P611000	Esd
50	17096	93726	17095	6.42294	2.49119	0.387858	5.62243	0	A_51_P455338	Ear11
51	4653	18792	4652	6.41676	1.8456	0.287622	3.59403	0	A_51_P305311	Plau
52	1998	11898	1997	6.36641	1.89743	0.298037	3.72548	0	A_51_P338713	Ass1
53	8691	258633	8690	6.28227	2.31933	0.369186	4.991	0	A_52_P361391	Olfr1153
54	6926	226040	6925	6.26261	1.59241	0.254272	3.01553	0	A_52_P141608	E030010A14Rik
55	4471	18405	4470	6.21773	1.48393	0.238662	2.7971	0	A_51_P336325	Orm1
57	4104	17250	4103	6.15583	1.37116	0.222742	2.58679	0	A_52_P491507	Abcc1
59	1809	11604	1808	6.05694	2.06669	0.341211	4.18925	0	A_51_P347965	Agrp
61	3791	16680	3790	6.00982	1.69517	0.282067	3.23815	0	A_51_P367880	Krt84
62	10977	53857	10976	5.98288	2.53822	0.424247	5.80873	0	A_52_P303161	Tuba8
63	10925	53328	10924	5.97924	1.23913	0.207238	2.36056	0	A_51_P144581	Pgrmc1
64	6575	22144	6574	5.97858	1.60902	0.26913	3.05044	0	A_51_P145404	Tuba3a
65	4953	19345	4952	5.9643	1.21392	0.203531	2.31967	0	A_51_P486479	Rab5c
67	10093	329738	10092	5.87773	1.32693	0.225756	2.50869	0	A_52_P358127	Aknad1
68	4853	19225	4852	5.86757	1.75692	0.299429	3.37976	0	A_51_P254855	Ptgs2
69	4854	19227	4853	5.84968	1.56533	0.267592	2.95945	0	A_51_P129363	Pthlh
70	5270	20441	5269	5.8175	1.30612	0.224516	2.47276	0	A_52_P203741	St3gal3
72	3460	15436	3459	5.74393	1.28703	0.224068	2.44025	0	A_51_P260265	Hoxd4
74	8308	243197	8307	5.7357	1.64017	0.285958	3.11703	0	A_52_P658320	Mfsd7a
75	6269	217430	6268	5.73367	1.33702	0.233187	2.52629	0	A_51_P332652	Pqlc3
76	3195	14664	3194	5.67467	1.4891	0.262412	2.80714	0	A_51_P351872	Slc6a9
78	9248	270685	9247	5.59699	0.988097	0.176541	1.98357	0	A_52_P167278	Mthfd1l
79	8478	246221	8477	5.59406	1.68307	0.300867	3.2111	0	A_51_P200529	Mpst
80	10567	433375	10566	5.53593	1.2035	0.217397	2.30297	0	A_52_P155708	Creg1
81	6626	22259	6625	5.52735	1.27014	0.229792	2.41185	0	A_52_P546421	Nr1h3
82	16364	76527	16363	5.5154	1.4917	0.27046	2.81219	0	A_51_P268234	Il34
83	4397	18173	4396	5.4903	1.453	0.264649	2.73777	0	A_51_P186476	Slc11a1
84	3755	16592	3754	5.45899	2.33469	0.427678	5.04443	0	A_51_P387764	Fabp5
85	1291	107094	1290	5.44887	1.19081	0.218543	2.28281	0	A_52_P527874	Rrp12
86	4705	19011	4704	5.44392	1.66973	0.306714	3.18155	0	A_51_P177965	Endou
87	13390	67486	13389	5.44137	2.0351	0.374005	4.09851	0	A_52_P405090	Polr3g
88	17098	93732	17097	5.43895	3.39675	0.624524	10.5323	0	A_51_P206708	Acox2
89	2831	13848	2830	5.4261	1.24338	0.229147	2.36752	0	A_51_P309850	Ephb6
90	10943	53415	10942	5.41673	1.64576	0.303829	3.12912	0	A_52_P515036	Htatip2
91	5782	212073	5781	5.4132	1.13788	0.210205	2.20058	0	A_51_P488910	4831426I19Rik
92	2891	140494	2890	5.40931	1.82554	0.337481	3.5444	0	A_52_P412167	Atp6v0a4
93	2202	12365	2201	5.38788	2.2608	0.419609	4.79259	0	A_51_P463159	Casp14
94	1780	11537	1779	5.35343	2.32675	0.434628	5.01675	0	A_51_P156955	Cfd
95	13969	68567	13968	5.3204	1.7426	0.327531	3.34637	0	A_51_P372550	Cgref1
96	14902	71584	14901	5.27565	2.35736	0.446837	5.1243	0	A_51_P355957	Gdpd2
97	3085	14381	3084	5.26733	1.45431	0.2761	2.74026	0	A_51_P187082	G6pdx
98	4531	18566	4530	5.26146	1.10996	0.21096	2.15839	0	A_51_P285736	Pdcd1
100	3180	14622	3179	5.2374	1.59932	0.305364	3.03	0	A_51_P385639	Gjb5
101	3658	16418	3657	5.22007	0.934501	0.179021	1.91123	0	A_52_P85864	Eif6
102	7735	235036	7734	5.2191	1.05843	0.202799	2.08266	0	A_51_P189985	Ppan
103	7803	235661	7802	5.21541	0.902334	0.173013	1.86909	0	A_51_P270286	Dync1li1
104	2199	12359	2198	5.20227	1.82836	0.351454	3.55132	0	A_52_P679769	Cat
105	3292	14862	3291	5.19897	3.03675	0.584106	8.20643	0	A_52_P415215	Gstm1
106	4871	19250	4870	5.15843	1.08093	0.209547	2.11541	0	A_51_P260433	Ptpn14
107	9836	320427	9835	5.13157	1.3296	0.259102	2.51333	0	A_51_P451986	A830021K08Rik
108	4587	18669	4586	5.13123	0.947545	0.184663	1.92859	0	A_52_P170509	Abcb1b
109	2832	13849	2831	5.12957	1.35782	0.264706	2.56298	0	A_52_P416072	Ephx1
110	8373	244152	8372	5.1215	1.34839	0.263281	2.54629	0	A_51_P219483	Tsku
111	2583	13090	2582	5.11295	1.09183	0.213542	2.13144	0	A_51_P352763	Cyp2b19
112	3380	15203	3379	5.08516	1.20057	0.236094	2.29831	0	A_51_P466270	Heph
113	10515	414105	10514	5.08115	1.91216	0.376325	3.76373	0	A_52_P489202	4732465J04Rik
114	15049	71916	15048	5.07715	1.25994	0.248159	2.39486	0	A_51_P487162	Dus4l
115	2428	12795	2427	5.06561	2.30332	0.454697	4.93592	0	A_51_P375201	Plk3
116	2344	12608	2343	5.05191	1.47215	0.291406	2.77436	0	A_52_P605846	Cebpb
117	7335	230673	7334	5.0495	1.20482	0.238603	2.30509	0	A_51_P365482	Ipo13
118	1292	107146	1291	5.04459	2.14107	0.424429	4.41089	0	A_51_P318856	Glyat
119	1666	11363	1665	5.03957	1.21527	0.241146	2.32185	0	A_51_P149455	Acadl
120	7715	234757	7714	5.03586	1.30229	0.258603	2.4662	0	A_51_P502092	BC024137
121	5752	211429	5751	5.01686	2.55773	0.509826	5.8878	0	A_51_P450750	Pla2g4b
122	2688	13448	2687	5.01064	0.85129	0.169896	1.80411	0	A_51_P275976	Dok1
123	8725	258713	8724	5.00774	1.79839	0.359122	3.47832	0	A_51_P480427	Olfr430
124	15008	71839	15007	4.99793	1.69032	0.338204	3.22729	0	A_52_P576854	Osgin1
125	1400	108114	1399	4.95351	1.75886	0.355074	3.38431	0	A_51_P395856	Slc22a7
126	16338	76459	16337	4.95326	1.25484	0.253336	2.38641	0	A_52_P646858	Car12
127	6811	224613	6810	4.94168	1.25078	0.253107	2.37969	0	A_52_P570652	Flywch1
128	8178	240916	8177	4.91414	1.51746	0.308795	2.86287	0	A_51_P402175	Vsig8
129	4561	18612	4560	4.91139	1.47868	0.301072	2.78694	0	A_51_P230382	Etv4
130	15841	74411	15840	4.91123	1.41839	0.288806	2.67287	0	A_51_P433026	Ppapdc2
132	16154	75704	16153	4.8801	3.30307	0.676845	9.87015	0	A_51_P342200	2310039D24Rik
133	17086	93695	17085	4.85332	1.46514	0.301884	2.7609	0	A_52_P417819	Gpnmb
134	16175	75750	16174	4.85056	2.17962	0.449355	4.53035	0	A_51_P173678	Slc10a6
136	4361	18104	4360	4.82098	3.21326	0.666516	9.27442	0	A_51_P424338	Nqo1
137	11849	60525	11848	4.81257	1.30438	0.271036	2.46978	0	A_51_P488399	Acss2
138	12137	63856	12136	4.80955	1.05383	0.219112	2.07604	0	A_51_P203710	Taf8
139	2230	12408	2229	4.78459	1.67679	0.350457	3.19716	0	A_52_P447375	Cbr1
140	5958	21418	5957	4.74685	1.17933	0.248446	2.26472	0	A_52_P205831	Tcfap2a
141	13419	67528	13418	4.73983	1.0987	0.231802	2.14162	0	A_52_P136914	Nudt7
142	3855	16889	3854	4.72696	1.28478	0.271799	2.43646	0	A_51_P459661	Lipa
143	7194	228775	7193	4.72257	1.65761	0.350998	3.15494	0	A_51_P331570	Trib3
144	12557	66447	12556	4.71221	0.963429	0.204454	1.94994	0	A_51_P253824	Mgst3
146	5564	20866	5563	4.703	1.04631	0.222478	2.06524	0	A_52_P363077	Stim1
147	14854	71390	14853	4.6964	1.43032	0.304557	2.69507	0	A_51_P500104	5430425J12Rik
148	904	100465	903	4.68831	1.1311	0.241259	2.19025	0	A_51_P362202	Mobkl2c
149	4209	17751	4208	4.66988	1.1281	0.24157	2.18571	0	A_52_P320971	Mt3
150	1908	11761	1907	4.66555	1.79988	0.38578	3.48191	0	A_51_P333111	Aox1
151	3290	14859	3289	4.66459	1.12	0.240107	2.17347	0	A_52_P432124	Gsta3
153	6054	215456	6053	4.62413	2.21663	0.479362	4.64806	0	A_51_P497768	Gpat2
154	14606	70439	14605	4.62188	0.858591	0.185766	1.81327	0	A_51_P257583	Taf15
155	16593	77573	16592	4.61613	0.777816	0.1685	1.71453	0	A_52_P123665	Vps33a
156	7689	234564	7688	4.61401	3.22672	0.699331	9.36137	0	A_51_P178772	AU018778
157	13336	67434	13335	4.60935	1.15253	0.250042	2.22303	0	A_52_P92121	Ankrd33b
158	9654	319673	9653	4.60771	0.973386	0.211252	1.96344	0	A_52_P292965	9330159M07Rik
159	3604	16188	3603	4.60633	0.842046	0.182802	1.79259	0	A_51_P432651	Il3ra
160	3606	16190	3605	4.60277	0.891806	0.193754	1.8555	0	A_51_P464478	Il4ra
161	3483	15482	3482	4.59551	1.47258	0.320438	2.77517	0	A_51_P340747	Hspa1l
162	16072	75475	16071	4.58206	0.94721	0.206721	1.92814	0	A_51_P378550	Oplah
163	1100	103988	1099	4.57214	0.944657	0.206612	1.92473	0	A_52_P66580	Gck
164	13726	67998	13725	4.56983	1.02619	0.224558	2.03664	0	A_52_P128935	Fam134c
165	1159	104816	1158	4.56846	1.26412	0.276706	2.4018	0	A_52_P338956	Aspg
166	15775	74251	15774	4.56117	1.19093	0.261102	2.283	0	A_52_P276529	Ankrd9
167	6660	22333	6659	4.53989	1.13507	0.250021	2.19629	0	A_51_P130459	Vdac1
168	2607	13144	2606	4.53499	0.722476	0.159311	1.65001	0	A_51_P493285	Dapk3
169	8135	24055	8134	4.52997	1.20048	0.265009	2.29816	0	A_51_P364632	Sh3bp2
170	3408	15275	3407	4.51664	1.49548	0.331103	2.81957	0	A_52_P9337	Hk1
171	10685	50492	10684	4.51506	1.05847	0.234432	2.08272	0	A_51_P344878	Thop1
172	5979	214424	5978	4.51415	1.77037	0.392183	3.41142	0	A_52_P206925	Parp16
174	1119	104183	1118	4.50071	1.34955	0.299853	2.54832	0	A_52_P428599	Chi3l4
175	10686	50493	10685	4.47839	0.929845	0.207629	1.90507	0	A_51_P320614	Txnrd1
176	2024	11964	2023	4.46929	0.959877	0.214772	1.94514	0	A_51_P357474	Atp6v1a
177	12833	66737	12832	4.468	0.909402	0.203537	1.87827	0	A_52_P273706	4921534H16Rik
178	3293	14863	3292	4.44444	1.52505	0.343136	2.87796	0	A_51_P284486	Gstm2
179	6802	22436	6801	4.4378	1.1416	0.257245	2.20626	0	A_52_P249965	Xdh
180	3558	16004	3557	4.43605	1.17611	0.265125	2.25967	0	A_51_P125467	Igf2r
181	2481	12877	2480	4.42921	0.987648	0.222985	1.98295	0	A_52_P462296	Cpeb1
182	5334	20539	5333	4.4149	0.844912	0.191378	1.79616	0	A_51_P273639	Slc7a5
183	5465	20762	5464	4.38255	1.90497	0.434672	3.74502	0	A_51_P124665	Sprr2h
184	1148	104681	1147	4.37372	0.958078	0.219053	1.94272	0	A_52_P579933	Slc16a6
185	1831	11655	1830	4.35726	1.259	0.288944	2.3933	0	A_52_P129756	Alas1
186	6066	215707	6065	4.35029	0.877735	0.201765	1.83749	0	A_52_P349356	Ccdc92
187	3221	14706	3220	4.33975	1.69732	0.391111	3.24298	0	A_52_P586821	Gng4
188	1837	11670	1836	4.33371	1.24225	0.286648	2.36567	0	A_51_P310594	Aldh3a1
189	933	100910	932	4.33085	0.774346	0.178797	1.71041	0	A_52_P479326	Chpf2
190	11770	59001	11769	4.33078	0.747046	0.172497	1.67835	0	A_51_P492087	Pole3
191	3294	14864	3293	4.32765	2.83818	0.655826	7.15119	0	A_51_P454949	Gstm3
192	1974	11848	1973	4.28812	1.08392	0.252772	2.11978	0	A_52_P428496	Rhoa
193	1627	110816	1626	4.25332	0.899377	0.211453	1.86526	0	A_51_P476129	Pwp2
194	7762	235330	7761	4.23416	1.39634	0.329779	2.63232	0	A_52_P327118	Ttc12
195	14598	70426	14597	4.2265	2.03046	0.480412	4.08536	0	A_51_P197645	Tekt5
198	9170	26971	9169	4.17684	1.66156	0.397802	3.16357	0	A_52_P114691	Pla2g2f
199	10550	432940	10549	4.16973	0.740287	0.177538	1.67051	0	A_51_P320539	Fam105b
200	3686	16470	3685	4.15083	1.20376	0.290006	2.3034	0	A_52_P678053	Ush1g
201	6035	215113	6034	4.14589	1.43079	0.345111	2.69595	0	A_52_P74368	Slc43a2
202	7312	230316	7311	4.14586	0.888616	0.214338	1.8514	0	A_52_P350012	Megf9
203	13138	67103	13137	4.14579	1.94091	0.468164	3.83948	0	A_51_P444437	Ptgr1
205	2294	12516	2293	4.13528	1.7474	0.42256	3.35754	0	A_51_P487555	Cd7
206	8129	240505	8128	4.1323	1.30371	0.315492	2.46863	0	A_52_P105765	Cdc42bpg
207	16895	80288	16894	4.12095	1.01942	0.247375	2.0271	0	A_51_P340668	Bcl9l
208	15808	74338	15807	4.10931	2.97534	0.724049	7.86443	0	A_51_P371214	Slc6a19
209	10431	385658	10430	4.10905	1.7528	0.42657	3.37011	0	A_52_P579411	Fam55c
210	10973	53761	10972	4.09429	1.07153	0.261714	2.10166	0	A_51_P485479	Bat2
211	4177	17474	4176	4.09422	1.89833	0.46366	3.7278	0	A_51_P383032	Clec4d
213	1880	11717	1879	4.07321	1.18825	0.291724	2.27877	0	A_51_P512801	Ampd3
214	15899	74568	15898	4.05818	1.07558	0.265039	2.10757	0	A_51_P440535	Mlkl
215	12226	64454	12225	4.05754	1.2604	0.310631	2.39562	0	A_51_P228971	Slc5a4b
216	2663	13393	2662	4.05555	1.45955	0.35989	2.75023	0	A_52_P503466	Dlx3
217	4800	19200	4799	4.03767	1.06085	0.262737	2.08616	0	A_51_P511315	Pstpip1
218	2342	12606	2341	4.03712	0.85643	0.212139	1.81055	0	A_52_P168567	Cebpa
219	9436	28169	9435	4.03666	0.755845	0.187245	1.68862	0	A_51_P425490	Agpat3
220	11604	57267	11603	4.0258	0.782512	0.194374	1.72012	0	A_51_P285960	Apba3
221	15489	73246	15488	4.00159	2.31648	0.578889	4.98115	0	A_51_P491916	Rassf6
222	6590	22184	6589	3.9963	0.876476	0.219322	1.83589	0	A_52_P1662	Zrsr2
224	14873	71461	14872	3.98348	1.04006	0.261093	2.05631	0	A_51_P496381	Ptk7
225	11646	57440	11645	3.97019	1.23593	0.311303	2.35534	0	A_51_P360918	Ehd3
226	7243	229487	7242	3.96557	0.859606	0.216767	1.81454	0	A_51_P397375	Pet112l
227	12217	64380	12216	3.9648	1.2183	0.30728	2.32673	0	A_51_P302977	Ms4a4c
228	12379	66168	12378	3.95308	1.20323	0.304377	2.30254	0	A_51_P200083	Grina
229	10097	329828	10096	3.94714	1.05976	0.268487	2.08458	0	A_51_P406557	AI464131
230	1074	103655	1073	3.94331	2.09991	0.532526	4.28684	0	A_51_P194853	Sec14l4
231	3295	14865	3294	3.93755	1.58615	0.402826	3.00247	0	A_51_P327585	Gstm4
233	6175	216850	6174	3.93221	0.864255	0.219788	1.8204	0	A_51_P122017	Kdm6b
234	9362	276829	9361	3.92034	1.4953	0.381422	2.81923	0	A_52_P395149	Smtnl2
235	9712	319945	9711	3.91645	0.835811	0.213411	1.78486	0	A_52_P356703	Flad1
236	4709	19015	4708	3.90839	1.01444	0.259554	2.02012	0	A_51_P271556	Ppard
237	10904	52858	10903	3.89358	0.934506	0.240012	1.91124	0	A_51_P408471	Cdipt
238	12649	66559	12648	3.89146	0.704204	0.180961	1.62925	0	A_51_P236464	Metapl1
239	7558	232947	7557	3.88704	0.72455	0.186401	1.65238	0	A_51_P127464	Lrrc68
240	17085	93694	17084	3.88113	1.06308	0.273909	2.08938	0	A_51_P324690	Clec2d
241	15785	74270	15784	3.87354	0.90842	0.234519	1.87699	0	A_52_P249664	Usp20
242	13777	68095	13776	3.86783	1.28047	0.331057	2.42919	0	A_51_P228193	Ociad1
243	1077	103710	1076	3.86601	0.962295	0.248912	1.94841	0	A_51_P268934	Slc35e4
244	11858	60599	11857	3.86483	0.998977	0.258479	1.99858	0	A_51_P175580	Trp53inp1
246	1116	104158	1115	3.85375	1.73868	0.451166	3.3373	0	A_51_P375969	Ces3
247	1888	11732	1887	3.85244	1.13367	0.294273	2.19416	0	A_51_P155152	Ank
248	9342	27406	9341	3.83787	0.831657	0.216697	1.77973	0	A_52_P438530	Abcf3
249	13137	67102	13136	3.80585	0.831132	0.218382	1.77908	0	A_51_P412732	D16Ertd472e
250	9453	29810	9452	3.80564	0.581395	0.152772	1.4963	0	A_52_P630059	Bag3
251	10661	442822	10660	3.80235	0.901083	0.236981	1.86747	0	A_51_P356241	9530085L02Rik
252	13658	67883	13657	3.79778	1.17635	0.309746	2.26004	0	A_52_P1140541	Uxs1
253	11013	54128	11012	3.79475	0.953751	0.251334	1.9369	0	A_51_P140901	Pmm2
255	4011	171231	4010	3.7855	0.593076	0.15667	1.50846	0	A_51_P182658	Vmn1r230
256	6607	22225	6606	3.76781	0.810533	0.21512	1.75386	0	A_51_P450632	Usp5
257	15691	74104	15690	3.75733	1.20699	0.321235	2.30855	0	A_51_P161342	Abcb6
258	15713	74137	15712	3.7547	1.06496	0.283634	2.09211	0	A_51_P504073	Nuak2
259	2797	13723	2796	3.7478	0.826543	0.220541	1.77343	0	A_51_P382849	Emb
262	3972	17085	3971	3.72936	1.15185	0.308859	2.22198	0	A_51_P497171	Ly9
263	6508	21952	6507	3.72912	1.25216	0.335778	2.38197	0	A_51_P435704	Tnni1
264	17095	93724	17094	3.72869	0.619012	0.166013	1.53582	0	A_52_P605253	Pcdhga12
265	14319	69556	14318	3.72817	0.742966	0.199285	1.67361	0	A_51_P317272	Bod1
267	12954	66859	12953	3.71594	0.968431	0.260615	1.95671	0	A_51_P493117	Slc16a9
268	10243	360013	10242	3.71437	0.698325	0.188006	1.62262	0	A_51_P396375	Myo18a
269	4761	19124	4760	3.70745	1.7773	0.479386	3.42784	0	A_51_P382152	Procr
270	14351	69656	14350	3.69032	1.32447	0.358904	2.50441	0	A_52_P339019	Pir
271	13986	68625	13985	3.67715	1.23983	0.337171	2.36171	0	A_52_P596789	Wdr65
272	7696	234669	7695	3.67689	1.56949	0.426852	2.968	0	A_51_P436567	BC015286
274	5737	211134	5736	3.66301	0.74	0.20202	1.67018	0	A_52_P341886	Lzts1
275	11662	57752	11661	3.66201	0.984011	0.268708	1.97796	0	A_51_P177392	Tacc2
276	10565	433323	10564	3.65962	1.59991	0.43718	3.03125	0	A_51_P267169	Sgpp2
277	10472	403171	10471	3.65531	0.739414	0.202285	1.6695	0	A_51_P241117	Banf2
278	6342	218030	6341	3.65079	0.728365	0.199509	1.65676	0	A_51_P148684	Pou6f2
279	9905	320692	9904	3.64764	1.2872	0.352885	2.44054	0	A_52_P561293	9430037G07Rik
280	1564	109934	1563	3.641	0.593597	0.163031	1.509	0	A_52_P184095	Abr
281	6298	217695	6297	3.63382	0.784729	0.215951	1.72277	0	A_51_P181746	Zfyve1
282	14445	69890	14444	3.62822	0.911493	0.251223	1.88099	0	A_51_P133870	Zfp219
283	5006	194744	5005	3.61933	1.14904	0.317472	2.21766	0	A_52_P532313	Slc25a43
285	1105	104079	1104	3.60174	1.17573	0.326433	2.25907	0	A_51_P254262	Nxph3
286	15701	74121	15700	3.59922	1.22944	0.341585	2.34476	0	A_51_P148280	Acoxl
287	11473	56491	11472	3.59663	0.600957	0.167089	1.51672	0	A_52_P556140	Vapb
288	14226	69253	14225	3.59552	1.25907	0.350177	2.39341	0	A_52_P222624	Hspb2
289	3956	170789	3955	3.59232	0.844365	0.235047	1.79547	0	A_51_P454078	Acot8
290	12946	66853	12945	3.59001	1.02101	0.284404	2.02934	0	A_52_P681771	Pnpla2
291	2413	12765	2412	3.58948	1.70422	0.47478	3.25852	0	A_51_P148602	Cxcr2
292	4207	17748	4206	3.58817	1.64135	0.457434	3.11958	0	A_51_P294979	Mt1
293	17070	93670	17069	3.56441	1.33004	0.373145	2.5141	0.088455	A_51_P474498	Tac4
295	4867	19246	4866	3.54225	0.821659	0.23196	1.76744	0.088455	A_51_P241705	Ptpn1
297	5469	20768	5468	3.53082	0.903324	0.25584	1.87037	0.088455	A_51_P418765	Sephs2
298	11790	59027	11789	3.52939	2.01686	0.571448	4.04702	0.088455	A_52_P535122	Nampt
299	4211	17754	4210	3.52766	0.671061	0.190228	1.59224	0.088455	A_52_P846109	Mtap1a
300	7826	236899	7825	3.52765	1.13763	0.322491	2.2002	0.088455	A_52_P135216	Pcyt1b
301	3917	170677	3916	3.52561	1.84856	0.524322	3.6014	0.088455	A_51_P173114	Cdhr1
302	4985	19383	4984	3.52464	0.692692	0.196529	1.6163	0.088455	A_51_P337246	Raly
303	2280	12499	2279	3.51694	1.4951	0.425114	2.81884	0.088455	A_51_P480046	Entpd5
304	5062	19734	5061	3.51433	0.960393	0.273279	1.94584	0.088455	A_51_P249286	Rgs16
305	17312	99738	17311	3.51092	0.89833	0.255868	1.86391	0.088455	A_51_P228706	Kcnc4
306	7953	23859	7952	3.50737	0.605469	0.172628	1.52147	0.088455	A_51_P297185	Dlg2
308	13571	67739	13570	3.50289	0.83947	0.239651	1.78939	0.088455	A_52_P528505	Slc48a1
309	4106	17254	4105	3.50099	1.48717	0.424785	2.80338	0.088455	A_51_P472901	Slc3a2
310	16184	75768	16183	3.50001	0.900652	0.257328	1.86691	0.088455	A_51_P237418	4833422M21Rik
311	12482	66341	12481	3.49412	0.970557	0.277769	1.9596	0.088455	A_51_P179461	Eid3
312	4269	17918	4268	3.49327	0.725201	0.2076	1.65313	0.088455	A_52_P635898	Myo5a
313	7809	236285	7808	3.48592	0.809276	0.232156	1.75233	0.088455	A_51_P358722	Lancl3
314	5792	212168	5791	3.48	0.953172	0.2739	1.93612	0.088455	A_52_P43503	Zswim4
315	6712	223697	6711	3.47848	0.691728	0.198859	1.61522	0.088455	A_51_P324124	Sun2
316	15484	73234	15483	3.47565	1.20488	0.346663	2.30518	0.088455	A_51_P383293	3110079O15Rik
318	16769	78611	16768	3.46492	0.625282	0.18046	1.54251	0.088455	A_52_P585165	Btbd19
319	6086	216049	6085	3.46463	1.05526	0.304581	2.07809	0.088455	A_51_P352216	Zfp365
320	10228	353156	10227	3.45476	0.69199	0.2003	1.61551	0.088455	A_52_P15122	Egfl7
322	9325	27380	9324	3.44497	0.796778	0.231287	1.73722	0.088455	A_51_P331809	Tcl1b4
323	3261	14787	3260	3.44362	1.70848	0.496127	3.26815	0.088455	A_52_P476795	Rhpn1
324	1345	107747	1344	3.43876	1.61319	0.469119	3.05927	0.088455	A_51_P504546	Aldh1l1
325	4174	17463	4173	3.43785	0.580523	0.168862	1.49539	0.088455	A_52_P676913	Psmd7
326	5417	20716	5416	3.43533	1.97614	0.575239	3.93438	0.088455	A_51_P159453	Serpina3n
328	1348	107765	1347	3.42904	1.00369	0.292704	2.00513	0.088455	A_52_P120803	Ankrd1
329	5899	213582	5898	3.4183	1.24359	0.363804	2.36787	0.088455	A_51_P250017	Mtap9
330	2913	140630	2912	3.41181	1.01517	0.297545	2.02114	0.088455	A_51_P150175	Ube4a
331	13853	68267	13852	3.40703	0.720194	0.211385	1.6474	0.088455	A_51_P447329	Slc25a22
332	12197	64143	12196	3.40606	0.796461	0.233837	1.73684	0.088455	A_52_P253004	Ralb
333	4028	171282	4027	3.40583	1.08206	0.317708	2.11705	0.088455	A_51_P396141	Acot4
334	8419	244895	8418	3.40324	0.881183	0.258925	1.84188	0.088455	A_52_P182866	C230081A13Rik
335	14102	68922	14101	3.39873	0.623643	0.183493	1.54076	0.088455	A_51_P331424	Dnaic1
336	13722	67993	13721	3.39867	0.97157	0.285868	1.96097	0.088455	A_51_P136441	Nudt12
337	13065	66993	13064	3.39294	0.745864	0.219828	1.67698	0.088455	A_51_P423880	Smarcd3
338	8912	26386	8911	3.38816	0.891379	0.263086	1.85495	0.088455	A_51_P345867	Hsf4
339	9186	269881	9185	3.38769	0.659071	0.194549	1.57907	0.088455	A_51_P377667	Map3k10
340	9587	319388	9586	3.38753	0.939866	0.277449	1.91835	0.088455	A_52_P646017	D230002A01Rik
341	10127	330286	10126	3.38695	0.913552	0.269727	1.88368	0.088455	A_51_P363214	D630045J12Rik
342	8049	23966	8048	3.38339	0.660394	0.195187	1.58051	0.088455	A_51_P473383	Odz4
343	15051	71920	15050	3.37574	2.28227	0.67608	4.86444	0.088455	A_51_P187491	Epgn
344	7949	23854	7948	3.3741	0.778372	0.230691	1.71519	0.088455	A_52_P29879	Def8
345	9476	29871	9475	3.37386	0.97731	0.289671	1.96879	0.088455	A_52_P499851	Scmh1
346	2880	140476	2879	3.37369	0.650766	0.192894	1.57	0.088455	A_51_P367901	Strc
19	1415	108176	1414	8.70183	1.83439	0.210805	3.56621	0
30	12648	665586	12647	7.97177	2.11672	0.265527	4.33706	0
37	12986	668830	12985	7.25441	1.84793	0.254732	3.59983	0
40	729	100047808	728	6.84736	1.64211	0.239816	3.12122	0
56	595	100046684	594	6.2041	1.37937	0.222333	2.60156	0
58	14678	70678	14677	6.07227	1.64565	0.271011	3.12888	0
66	11929	624275	11928	5.87876	1.43328	0.243806	2.70059	0
71	2760	13638	2759	5.77558	1.63662	0.283369	3.10936	0
73	739	100047868	738	5.73935	1.52874	0.266361	2.88533	0
77	310	100044207	309	5.6147	1.98037	0.352712	3.94595	0
99	12831	667353	12830	5.26045	1.09344	0.207861	2.13382	0
135	72	100039623	71	4.84906	0.994542	0.2051	1.99245	0
145	714	100047674	713	4.70842	1.13379	0.240801	2.19435	0
152	15642	73988	15641	4.65818	2.51053	0.538951	5.6983	0
173	63	100039358	62	4.51121	1.04774	0.232253	2.06729	0
196	10569	433463	10568	4.22011	1.97928	0.469012	3.94297	0
197	15891	74548	15890	4.20963	1.30206	0.309306	2.46581	0
204	12029	630896	12028	4.14097	1.21287	0.292895	2.31798	0
212	165	100041907	164	4.09095	1.07333	0.262368	2.10429	0
223	12127	637970	12126	3.98879	1.20918	0.303145	2.31206	0
232	1095	103880	1094	3.93736	0.86427	0.219505	1.82042	0
245	153	100041503	152	3.86142	0.91088	0.235893	1.88019	0
254	62	100039354	61	3.78552	1.1794	0.311555	2.26482	0
260	12728	666284	12727	3.74014	0.821908	0.219753	1.76774	0
261	13404	675010	13403	3.73887	1.00604	0.269077	2.0084	0
266	685	100047450	684	3.7267	0.739317	0.198384	1.66939	0
273	13252	672857	13251	3.66306	0.726714	0.19839	1.65487	0
284	10625	434585	10624	3.60675	0.700915	0.194334	1.62554	0
294	791	100048307	790	3.55819	0.988079	0.277691	1.98354	0.088455
307	529	100046035	528	3.50372	0.978405	0.279247	1.97029	0.088455
317	544	100046186	543	3.47053	1.18563	0.341628	2.27462	0.088455
321	628	100046995	627	3.44829	0.764363	0.221664	1.69862	0.088455
327	10548	432817	10547	3.43196	1.59263	0.464059	3.01599	0.088455
35A vs.35C down
	Row	Gene ID	Score(d)	Numerator(r)	Denominator(s+s0)	Fold Change	q-value(%)	ProbeID		GeneSymbol
1	4052	17153	-16.4283	-3.74276	0.227824	0.0746995	0	A_51_P499071		Mal
2	16605	77596	-10.4676	-3.23299	0.308857	0.106359	0	A_52_P566840		Gpr110
4	8071	23985	-9.978	-2.95868	0.29652	0.128632	0	A_51_P224164		Slc26a4
5	15845	74424	-9.44471	-3.1329	0.33171	0.113999	0	A_51_P318755		Tmc5
6	5144	20197	-9.12558	-2.55145	0.279594	0.170583	0	A_51_P468456		S100a3
7	9098	269181	-9.06168	-1.90141	0.20983	0.267682	0	A_52_P496924		Mgat4a
8	16839	78896	-8.94289	-2.31069	0.258383	0.201564	0	A_51_P404463		1500015O10Rik
9	8895	26367	-8.55654	-2.26627	0.264858	0.207867	0	A_52_P9671		Ceacam2
10	6145	216643	-8.54088	-3.41539	0.399887	0.0937273	0	A_52_P184609		Gabrp
11	12892	66805	-8.14708	-3.81705	0.468517	0.0709503	0	A_51_P333923		Tspan1
12	5613	209086	-7.55801	-2.01744	0.266928	0.246996	0	A_51_P427383		Samd9l
13	2716	13522	-7.54459	-1.50803	0.199883	0.35159	0	A_52_P227469		Adam28
14	1466	108956	-7.4554	-2.95109	0.395832	0.129311	0	A_52_P407171		Apol7c
15	2878	140474	-7.30613	-2.56737	0.3514	0.168711	0	A_52_P458219		Muc4
16	11347	56277	-7.28169	-1.8386	0.252496	0.279593	0	A_51_P288876		Tmem45a
17	1851	11685	-7.24839	-2.4214	0.33406	0.186675	0	A_51_P471659		Alox12e
18	6630	22270	-7.22702	-2.50481	0.34659	0.176188	0	A_52_P461343		Upk3a
19	3055	14302	-6.98374	-1.54154	0.220733	0.343518	0	A_52_P357469		Frk
20	8	100034684	-6.87383	-2.0531	0.298684	0.240965	0	A_52_P487686		BC100530
21	2875	14038	-6.85136	-3.20692	0.468071	0.108298	0	A_51_P246166		Expi
22	2399	12739	-6.80791	-2.75254	0.404314	0.14839	0	A_51_P157902		Cldn3
23	2455	12830	-6.71849	-1.58458	0.235854	0.333421	0	A_51_P216005		Col4a5
24	15852	74442	-6.66833	-1.83281	0.274853	0.280717	0	A_51_P187346		Sgms2
25	11296	56078	-6.65309	-2.33111	0.350381	0.19873	0	A_51_P243963		Car5b
26	12344	66102	-6.56092	-1.56484	0.238509	0.338016	0	A_52_P99888		Cxcl16
27	2790	13710	-6.55789	-1.91902	0.292627	0.264435	0	A_51_P480241		Elf3
28	8914	26388	-6.54709	-1.70182	0.259935	0.307399	0	A_51_P151182		Ifi202b
29	15764	74229	-6.49827	-2.10126	0.323357	0.233054	0	A_51_P422540		Paqr8
30	16556	77296	-6.21609	-2.7349	0.43997	0.150215	0	A_51_P103594		Fam162b
31	10697	50528	-6.18974	-1.86217	0.300847	0.275063	0	A_51_P457306		Tmprss2
33	2977	14160	-6.06927	-1.88076	0.309883	0.27154	0	A_51_P218091		Lgr5
34	9312	27359	-6.05313	-1.04747	0.173046	0.483816	0	A_51_P417998		Sytl4
37	8024	239447	-5.91357	-2.18771	0.369947	0.2195	0	A_51_P144160		Colec10
38	14273	69428	-5.89925	-2.16587	0.367144	0.222847	0	A_51_P225493		1700016C15Rik
39	16293	76279	-5.85974	-3.1916	0.544667	0.109454	0	A_51_P120295		Cyp2d26
40	15898	74562	-5.83016	-1.88919	0.324037	0.269959	0	A_51_P513515		Fer1l4
41	4819	19216	-5.80175	-1.56838	0.270329	0.337187	0	A_51_P144303		Ptger1
42	16978	81879	-5.74663	-1.16539	0.202796	0.445843	0	A_52_P20867		Tcfcp2l1
43	6381	218311	-5.73493	-1.52473	0.265867	0.347545	0	A_51_P310862		Zfp455
44	3157	14583	-5.66345	-1.10579	0.19525	0.464649	0	A_52_P479435		Gfpt1
46	14784	71091	-5.61311	-1.17262	0.208908	0.443613	0	A_51_P234140		Cdkl1
47	4877	19260	-5.61191	-2.85753	0.50919	0.137974	0	A_51_P483324		Ptpn22
50	15848	74430	-5.52015	-1.53294	0.277698	0.345573	0	A_51_P295896		4930452B06Rik
51	17304	99586	-5.50005	-1.62212	0.294928	0.324858	0	A_51_P473259		Dpyd
52	7427	231507	-5.45207	-1.62327	0.297736	0.324598	0	A_51_P515883		Plac8
53	5908	213742	-5.43426	-3.23554	0.595396	0.106171	0	A_52_P113537		Xist
55	11654	57738	-5.37354	-2.18695	0.406985	0.219616	0	A_51_P267278		Slc15a2
56	3244	14758	-5.36752	-1.19463	0.222566	0.436899	0	A_52_P440260		Gpm6b
57	2595	13119	-5.33685	-1.88978	0.3541	0.269849	0	A_51_P238576		Cyp4a14
58	1868	11699	-5.32206	-3.15199	0.592251	0.112501	0	A_51_P145785		Ambp
59	10974	53791	-5.30848	-2.15686	0.406304	0.224244	0	A_51_P461123		Tlr5
60	12098	635702	-5.26945	-1.28692	0.244222	0.409826	0	A_52_P681557		Naaladl2
61	2317	12552	-5.26434	-1.46885	0.279018	0.361271	0	A_51_P506204		Cdh11
62	1942	11807	-5.26321	-2.84235	0.540041	0.139434	0	A_51_P128973		Apoa2
63	3600	16182	-5.17012	-2.43681	0.471326	0.184691	0	A_51_P505617		Il18r1
64	3883	16981	-5.15882	-1.40179	0.271727	0.378458	0	A_52_P146719		Lrrn3
65	1833	11658	-5.11318	-1.25894	0.246214	0.417852	0	A_51_P359272		Alcam
66	4463	18383	-5.1125	-2.13009	0.416643	0.228444	0	A_52_P106620		Tnfrsf11b
67	13610	67801	-5.09357	-2.27227	0.446105	0.207004	0	A_51_P154867		Pllp
68	6777	224116	-5.0927	-3.49961	0.687181	0.0884125	0	A_51_P211506		Muc20
69	16595	77577	-5.08494	-2.68482	0.527994	0.155521	0	A_52_P228277		Spns3
70	16179	75761	-5.06689	-1.52591	0.301153	0.347261	0	A_52_P360742		Apol7a
71	10740	50798	-5.05771	-1.08932	0.215378	0.469984	0	A_51_P275623		Gne
72	13431	67547	-5.03496	-1.48441	0.29482	0.357396	0	A_52_P485939		Slc39a8
73	14901	71583	-5.00039	-1.00955	0.201894	0.496701	0	A_52_P499028		9130008F23Rik
74	14730	70835	-4.98875	-1.29655	0.259895	0.407098	0	A_51_P363258		Prss22
75	1548	109731	-4.96389	-1.53957	0.310154	0.343987	0	A_51_P302566		Maob
76	5583	208820	-4.96379	-0.997939	0.201044	0.500715	0	A_51_P296878		Gm11818
77	1815	11611	-4.91121	-1.96782	0.400679	0.255639	0	A_51_P469789		Agxt
78	5272	20443	-4.85468	-1.61117	0.331879	0.327334	0	A_51_P135137		St3gal4
79	11754	58860	-4.84695	-2.1744	0.448611	0.221535	0	A_51_P164296		Adamdec1
80	2219	12393	-4.84649	-1.39693	0.288236	0.379735	0	A_52_P460545		Runx2
81	6792	22419	-4.83849	-1.3879	0.286846	0.38212	0	A_51_P137991		Wnt5b
82	4666	18816	-4.82976	-2.42497	0.50209	0.186213	0	A_51_P174176		Serpinf2
83	4898	19273	-4.81114	-1.36561	0.283844	0.388069	0	A_52_P459168		Ptpru
84	1170	105005	-4.75787	-1.40346	0.294976	0.378022	0	A_51_P423709		Fam84a
85	16358	76509	-4.75486	-1.76154	0.370472	0.294933	0	A_51_P131561		1600029D21Rik
86	3349	15109	-4.72689	-2.0855	0.441199	0.235615	0	A_51_P172155		Hal
87	3074	14362	-4.69946	-1.18391	0.251925	0.440156	0	A_52_P597634		Fzd1
88	8212	24136	-4.69399	-0.869412	0.185218	0.54737	0	A_52_P526372		Zeb2
89	2749	13615	-4.69358	-2.09723	0.446829	0.233707	0	A_51_P482121		Edn2
90	7137	22779	-4.6729	-1.49397	0.319709	0.355035	0	A_52_P413515		Ikzf2
91	8141	24060	-4.64687	-1.5376	0.330889	0.344459	0	A_51_P514421		Slc35a1
92	1941	11806	-4.64501	-1.80822	0.389282	0.285543	0	A_51_P408082		Apoa1
93	5659	20955	-4.62775	-1.04768	0.226391	0.483745	0	A_51_P364421		Vamp7
94	2169	12314	-4.61608	-1.33132	0.288409	0.397405	0	A_51_P185971		Calm2
95	10962	53614	-4.61219	-0.95622	0.207324	0.515406	0	A_51_P271887		Reck
96	12352	66113	-4.59709	-1.31696	0.286478	0.401379	0	A_52_P292404		Apoa5
97	10277	380855	-4.58029	-0.976304	0.213153	0.50828	0	A_51_P132081		Rsl1
98	8422	244954	-4.56503	-1.53811	0.336934	0.344336	0	A_51_P420600		Prss35
99	11837	60364	-4.56057	-0.740212	0.162307	0.598651	0	A_51_P505169		Donson
100	6324	217845	-4.55735	-1.32519	0.290781	0.399096	0	A_51_P391432		Ifi27l2b
101	5028	19662	-4.5267	-2.95498	0.652789	0.128962	0	A_51_P374752		Rbp4
102	4287	17940	-4.51419	-1.81632	0.402358	0.283944	0	A_51_P289392		Naip1
103	17309	99681	-4.50812	-1.66631	0.369623	0.315059	0	A_52_P200643		Tchh
105	11129	545260	-4.46992	-1.45107	0.324629	0.365751	0	A_51_P384136		Arsi
106	17303	99571	-4.46348	-3.27068	0.732765	0.103616	0	A_51_P362176		Fgg
107	15558	73608	-4.45494	-1.63104	0.36612	0.322855	0	A_52_P135282		Marveld3
108	2800	13730	-4.43614	-1.5821	0.356639	0.333995	0	A_52_P120037		Emp1
109	12866	66775	-4.42391	-0.86511	0.195553	0.549004	0	A_51_P463120		Ptplad2
110	6366	218214	-4.42005	-0.727907	0.164683	0.603779	0	A_51_P111245		Kdm1b
111	9875	320589	-4.41819	-1.34571	0.304583	0.393462	0	A_52_P461786		9530020O07Rik
112	2827	13841	-4.39194	-1.33259	0.303418	0.397053	0	A_52_P504787		Epha7
114	2602	13136	-4.39022	-1.2846	0.292605	0.410485	0	A_52_P136303		Cd55
115	120	100040792	-4.37764	-1.50842	0.344573	0.351497	0	A_52_P74229		Gm11627
116	14684	70691	-4.37572	-1.00477	0.229624	0.498349	0	A_52_P417978		3830403N18Rik
117	10838	52428	-4.37247	-2.49154	0.569825	0.177816	0	A_52_P287937		Rhpn2
119	15566	73649	-4.35723	-1.14295	0.262311	0.452833	0	A_52_P681592		Cybrd1
120	8273	242594	-4.3231	-1.64109	0.379611	0.320613	0	A_52_P319552		1700024P16Rik
121	11010	54123	-4.32041	-1.58084	0.365902	0.334286	0	A_51_P421876		Irf7
122	2791	13711	-4.31011	-1.28282	0.297631	0.410991	0	A_51_P455866		Elf5
124	6266	217379	-4.29754	-0.850326	0.197863	0.554659	0	A_51_P400040		Ubxn2a
125	2842	13865	-4.28048	-1.24189	0.290128	0.42282	0	A_52_P275700		Nr2f1
126	7617	233752	-4.27985	-0.982604	0.229588	0.506066	0	A_52_P233411		Insc
127	2180	12331	-4.2792	-1.26608	0.295868	0.415788	0	A_51_P440682		Cap1
128	16923	80797	-4.27773	-1.98989	0.465174	0.251758	0	A_51_P265806		Clca2
130	14912	71619	-4.26889	-2.12458	0.49769	0.229317	0	A_51_P460851		Arl14
132	7044	22700	-4.25714	-1.15042	0.270233	0.450493	0	A_51_P381440		Zfp40
133	10689	50498	-4.25533	-1.56387	0.367509	0.338243	0	A_51_P202633		Ebi3
134	7663	234258	-4.25399	-1.07741	0.25327	0.473879	0	A_51_P319986		Neil3
135	2095	12140	-4.24319	-1.5416	0.363311	0.343505	0	A_51_P290074		Fabp7
136	10279	380863	-4.23647	-1.73145	0.408701	0.301149	0	A_52_P799815		Tmem171
137	3971	17084	-4.22921	-1.30206	0.307873	0.405547	0	A_51_P465350		Ly86
138	3304	14894	-4.22363	-0.717976	0.16999	0.60795	0	A_51_P108489		Gtl3
139	7517	232441	-4.21288	-1.89821	0.450573	0.268276	0	A_51_P305508		Rerg
140	3869	16948	-4.20286	-0.967465	0.230192	0.511404	0	A_51_P300493		Lox
141	4417	18212	-4.19107	-1.2295	0.293362	0.426465	0	A_51_P393454		Ntrk2
142	11714	58210	-4.17698	-1.39179	0.333204	0.381093	0	A_51_P317882		Sectm1b
143	13357	67454	-4.17289	-0.805538	0.193041	0.572149	0	A_51_P152404		Ikbip
144	9913	320712	-4.16635	-1.50497	0.361219	0.352338	0	A_51_P358037		Abi3bp
145	10826	52250	-4.16435	-0.94284	0.226407	0.520208	0	A_51_P508341		Reep1
146	2217	12390	-4.15836	-0.904229	0.217449	0.534318	0	A_51_P279552		Cav2
147	8286	242700	-4.1565	-0.669441	0.161059	0.62875	0	A_52_P621588		Il28ra
148	11468	56485	-4.1496	-1.11259	0.268119	0.462464	0	A_51_P514405		Slc2a5
150	15332	72640	-4.10845	-0.767602	0.186835	0.587393	0	A_52_P706060		Mex3a
151	13317	67416	-4.09679	-1.30944	0.319626	0.403477	0	A_51_P356512		Armcx2
152	14172	69099	-4.095	-0.69555	0.169854	0.617474	0	A_52_P255724		1810009N02Rik
153	6487	21926	-4.08451	-1.38001	0.337865	0.384215	0	A_51_P385099		Tnf
154	8388	244416	-4.06643	-0.966576	0.237697	0.511719	0	A_51_P138933		Ppp1r3b
155	7740	235047	-4.0632	-1.02314	0.251807	0.492043	0	A_52_P68477		Zfp809
156	16672	77994	-4.06003	-0.758151	0.186735	0.591254	0	A_52_P72546		2810055G20Rik
157	6432	218772	-4.0468	-1.16636	0.288219	0.445543	0	A_51_P202440		Rarb
158	2093	12124	-4.04559	-1.04565	0.258467	0.484426	0	A_51_P117794		Bik
159	8303	242939	-4.04316	-1.22791	0.3037	0.426936	0	A_51_P255675		Cpz
160	1948	11818	-4.04299	-3.69076	0.912878	0.0774412	0	A_51_P342387		Apoh
161	3776	16660	-4.04122	-1.79033	0.443017	0.289106	0	A_51_P304200		Krt31
162	2354	12628	-4.03385	-1.16816	0.28959	0.444987	0	A_52_P601727		Cfh
163	10545	432769	-4.03368	-1.03894	0.257566	0.486686	0	A_52_P578085		Zfp708
164	2101	12159	-4.01576	-0.892083	0.222145	0.538836	0	A_51_P383741		Bmp4
165	14677	70676	-4.00737	-1.37571	0.343295	0.385363	0	A_52_P479522		Gulp1
166	7441	231655	-3.99989	-2.04053	0.510146	0.243074	0	A_51_P437309		Oasl1
167	2597	13123	-3.99463	-0.920326	0.230391	0.52839	0	A_51_P461429		Cyp7b1
168	9235	27052	-3.99433	-0.948573	0.23748	0.518145	0	A_51_P517105		Aoah
169	17109	93761	-3.98757	-1.00358	0.251676	0.498763	0	A_52_P283041		Smarca1
170	2114	12182	-3.98576	-1.38382	0.347192	0.383202	0	A_51_P499838		Bst1
171	4382	18133	-3.97944	-1.34283	0.337442	0.394246	0	A_52_P105537		Nov
172	8986	26568	-3.97672	-1.02007	0.25651	0.493093	0	A_51_P133252		Slc27a3
173	2278	12496	-3.95713	-0.664956	0.16804	0.630708	0	A_51_P112932		Entpd2
174	1816	11622	-3.95167	-0.914385	0.231392	0.53057	0	A_51_P449133		Ahr
175	10997	53906	-3.95151	-1.44635	0.366024	0.366949	0	A_52_P313318		Phgr1
176	13323	67420	-3.94909	-0.595244	0.150729	0.661932	0	A_52_P112791		Far1
177	3542	15953	-3.9467	-1.02856	0.260614	0.490198	0	A_51_P129229		Ifi47
178	13410	67510	-3.94234	-0.650826	0.165086	0.636916	0	A_51_P287206		Fam18b
180	4760	19123	-3.92924	-2.71198	0.690205	0.15262	0	A_51_P295967		Proc
181	871	100102	-3.92586	-0.830605	0.211573	0.562293	0	A_51_P397673		Pcsk9
182	1767	11513	-3.91881	-0.923755	0.235724	0.527135	0	A_51_P441622		Adcy7
183	14332	69590	-3.91756	-0.860913	0.219757	0.550604	0	A_51_P495232		Gpx8
185	8173	24088	-3.90112	-0.856783	0.219625	0.552182	0	A_51_P452629		Tlr2
186	2813	13809	-3.89341	-1.2064	0.309856	0.43335	0	A_51_P161830		Enpep
187	7742	235050	-3.89156	-1.08222	0.278093	0.472303	0	A_51_P328883		Zfp810
188	16648	77862	-3.88872	-0.777234	0.199869	0.583484	0	A_51_P323620		Thyn1
189	16220	75974	-3.8801	-0.853281	0.219912	0.553525	0	A_52_P638732		Dock11
190	3191	14658	-3.87342	-1.33074	0.343558	0.397563	0	A_51_P250797		Glrb
191	9155	269633	-3.8667	-0.946587	0.244805	0.518859	0	A_51_P372456		Wdr86
192	467	100045515	-3.85722	-1.59701	0.414032	0.330561	0	A_52_P236398		LOC100045515
193	6615	22239	-3.85394	-1.14365	0.296747	0.452615	0	A_52_P439263		Ugt8a
194	7545	232878	-3.84721	-0.794576	0.206533	0.576512	0	A_51_P485410		Zscan22
195	5660	209558	-3.84709	-1.63986	0.42626	0.320887	0	A_51_P332917		Enpp3
196	7240	229445	-3.84532	-0.860522	0.223784	0.550753	0	A_52_P317043		Ctso
197	4741	19075	-3.83887	-0.936163	0.243864	0.522621	0	A_51_P168632		Prim1
198	7837	237175	-3.83671	-1.05463	0.274878	0.481421	0	A_52_P549184		Gpr64
199	14996	71816	-3.83548	-1.6262	0.423989	0.32394	0	A_51_P215530		Rnf180
200	16855	78934	-3.81652	-0.94414	0.247383	0.519739	0	A_52_P148972		4930581F22Rik
201	5882	213469	-3.8165	-0.921817	0.241535	0.527844	0	A_51_P356967		Lgi3
202	16427	76770	-3.80246	-1.56312	0.41108	0.338419	0	A_51_P105380		2010005H15Rik
203	3010	14226	-3.78764	-0.955955	0.252388	0.5155	0	A_51_P293781		Fkbp1b
204	15034	71888	-3.78264	-2.17906	0.576069	0.220819	0	A_51_P204350		Krt33a
205	9490	30060	-3.77549	-2.22967	0.590564	0.213208	0	A_51_P324351		Mfi2
206	6469	219131	-3.76953	-1.45531	0.386072	0.364677	0	A_51_P262515		Phf11
207	2358	12638	-3.76947	-1.4286	0.378991	0.371492	0	A_51_P305896		Cftr
208	16843	78906	-3.76058	-1.8364	0.488328	0.280021	0	A_51_P408227		9130017N09Rik
209	5230	20363	-3.75329	-1.53365	0.408615	0.345403	0	A_51_P470328		Sepp1
210	8032	239546	-3.75156	-0.79249	0.211243	0.577347	0	A_51_P469252		Zfp647
211	16537	77117	-3.74978	-1.21566	0.324194	0.430577	0	A_52_P672351		6720457D02Rik
213	14084	68874	-3.74621	-0.729976	0.194857	0.602914	0	A_51_P479352		Klhdc9
214	1898	11754	-3.74336	-1.01043	0.269925	0.4964	0	A_51_P378051		Aoc3
215	2910	14061	-3.74124	-1.745	0.466422	0.298334	0	A_51_P480311		F2
216	1460	108927	-3.73692	-1.33474	0.357176	0.396464	0	A_51_P505868		Lhfp
217	1693	114301	-3.73421	-0.850102	0.227652	0.554745	0	A_51_P171883		Palmd
218	4438	18300	-3.72775	-1.20753	0.323931	0.433009	0	A_51_P113588		Oit1
219	4982	19378	-3.7247	-1.19883	0.321859	0.435629	0	A_52_P58145		Aldh1a2
220	9344	27409	-3.72063	-1.57149	0.422373	0.33646	0	A_51_P256902		Abcg5
221	3066	14345	-3.71289	-1.17857	0.317426	0.441789	0	A_52_P200458		Fut4
222	16505	77015	-3.71227	-0.887678	0.23912	0.540483	0	A_52_P408025		Mpped2
223	4552	18599	-3.69847	-1.48219	0.400757	0.357946	0	A_51_P439403		Padi1
224	16394	76633	-3.68288	-0.642504	0.174457	0.6406	0	A_51_P346874		1700112E06Rik
225	9551	319190	-3.66783	-0.983216	0.268065	0.505851	0.088455	A_51_P430071		Hist2h2be
226	10935	53378	-3.66472	-0.73662	0.201003	0.600144	0.088455	A_52_P440347		Sdcbp
227	12406	66206	-3.65452	-0.679351	0.185894	0.624446	0.088455	A_51_P490348		1110059E24Rik
228	5406	20687	-3.65375	-0.76055	0.208156	0.590271	0.088455	A_52_P368339		Sp3
229	3652	16410	-3.6508	-0.858661	0.235198	0.551464	0.088455	A_52_P86872		Itgav
230	3567	16019	-3.64419	-0.894824	0.245548	0.537813	0.088455	A_52_P358360		Igh-6
231	3481	15476	-3.64219	-1.10357	0.302995	0.465365	0.088455	A_51_P365152		Hs3st1
232	7997	239157	-3.63449	-0.798199	0.219618	0.575067	0.088455	A_52_P596595		Pnma2
233	9462	29820	-3.63006	-0.820995	0.226165	0.566051	0.088455	A_52_P7593		Tnfrsf19
234	3322	14961	-3.62163	-1.00567	0.277683	0.49804	0.088455	A_51_P215237		H2-Ab1
235	2164	12306	-3.61751	-0.76567	0.211656	0.58818	0.088455	A_51_P165342		Anxa2
236	10395	382423	-3.61748	-0.602264	0.166487	0.658719	0.088455	A_52_P180499		Atxn7l3b
237	2430	12797	-3.61403	-1.49708	0.414241	0.354269	0.088455	A_51_P350817		Cnn1
238	3345	15081	-3.61296	-0.773148	0.213993	0.585139	0.088455	A_51_P164667		H3f3b
239	6408	218518	-3.61004	-0.744996	0.206368	0.59667	0.088455	A_52_P532323		Marveld2
240	6315	21778	-3.60991	-0.75759	0.209864	0.591484	0.088455	A_52_P11367		Tex9
241	9444	28253	-3.60046	-1.68455	0.467869	0.311101	0.088455	A_51_P140803		Slco1b2
242	10727	50781	-3.5964	-1.11093	0.308901	0.462995	0.088455	A_52_P220176		Dkk3
243	11580	56847	-3.58677	-1.59252	0.443998	0.331592	0.088455	A_52_P113518		Aldh1a3
245	11549	56744	-3.58199	-0.984585	0.274871	0.505371	0.088455	A_51_P441426		Pf4
246	1801	11576	-3.5803	-3.20213	0.894374	0.108658	0.088455	A_51_P510891		Afp
247	9245	270624	-3.56933	-1.33043	0.37274	0.397649	0.088455	A_52_P159034		Spin4
248	14698	70747	-3.56574	-0.912729	0.255972	0.531179	0.088455	A_51_P394394		Tspan2
249	2221	12395	-3.5631	-1.01786	0.285667	0.493848	0.088455	A_52_P612137		Runx1t1
250	5240	20383	-3.56225	-0.860681	0.241611	0.550693	0.088455	A_51_P417016		Srsf3
251	7622	233806	-3.56147	-0.90258	0.253429	0.534929	0.088455	A_51_P435348		Tmem159
252	9216	27015	-3.55996	-0.683876	0.192102	0.622491	0.088455	A_52_P460095		Polk
253	3034	14264	-3.55919	-1.19613	0.336068	0.436445	0.088455	A_51_P207622		Fmod
254	3427	15375	-3.5573	-1.02612	0.288453	0.49103	0.088455	A_51_P417643		Foxa1
255	5061	19733	-3.55418	-1.61365	0.454015	0.32677	0.088455	A_51_P157462		Rgn
256	5687	209837	-3.55332	-1.2123	0.341174	0.43158	0.088455	A_51_P400269		Slc38a5
257	2590	13112	-3.55009	-1.15458	0.325225	0.449198	0.088455	A_51_P355301		Cyp3a11
258	9667	319739	-3.54406	-0.951267	0.268411	0.517178	0.088455	A_52_P250433		B230303O12Rik
259	1423	108672	-3.53854	-0.798279	0.225596	0.575035	0.088455	A_51_P405375		Zdhhc15
260	6106	216225	-3.53787	-2.55709	0.722777	0.169918	0.088455	A_51_P107315		Slc5a8
261	1730	114679	-3.53388	-0.63658	0.180136	0.643236	0.088455	A_52_P357133		Selm
262	2963	14129	-3.53263	-0.823311	0.233059	0.565144	0.088455	A_52_P47846		Fcgr1
263	4873	19253	-3.53256	-1.2796	0.36223	0.41191	0.088455	A_51_P236118		Ptpn18
264	10700	50706	-3.53224	-1.55619	0.440568	0.340048	0.088455	A_51_P489192		Postn
265	17120	93843	-3.5242	-0.722931	0.205133	0.605865	0.088455	A_51_P270324		Pnck
266	1431	108699	-3.52327	-0.82867	0.235199	0.563048	0.088455	A_52_P118310		Chn1
267	15038	71893	-3.52082	-1.42428	0.404531	0.372605	0.088455	A_52_P625940		Noxo1
268	13196	67198	-3.51169	-0.912739	0.259915	0.531176	0.088455	A_51_P202911		Spats2l
269	1523	109323	-3.50676	-0.762244	0.217364	0.589579	0.088455	A_51_P221072		C1qtnf7
270	15522	73385	-3.50351	-0.730097	0.20839	0.602863	0.088455	A_52_P252305		1700047I17Rik1
271	17282	99151	-3.50164	-0.828084	0.236484	0.563277	0.088455	A_52_P559545		Cercam
272	2316	12550	-3.4975	-0.996395	0.284887	0.501251	0.088455	A_51_P137336		Cdh1
274	3359	15139	-3.49094	-2.77822	0.795837	0.145772	0.088455	A_51_P155323		Hc
275	6181	216867	-3.48667	-1.35901	0.389774	0.389849	0.088455	A_51_P489720		Slc16a11
276	11755	58861	-3.48507	-1.26265	0.362303	0.416778	0.088455	A_52_P82488		Cysltr1
277	12659	66573	-3.48401	-0.755657	0.216893	0.592276	0.088455	A_52_P196458		Dzip1
278	13503	67654	-3.4831	-1.38913	0.398822	0.381794	0.088455	A_52_P246992		4930558C23Rik
279	7877	237823	-3.48043	-0.618184	0.177617	0.651491	0.088455	A_52_P599624		Pfas
280	1041	102871	-3.4751	-0.981982	0.282577	0.506284	0.088455	A_51_P374878		D330045A20Rik
281	7897	23795	-3.47148	-1.84912	0.53266	0.277561	0.088455	A_51_P209122		Agr2
282	14100	68918	-3.46867	-0.656642	0.189306	0.634353	0.088455	A_51_P234044		1190005I06Rik
283	14419	69814	-3.46446	-1.45666	0.420458	0.364336	0.088455	A_52_P344601		Prss32
284	5606	209027	-3.45816	-0.779615	0.225442	0.582522	0.088455	A_51_P503896		Pycr1
285	2993	14184	-3.45745	-1.03664	0.299829	0.48746	0.088455	A_52_P506516		Fgfr3
286	7922	238276	-3.45578	-1.74591	0.505213	0.298146	0.088455	A_52_P1042732		Akap5
287	7025	226866	-3.44918	-0.707833	0.205217	0.612239	0.088455	A_52_P22611		Gm106
288	961	101488	-3.44403	-0.662646	0.192404	0.631719	0.088455	A_52_P255782		Slco2b1
289	10294	381066	-3.4437	-0.946791	0.274934	0.518785	0.088455	A_52_P317923		BC049807
290	14630	70536	-3.4422	-1.27141	0.369361	0.414254	0.088455	A_51_P497295		Qpct
291	4665	18815	-3.44075	-2.71094	0.787892	0.15273	0.088455	A_51_P267836		Plg
292	2931	14080	-3.43849	-4.07771	1.1859	0.0592224	0.088455	A_51_P487818		Fabp1
293	16372	76566	-3.43482	-0.74623	0.217255	0.596159	0.088455	A_52_P5891		Fam101b
294	16993	83397	-3.43297	-1.20955	0.352333	0.432404	0.088455	A_51_P342567		Akap12
295	10609	434179	-3.43192	-0.819288	0.238726	0.566722	0.088455	A_52_P340133		Gm5595
297	3132	14527	-3.42789	-1.48266	0.432528	0.357829	0.088455	A_51_P211403		Gcgr
298	4918	192950	-3.42656	-1.05894	0.30904	0.479983	0.088455	A_52_P406181		Nacad
299	17138	93960	-3.42275	-1.3714	0.400673	0.386515	0.088455	A_52_P493925		Nkd1
300	2929	140792	-3.42082	-0.98783	0.28877	0.504236	0.088455	A_52_P527625		Colec12
301	5710	210297	-3.41986	-0.959237	0.28049	0.514329	0.088455	A_52_P616659		Lrch2
302	10121	330222	-3.41976	-0.80974	0.236783	0.570485	0.088455	A_51_P145360		Sdk1
303	4486	18442	-3.41824	-0.928935	0.271758	0.525246	0.088455	A_51_P287635		P2ry2
304	10036	328443	-3.41351	-1.64612	0.482235	0.319499	0.088455	A_52_P883300		E130202H07Rik
305	17035	83814	-3.41199	-0.956013	0.280193	0.51548	0.088455	A_51_P305936		Nedd4l
306	14903	71586	-3.40964	-0.624026	0.183018	0.648858	0.088455	A_52_P121468		Ifih1
307	16597	77579	-3.40944	-0.688567	0.201959	0.62047	0.088455	A_52_P631139		Myh10
308	1096	103889	-3.40916	-0.728438	0.213671	0.603557	0.088455	A_52_P15300		Hoxb2
3	817	100048506	-10.2255	-3.64927	0.356881	0.0797001	0
32	827	100048556	-6.15314	-2.02706	0.329435	0.245354	0
35	14829	71305	-5.99809	-1.37377	0.229035	0.38588	0
36	12049	632433	-5.9844	-1.22057	0.203958	0.429114	0
45	384	100044697	-5.6573	-1.70154	0.300769	0.307457	0
48	14613	70455	-5.59092	-0.959558	0.171628	0.514214	0
49	281	100044005	-5.5776	-1.1016	0.197504	0.465999	0
54	12051	632638	-5.42442	-0.990967	0.182686	0.503141	0
104	473	100045556	-4.48779	-1.29882	0.289412	0.406459	0
113	607	100046796	-4.39107	-0.846045	0.192674	0.556308	0
118	532	100046051	-4.36717	-0.973785	0.222979	0.509168	0
123	11990	627995	-4.30645	-0.905867	0.210351	0.533712	0
129	330	100044280	-4.27337	-0.711958	0.166604	0.610491	0
131	790	100048304	-4.26446	-1.08755	0.255027	0.470559	0
149	299	100044160	-4.14537	-1.39146	0.335667	0.381178	0
179	10111	330126	-3.92957	-2.76025	0.702432	0.147598	0
184	15411	72904	-3.91329	-0.772209	0.19733	0.58552	0
212	15416	72932	-3.74637	-1.85905	0.496226	0.275658	0
244	798	100048346	-3.58284	-1.387	0.387122	0.38236	0.088455
273	655	100047167	-3.4922	-0.874916	0.250534	0.545286	0.088455
296	327	100044273	-3.42999	-1.03463	0.301642	0.488141	0.088455

## Sheet: Two-calss SAM WT vs Nrf2-Keap1-
35A vs. 35D up	Row	Gene ID	Gene Name	Score(d)	Numerator(r)	Denominator(s+s0)	Fold Change	q-value(%)	Column A	MTW Status
1	2856	13982	2855	5.9304	1.35516	0.228511	2.55826	0	Esr1	Updated
2	16512	77037	16511	4.6766	2.1749	0.46506	4.51554	0	Mrap	Updated
3	8308	243197	8307	4.52383	0.722441	0.159697	1.64997	0	Mfsd7	Updated
4	9034	26874	9033	4.29152	1.1536	0.268809	2.22468	0	Abcd2	Updated
7	9232	27047	9231	3.73481	1.0193	0.272919	2.02694	10.962	Omd	Updated
8	16988	83379	16987	3.66281	0.870371	0.237624	1.82813	11.34	Klb	Updated
9	14374	69707	14373	3.57808	1.21343	0.339128	2.31888	11.34	Iqcg	Updated
10	1099	103968	1098	3.53651	2.6597	0.752068	6.31902	11.34	Plin	Updated
11	9049	268857	9048	3.51545	0.583629	0.166018	1.49861	11.34	Nlrc3	Updated
12	10365	381914	10364	3.48302	1.40828	0.404328	2.65421	11.34	B230311B06Rik	Updated
13	2281	12500	2280	3.42007	0.679036	0.198544	1.60107	11.34	Cd3d	Updated
14	1780	11537	1779	3.41849	2.57078	0.752023	5.94131	11.34	Cfd	Updated
15	9484	30051	9483	3.40322	0.809545	0.237876	1.75266	11.34	Spdef	Updated
16	8166	24082	8165	3.36487	0.95426	0.283595	1.93759	11.34	Gtlf3a	Updated
17	2050	12010	2049	3.32428	0.453583	0.136446	1.36944	11.34	B2m	Updated
18	1148	104681	1147	3.32362	0.545865	0.164238	1.4599	11.34	Slc16a6	Updated
19	1501	109222	1500	3.31919	0.798402	0.240541	1.73917	11.34	Rarres1	Updated
5	685	100047450	684	4.05496	0.935648	0.230741	1.91275	10.962		Non-updated
6	14546	70284	14545	3.79733	1.04532	0.275278	2.06382	10.962		Non-updated
35A vs. 35D down	Row	Gene ID	Gene Name	Score(d)	Numerator(r)	Denominator(s+s0)	Fold Change	q-value(%)
1	7297	230098	7296	-4.67002	-0.793424	0.169897	0.576973	5.8725	E130306D19Rik	Updated
2	4331	18024	4330	-4.5525	-1.6353	0.359209	0.321904	5.8725	Nfe2l2	Updated
3	16602	77592	16601	-4.22088	-0.732404	0.173519	0.6019	5.8725	4931406H21Rik	Updated
4	4126	17294	4125	-4.19212	-1.54986	0.369707	0.341543	5.8725	Mest	Updated
5	5908	213742	5907	-4.0958	-2.90339	0.70887	0.133657	5.8725	Xist	Updated
6	11531	56710	11530	-4.0598	-1.03747	0.255548	0.48718	5.8725	Dbc1	Updated
7	6630	22270	6629	-3.92651	-1.28925	0.328345	0.409164	5.8725	Upk3a	Updated
8	3781	16667	3780	-3.88677	-0.541881	0.139417	0.686875	5.8725	Krt17	Updated
9	15030	71884	15029	-3.84534	-0.827323	0.215149	0.563574	5.8725	Chit1	Updated
10	4898	19273	4897	-3.82127	-0.923894	0.241777	0.527085	5.8725	Ptpru	Updated

## Sheet: GSA WT vs Keap1- Canonical path
Current settings
Input parameters
Gene set (gmt) file										E:\manuscripts\Paper 2(resistance)\GSA\GSEA database\c2.cp.v3.0.symbols.gmt
Data type?										Two class unpaired
Arrays centered?										FALSE
False discovery rate (in each tail)										0.5
Test statistic										standard
Are data are log scale?										TRUE
Number of permutations										1000
Input percentile for exchangeability factor s0										Automatic choice
Number of neighbors for KNN										10
Minimum gene set size										15
Maximum gene set size										500
Seed for Random number generator										1234567
Computed values
Exchangibility factor s0										0.100592
s0 percentile										24.9945
List of Significant Gene sets for FDR = 0.5
Positive gene sets(49)
	Gene_set	Gene_set_name	Score	p-value	FDR		Complete name
	1	KEGG_GLYCOLYSIS_GLUC	0.6595	0	0		KEGG_GLYCOLYSIS_GLUCONEOGENESIS
	6	KEGG_GALACTOSE_METAB	0.3627	0	0		KEGG_GALACTOSE_METABOLISM
	8	KEGG_FATTY_ACID_META	0.5751	0	0		KEGG_FATTY_ACID_METABOLISM
	29	KEGG_GLUTATHIONE_MET	1.5324	0	0		KEGG_GLUTATHIONE_METABOLISM
	30	KEGG_STARCH_AND_SUCR	0.6652	0	0		KEGG_STARCH_AND_SUCROSE_METABOLISM
	42	KEGG_GLYCEROPHOSPHOL	0.2885	0	0		KEGG_GLYCEROPHOSPHOLIPID_METABOLISM
	43	KEGG_ETHER_LIPID_MET	0.7041	0	0		KEGG_ETHER_LIPID_METABOLISM
	44	KEGG_ARACHIDONIC_ACI	0.4967	0	0		KEGG_ARACHIDONIC_ACID_METABOLISM
	45	KEGG_LINOLEIC_ACID_M	0.8998	0	0		KEGG_LINOLEIC_ACID_METABOLISM
	52	KEGG_GLYOXYLATE_AND_	0.6167	0	0		KEGG_GLYOXYLATE_AND_DICARBOXYLATE_METABOLISM
	61	KEGG_PORPHYRIN_AND_C	0.4934	0	0		KEGG_PORPHYRIN_AND_CHLOROPHYLL_METABOLISM
	67	KEGG_METABOLISM_OF_X	1.9557	0	0		KEGG_METABOLISM_OF_XENOBIOTICS_BY_CYTOCHROME_P450
	68	KEGG_DRUG_METABOLISM	1.6873	0	0		KEGG_DRUG_METABOLISM_CYTOCHROME_P450
	71	KEGG_ABC_TRANSPORTER	0.9927	0	0		KEGG_ABC_TRANSPORTERS
	80	KEGG_PPAR_SIGNALING_	0.4588	0	0		KEGG_PPAR_SIGNALING_PATHWAY
	101	KEGG_PEROXISOME	0.3586	0	0		KEGG_PEROXISOME
	131	KEGG_FC_EPSILON_RI_S	0.2713	0	0		KEGG_FC_EPSILON_RI_SIGNALING_PATHWAY
	146	KEGG_ADIPOCYTOKINE_S	0.2374	0	0		KEGG_ADIPOCYTOKINE_SIGNALING_PATHWAY
	147	KEGG_TYPE_II_DIABETE	0.3243	0	0		KEGG_TYPE_II_DIABETES_MELLITUS
	172	KEGG_BLADDER_CANCER	0.1558	0	0		KEGG_BLADDER_CANCER
	210	BIOCARTA_BIOPEPTIDES	0.1263	0	0		BIOCARTA_BIOPEPTIDES_PATHWAY
	255	BIOCARTA_EIF_PATHWAY	0.506	0	0		BIOCARTA_EIF_PATHWAY
	279	BIOCARTA_IL3_PATHWAY	0.3117	0	0		BIOCARTA_IL3_PATHWAY
	282	BIOCARTA_IL6_PATHWAY	0.422	0	0		BIOCARTA_IL6_PATHWAY
	316	BIOCARTA_NUCLEARRS_P	2.0821	0	0		BIOCARTA_NUCLEARRS_PATHWAY
	407	REACTOME_ACTIVATED_A	0.6379	0	0		REACTOME_ACTIVATED_AMPK_STIMULATES_FATTY_ACID_OXIDATION_IN_MUSCLE
	418	REACTOME_AMINO_ACID_	0.546	0	0		REACTOME_AMINO_ACID_AND_OLIGOPEPTIDE_SLC_TRANSPORTERS
	419	REACTOME_AMINO_ACID_	0.8476	0	0		REACTOME_AMINO_ACID_TRANSPORT_ACROSS_THE_PLASMA_MEMBRANE
	429	REACTOME_BIOLOGICAL_	0.9897	0	0		REACTOME_BIOLOGICAL_OXIDATIONS
	434	REACTOME_CD28_CO_STI	0.3809	0	0		REACTOME_CD28_CO_STIMULATION
	435	REACTOME_CD28_DEPEND	0.5835	0	0		REACTOME_CD28_DEPENDENT_PI3K_AKT_SIGNALING
	530	REACTOME_GLUTATHIONE	3.7682	0	0		REACTOME_GLUTATHIONE_CONJUGATION
	562	REACTOME_IRS_RELATED	0.345	0	0		REACTOME_IRS_RELATED_EVENTS
	572	REACTOME_METABOLISM_	0.8401	0	0		REACTOME_METABOLISM_OF_BILE_ACIDS_AND_BILE_SALTS
	578	REACTOME_MICRORNA_BI	0.2483	0	0		REACTOME_MICRORNA_BIOGENESIS
	625	REACTOME_PHASE_1_FUN	0.5021	0	0		REACTOME_PHASE_1_FUNCTIONALIZATION_OF_COMPOUNDS
	626	REACTOME_PHASE_II_CO	1.4773	0	0		REACTOME_PHASE_II_CONJUGATION
	629	REACTOME_PI3K_AKT_SI	0.6705	0	0		REACTOME_PI3K_AKT_SIGNALLING
	644	REACTOME_PURINE_META	0.5386	0	0		REACTOME_PURINE_METABOLISM
	659	REACTOME_REGULATION_	0.2268	0	0		REACTOME_REGULATION_OF_LIPID_METABOLISM_BY_PEROXISOME_PROLIFERATOR_ACTIVATED_RECEPTOR_ALPHA
	733	REACTOME_TRAFFICKING	0.4258	0	0		REACTOME_TRAFFICKING_OF_GLUR2_CONTAINING_AMPA_RECEPTORS
	774	REACTOME_AMINE_COMPO	0.4815	0	0		REACTOME_AMINE_COMPOUND_SLC_TRANSPORTERS
	803	REACTOME_GAP_JUNCTIO	0.7858	0	0		REACTOME_GAP_JUNCTION_ASSEMBLY
	811	REACTOME_NA_CL_DEPEN	0.7373	0	0		REACTOME_NA_CL_DEPENDENT_NEUROTRANSMITTER_TRANSPORTERS
	872	SA_MMP_CYTOKINE_CONN	0.7781	0	0		SA_MMP_CYTOKINE_CONNECTION
	875	ST_FAS_SIGNALING_PAT	0.1485	0	0		ST_FAS_SIGNALING_PATHWAY
	428	REACTOME_BASIGIN_INT	0.8636	0.009	0.1314		REACTOME_BASIGIN_INTERACTIONS
	571	REACTOME_METABOLISM_	0.1856	0.009	0.1314		REACTOME_METABOLISM_OF_AMINO_ACIDS
	334	BIOCARTA_RAS_PATHWAY	0.2955	0.034	0.4864		BIOCARTA_RAS_PATHWAY
Negative gene sets(28)
	Gene_set	Gene_set_name	Score	p-value	FDR	Complete name
	33	KEGG_O_GLYCAN_BIOSYN	-0.3502	0	0	KEGG_O_GLYCAN_BIOSYNTHESIS
	34	KEGG_AMINO_SUGAR_AND	-0.3071	0	0	KEGG_AMINO_SUGAR_AND_NUCLEOTIDE_SUGAR_METABOLISM
	73	KEGG_RNA_DEGRADATION	-0.1764	0	0	KEGG_RNA_DEGRADATION
	119	KEGG_COMPLEMENT_AND_	-1.0304	0	0	KEGG_COMPLEMENT_AND_COAGULATION_CASCADES
	139	KEGG_OLFACTORY_TRANS	-0.4984	0	0	KEGG_OLFACTORY_TRANSDUCTION
	160	KEGG_PATHOGENIC_ESCH	-0.4089	0	0	KEGG_PATHOGENIC_ESCHERICHIA_COLI_INFECTION
	191	BIOCARTA_AMI_PATHWAY	-1.9852	0	0	BIOCARTA_AMI_PATHWAY
	199	BIOCARTA_AT1R_PATHWA	-0.1339	0	0	BIOCARTA_AT1R_PATHWAY
	231	BIOCARTA_GCR_PATHWAY	-0.6065	0	0	BIOCARTA_GCR_PATHWAY
	245	BIOCARTA_CALCINEURIN	-0.368	0	0	BIOCARTA_CALCINEURIN_PATHWAY
	289	BIOCARTA_DEATH_PATHW	-0.2265	0	0	BIOCARTA_DEATH_PATHWAY
	294	BIOCARTA_INTRINSIC_P	-1.4997	0	0	BIOCARTA_INTRINSIC_PATHWAY
	302	BIOCARTA_PPARA_PATHW	-0.3075	0	0	BIOCARTA_PPARA_PATHWAY
	354	BIOCARTA_MAL_PATHWAY	-0.6315	0	0	BIOCARTA_MAL_PATHWAY
	356	BIOCARTA_MITOCHONDRI	-0.4755	0	0	BIOCARTA_MITOCHONDRIA_PATHWAY
	390	BIOCARTA_TNFR1_PATHW	-0.1698	0	0	BIOCARTA_TNFR1_PATHWAY
	408	REACTOME_ACTIVATED_T	-0.5529	0	0	REACTOME_ACTIVATED_TLR4_SIGNALLING
	448	REACTOME_CHYLOMICRON	-0.7979	0	0	REACTOME_CHYLOMICRON_MEDIATED_LIPID_TRANSPORT
	521	REACTOME_GENES_INVOL	-0.5514	0	0	REACTOME_GENES_INVOLVED_IN_APOPTOTIC_CLEAVAGE_OF_CELLULAR_PROTEINS
	542	REACTOME_HIV1_TRANSC	-0.095	0	0	REACTOME_HIV1_TRANSCRIPTION_ELONGATION
	559	REACTOME_INTEGRIN_CE	-0.4358	0	0	REACTOME_INTEGRIN_CELL_SURFACE_INTERACTIONS
	589	REACTOME_MYD88_CASCA	-0.8421	0	0	REACTOME_MYD88_CASCADE
	605	REACTOME_NUCLEOTIDE_	-0.7847	0	0	REACTOME_NUCLEOTIDE_LIKE_PURINERGIC_RECEPTORS
	655	REACTOME_REGULATION_	-0.8288	0	0	REACTOME_REGULATION_OF_INSULIN_LIKE_GROWTH_FACTOR_ACTIVITY_BY_INSULIN_LIKE_GROWTH_FACTOR_BINDING_PROTEINS
	728	REACTOME_TOLL_LIKE_R	-0.556	0	0	REACTOME_TOLL_LIKE_RECEPTOR_4_CASCADE
	729	REACTOME_TOLL_LIKE_R	-0.5874	0	0	REACTOME_TOLL_LIKE_RECEPTOR_9_CASCADE
	826	REACTOME_METABOLISM_	-0.1485	0	0	REACTOME_METABOLISM_OF_RNA
	843	SA_CASPASE_CASCADE	-0.5281	0	0	SA_CASPASE_CASCADE
Current settings
Input parameters
Gene set (gmt) file										E:\manuscripts\Paper 2(resistance)\GSA\GSEA database\c2.cp.v3.0.symbols.gmt
Data type?										Two class unpaired
Arrays centered?										FALSE
False discovery rate (in each tail)										0.596
Test statistic										standard
Are data are log scale?										TRUE
Number of permutations										1000
Input percentile for exchangeability factor s0										Automatic choice
Number of neighbors for KNN										10
Minimum gene set size										15
Maximum gene set size										500
Seed for Random number generator										1234567
Computed values
Exchangibility factor s0										0.100592
s0 percentile										24.9945
List of Significant Gene sets for FDR = 0.596
Positive gene sets(69)
	Gene_set	Gene_set_name	Score	p-value	FDR
	1	KEGG_GLYCOLYSIS_GLUC	0.6595	0	0
	6	KEGG_GALACTOSE_METAB	0.3627	0	0
	8	KEGG_FATTY_ACID_META	0.5751	0	0
	29	KEGG_GLUTATHIONE_MET	1.5324	0	0
	30	KEGG_STARCH_AND_SUCR	0.6652	0	0
	42	KEGG_GLYCEROPHOSPHOL	0.2885	0	0
	43	KEGG_ETHER_LIPID_MET	0.7041	0	0
	44	KEGG_ARACHIDONIC_ACI	0.4967	0	0
	45	KEGG_LINOLEIC_ACID_M	0.8998	0	0
	52	KEGG_GLYOXYLATE_AND_	0.6167	0	0
	61	KEGG_PORPHYRIN_AND_C	0.4934	0	0
	67	KEGG_METABOLISM_OF_X	1.9557	0	0
	68	KEGG_DRUG_METABOLISM	1.6873	0	0
	71	KEGG_ABC_TRANSPORTER	0.9927	0	0
	80	KEGG_PPAR_SIGNALING_	0.4588	0	0
	101	KEGG_PEROXISOME	0.3586	0	0
	131	KEGG_FC_EPSILON_RI_S	0.2713	0	0
	146	KEGG_ADIPOCYTOKINE_S	0.2374	0	0
	147	KEGG_TYPE_II_DIABETE	0.3243	0	0
	172	KEGG_BLADDER_CANCER	0.1558	0	0
	210	BIOCARTA_BIOPEPTIDES	0.1263	0	0
	255	BIOCARTA_EIF_PATHWAY	0.506	0	0
	279	BIOCARTA_IL3_PATHWAY	0.3117	0	0
	282	BIOCARTA_IL6_PATHWAY	0.422	0	0
	316	BIOCARTA_NUCLEARRS_P	2.0821	0	0
	407	REACTOME_ACTIVATED_A	0.6379	0	0
	418	REACTOME_AMINO_ACID_	0.546	0	0
	419	REACTOME_AMINO_ACID_	0.8476	0	0
	429	REACTOME_BIOLOGICAL_	0.9897	0	0
	434	REACTOME_CD28_CO_STI	0.3809	0	0
	435	REACTOME_CD28_DEPEND	0.5835	0	0
	530	REACTOME_GLUTATHIONE	3.7682	0	0
	562	REACTOME_IRS_RELATED	0.345	0	0
	572	REACTOME_METABOLISM_	0.8401	0	0
	578	REACTOME_MICRORNA_BI	0.2483	0	0
	625	REACTOME_PHASE_1_FUN	0.5021	0	0
	626	REACTOME_PHASE_II_CO	1.4773	0	0
	629	REACTOME_PI3K_AKT_SI	0.6705	0	0
	644	REACTOME_PURINE_META	0.5386	0	0
	659	REACTOME_REGULATION_	0.2268	0	0
	733	REACTOME_TRAFFICKING	0.4258	0	0
	774	REACTOME_AMINE_COMPO	0.4815	0	0
	803	REACTOME_GAP_JUNCTIO	0.7858	0	0
	811	REACTOME_NA_CL_DEPEN	0.7373	0	0
	872	SA_MMP_CYTOKINE_CONN	0.7781	0	0
	875	ST_FAS_SIGNALING_PAT	0.1485	0	0
	428	REACTOME_BASIGIN_INT	0.8636	0.009	0.1314
	571	REACTOME_METABOLISM_	0.1856	0.009	0.1314
	334	BIOCARTA_RAS_PATHWAY	0.2955	0.034	0.4864
	25	KEGG_TRYPTOPHAN_META	0.2523	0.043	0.5257
	467	REACTOME_CYTOSOLIC_T	0.58	0.043	0.5257
	5	KEGG_FRUCTOSE_AND_MA	0.2547	0.044	0.5257
	182	KEGG_PRIMARY_IMMUNOD	0.616	0.044	0.5257
	194	BIOCARTA_ARAP_PATHWA	0.6339	0.044	0.5257
	158	KEGG_VIBRIO_CHOLERAE	0.5583	0.045	0.5257
	290	BIOCARTA_RACCYCD_PAT	0.2173	0.045	0.5257
	386	BIOCARTA_LONGEVITY_P	0.4424	0.045	0.5257
	400	BIOCARTA_VEGF_PATHWA	0.2833	0.045	0.5257
	527	REACTOME_GLUCOSE_MET	0.2244	0.045	0.5257
	586	REACTOME_MTOR_SIGNAL	0.3887	0.045	0.5257
	66	KEGG_AMINOACYL_TRNA_	0.387	0.05	0.5608
	60	KEGG_RETINOL_METABOL	0.6039	0.052	0.5608
	300	BIOCARTA_MAPK_PATHWA	0.1632	0.052	0.5608
	713	REACTOME_STEROID_MET	0.5974	0.052	0.5608
	840	ST_ERK1_ERK2_MAPK_PA	0.1601	0.052	0.5608
	23	KEGG_TYROSINE_METABO	0.489	0.058	0.5892
	283	BIOCARTA_IL10_PATHWA	0.5086	0.058	0.5892
	570	REACTOME_METABLISM_O	0.2607	0.058	0.5892
	717	REACTOME_SYNTHESIS_O	0.6263	0.058	0.5892
Negative gene sets(28)
	Gene_set	Gene_set_name	Score	p-value	FDR
	33	KEGG_O_GLYCAN_BIOSYN	-0.3502	0	0
	34	KEGG_AMINO_SUGAR_AND	-0.3071	0	0
	73	KEGG_RNA_DEGRADATION	-0.1764	0	0
	119	KEGG_COMPLEMENT_AND_	-1.0304	0	0
	139	KEGG_OLFACTORY_TRANS	-0.4984	0	0
	160	KEGG_PATHOGENIC_ESCH	-0.4089	0	0
	191	BIOCARTA_AMI_PATHWAY	-1.9852	0	0
	199	BIOCARTA_AT1R_PATHWA	-0.1339	0	0
	231	BIOCARTA_GCR_PATHWAY	-0.6065	0	0
	245	BIOCARTA_CALCINEURIN	-0.368	0	0
	289	BIOCARTA_DEATH_PATHW	-0.2265	0	0
	294	BIOCARTA_INTRINSIC_P	-1.4997	0	0
	302	BIOCARTA_PPARA_PATHW	-0.3075	0	0
	354	BIOCARTA_MAL_PATHWAY	-0.6315	0	0
	356	BIOCARTA_MITOCHONDRI	-0.4755	0	0
	390	BIOCARTA_TNFR1_PATHW	-0.1698	0	0
	408	REACTOME_ACTIVATED_T	-0.5529	0	0
	448	REACTOME_CHYLOMICRON	-0.7979	0	0
	521	REACTOME_GENES_INVOL	-0.5514	0	0
	542	REACTOME_HIV1_TRANSC	-0.095	0	0
	559	REACTOME_INTEGRIN_CE	-0.4358	0	0
	589	REACTOME_MYD88_CASCA	-0.8421	0	0
	605	REACTOME_NUCLEOTIDE_	-0.7847	0	0
	655	REACTOME_REGULATION_	-0.8288	0	0
	728	REACTOME_TOLL_LIKE_R	-0.556	0	0
	729	REACTOME_TOLL_LIKE_R	-0.5874	0	0
	826	REACTOME_METABOLISM_	-0.1485	0	0
	843	SA_CASPASE_CASCADE	-0.5281	0	0

## Sheet: GSA WT vs Keap1- Gene ontology
Current settings
Input parameters
Gene set (gmt) file										E:\manuscripts\Paper 2(resistance)\GSA\GSEA database\c5.all.v3.0.symbols.gmt
Data type?										Two class unpaired
Arrays centered?										FALSE
False discovery rate (in each tail)										0.5
Test statistic										standard
Are data are log scale?										TRUE
Number of permutations										1000
Input percentile for exchangeability factor s0										Automatic choice
Number of neighbors for KNN										10
Minimum gene set size										15
Maximum gene set size										500
Seed for Random number generator										1234567
Computed values
Exchangibility factor s0										0.130006
s0 percentile										39.993
List of Significant Gene sets for FDR = 0.5
Positive gene sets(53)
	Gene_set	Gene_set_name	Score	p-value	FDR	Column B
	5	CYTOPLASMIC_VESICLE_	0.4293	0	0	CYTOPLASMIC_VESICLE_MEMBRANE
	116	CYTOPLASMIC_VESICLE_	0.4293	0	0	CYTOPLASMIC_VESICLE_PART
	167	NUCLEOPLASM_PART	0.0957	0	0	NUCLEOPLASM_PART
	169	SECRETORY_GRANULE	0.3734	0	0	SECRETORY_GRANULE
	185	NUCLEOLAR_PART	0.5575	0	0	NUCLEOLAR_PART
	200	NUCLEAR_MEMBRANE_PAR	0.153	0	0	NUCLEAR_MEMBRANE_PART
	231	VESICLE_MEMBRANE	0.4462	0	0	VESICLE_MEMBRANE
	260	NUCLEOBASENUCLEOSIDE	0.2314	0	0	NUCLEOBASENUCLEOSIDE_AND_NUCLEOTIDE_METABOLIC_PROCESS
	310	FEMALE_PREGNANCY	0.3848	0	0	FEMALE_PREGNANCY
	319	TUBE_MORPHOGENESIS	1.3322	0	0	TUBE_MORPHOGENESIS
	321	MACROMOLECULAR_COMPL	0.1345	0	0	MACROMOLECULAR_COMPLEX_ASSEMBLY
	325	COFACTOR_METABOLIC_P	0.7618	0	0	COFACTOR_METABOLIC_PROCESS
	373	COENZYME_METABOLIC_P	1.095	0	0	COENZYME_METABOLIC_PROCESS
	389	SULFUR_COMPOUND_BIOS	0.9798	0	0	SULFUR_COMPOUND_BIOSYNTHETIC_PROCESS
	426	VIRAL_REPRODUCTIVE_P	0.2196	0	0	VIRAL_REPRODUCTIVE_PROCESS
	465	TUBE_DEVELOPMENT	1.0343	0	0	TUBE_DEVELOPMENT
	521	CELLULAR_BIOSYNTHETI	0.124	0	0	CELLULAR_BIOSYNTHETIC_PROCESS
	552	DETECTION_OF_CHEMICA	0.5246	0	0	DETECTION_OF_CHEMICAL_STIMULUS
	610	RESPONSE_TO_CHEMICAL	0.2256	0	0	RESPONSE_TO_CHEMICAL_STIMULUS
	634	CELLULAR_COMPONENT_A	0.1253	0	0	CELLULAR_COMPONENT_ASSEMBLY
	666	RESPONSE_TO_OXIDATIV	0.6543	0	0	RESPONSE_TO_OXIDATIVE_STRESS
	673	RESPONSE_TO_TEMPERAT	0.9523	0	0	RESPONSE_TO_TEMPERATURE_STIMULUS
	704	INTERACTION_WITH_HOS	0.6769	0	0	INTERACTION_WITH_HOST
	925	COFACTOR_BIOSYNTHETI	1.1824	0	0	COFACTOR_BIOSYNTHETIC_PROCESS
	949	NUCLEOTIDE_METABOLIC	0.4078	0	0	NUCLEOTIDE_METABOLIC_PROCESS
	950	CELLULAR_CARBOHYDRAT	0.6392	0	0	CELLULAR_CARBOHYDRATE_CATABOLIC_PROCESS
	968	CARBOHYDRATE_CATABOL	0.5701	0	0	CARBOHYDRATE_CATABOLIC_PROCESS
	995	STEROID_BIOSYNTHETIC	0.4262	0	0	STEROID_BIOSYNTHETIC_PROCESS
	1047	RESPONSE_TO_DRUG	1.406	0	0	RESPONSE_TO_DRUG
	1066	ACTIVE_TRANSMEMBRANE	0.4898	0	0	ACTIVE_TRANSMEMBRANE_TRANSPORTER_ACTIVITY
	1077	NUCLEOTIDE_BINDING	0.2975	0	0	NUCLEOTIDE_BINDING
	1113	SECONDARY_ACTIVE_TRA	0.7127	0	0	SECONDARY_ACTIVE_TRANSMEMBRANE_TRANSPORTER_ACTIVITY
	1122	LIGASE_ACTIVITY	0.1769	0	0	LIGASE_ACTIVITY
	1138	PURINE_NUCLEOTIDE_BI	0.3007	0	0	PURINE_NUCLEOTIDE_BINDING
	1172	AMINO_ACID_TRANSMEMB	0.7949	0	0	AMINO_ACID_TRANSMEMBRANE_TRANSPORTER_ACTIVITY
	1201	ADENYL_RIBONUCLEOTID	0.3048	0	0	ADENYL_RIBONUCLEOTIDE_BINDING
	1205	ADENYL_NUCLEOTIDE_BI	0.2862	0	0	ADENYL_NUCLEOTIDE_BINDING
	1214	AMINE_TRANSMEMBRANE_	0.6877	0	0	AMINE_TRANSMEMBRANE_TRANSPORTER_ACTIVITY
	1221	OXIDOREDUCTASE_ACTIV	0.2182	0	0	OXIDOREDUCTASE_ACTIVITY
	1257	PROTEIN_TYROSINE_KIN	0.161	0	0	PROTEIN_TYROSINE_KINASE_ACTIVITY
	1276	HYDROLASE_ACTIVITY_A	1.2809	0	0	HYDROLASE_ACTIVITY_ACTING_ON_CARBON_NITROGEN_NOT_PEPTIDEBONDSIN_CYCLIC_AMIDINES
	1290	TRANSFERASE_ACTIVITY	1.036	0	0	TRANSFERASE_ACTIVITY_TRANSFERRING_ALKYL_OR_ARYLOTHER_THAN_METHYLGROUPS
	1333	OXIDOREDUCTASE_ACTIV	0.8359	0	0	OXIDOREDUCTASE_ACTIVITY_ACTING_ON_THE_CH_CH_GROUP_OF_DONORS
	1371	TRANSMEMBRANE_RECEPT	0.2135	0	0	TRANSMEMBRANE_RECEPTOR_PROTEIN_TYROSINE_KINASE_ACTIVITY
	1374	OXIDOREDUCTASE_ACTIV	0.6717	0	0	OXIDOREDUCTASE_ACTIVITY_ACTING_ON_THE_ALDEHYDE_OR_OXO_GROUP_OF_DONORS
	1391	SIGNAL_SEQUENCE_BIND	0.556	0	0	SIGNAL_SEQUENCE_BINDING
	1394	L_AMINO_ACID_TRANSME	1.0104	0	0	L_AMINO_ACID_TRANSMEMBRANE_TRANSPORTER_ACTIVITY
	1403	PURINE_RIBONUCLEOTID	0.3158	0	0	PURINE_RIBONUCLEOTIDE_BINDING
	1405	ORGANIC_ACID_TRANSME	0.7807	0	0	ORGANIC_ACID_TRANSMEMBRANE_TRANSPORTER_ACTIVITY
	1408	OXIDOREDUCTASE_ACTIV	0.4872	0	0	OXIDOREDUCTASE_ACTIVITY_ACTING_ON_THE_ALDEHYDE_OR_OXO_GROUP_OF_DONORSNAD_OR_NADP_AS_ACCEPTOR
	1414	CARBOXYLIC_ACID_TRAN	0.8214	0	0	CARBOXYLIC_ACID_TRANSMEMBRANE_TRANSPORTER_ACTIVITY
	1418	GLUTATHIONE_TRANSFER	1.9665	0	0	GLUTATHIONE_TRANSFERASE_ACTIVITY
	1444	ATP_BINDING	0.2585	0	0	ATP_BINDING
Negative gene sets(49)
	Gene_set	Gene_set_name	Score	p-value	FDR	Column B
	1	NUCLEOPLASM	-0.0992	0	0	NUCLEOPLASM
	38	EXTRACELLULAR_REGION	-0.261	0	0	EXTRACELLULAR_REGION
	108	EXTRACELLULAR_REGION	-0.3576	0	0	EXTRACELLULAR_REGION_PART
	135	LIPID_RAFT	-0.8914	0	0	LIPID_RAFT
	149	APICAL_PART_OF_CELL	-0.9786	0	0	APICAL_PART_OF_CELL
	202	TRANSCRIPTION_FACTOR	-0.1284	0	0	TRANSCRIPTION_FACTOR_COMPLEX
	217	COLLAGEN	-1.1257	0	0	COLLAGEN
	255	PHOSPHOLIPID_BIOSYNT	-0.4718	0	0	PHOSPHOLIPID_BIOSYNTHETIC_PROCESS
	259	GLYCEROPHOSPHOLIPID_	-0.3571	0	0	GLYCEROPHOSPHOLIPID_BIOSYNTHETIC_PROCESS
	308	PROTEIN_AMINO_ACID_N	-0.3673	0	0	PROTEIN_AMINO_ACID_N_LINKED_GLYCOSYLATION
	320	REGULATION_OF_CYTOKI	-0.503	0	0	REGULATION_OF_CYTOKINE_SECRETION
	406	SKELETAL_DEVELOPMENT	-0.408	0	0	SKELETAL_DEVELOPMENT
	448	CARBOHYDRATE_TRANSPO	-0.6609	0	0	CARBOHYDRATE_TRANSPORT
	497	MEMBRANE_LIPID_BIOSY	-0.3713	0	0	MEMBRANE_LIPID_BIOSYNTHETIC_PROCESS
	518	LIPOPROTEIN_METABOLI	-0.5307	0	0	LIPOPROTEIN_METABOLIC_PROCESS
	550	LIPID_BIOSYNTHETIC_P	-0.1541	0	0	LIPID_BIOSYNTHETIC_PROCESS
	553	POSITIVE_REGULATION_	-0.3366	0	0	POSITIVE_REGULATION_OF_HYDROLASE_ACTIVITY
	629	MORPHOGENESIS_OF_AN_	-1.1714	0	0	MORPHOGENESIS_OF_AN_EPITHELIUM
	678	REGULATION_OF_ACTION	-0.8571	0	0	REGULATION_OF_ACTION_POTENTIAL
	680	LIPID_HOMEOSTASIS	-1.3474	0	0	LIPID_HOMEOSTASIS
	693	PROTEIN_SECRETION	-0.1804	0	0	PROTEIN_SECRETION
	737	GLYCOPROTEIN_BIOSYNT	-0.2686	0	0	GLYCOPROTEIN_BIOSYNTHETIC_PROCESS
	758	LIPOPROTEIN_BIOSYNTH	-0.5615	0	0	LIPOPROTEIN_BIOSYNTHETIC_PROCESS
	781	GLYCEROPHOSPHOLIPID_	-0.2958	0	0	GLYCEROPHOSPHOLIPID_METABOLIC_PROCESS
	795	PEPTIDYL_AMINO_ACID_	-0.2615	0	0	PEPTIDYL_AMINO_ACID_MODIFICATION
	906	POSITIVE_REGULATION_	-0.1977	0	0	POSITIVE_REGULATION_OF_PROTEIN_METABOLIC_PROCESS
	917	APOPTOTIC_PROGRAM	-0.4025	0	0	APOPTOTIC_PROGRAM
	936	TISSUE_REMODELING	-0.7094	0	0	TISSUE_REMODELING
	975	CYTOKINE_SECRETION	-0.4782	0	0	CYTOKINE_SECRETION
	982	REGULATION_OF_PROTEI	-0.6104	0	0	REGULATION_OF_PROTEIN_STABILITY
	1078	COPPER_ION_BINDING	-0.376	0	0	COPPER_ION_BINDING
	1089	PROTEIN_TYROSINE_PHO	-0.196	0	0	PROTEIN_TYROSINE_PHOSPHATASE_ACTIVITY
	1095	LIPID_BINDING	-0.5629	0	0	LIPID_BINDING
	1152	TRANSFERASE_ACTIVITY	-0.5101	0	0	TRANSFERASE_ACTIVITY_TRANSFERRING_HEXOSYL_GROUPS
	1160	LIPOPROTEIN_BINDING	-0.6382	0	0	LIPOPROTEIN_BINDING
	1168	UDP_GLYCOSYLTRANSFER	-0.632	0	0	UDP_GLYCOSYLTRANSFERASE_ACTIVITY
	1169	PHOSPHOLIPID_BINDING	-0.5004	0	0	PHOSPHOLIPID_BINDING
	1193	TRANSFERASE_ACTIVITY	-0.4036	0	0	TRANSFERASE_ACTIVITY_TRANSFERRING_GLYCOSYL_GROUPS
	1202	EXOPEPTIDASE_ACTIVIT	-0.4207	0	0	EXOPEPTIDASE_ACTIVITY
	1250	ANION_CHANNEL_ACTIVI	-0.6443	0	0	ANION_CHANNEL_ACTIVITY
	1261	SULFURIC_ESTER_HYDRO	-0.95	0	0	SULFURIC_ESTER_HYDROLASE_ACTIVITY
	1266	CARBOHYDRATE_TRANSME	-0.7346	0	0	CARBOHYDRATE_TRANSMEMBRANE_TRANSPORTER_ACTIVITY
	1314	ACETYLGLUCOSAMINYLTR	-1.1529	0	0	ACETYLGLUCOSAMINYLTRANSFERASE_ACTIVITY
	1352	STEROID_BINDING	-0.6262	0	0	STEROID_BINDING
	1362	CHLORIDE_CHANNEL_ACT	-0.6443	0	0	CHLORIDE_CHANNEL_ACTIVITY
	1399	GROWTH_FACTOR_BINDIN	-0.3284	0	0	GROWTH_FACTOR_BINDING
	1443	CYTOKINE_ACTIVITY	-0.3806	0	0	CYTOKINE_ACTIVITY
	1129	METALLOPEPTIDASE_ACT	-0.3431	0.015	0.3238	METALLOPEPTIDASE_ACTIVITY
	419	POSITIVE_REGULATION_	-0.5087	0.019	0.4017	POSITIVE_REGULATION_OF_CYTOKINE_BIOSYNTHETIC_PROCESS

## Sheet: GSA WT vs Keap1- Transcrip fa
Current settings
Input parameters
Gene set (gmt) file								E:\manuscripts\Paper 2(resistance)\GSA\GSEA database\c3.tft.v3.0.symbols.gmt
Data type?								Two class unpaired
Arrays centered?								FALSE
False discovery rate (in each tail)								0.5
Test statistic								standard
Are data are log scale?								TRUE
Number of permutations								1000
Input percentile for exchangeability factor s0								Automatic choice
Number of neighbors for KNN								10
Minimum gene set size								15
Maximum gene set size								500
Seed for Random number generator								1234567
Computed values
Exchangibility factor s0								0.14086
s0 percentile								44.9945
List of Significant Gene sets for FDR = 0.5
Positive gene sets(62)
	Gene_set	Gene_set_name	Score	p-value	FDR
	20	V$NFE2_01	0.3412	0	0
	25	V$E4BP4_01	0.2092	0	0
	31	V$NMYC_01	0.1384	0	0
	34	V$HEN1_02	0.1757	0	0
	46	V$GATA1_01	0.1197	0	0
	67	V$CDP_02	0.3037	0	0
	74	V$CREB_02	0.103	0	0
	84	ACTAYRNNNCCCR_UNKNOW	0.2329	0	0
	95	ACTWSNACTNY_UNKNOWN	0.2747	0	0
	117	ARGGGTTAA_UNKNOWN	0.2078	0	0
	143	V$AP1_C	0.3118	0	0
	156	V$SREBP1_01	0.1876	0	0
	174	V$NGFIC_01	0.0828	0	0
	196	V$TCF11MAFG_01	0.4812	0	0
	198	V$NFY_01	0.218	0	0
	211	V$ZF5_B	0.2234	0	0
	215	V$GABP_B	0.1217	0	0
	233	V$HNF4_01_B	0.2177	0	0
	234	V$AREB6_01	0.1518	0	0
	262	V$ZIC1_01	0.1547	0	0
	264	V$ZIC3_01	0.0618	0	0
	291	V$ATF6_01	0.1801	0	0
	299	V$STAT1_02	0.1516	0	0
	316	V$AP1_01	0.3293	0	0
	327	V$CEBPDELTA_Q6	0.1256	0	0
	342	V$LFA1_Q6	0.2505	0	0
	358	V$ALPHACP1_01	0.1435	0	0
	398	V$SREBP1_Q6	0.2405	0	0
	405	V$HNF4_DR1_Q3	0.1702	0	0
	408	V$FXR_IR1_Q6	0.2006	0	0
	416	V$NFY_Q6_01	0.2573	0	0
	417	V$SREBP_Q3	0.2223	0	0
	443	V$NRF2_Q4	0.492	0	0
	459	V$AP1_Q4_01	0.2703	0	0
	484	V$PXR_Q2	0.2282	0	0
	503	RACTNNRTTTNC_UNKNOWN	0.3149	0	0
	527	TNCATNTCCYR_UNKNOWN	0.2987	0	0
	532	WCAANNNYCAG_UNKNOWN	0.1486	0	0
	553	YTCCCRNNAGGY_UNKNOWN	0.3073	0	0
	563	TTGCWCAAY_V$CEBPB_02	0.3527	0	0
	594	TGASTMAGC_V$NFE2_01	0.5491	0	0
	613	TGANNYRGCA_V$TCF11MA	0.2492	0	0
	303	V$STAT1_03	0.1492	0.043	0.4721
	343	V$LXR_Q3	0.2311	0.043	0.4721
	19	V$P300_01	0.1102	0.045	0.4721
	188	V$AML1_01	0.1436	0.045	0.4721
	276	V$HIF1_Q5	0.051	0.045	0.4721
	345	V$MAZ_Q6	0.095	0.045	0.4721
	400	V$AML1_Q6	0.1436	0.045	0.4721
	480	GGCNRNWCTTYS_UNKNOWN	0.1154	0.045	0.4721
	526	TMTCGCGANR_UNKNOWN	0.0637	0.045	0.4721
	568	GTGACGY_V$E4F1_Q6	0.0567	0.045	0.4721
	609	TCANNTGAY_V$SREBP1_0	0.0949	0.045	0.4721
	556	YYCATTCAWW_UNKNOWN	0.1492	0.047	0.4721
	130	V$NFY_Q6	0.0843	0.048	0.4721
	186	V$HLF_01	0.0981	0.048	0.4721
	47	V$GATA2_01	0.2083	0.05	0.4721
	79	V$MYCMAX_01	0.0677	0.05	0.4721
	119	V$AP1FJ_Q2	0.1702	0.05	0.4721
	155	V$USF_C	0.2597	0.05	0.4721
	375	V$CACBINDINGPROTEIN_	0.1317	0.05	0.4721
	413	V$MYB_Q3	0.1075	0.052	0.4831
Negative gene sets(31)
	Gene_set	Gene_set_name	Score	p-value	FDR
	2	AAAYRNCTG_UNKNOWN	-0.1415	0	0
	63	V$PBX1_01	-0.2429	0	0
	68	V$CDPCR1_01	-0.225	0	0
	75	V$TAXCREB_01	-0.1998	0	0
	77	V$CEBPA_01	-0.1902	0	0
	78	V$CEBPB_02	-0.1236	0	0
	115	V$SRY_02	-0.1303	0	0
	118	V$OCT1_06	-0.1052	0	0
	177	V$OCT1_07	-0.1819	0	0
	206	V$NFAT_Q6	-0.1748	0	0
	226	V$EN1_01	-0.2269	0	0
	237	V$AREB6_04	-0.1681	0	0
	256	V$IPF1_Q4	-0.1762	0	0
	273	V$POU3F2_01	-0.2295	0	0
	274	V$POU3F2_02	-0.1817	0	0
	283	V$FOXO4_01	-0.1388	0	0
	295	V$PAX2_02	-0.2281	0	0
	328	V$CEBPGAMMA_Q6	-0.2428	0	0
	339	V$HOXA4_Q2	-0.1315	0	0
	346	V$MTF1_Q4	-0.0851	0	0
	366	V$ICSBP_Q6	-0.3209	0	0
	379	V$HP1SITEFACTOR_Q6	-0.2565	0	0
	438	V$NF1_Q6_01	-0.1962	0	0
	467	V$E2F1_Q3_01	-0.1846	0	0
	507	RRAGTTGT_UNKNOWN	-0.2094	0	0
	508	RRCCGTTA_UNKNOWN	-0.2283	0	0
	514	SMTTTTGT_UNKNOWN	-0.1028	0	0
	541	YATTNATC_UNKNOWN	-0.1926	0	0
	552	YTAAYNGCT_UNKNOWN	-0.3082	0	0
	582	STTTCRNTTT_V$IRF_Q6	-0.2739	0	0
	598	YATGNWAAT_V$OCT_C	-0.1199	0	0
